# Supplementary material for: Hepatitis C Virus Infection and Intrinsic Disorder in the Signaling Pathways Induced by Toll-Like Receptors
Source: MDPI journal article supplement (doi:10.3390/biology11071091), 2022-07-21
Supplement: s1 [file s1]

# Supplementary Materials

## Hepatitis C virus infection and intrinsic disorder in the signaling pathways induced by toll-like receptors

Elrashdy M. Redwan <sup>1,2</sup>, Abdullah A. Aljadawi <sup>1</sup>, and Vladimir N. Uversky <sup>1,3,\*</sup>

<sup>1</sup> Biological Science Department, Faculty of Science, King Abdulaziz University, P.O. Box 80203, Jeddah, 21589, Saudi Arabia; [lradowan@kau.edu.sa](mailto:lradowan@kau.edu.sa) (E.M.R.); [aaljaddawi@kau.edu.sa](mailto:aaljaddawi@kau.edu.sa) (A.A.A.)

<sup>2</sup> Therapeutic and Protective Proteins Laboratory, Protein Research Department, Genetic Engineering and Biotechnology Research Institute, City for Scientific Research and Technology Applications, New Borg EL-Arab, Alexandria, 21934, Egypt; [radowan@gmail.com](mailto:radowan@gmail.com)

<sup>3</sup> Department of Molecular Medicine and USF Health Byrd Alzheimer's Research Institute, Morsani College of Medicine, University of South Florida, Tampa, FL 33612, USA; [vuversky@usf.edu](mailto:vuversky@usf.edu)

\* Correspondence: [vuversky@usf.edu](mailto:vuversky@usf.edu)

**Supplementary Figure S1.** Amino acid sequences, structural and intrinsic disorder-based features of HCV proteins, human TLRs, and major players of the TLR-regulated downstream signaling pathways. With exception for HCV proteins, information for each protein includes amino acid sequence in FASTA format, disorder profile generated based on the outputs of RIDAO, functional disorder profile generated by D<sup>2</sup>P<sup>2</sup>, protein-protein interaction network generated by STRING, and a model of 3D structure generated by AlphaFold. For HCV polyprotein and mature individual proteins, amino acid sequences and disorder profile generated based on the outputs of RIDAO are shown.

## HCV proteins

>sp|P27958|POLG\_HCV77 Genome polyprotein OS=Hepatitis C virus genotype 1a (isolate H77) OX=63746 PE=1 SV=3

MSTNPKPQRKTKRNTNRRPQDVKFPGGGQIVGGVYLLPRRGPRLGVRATRKTSESRQPRGRRQPIPKARRPEGRWTAQPGYPWPL  
YGNEGCGWAGWLLSPRGSRPSWGPTDPRRRSRNLGKVIDTLTCGFADLMGYIPLVGAPLGGAARALAHGVRVLEDGVNYATGNLP  
GCSFSIFLLALLSCLTVPASAYQVRNSSGLYHVTNDCPNSSVVEAADAHLHTPGCVPCVREGNASRCWVAVTPTVATRDGKLP  
TQLRRHIDLLVGSATLCSALYVGDLCGSVFLVGLQFTFSRHHWTTQDCNCSIYPGHITGHRMAWNMMMNWSPTAALVVAQLLRI  
PQAIMDMIAGAHWGLAGIKYFSMVGWAKVLVVLVLLFAGVDAETHVTGGNAGRTTAGLVGLLTPGAKQNIQLINTNGSWHINST  
ALNCNESLNTGWLAGLFYQHKFNSSGCPERLASCRRLTDFAQGWGPISYANGSGLDERPYCWHYPPRPGGIVPAKSVCGPVYCF  
PSPVVVGTTRDSGAPTYSWGANDTDVFLVNNTRPPLGNWFGCTWMNSTGFTKVCGAPPCVIGGVGNNTLLCPTDCFRKYPEATYS  
RCGSGPRITPRCMVDYPYRLWHYPCTINYTIFKVRMYVGGVEHRLEAACNWTGRERCDEDRDRSELSPLLLSTTQWQVLPSCFT  
TLPALSTGLIHLHQINIVDVQYLYGVGSSIASWAIKWEYVVLFLLLADARVCSCLWMMLLISQAEAALENLVILNAASLAGTHGL  
VSFLVFFCFAWYLGKRWVPGAVYALYGMWPLLLLLLLALPQRAYALDTEVAASCGGVVLVGLMALTLSPYYKRYISWCMWWLQYFL  
TRVEAQLHVWVPLNVRGGRDAVILLTCVHVPALVFDITKLLAIFGPLWILQASLLKVYPFVRVQGLLRICALARKIAGGHYVQ  
MAI IKLGALTGTCTVYNHLAPLRDWAHNGLRDLAVAVEPVVFSRMETKLITWGADTAACGDI INGLPVSARRGQEILLGPADGMVS  
KGWRL LAPITAYAQQTRGLLGCIIITSLTGRDKNQVEGEVQIVSTATQTFLATCINGVCWTVYHGAGTRTIASPKGPVIQTYTNVD  
QDLVGWPAPQGSRLTPTCTCGSSDLYLVTRHADVIPVRRRGDSRGSLLSPRPISYLGSSGGPLLCPTGHAVGLFRAAVCTRGVA  
KAVDFIPVENLETTMRSPVFTDNSSPPAVPQSFQVAHLHAPTSGSKSTKVPAAAYAAGKYKVLVNLNPSVAATLGFAYMSKAHGD  
PNIRTGVRTITTTGSPITYSTYGKFLADAGCSGGAYDIIICDECHSTDATSI SIGIGTVLDQAETAGARLVVLTATATPPGSVTVSH  
NIEEVALSTTGEIPFYGAIPLEVIKGRHLIFCHSKKKCDELA AKLVALGINAVAYYRGLDVSVIPTSGDVVVVSTDALMTGFT  
GDFDSVIDCNTCVTQTVD FSLDPTFTIETTTLPQDAVSRTQRRGRTGRGKPGIYRFVAPGERPSGMFDSSVLCECYDAGCAWYEL  
TPAETTVRLRAYMNTPLPVCQDHLGFWEVFTGLTHIDAHFLSQTQKSGENFPYLVAYQATVCARAQAPPPSWDQMRKCLIRLK  
PTLHGPTPLLYRLGAVQNEVTLTHTPITKYIMTCSADLEVVSTWVLVGGVLAALAAAYCLSTGCVVIVGRIVLSGKPAIIPDREV  
LYQEFDEMEEC SQHLPYIEQGMMLAEQFKQKALGLLQTASRHAEVITPAVQTNWQKLEVFVWAKHMWNFISGIQYLAGLSTLPGNP  
AIASLMAFTA AVTSPLTTGQTLFNLGGWVAAQLAAPGAATAFVGAGLAGAALDSVGLGKVLVDILAGYGAGVAGALVAFKIMS  
GEVPSTEDLVNLLPAILSPGALAVGVVFASILRRRVGPGEVQWMNRLIAFASRGNHVSPTHYVPESDAAARVTAISSLTVTQ  
LLRRLHQWISSECTTPCSGSLWRDIWDWICEVLSDFKTWLKAKLMPQLPGIPFVSCQRGYRGVWRGDGIMHTRCHCGAEITGHVK  
NGTMRIVGPRCTKNMWSGTTFFINAYTTGPCTPLPAPNYKFALWRVSAEEYVEIRRVGDFHYVSGMTTDNLKCPCQIPSPFEFFTEL  
DGVRLHRFAPPCKPLLREEVSFRVGLHEYPVGSQLPCEPEPDVAVLTSMLTDP SHITAEAAAGRRLARGSPPSMASSASQLSAPS  
LKATCTANHDSPDAELIEANLLWRQEMGGNITRVESENKVILDSFDP LVAEEDEREVSVP AEILRKSRRFAPALPVWARP DYNP  
LLVETWKKPDYEPVHVGCPLPPPRSPVPVPPPRKKRTVVLTESTLPTALAE LATKSFGSSSTSGITGDNTTTSSEPAPSGCPPDS  
DVESYSSMPPLEGE PGDPDLSDGSWSTVSSGADTEDVCCSMSYSWTGALVTPCAAE EQKL PINALSNNLLRHNNLVYSTTSRSA  
CQRKKKVTFDRLQVLD SHYQDLKEVKAAASKVKANLLSVEEACSLAPPHSAKSKFGYGA KDVRCHARKAVAHINSVWKDLLED  
VTPIDTTIMAKNEVFCVQPEKGGRKPARLIVFPDLGVRVCEKMA LYDVVSKLPLAVMGSSYGFQYSPGQ RVEFLVQAWKSKKTPM  
GLSYDTRCFDSTVTESDIRTEEA IYQCCDLDPQARVAIKSLTERLYVGGPLTNSRGENCGYRRCRASRVLT TSCGNTLTRYIKAR  
AACRAAGLQDCTMLVCGDDL VVICESAGVQEDAASLRAFTEAMTRY SAPPGDPPQPEYDLELITSCSSNVSV AHDGAGKRVYYLT  
RDPTTPLARA AWETARHTPVNSWLGNIIMFAPTLWARMILMTHFFSVLIARDQLEQALNCEIYGACYSIEPLDL PPIIQRLHGLS  
AFSLHSYSPGEINRVAACLRKLGVPPLRAWRHRAWSVRARLLARGGKAAICGKYLFNWA VRTKLKLTPI TAAGRDLDSGWFTAGY  
SGGDIYHSVSHARPRWFWFC LLLLLAAGVG IYLLPNR

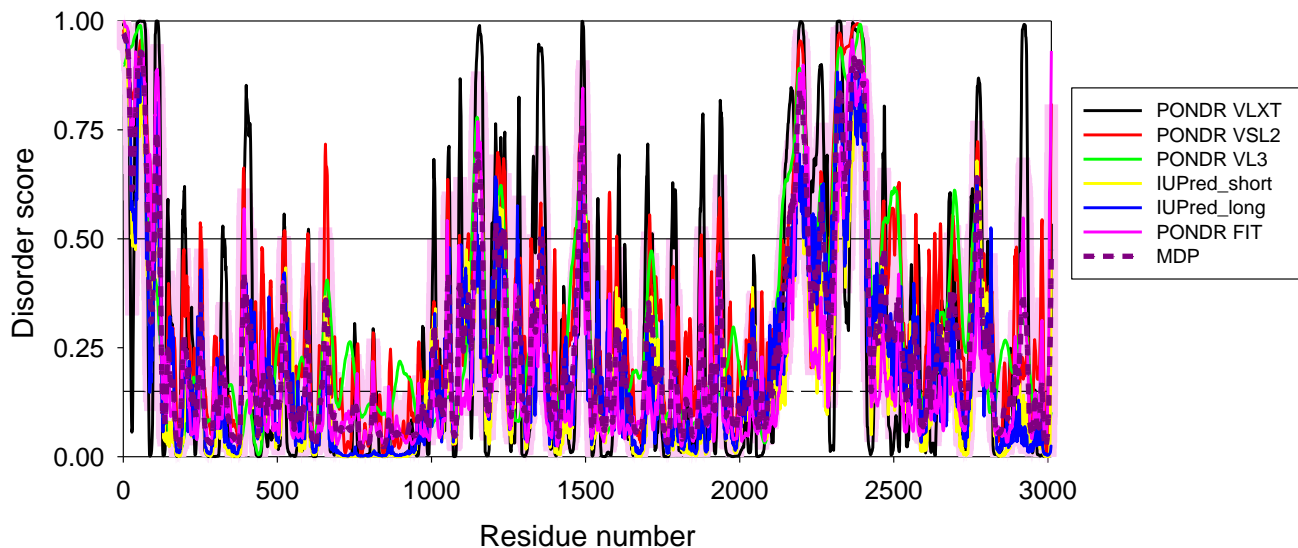



>sp|P27958|2-177 Core (2-177)

STNPKPQRKTKRNTNRRPQDVKFPGGGQIVGGVYLLPRRGPRLGVRATRKTSESRQPRGRRQPIPKARRPEGRTWAQPGYPWPLY  
GNEGCGWAGWLLSPRGSRPSWGPTDPRRRSRNLGKVIDTLTCGFADLMGYIPLVGAPLGGAARALAHGVRVLEDGVNYATGNLPG  
CSFSIF

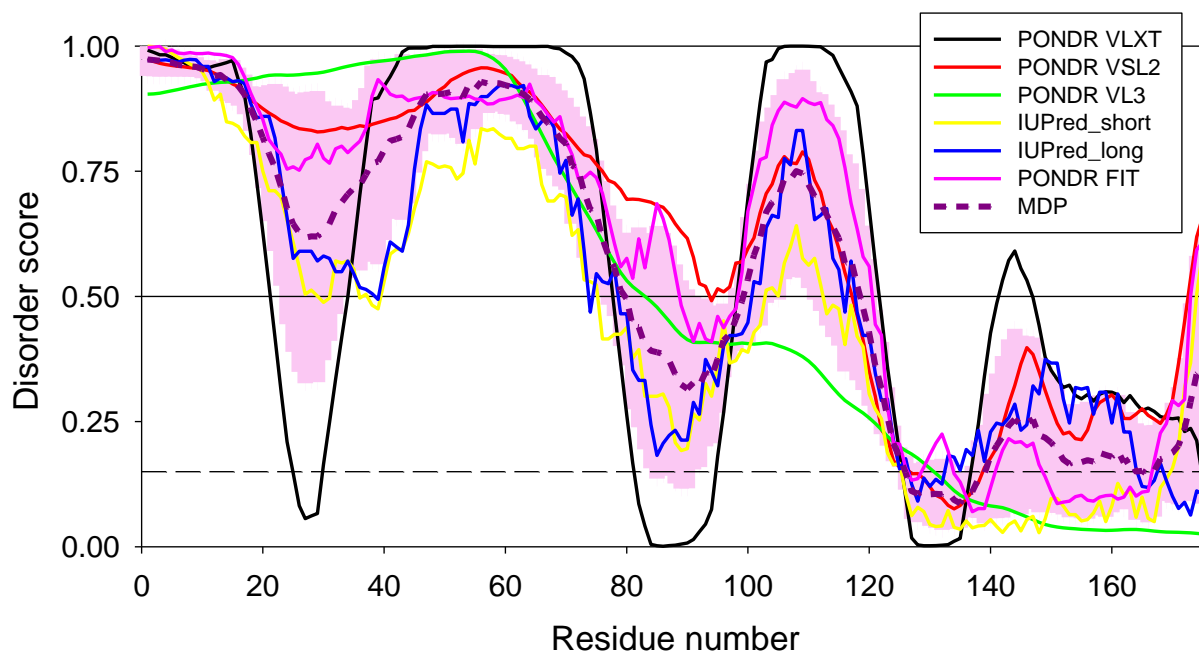

>sp|P27958|192-383 E1 (192-383)

YQVRNSSGLYHVTNDCPNSSVVYEAADAILHTPGCVPCVREGNASRCWVAVTPTVATRDGKLPTTQLRRHIDLLVGSATLCSALY  
VGDLCGSVFLVGQLFTFSPRHHWTTQDCNCSIYPGHITGHRMAWNMMMNWSPTAALVVAQLLRIPQAIMDMIAGAHWGVLAGIKY  
FSMVGNWAKVLVVLLLFAGVDA

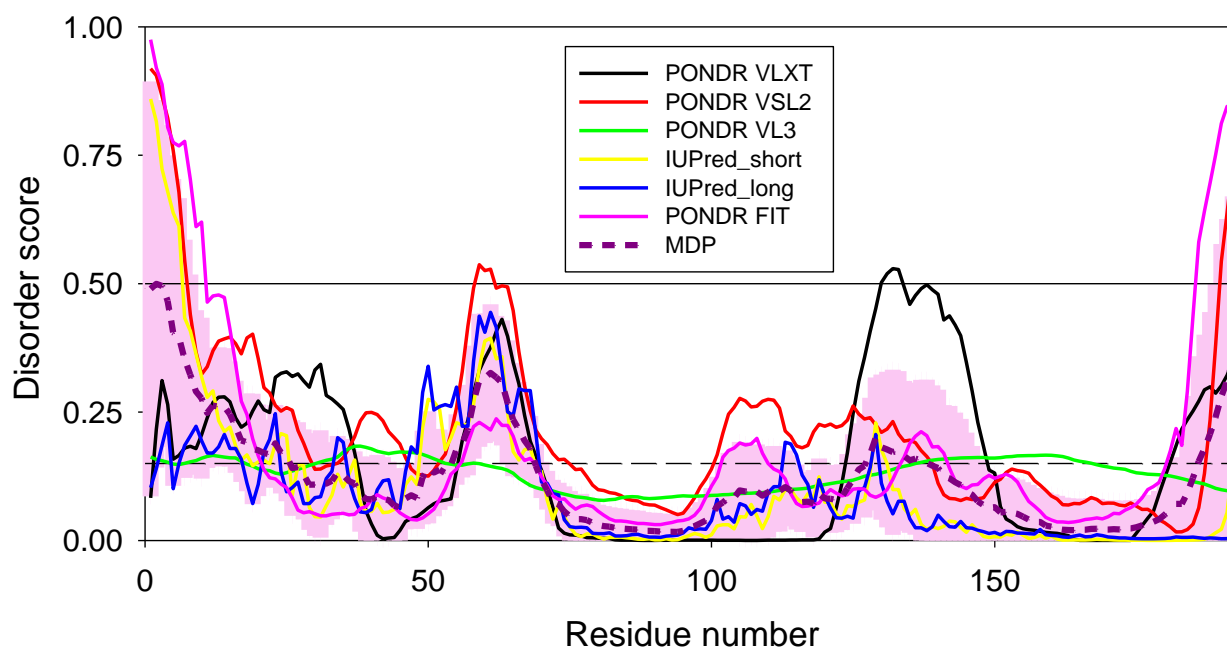

>sp|P27958|384-746 E2 (384-746)

ETHVTGGNAGRTTAGLVGLLTPGAKQNIQLINTNGSWHINSTALNCNESLNTGWLAGLFYQHKNSSGCPERLASCRRLTDFAQG  
 WGPISYANGSGLDERPYCWHYPPRPGGIVPAKSVCGPVYCFTSPVVGTTDRSGAPTYSWGANDTDVFLNNTRPPLGNWFGCT  
 WMNSTGFTKVCGAPPCVIGGVGNNTLLCPTDCFRKYPEATYSRCGSGPRITPRCMVDYPYRLWHYPCTINYTIFKVRMYVGGVEH  
 RLEAACNWTGRGERCDLEDNRSELSPLLLSTTQWQVLPFSFTTLPALSTGLIHLHQNIQVQYLYGVGSSIASWAIKWEYVLLF  
 LLLADARVCSCLWMMMLLISQAEA

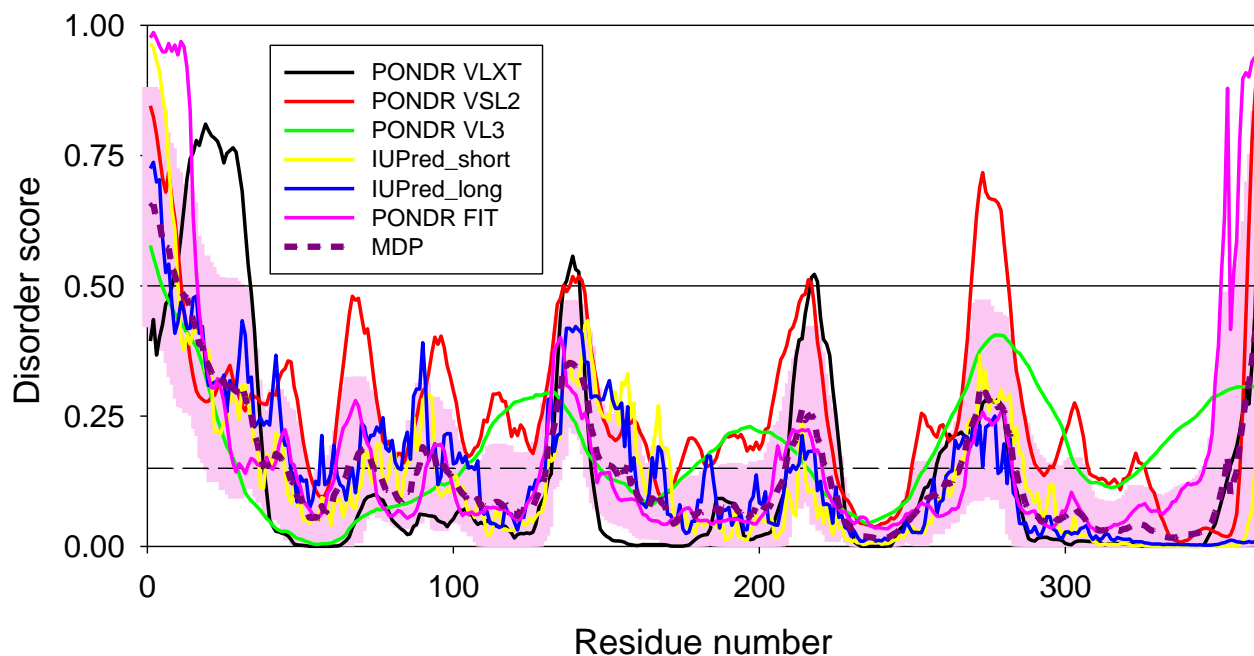

>sp|P27958|747-809 p7 (747-809)

ALENLVILNAASLAGTHGLVSFLVFFCFAWYLKGRWVPGAVYALYGMWPLLLLLLLALPQRAYA

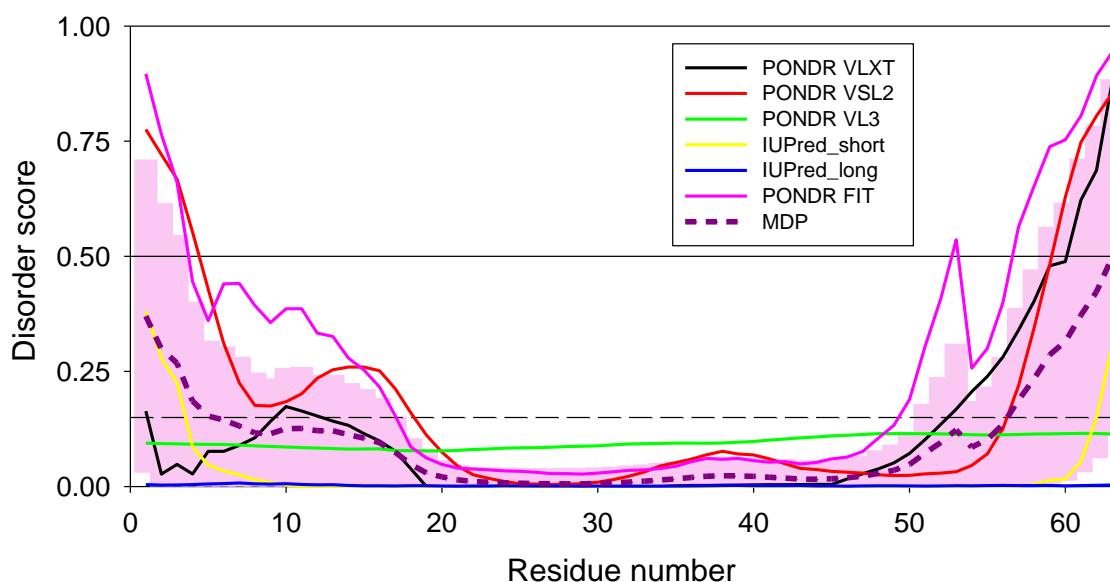

>sp|P27958|810-1026 NS2 (810-1026)

LDTEVAASC GG VVLVGLMALTLS PYYKRYISWCMWWLQYFLTRVEAQLHVWVPPNLNVRGGRDAVILLTCVVHPALVFDITKLLLA  
IFGPLWILQASLLKVPYFVRVQGLLRICALARKIAGGHYVQMAIIKLGALTGTVCVYNHLAPLRDWAHNGLRDLAVAVEPVVFSRM  
ETKLITWGADTAACGDIINGLPVSARRGQEILLGPADGMVSKGWRL

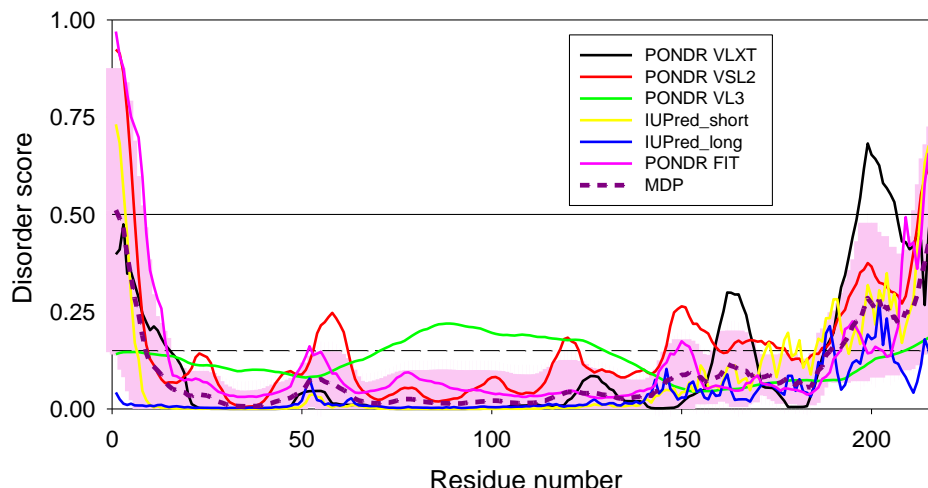

>sp|P27958|1027-1657 NS3 (1027-1657)

APITAYAQQTRGLLGCIITS LTGRDKNQVEGEVQIVSTATQTFLATCINGVCWTVYHGAGTRTIASPKGPVIQTYTNVDQDLVGW  
PAPQGSRS LTPCTCGSSDLYLVTRHADVIPVRRRGDSRGSLLSPRPISYLGSSGGP LLCPTGHAVGLFRAAVCTRGVAKAVDFI  
PVENLETTMRSPVFTDNSSPPAVPQSFQVAHLHAPTSGSKSTKVPAAAYAAGKYKVLVLNPSVAATLGFGAYMSKAHGVDPNIRTG  
VRTITTGSPITYSTYTGKFLADAGCSGGAYDIIICDECHSTDATSISGIGTVLDQAETAGARLVV LATATPPGSVTVSHPNIEEVA  
LSTTGEIPFYGKAIPLEVIKGRHLIFCHSKKKCDELA AKLVALGINAVAYYRGLDVSVIPTSGDVVVVSTDALMTGFTGDFDSV  
IDCNTCVTQTVD FSLDPTFTIETTTLPQDAVSRTQRRGRTGRGKPGIYRFVAPGERPSGMFDS SVLCECYDAGCAWYELTPAETT  
VRLRAYMNT PGLPVCQDHLGFWEGVFTGLTHIDAHFLS QTKQSGENFPYLVAYQATVCARAQAPPPSWDQMRKCLIRLKPTLHGP  
TPLLYRLGAVQNEVTLTHPITKYIMTCMSADLEVVT

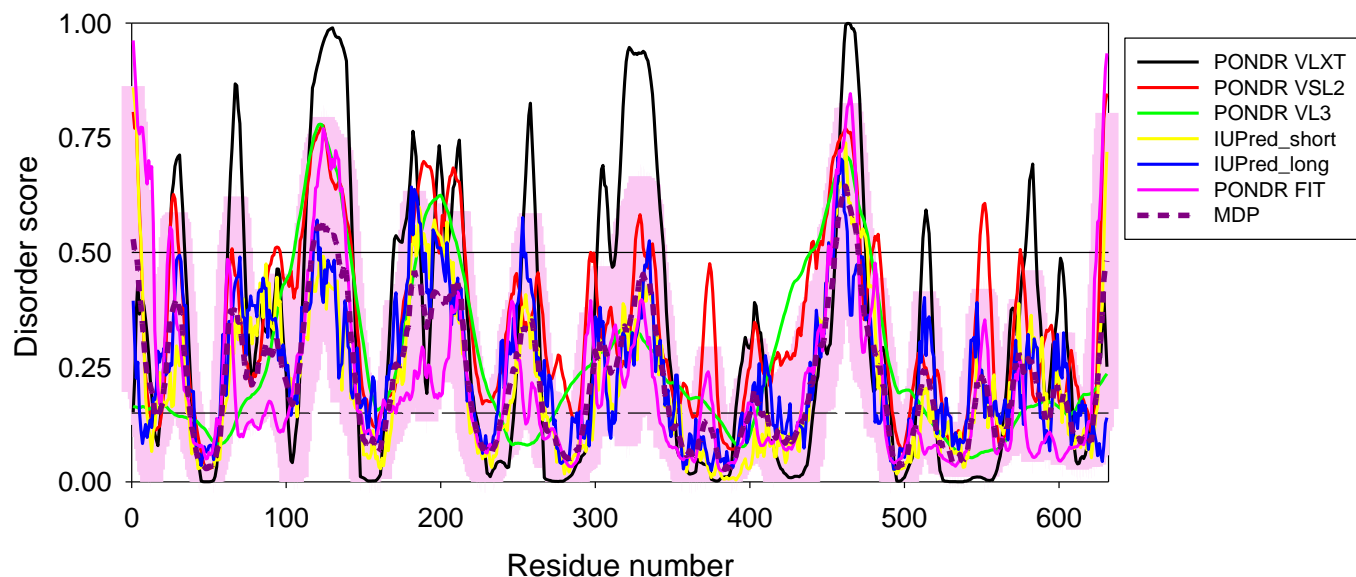

>sp|P27958|1658-1711 NS4A (1658-1711)

STWVLVGGVLAALAAAYCLSTGCVVIVGRIVLSGKPAIIPDREVLVYQEFDEMEEC

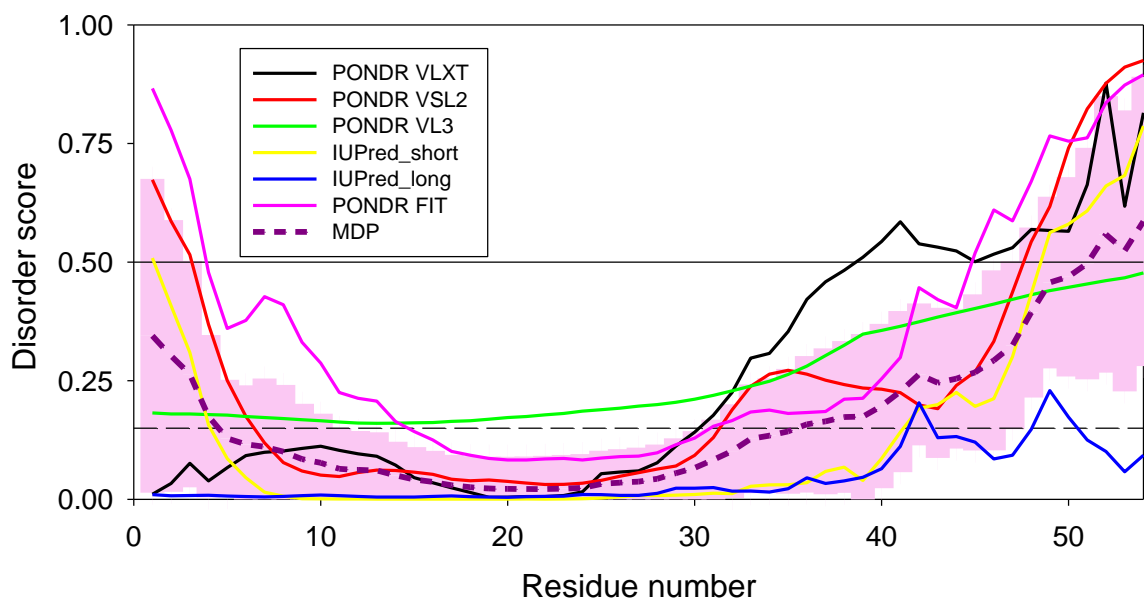

>sp|P27958|1712-1972 NS4B (1712-1972)

SQHLPLYIEQGMMLAEQFKQKALGLLQTASRHAIEVITPAVQTNWQKLEVFwakHMWNFISGIQYLAGLSTLPGNPAIASLMAFTAA  
 VTSPLTTGQTLLFNILGGWVAAQLAAPGAATAFVGAGLAGAALDSVGLGKVLVDILAGYGAGVAGALVAFKIMSGEVPSTEDLVN  
 LLPAILSPGALAVGVVFASILRRRVGPGEGAVQWMNRLIAFASRGNHVSPTHYVPESDAAARVTAILSSLTVTQLLRRLHQWISS  
 ECTTPC

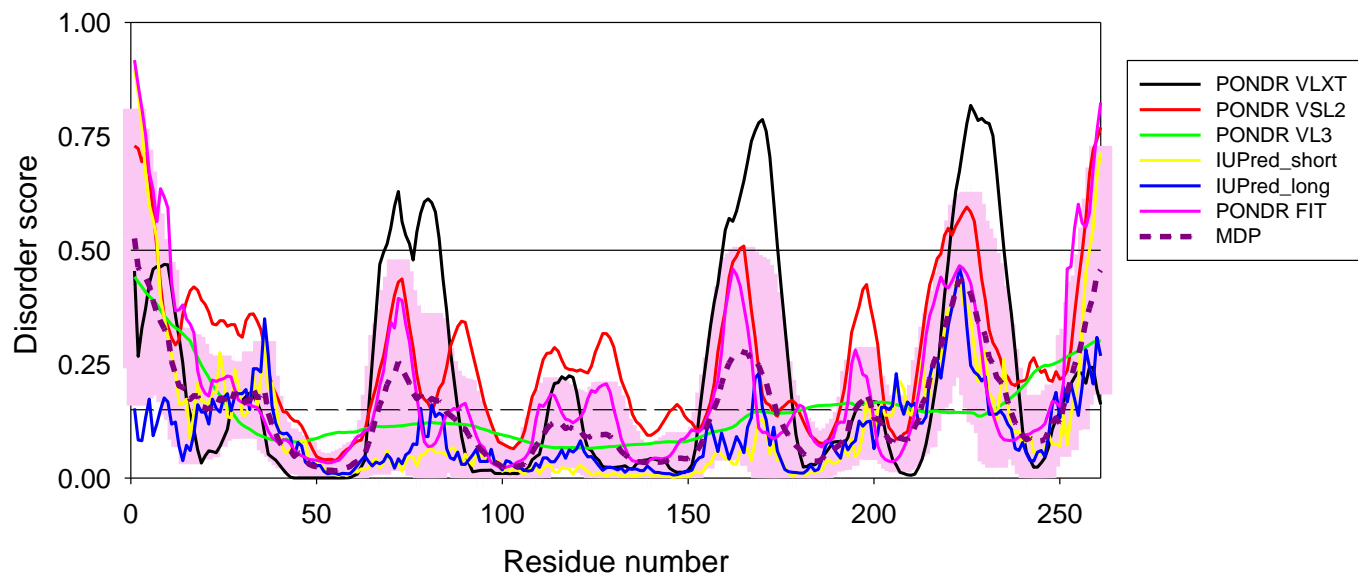

>sp|P27958|1973-2420 NS5A (1973-2420)

SGSWLRDIWDWICEVLSDFKTWLKAKLMPQLPGIPFVSCQRGYRGVWRGDGIMHTRCHCGAEITGHVKNGTMRIVGPRTCKNMWS  
GTFFINAYTTGPCTPLPAPNYKFALWRVSAEEYVEIRRVGDFHYVSGMTTDNLKCPCQIPSPFEFFTELDGVRLLHRFAPPCKPLL  
EEVSFRVGLHEYPVGSQPLPCEPEPDVAVLTSMLTDPSSHITAEAAAGRRLARGSPPSMASSASQLSAPSLKATCTANHDSFDAELI  
EANLLWRQEMGGNITRVESENKVVILDSFDPLVAEEDEREVSVPAEILRKSRRFAPALPVWARPDYNPLLIVETWKKPDYEPVHV  
GCPLPPRSPPVPPPRKKRTVVLTESTLPTALAEELATKSFGSSSTSGITGDNTTTSSEPAFSGCPPDSDVESYSSMPPLEGEPGD  
PDLSDGSWSTVSSGADTEDVVCC

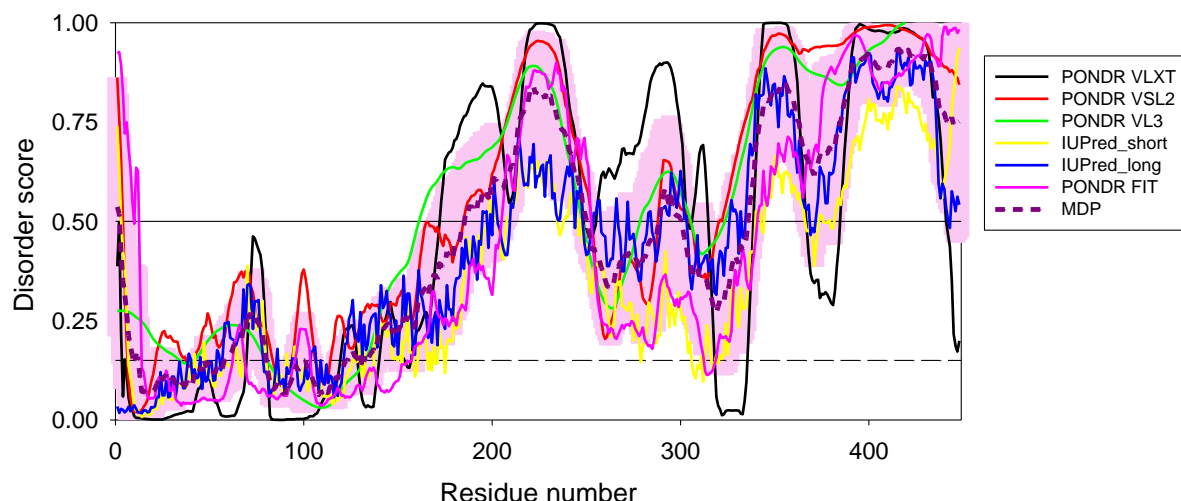

>sp|P27958|2421-3011 NS5B (2421-3011)

SMSYSWTGALVTPCAAEEQKLPINALSNSLLRHNNLVYSTTSRSACQKKKKVTFDRLQVLDSHYQDVLKEVKAAASKVKANLLSV  
EEACSLAPPHSAKSKFGYGAKDVRCHARKAVAHINSVWKDLLEDSTVTPIDTTIMAKNEVFVCVQPEKGGKRKPARLIVFPDLGVRVC  
EKMALYDVVSKLPLAVMGSSYGFQYSPGQRFVFLVQAWKSKKTPMGLSYDTRCFDSTVTESDIRTEEAITYCCDLDPQARVAIKS  
LTERLYVGGPLTNSRGENCYRRCRASRVLTTSNGNTLTTRYIKARAACRAAGLQDCTMLVCGDDLVCESAGVQEDAASLRAFT  
EAMTRYSAAPPDPPQPEYDLELITSCSSNVSVAHDGAGKRVYYLTRDPTTPLARAAWETARHTPVNSWLGNIIMFAPTLWARMIL  
MTHFFSVLIARDQLEQALNCEIYGACYSIEPLDLPPIIQRLHGLSAFSLHSYSPGEINRVAACLRKLGVPPLRAWRHRAWSVRAR  
LLARGGKAAICGKYLFWAVRTKLKLTPITAAGRLDLSGWFTAGYSGGDIYHSVSHARPRWFCLLLLAAGVGIIYLLPNR

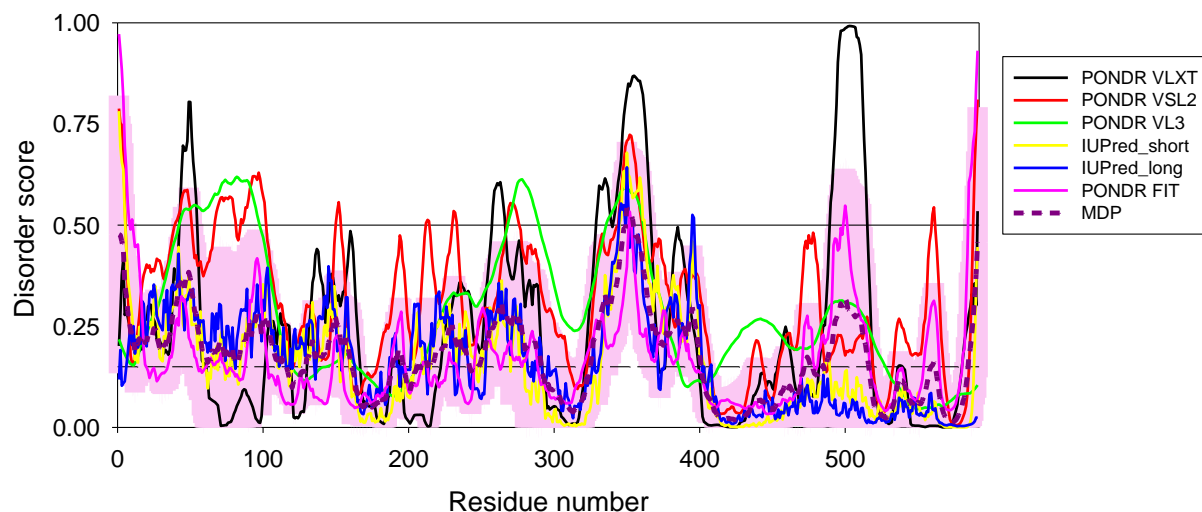

## Human TLRs

```
>sp|Q15399|TLR1_HUMAN Toll-like receptor 1 OS=Homo sapiens OX=9606 GN=TLR1 PE=1 SV=3
MTSIFHFAIIFMLILQIRIQLSESEFLVDRSKNGLIHVPKDL SQKTTILNISQNYISELWTS DILSLSKLRILII SHNRIQYLD
ISVFKFNQELEYLDLSHNKLVKISCHPTVNLKHLDSL FNAFDALPICKEFGNMSQLKFLGLSTTHLEKSSVLP IAHNLNISKVLLV
LGETYGEKEDPEGLQDFNTESLHIVFPTNKEFH FILDVSVKTVANLELSNIKCVLEDNKCSYFLS ILAKLQTNPKLSNLT LNNIE
TTWNSFIRILQLVWHTTVWYFSSISNVKLQGGQ LDFRDFDYSGTSLKALS IHQVVSDVFGFPQSYIYE IFSNMNIKNFTVSGTRMVH
MLCPSKISPFHLHDFSNNLLTDTVFENC GHLTELETILQMNQLKELSKIAEMTTQM KSLQQLDISQNSVSYDEKKGDCSWTKSL
LSLNMSSNILTDTIFRCLPPRIKVLDLHSNKIKS IPKQVVKLEALQELNVAFNSLTDLPGCGS FSSLSVLIIDHNSVSHPSADFF
QSCQKMRSIKAGDNPFQCTCELGEFVKNI DQVSSEVLEGWPD SYKCDYPESYRG TLLKDFHMSSELSCNITLLIVTIVATMLVLAV
TVTSLCSYLDLPWYLRMVCQWTQTRRRARNI PLEELQRNLQFHAFISYSGHDSFWVKNE LLPNLEKEGMQICLHERNFVPGKSIV
ENIITCIEKSYKSIFVLSPNFVQSEWCHYELYFAH HNLFEHGSNSLILILLEPI PQYSIPSSYHKLKS LMARRTYLEWPKEKSKR
GLFWANLRAAINIKLTEQAKK
```

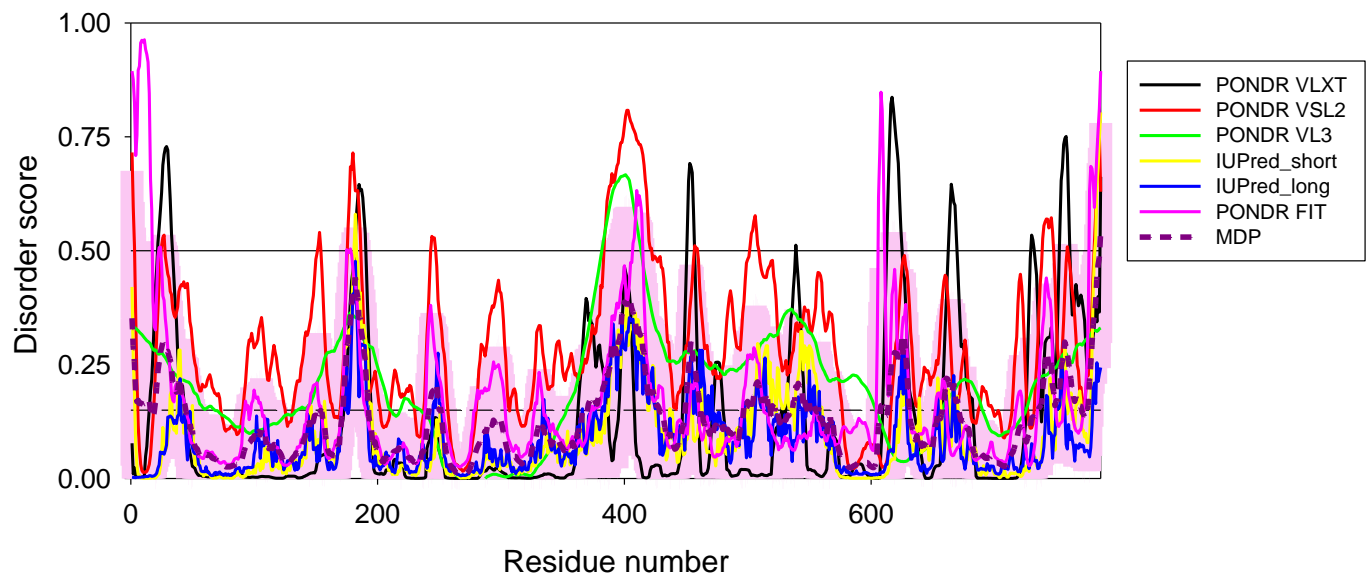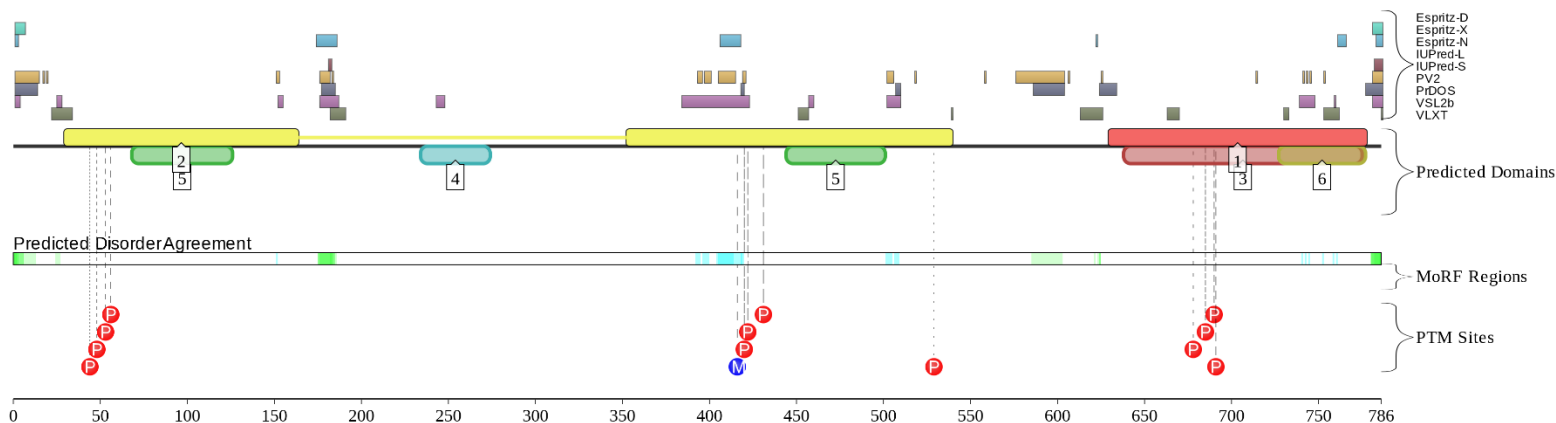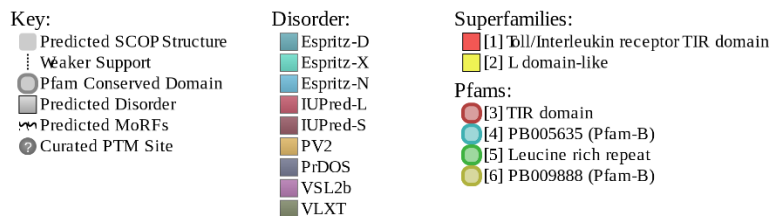



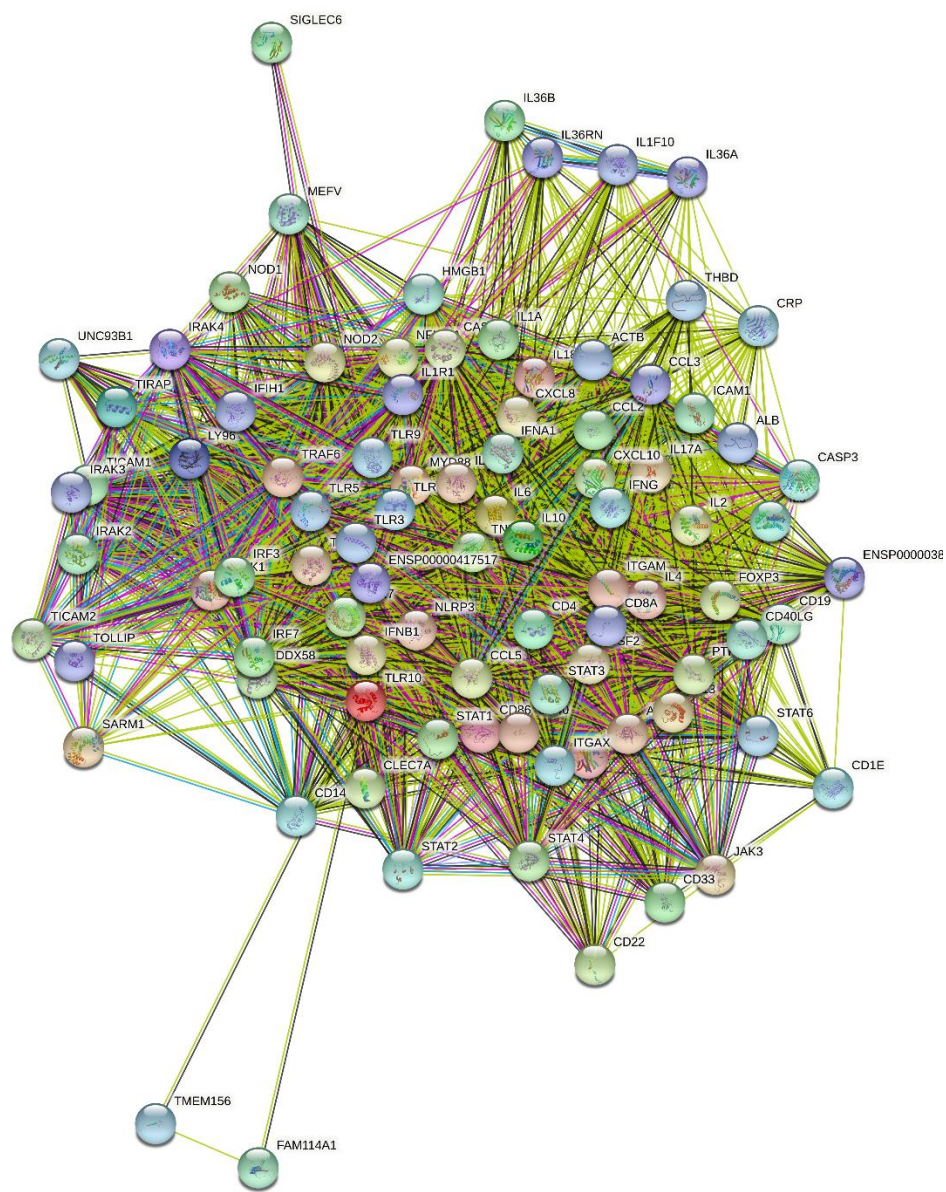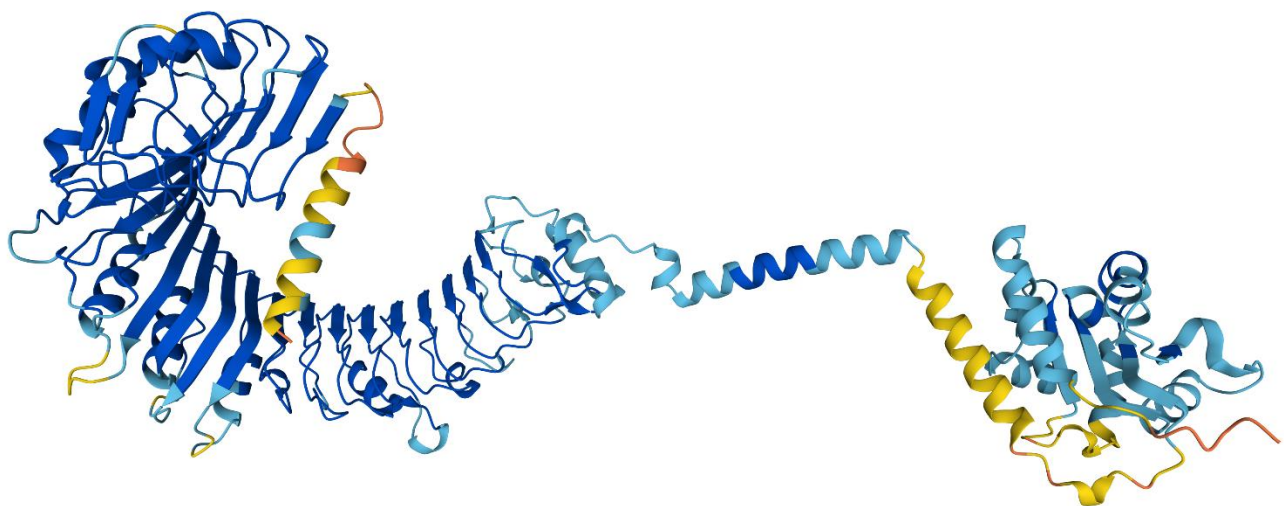

```
>sp|O60603|TLR2_HUMAN Toll-like receptor 2 OS=Homo sapiens OX=9606 GN=TLR2 PE=1 SV=1
MPHTLWMVWVLGVIIISLSKEESSNQASLSCDRNGICKGSSGSLNSIPSGLTEAVKSLDLSNNRITYISNSDLQRCVNLQALVLTS
NGINTIEEDSFSSSLGSLEHLDSLNYLSNLSSSWFKPLSSLTFLNLLGNPYKTLGETSLFSLHTKLQILRVGNMDTFTTKIQRKDF
AGLTFLEELEIDASDLQSYEPKSLKSIQNVSHLILHMKQHILLLEIFVDVTSSVECLELRDLDLDTFHFSELSTGETNSLIKKFT
FRNVKITDESLFQVMKLLNQISGLLELEFDDCTLNGVGNFRASDNDRVIDPGKVETLTIRRLHIPRFYLFYDLSTLYSLTERVKR
ITVENSKVFLVPCLLSQHLKSLEYLDLSENLMVEEYLKNSACEDAWPSLQTLILRQNHASLEKTGETLLTLKNLTNIDISKNSF
HSMPETCQWPEKMKYLNLSSTRIHSVTGCIPKLTLEILDVSNNNLNLFSNLNPQLKELYISRKNLMTLPDASLLPMLLVLKISRNA
ITTFSEKQLDSFHTLTKLEAGGNFICSEFLSFTQEQQALAKVLIDWPANYLCDSPSHVRGQQVQDVRLSVSECHRTALVSGMC
CALFLLILLTGVLCHRFGHLWYMKMMWAWLQAKRKPRKAPSRNICYDAFVSYSERDAYWVENLMVQELFNFPFKLCLHKRDFI
PGKWIIDNIIDSIEKSHKTVFVLSNFVKSEWCKYELDFSHFRLFDENNDAAAILILLEPIEKKAIPQRFCCLRKIMNTKTYLEWP
MDEAQREGFWVNLRAAIKS
```

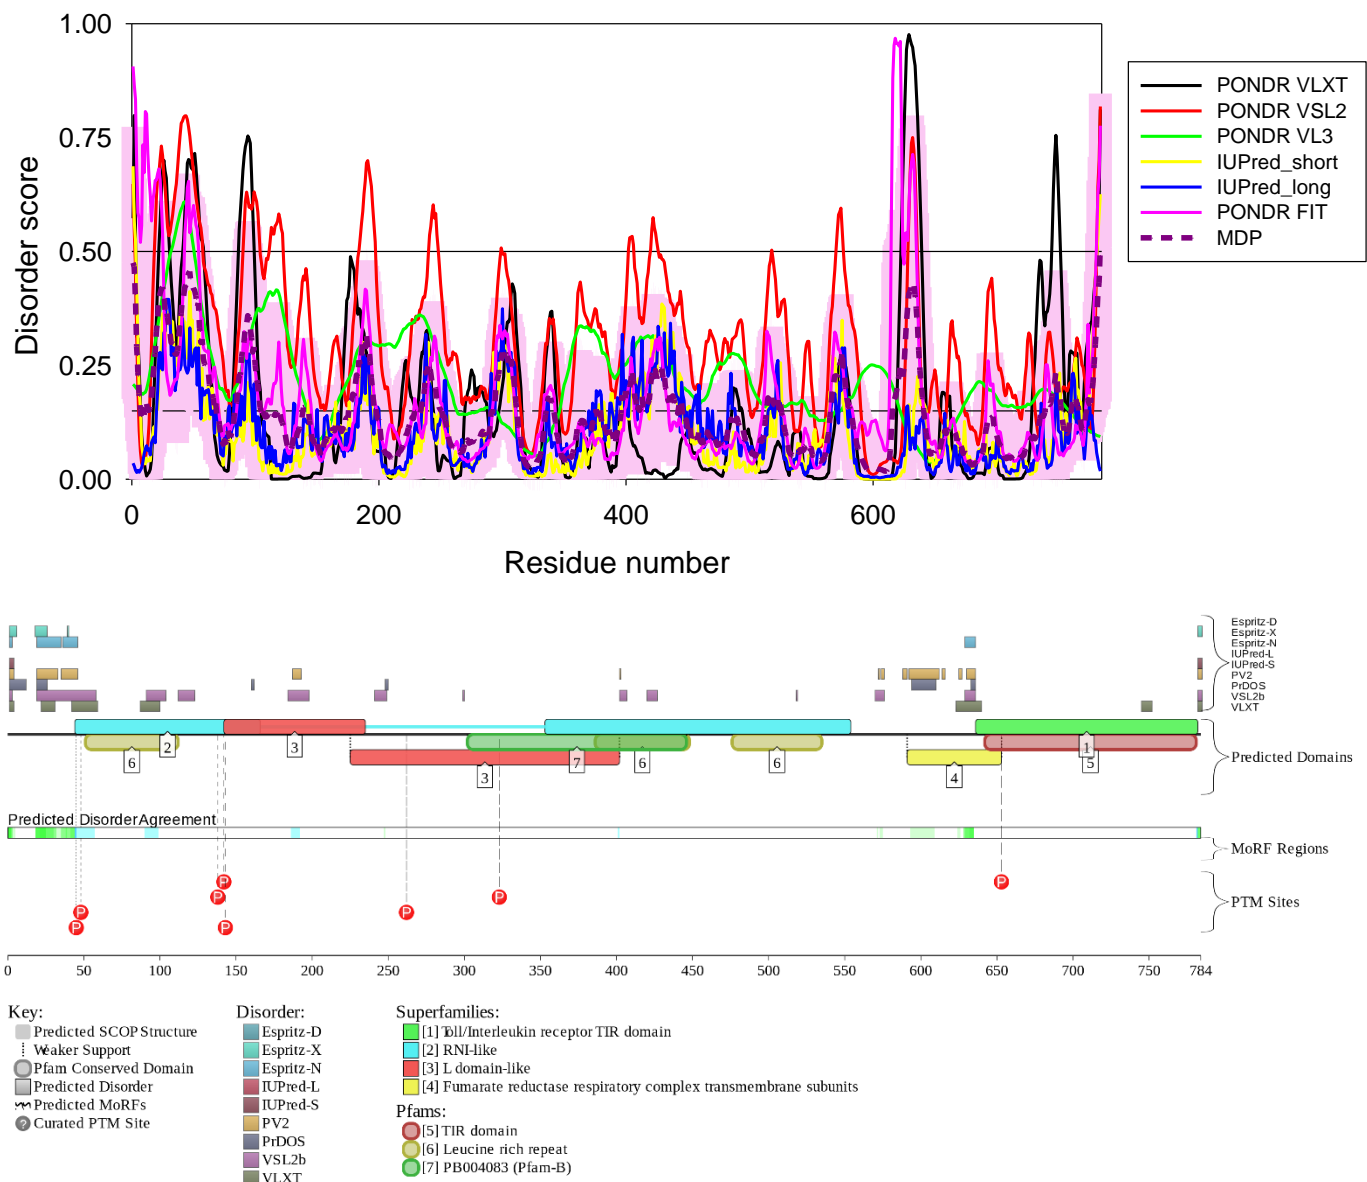



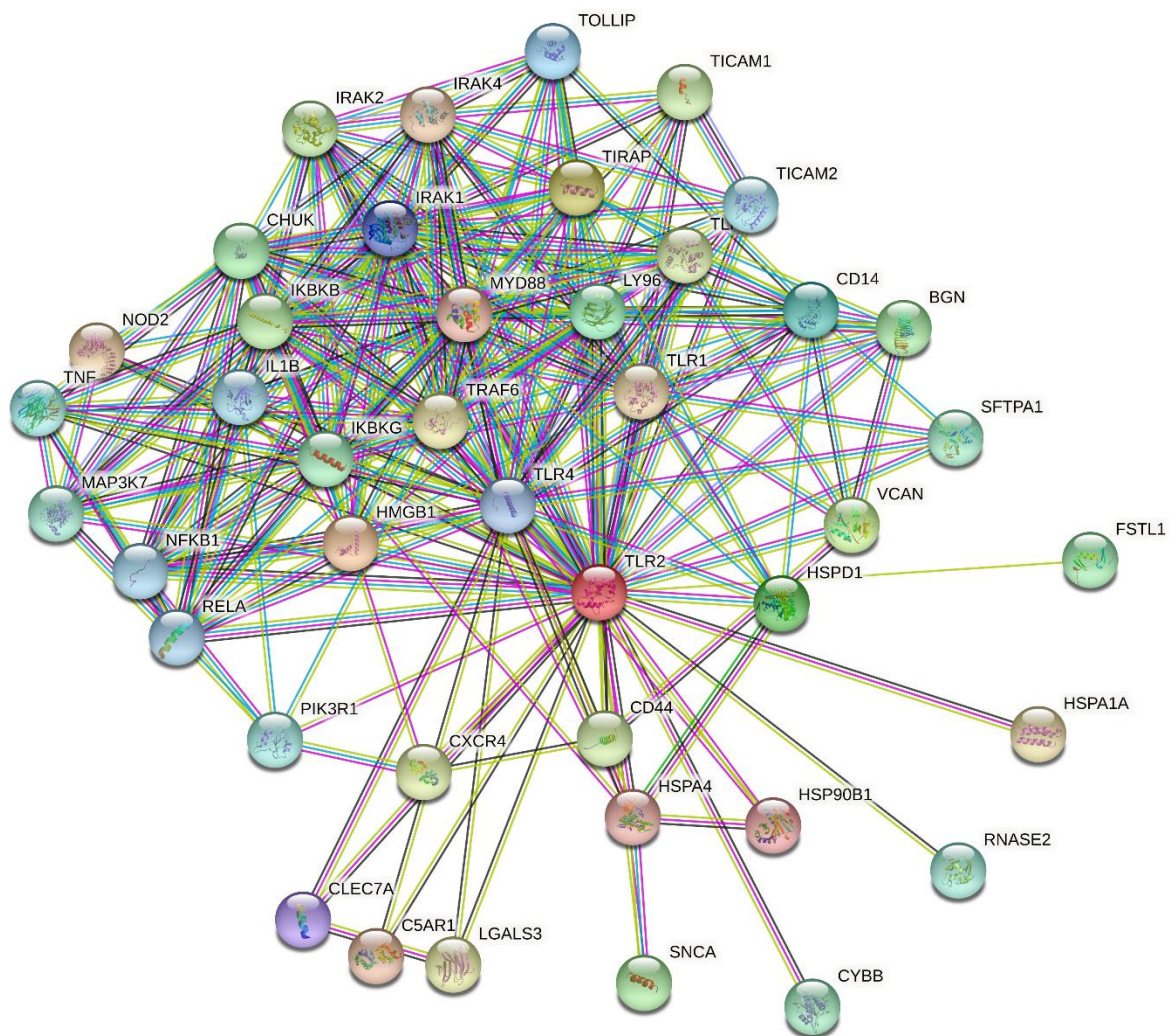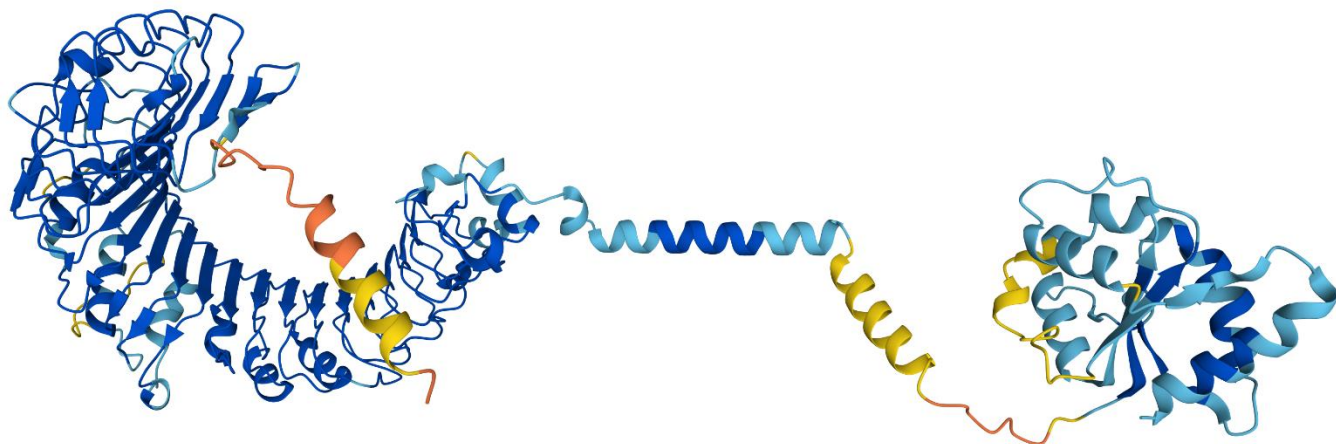

```

>sp|O15455|TLR3_HUMAN Toll-like receptor 3 OS=Homo sapiens OX=9606 GN=TLR3 PE=1 SV=1
MRQTLPCIYFWGGLLPFGMLCASSTTKCTVSHEVADCSHLKLTQVPDDLPTNITVLNLTNQLRRLPAANFTRYSQLTSLDVGFN
TISKLEPELCQKLPMLKVLNLQHNELSQLSDKTFAFCTNLTELHLMSNSIQIKNNPFVKQKNLITLDLSHNGLSSTKLGTQVQL
ENLQELLSNNKIQALKSEELDIFANSSLKKLELSSNQIKEFSPGCFHAIGRLFGLFLNNVQLGPSLTEKLCELANTSIRNLSL
SNSQLSTTSNTTFLGLKWTNLTMLDLSYNNLNLVVGNDSFAWLPQLEYFFLEYNNIQHLFSLHGLFNVRYLNLKRSFTKQSI
ASLPKIDDFSQWLKCLEHLNMDNDIPGIKSNMFTGLINLKYLSLSNSFTSLRTLNETFVSLAHSPLHILNLTKNKISKIESD
AFSWLGHLEVLDLGLNEIGQELTGQEWGLENIFEIYLSYNKYQLQTRNSFALVPSLQRLMLRRVALKNVDSSPSFPQPLRNLT
LDLSNNNIANINDDMLEGLEKLEILDLQHNNLARLWKHANPGGPYFLKGLSHLHILNLESNGFDEIPVEVFKDLFELKIIDLGL
NNLNTLPASVFNNQVSLKSLNLQKNLITSVEKKVFGPAFRNLTELDMRFNPFDCETCSIAWFVNWINEHTHTNIPELSSHYLCNTP
PHYHGFPVRLFDTSCKDSAPFELFFMINTSILLIFIFIVLLIHFEWGRISFYWNVSVHRVLGFKIEDRQTEQFEYAAAYIIHAYK
DKDWVWEHFSSMEKEDQSLKFCLEERDFEAGVFELEAIVNSIKRSRKIIIFVITHLLKDPCKRFKVVHAVQQAIEQNLDSSIILV
FLEEIPDYKLNHALCLRRGMFKSHCILNWPVQKERIGAFRHLKQVALGSKNSVH

```

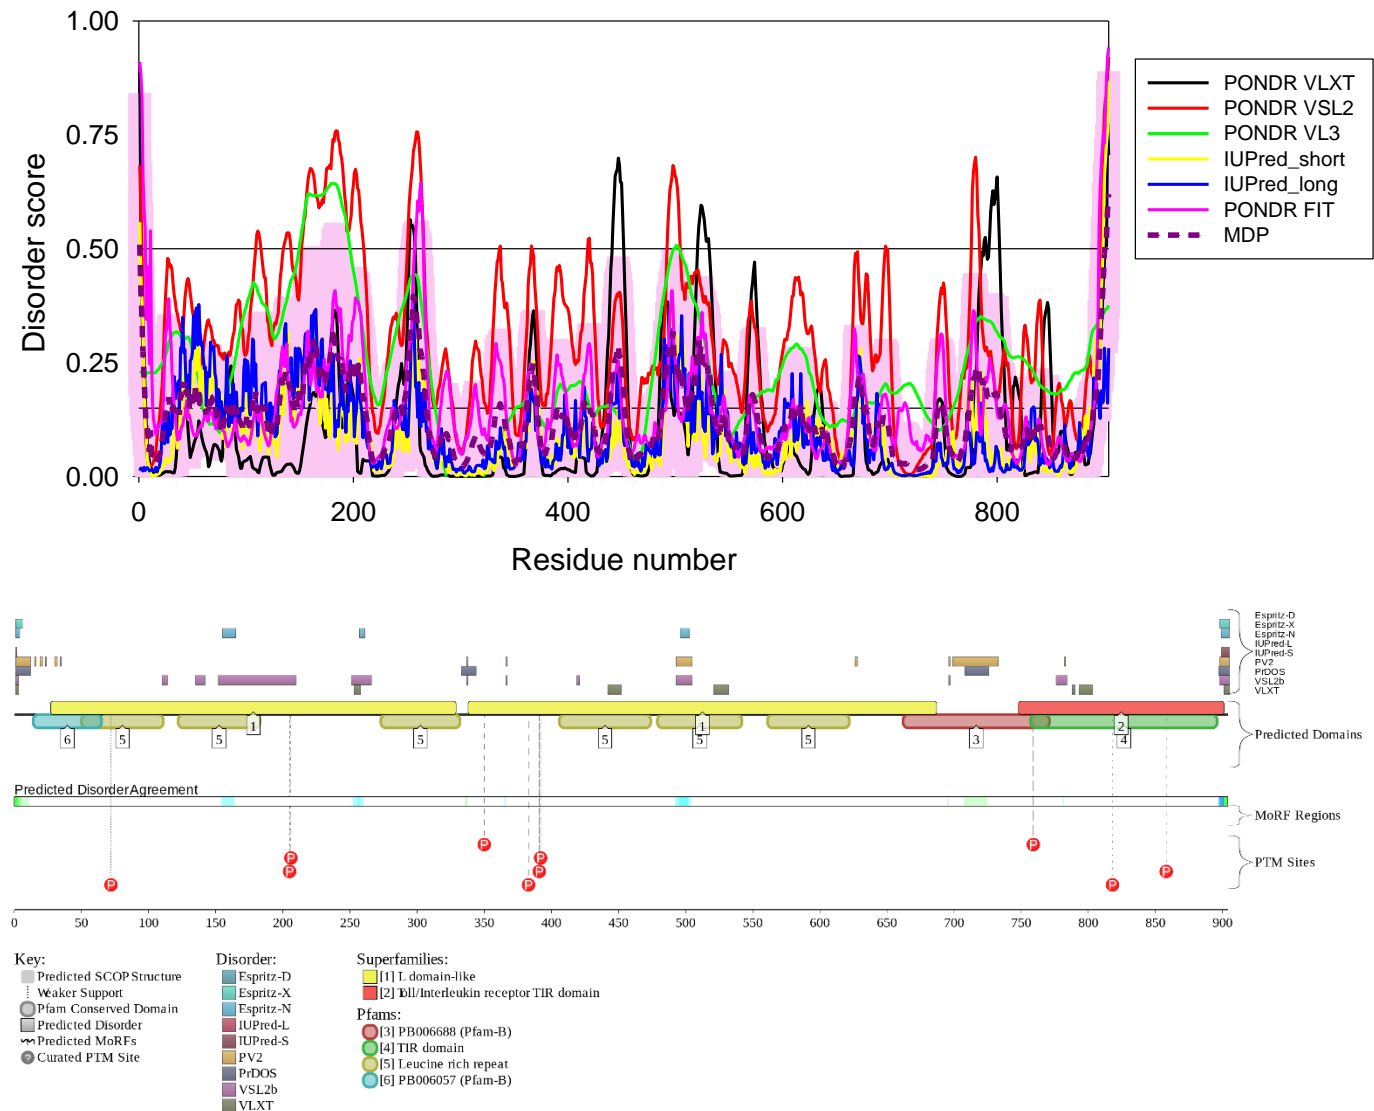

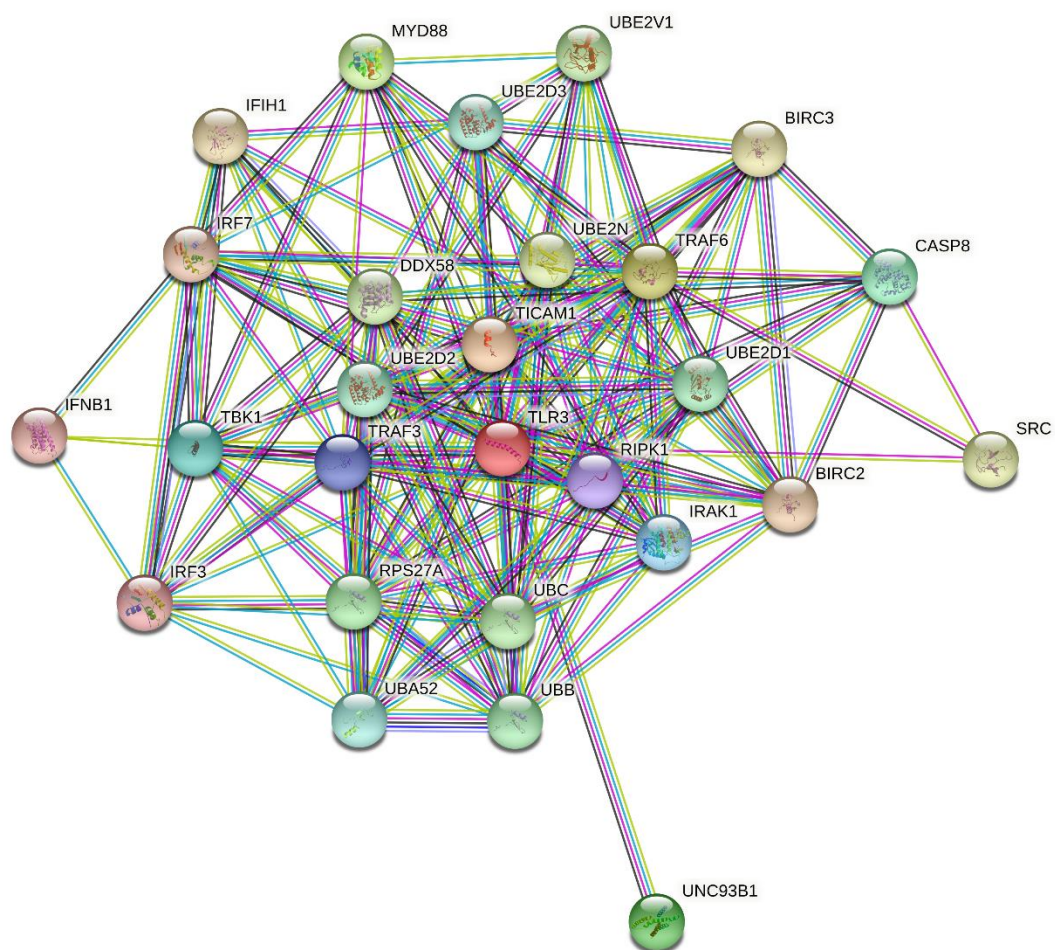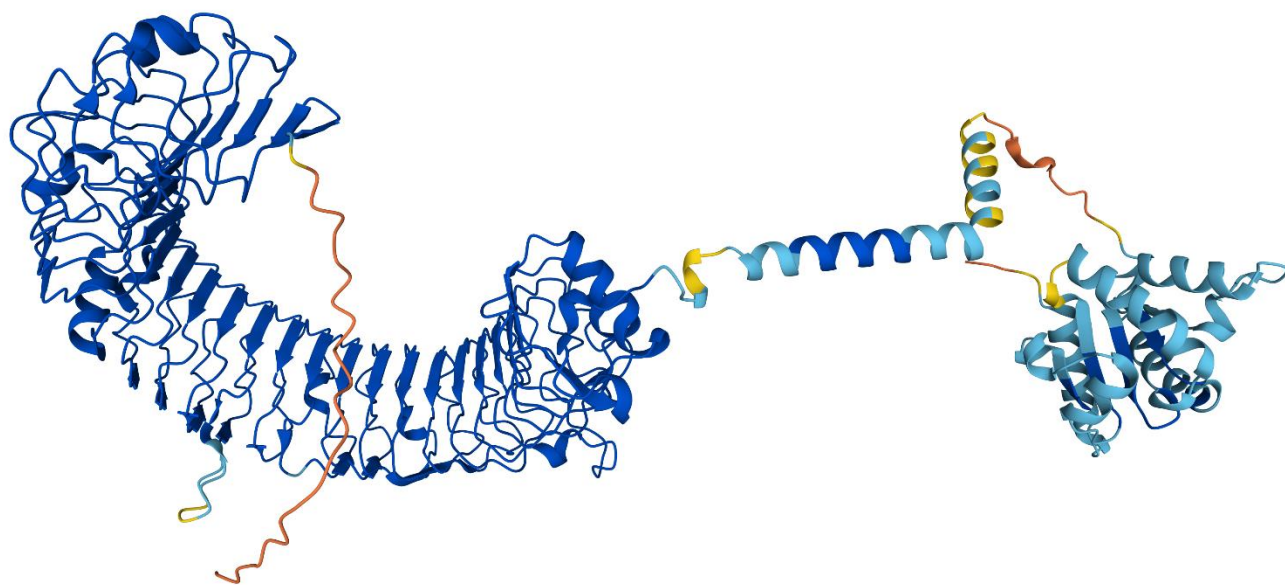



```
>sp|O00206|TLR4_HUMAN Toll-like receptor 4 OS=Homo sapiens OX=9606 GN=TLR4 PE=1 SV=2
MMSASRLAGTLIPAMAFSLCVRPESWEPCVEVVPNITYQCMELNFYKIPDNLFPSTKNLDLSFNPLRHLGYSFFSFPELQVLDL
SRCEIQTIEDGAYQSLSHLSTLILTGNPIQSLALGAFSGLSSLQKLAVETNLASLENFPIGHLKTLKELNVAHNLIQSFKLPEY
FSNLTNLEHLDLSSNKIQSIYCTDLRVLHQMPLLNLSLDLSLNPMMFIQPGAFKEIRLHKLTLRNNFDSLNMVMTCTIQGLAGLEV
HRLVLGEFRNEGNLEKFKDSALEGLCNLTIEEFRLAYLDYLDLDIIDLFNCLTNVSSFSLSVSVTIERVKDFSYNFGWQHLELVNC
KFGQFP TLKLSLKR LTF TS NKG GNA FSEVDLP SLEFLDLSRNGLSFKGCCSQSDFGTTSLKYLDLSFNGVITMSSNFLGLEQLE
HLD FQH S NLK Q M SEFSV FL S R N LI Y L D I S H T H R V A F N G I F N G L S S L E V L K M A G N S F Q E N F L P D I F T E L R N L T F L D L S Q C Q L E Q
L S P T A F N S L S S L Q V L N M S H N N F F S L D T F P Y K C L N S L Q V L D Y S L N H I M T S K K Q E L Q H F P S S L A F L N L T Q N D F A C T C E H Q S F L Q W I K
D Q R Q L L V E V E R M E C A T P S D K Q G M P V L S L N I T C Q M N K T I I G V S V L S V L V V S V V A V L V Y K F Y F H L M L L A G C I K Y G R G E N I Y D A F V I Y
S S Q D E D W V R N E L V K N L E E G V P P F Q L C L H Y R D F I P G V A I A A N I I H E G F H K S R K V I V V S Q H F I Q S R W C I F E Y E I A Q T W Q F L S S R A G
I I F I V L Q K V E K T L L R Q Q V E L Y R L L S R N T Y L E W E D S V L G R H I F W R R L R K A L L D G K S W N P E G T V G T G C N W Q E A T S I
```

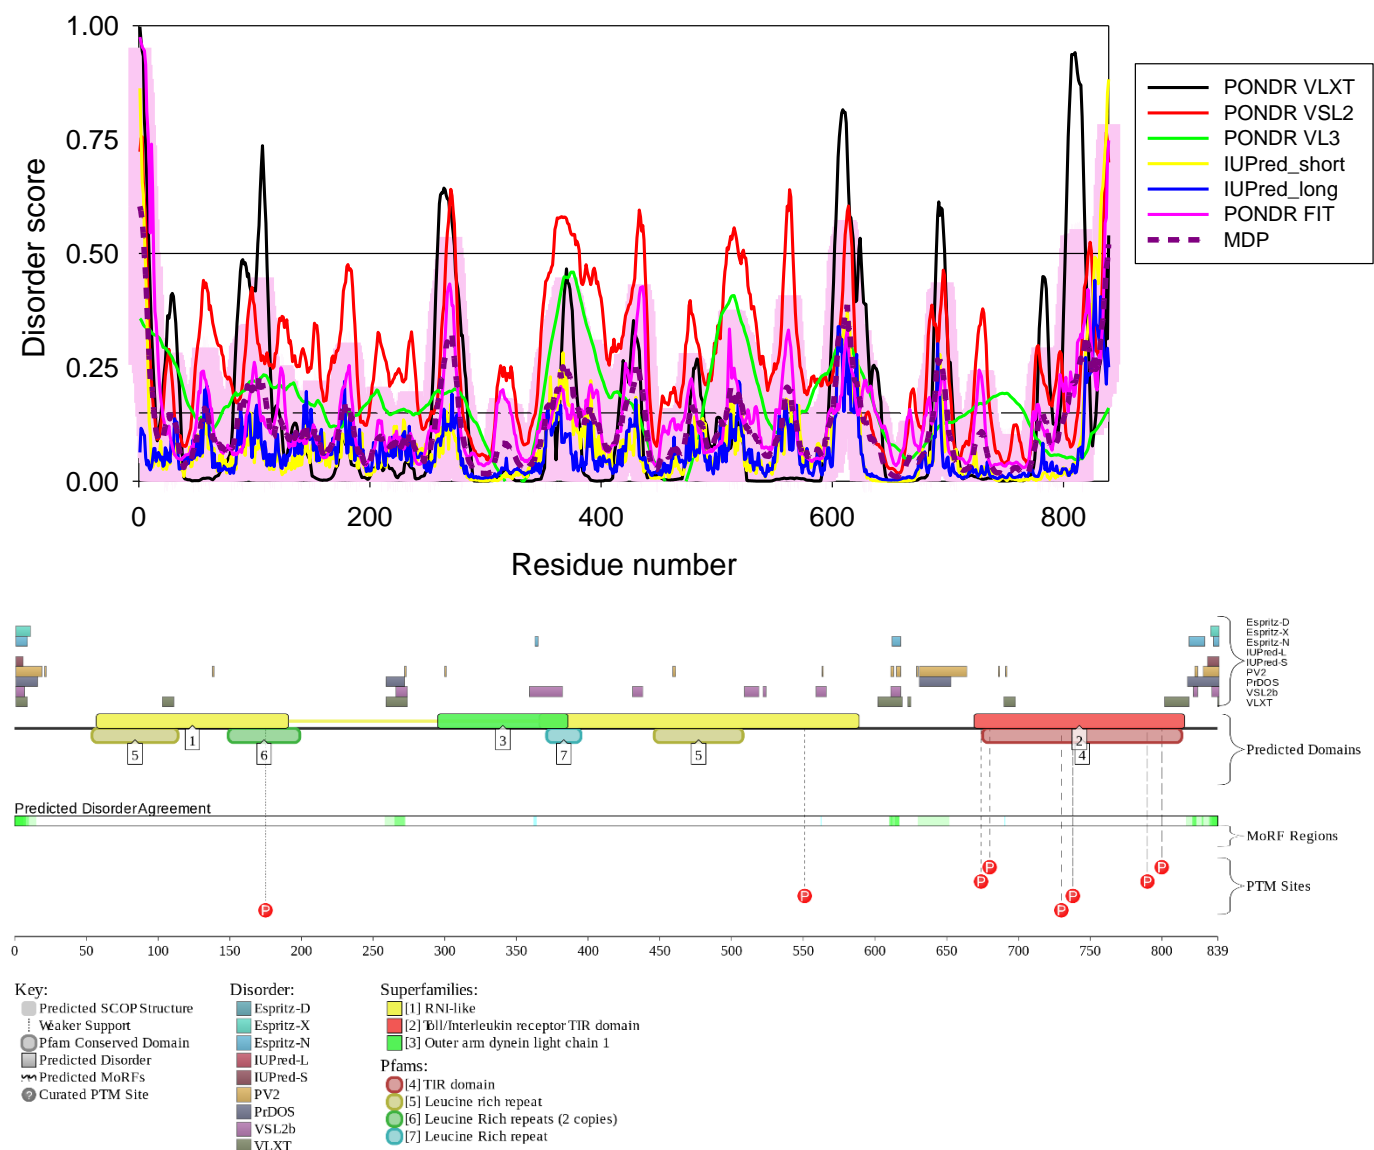

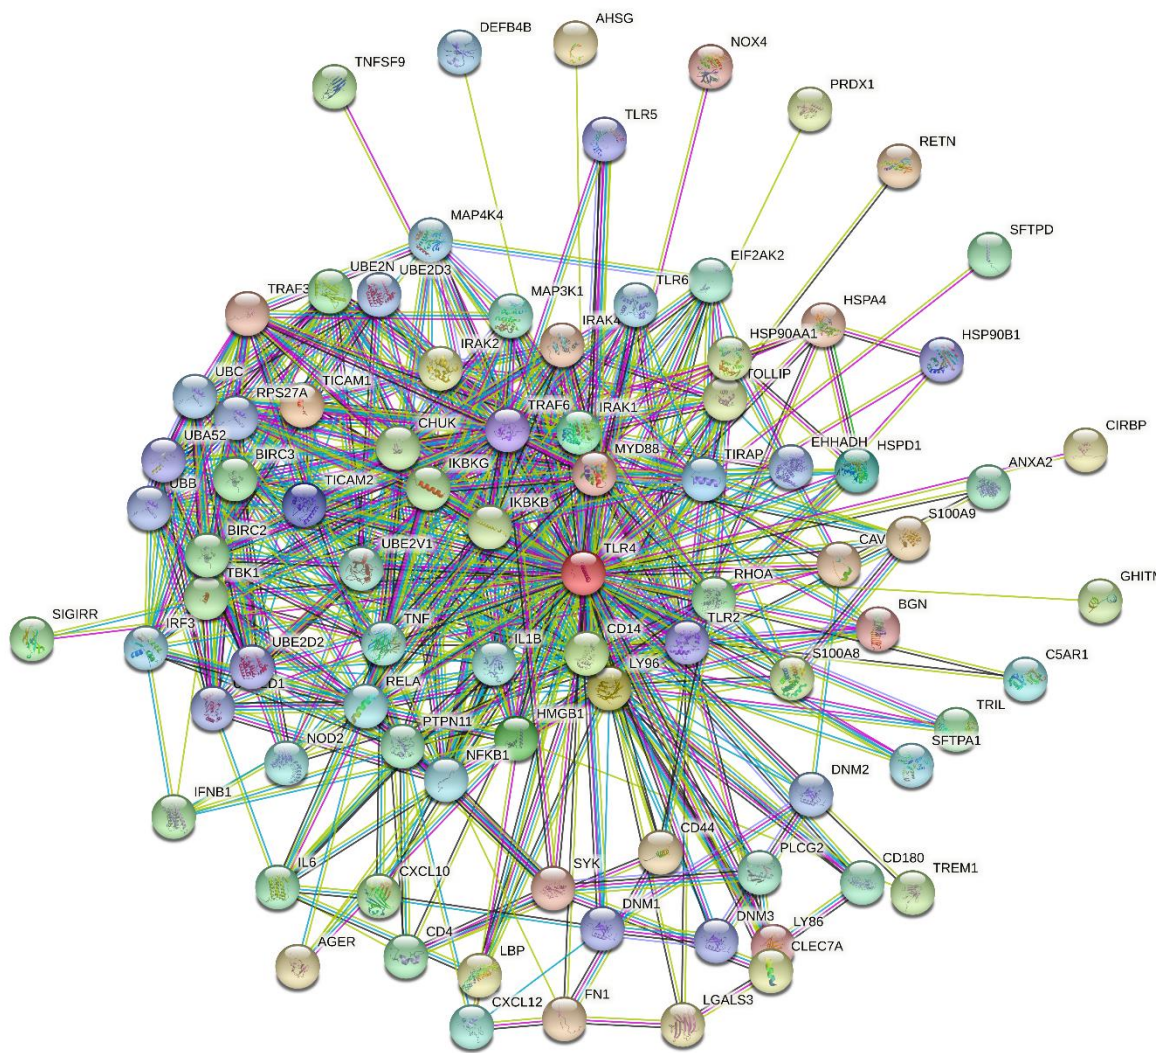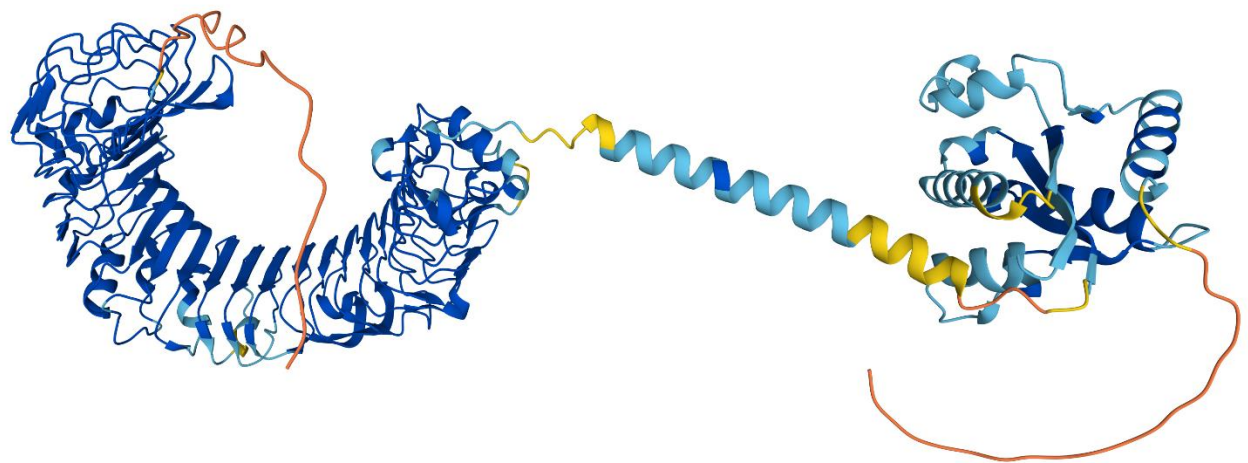

```

>sp|O60602|TLR5_HUMAN Toll-like receptor 5 OS=Homo sapiens OX=9606 GN=TLR5 PE=1 SV=4
MGDHLDLLLGVLVLMAGPVFGIPSCSFDGRIAFYRFCNLTVQVPQVLNTERLLLSFNYIRTVTASSFPFLEQLQLLELGSQYTPLT
IDKEAFRNLPNLRILDLGSSKIYFLHPDAFQGLFHLFELRLYFCGLSDAVLKDG YFRNLKALTRLDLSKNQIRSLYLHPSFGKLN
SLKSIDFSSNQIFLVCEHELEPLQGKTLSSFFSLAANSLSYRSVSDWGKCMNPFNMVLEILDVSGNGWTVDTGNFSNAISKSQA
FSLILAHHIMGAGFGFHNIDKDPDQNTFAGLARSSVRHLDLSHG VFVSLNSRVFETLKD LKVLNLAYNKINKIAD EAFYGLDNLQV
LNLSYNLLGELYSSNFYGLPKVAYIDLQKNHIAIIQDQTFKFLEKLQTLDLRDNALTTIHFIPIPDIFLSGNKLVLTLPKINLTA
NLIHLSNRLENLDILYFLLRVPHLQILILNQNRFS SCSDQTPSENPSLEQLFLGENMLQLAWETELCWDVFEGLSHLQVLYLN
HNYLNSLPPGVFSLHTALRGLSLNSNRLTVLSHNDLPANLEILDISR NQLLAPNPDV FVSVLSVLDITHNKFICECELSTFINWLN
HTNVTIAGPPADIYCVYPDSFSGVSLFSLSTEGCDEEEVLKSLKFSLFIVCTVTLTLFLMTILT VTKFRGFCFICYKTAQR L VFK
DHPQGTEPD MYKYDAYLCFSSKDFTWVQNALLKHLDTQYS DQNRFNLCFEERDFVPGENRIANIQDAIWN SRKIVCLVSRHFLRD
GWCLEAFSYAQGRCLSDLNSALIMVVVGSLSQYQLMKHQSI RGFVQKQQYLRWPEDFQDVGWFLHKLSQQILKKEKEKKKDN NIP
LQTVATIS

```

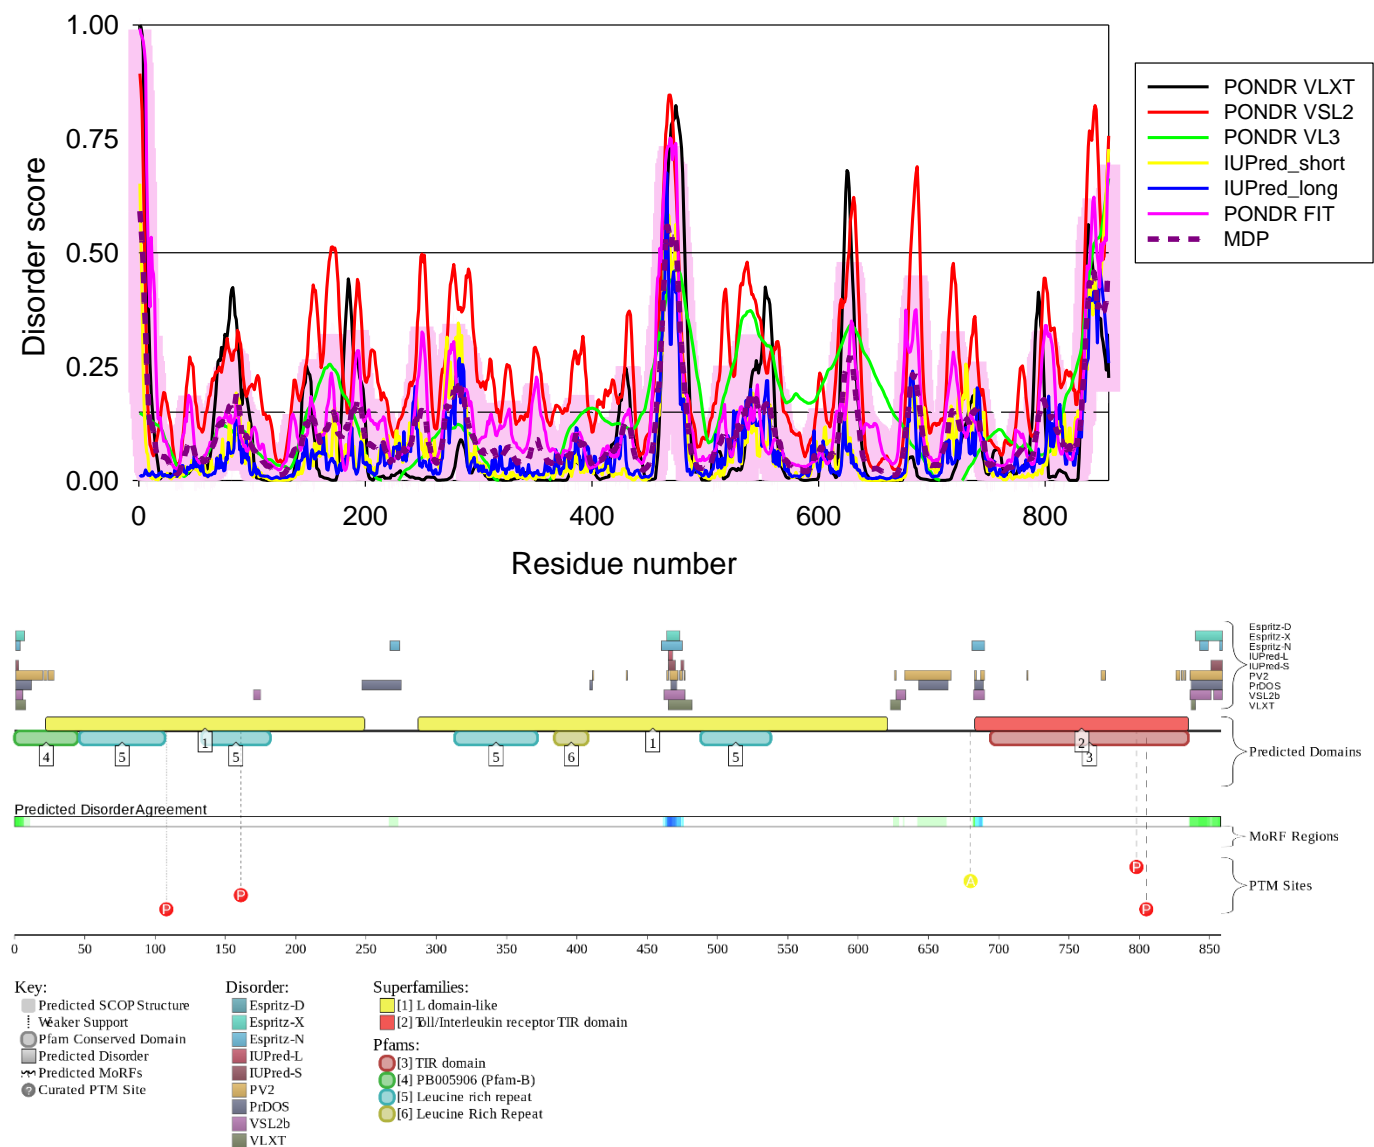



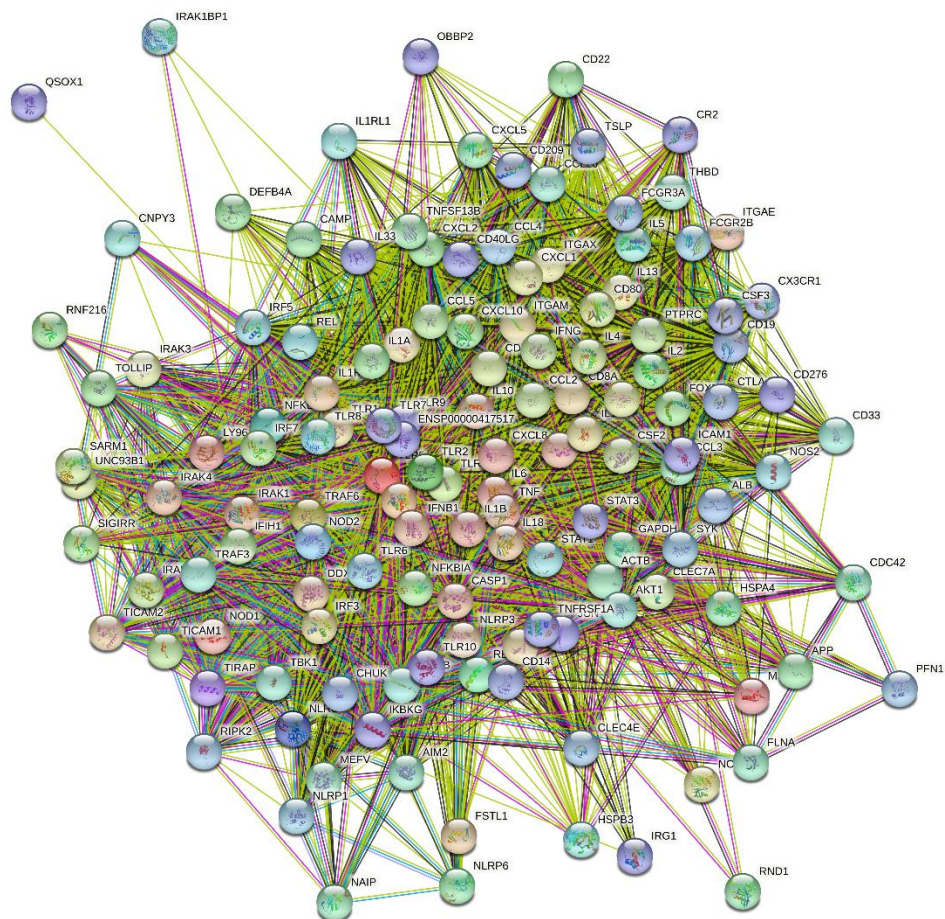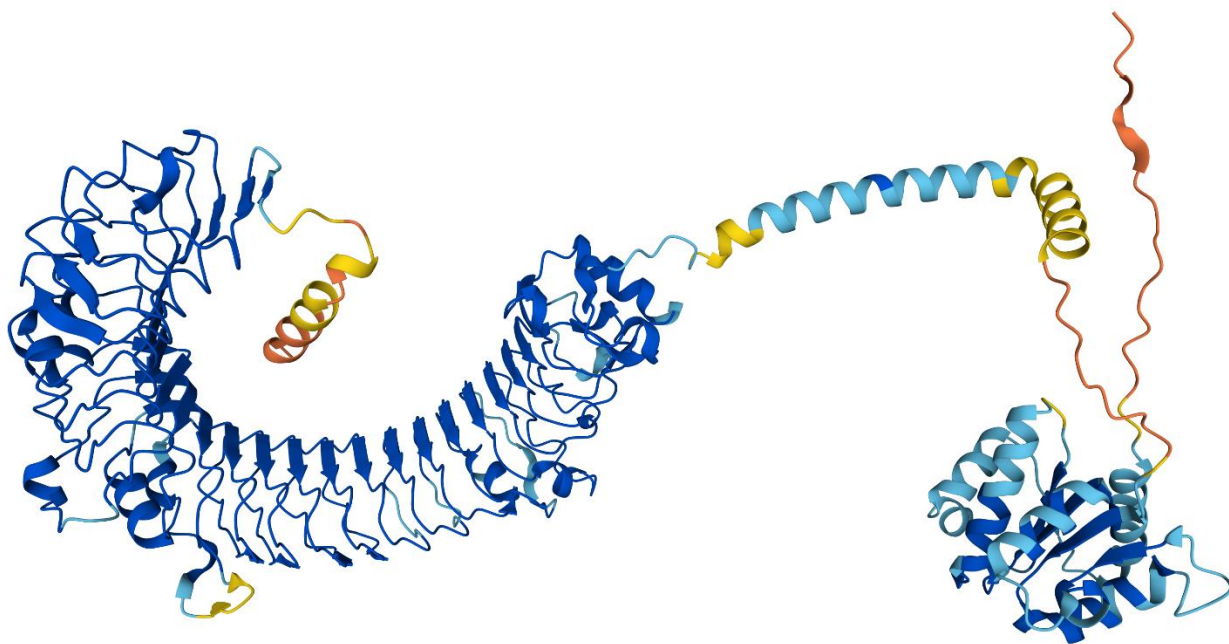

```
>sp|Q9Y2C9|TLR6_HUMAN Toll-like receptor 6 OS=Homo sapiens OX=9606 GN=TLR6 PE=1 SV=2
MTKDKKEPIVKS FHFVCLMIIIVGTRI QFS DGN EFAVDKSKRGLIHVPKDLPLKTKVLDMSQNYIAELQVSDMSFLSELT VLR LSH
NRIQLLDLSVFKFNQDLEYLDLSHNQLQKISCHPIVSFRHLDLSFNDFKALPICKEFGNLSQLNFLGLSAMKLQKLDLLPIAHLH
LSYILLDLRNYIYIKENETESLQILNAKTLHLVFHPTSLFAIQVNISVNTLGCLQLTNIKLNDNCQVFIKFLSELTRGSTLLNFT
LNHIETTWKCLVRVVFQFLWPKPVEYLNINLTIIIESIREEDFTYSKTTLKALTIEHITNQVFLFSQTALYTVFSEMNMMLTISD
TPFIHMLCPHAPSTFKFLNFTQNVFTDSIFEKCS TLVKLET LILQKNGLKDLFKVGLMTKDMPSLEILDVSWNSLESGRHKENCT
WVESIVVLNLSSNMLTDSVFRCLPPRIKVLDLHSNKIKSVPKQVVKLEALQELNVAFNSLTDLPGCGSFSSLSVLIIDHNSVSH
SADFFQSCQKMRSIKAGDNPFQCTCELREFVKNIDQVSSEVLEGWPD SYKCDY P ESYRGSPLKDFHMSSELSCNITLLIVTIGATM
LVLAVTVTSLCIYLDLPWYLRMVCQWTQTRRRARNIPLLEELQRNLQFHAFISYSEHDSAWVKSELVPYLEKEDIQICLHERNFVP
GKSIVENIINCIEKSYKSIFVLSPNFVQSEWCHYELYFAHHNLFHEGSGNNLILILLEPIPQNSIPNKYHKLKALMTQRTYLQWPK
EKS K RGLFWANIRAAAFNMKLT LVTENNDVKS
```

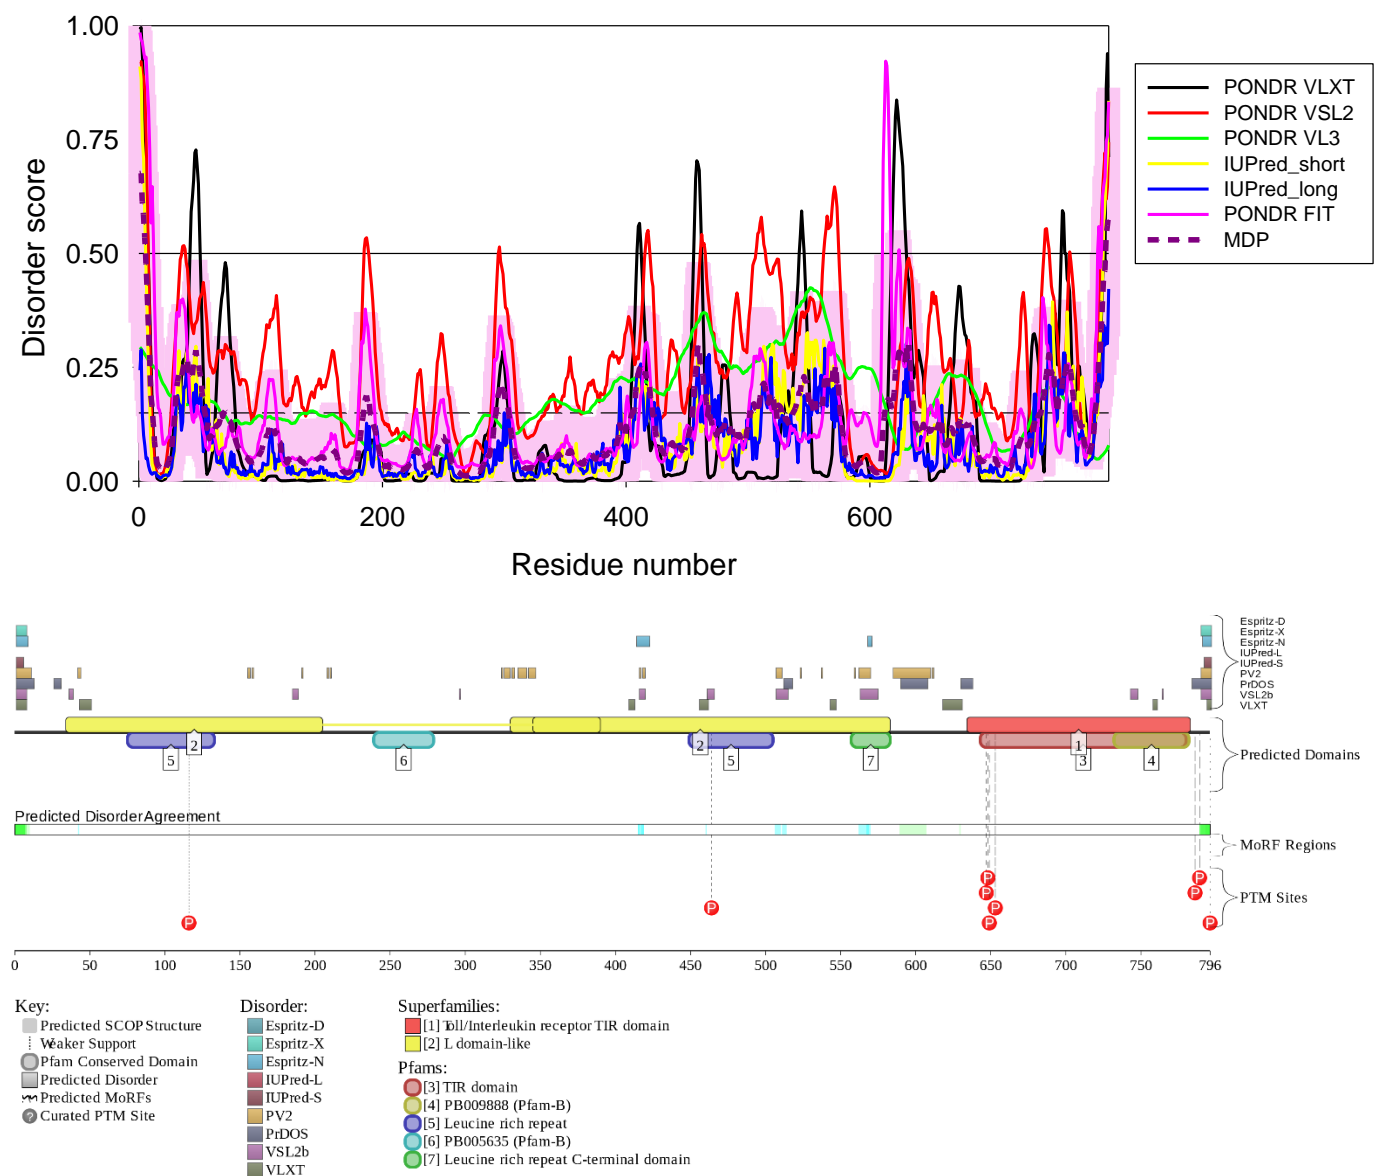



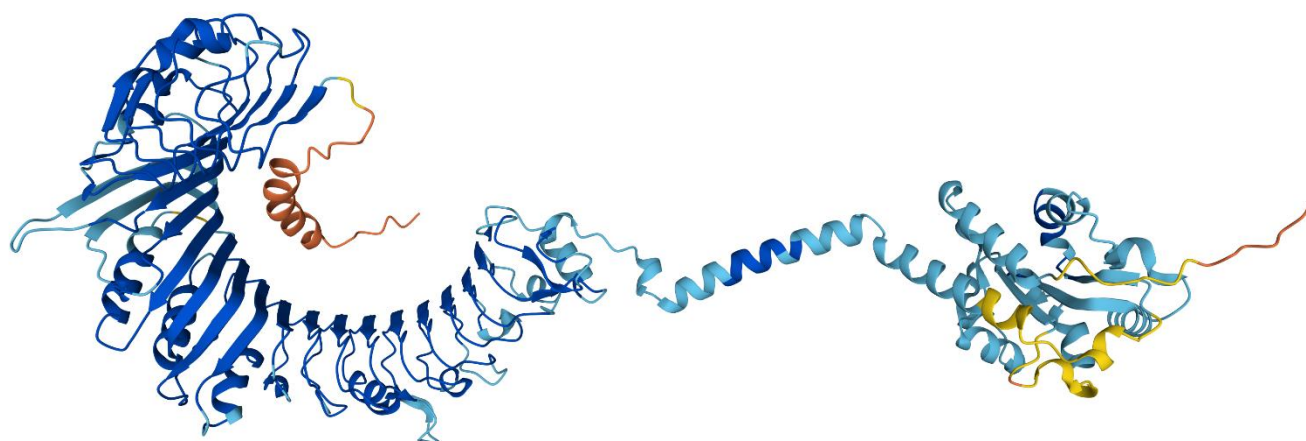

```

>sp|Q9NYK1|TLR7_HUMAN Toll-like receptor 7 OS=Homo sapiens OX=9606 GN=TLR7 PE=1 SV=1
MVFPMTLKRQILILFNIILISKLLGARWFPKTLPCDVTLDVPHNHVIVDCTDKHLTEIPGGIPTNTTNTLTINHIPDISPASF
HRLDHLVEIDFRNCNCPVPIPLGSKNNMICIKRLQIKPRSFSGLTYLKSLYLDGNQLLEIPQGLPPSLQLLSLEANNIFSIRKENLTE
LANIEILYLGQNCYRNPICYVSYSIEKDAFLNLTCLKVLSLKDNVNTAVPTVLPSTLTELYLYNNMIAKIQEDDFNNLNQLQILD
LSGNCPRCYNAPFPAPCKNNSPLQIPVNAFDALTELKVLRLHSNSLQHVPPRWFKNINKLQELDLSQNF LAKEIGDAKFLHFLP
SLIQDLDSFNLFELQVYRASMNLSQAFSSLSKILIRIGYVFKEKLSFNLSPLHNLQNLEVLDTGTNFIKIANLSMFKQFKRLKV
IDLSVNKISPSGDSSEVGFCNARTSVESYEPQVLEQLHYFRYDKYARSCRFKNKEASFMSVNESCYKYGQTLDSLKNSIFFVKS
SDFQHLSTFLKCLNLSGNLISQTLNGSEFQPLAELRYLDFSNRLDLLHSTAFEELHKLEVLDISSNSHYFQSEGITHMLNFTKNL
KVLQKLMMDNDISSSTSRMTSESLRTELEFRGNHLDVLWREGDNRYLQLFKNLLKLEELDISKNLSFLPSGVFDGMPPNLKNL
SLAKNGLKSFWSKKLQCLKNLETLDSLHNQLTTVPERLSNCSRSLSKNLILKNNQIRSLTKYFLQDAFQLRYLDLSSNKIQMIQKT
SFPENVLNNLKMLLLHHNRFLCTCDAVWFVWVNHTTEVTIPYLATDVTVCVGPAGHKQSVISLDLYTCELDLTNLILFSLISVS
LFLMVMMTASHLYFWDVWYIYHFCKAKIKGYQRLISPDCCYDAFIVYDTKDPVTEWVLAELVAKLEDPREKHFNLCEERDWLP
GQPVLENLSQSIQLSKKTVMFMTDKYAKTENFKIAFYLSHQRLMDEKVDVILIFLEKPFQKSKFLQLRKRLCGSSVLEWPTNPQ
AHPYFWQCLKNALATDNHVAYSQVFKETV

```

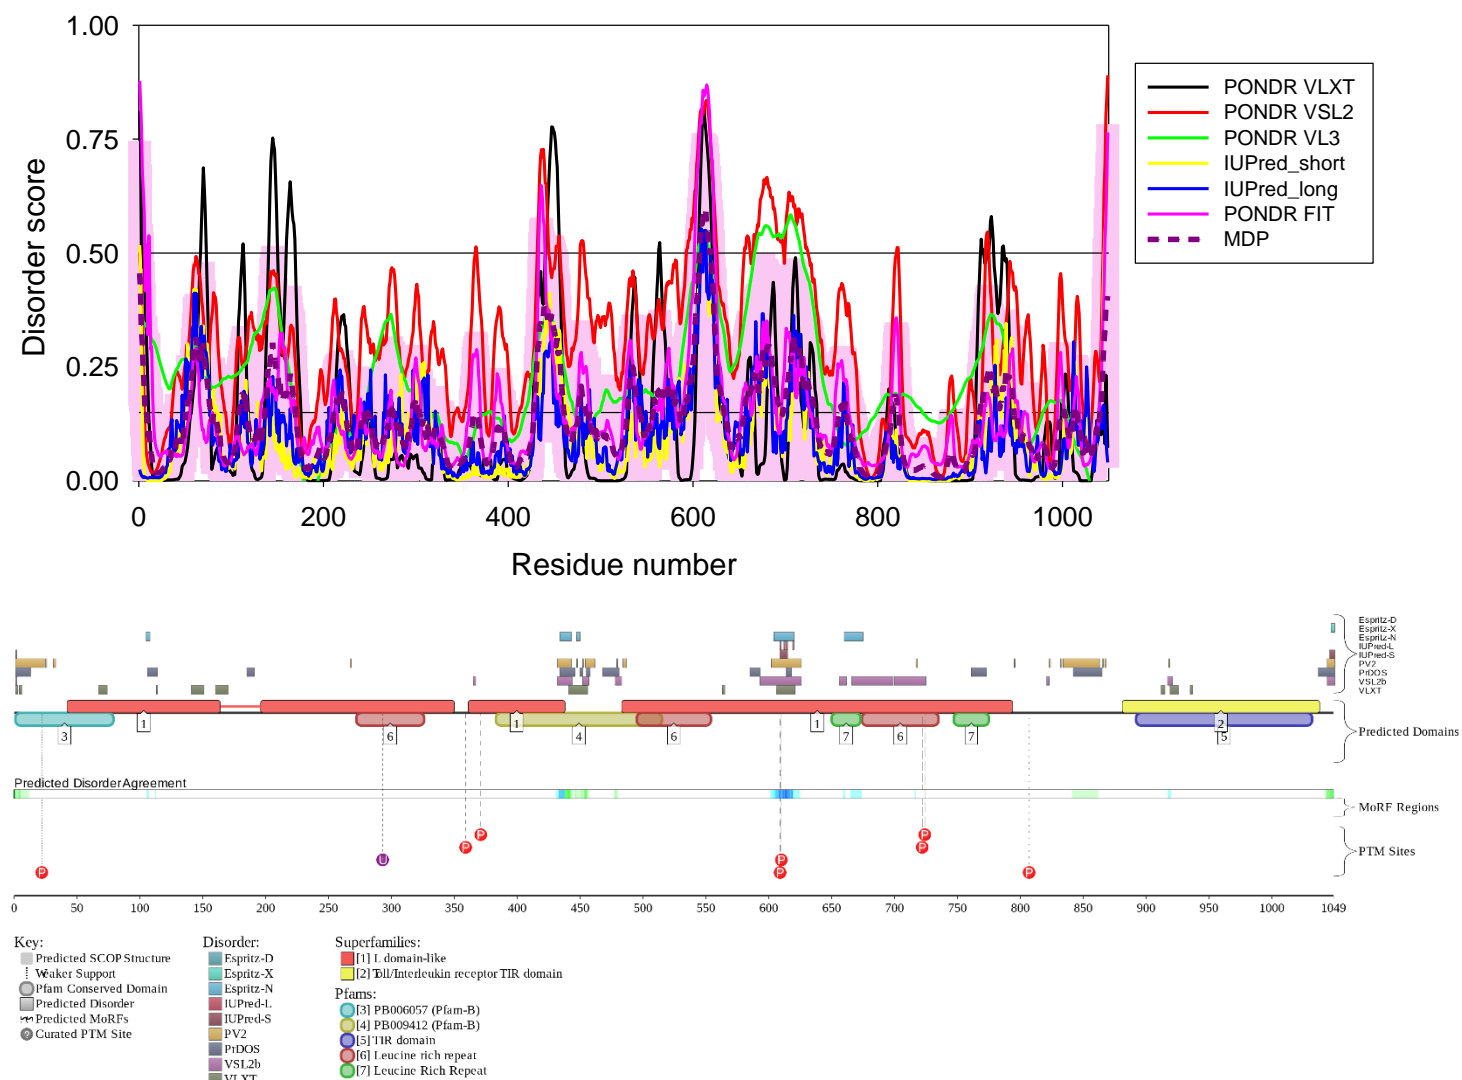



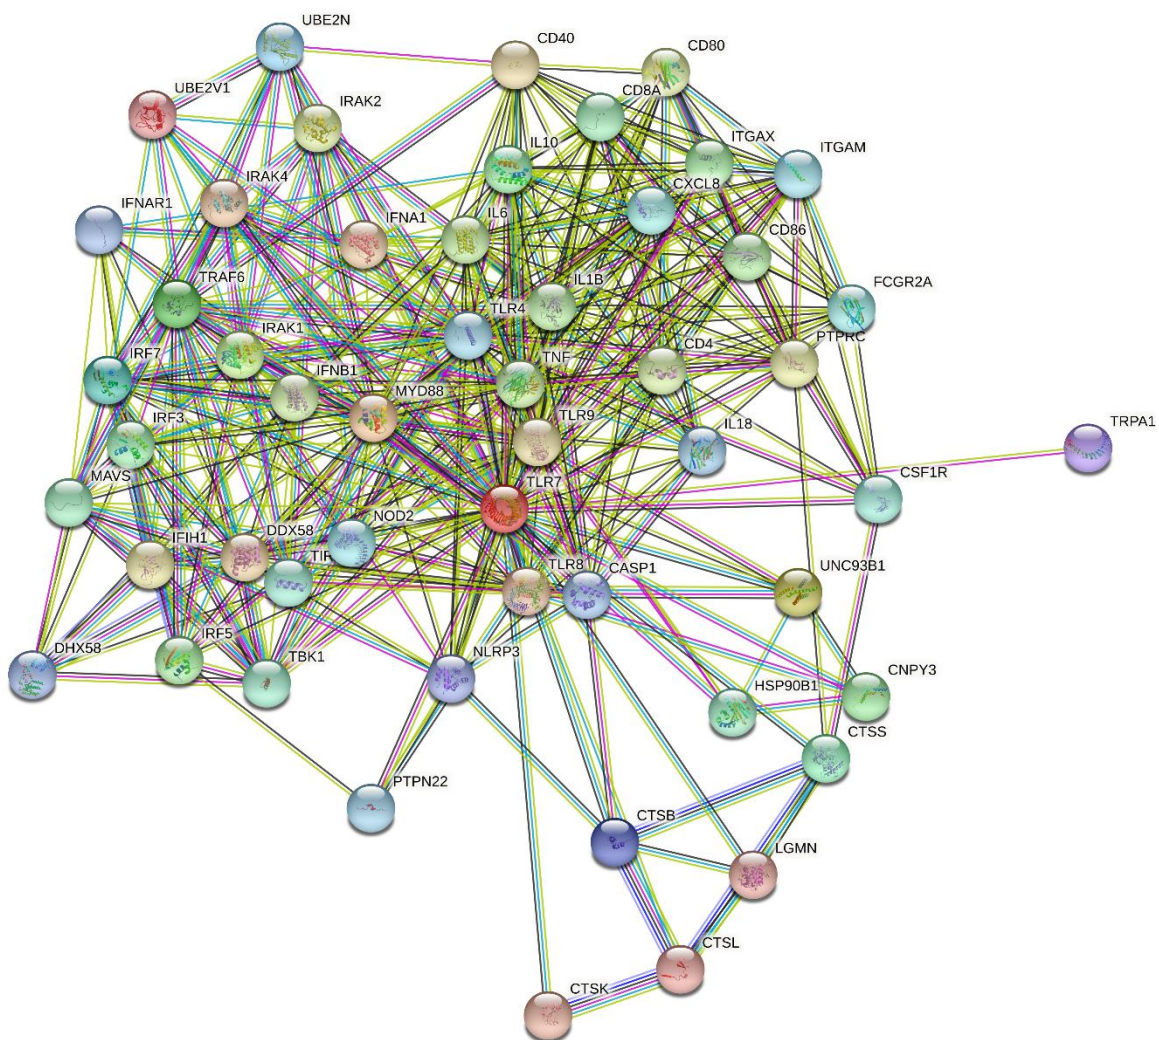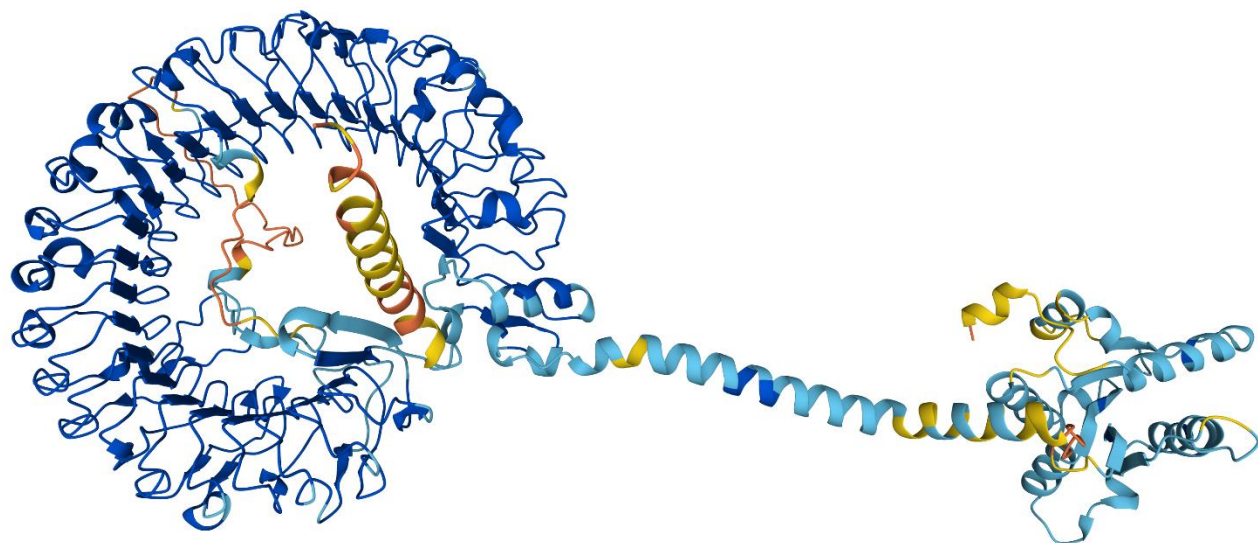

```
>sp|Q9NR97|TLR8_HUMAN Toll-like receptor 8 OS=Homo sapiens OX=9606 GN=TLR8 PE=1 SV=1
MENMFLQSSMLTCIFLLISGSCELCAEENFSRSYPCDEKKQNDSVIAECSNRRLQEVPPQTVGKYVTELDLSDNFITHITNESFQG
LQNLTKINLNHNPNVQHONGNPGIQSNGLNITDGAFLNLKLNRELLLEDNQLPQIPSGLPESLTELSQLNNIYNITKEGISRLI
NLKNLYLAWNCYFNKVCEKTNIEDGVFETLTNLELLSLSFNSLSHVPPKLPSSLRKLFSLNTQIKYISEEDFKGLINLTLLDLG
NCPRCFNAPFPCVPCDGGASINIDRFAFQNLTLQLRYLNLSSTSLRKINAAWFKNMPHLKVLDLEFNLYLVEIASGAFLTMLPRLE
ILDLSFNLIKGSYPQHINISRNFSKLLSLRALHLRGYVFQELREDDFQPLMQPLNLSTINLGINFIKQIDFKLFQNFNSLEIIYL
SENRI SPLVKDTRQSYANSSSFQRHIRKRRSTD FEFDPHSNFYHFT RPLIKPQCAAYGKALDLSLSIFFIGPNQFENLPDIACL
NLSANSNAQVLSGTEFSAIPHVKYLDLTNNRLDFDNASALTELSDEVLDSLNSHYFRIAGVTHHLEFIQNFTNLKVLNLSHNN
IYTLTDKYNLESKSLVELVFSGNRLDILWNDDDNRYISIFKGLKNLTRLDLNLRLKHIPNEAFLNLPASLTELHINDNMLKFFN
WTL LQQFPRLLELLDLRGNKLLFLTDLSLSDFTSSRLTLLLSHNRISHLPSGFLSEVSSSLKHLDLSSNLLKTINKSALETKT TTKLS
MLELHG NPFECTCDIGDFRRWMDEHLNVKIPRLVDVICASPGDQRGKSIVSLELTTCVSDVTAVILFFFTFFITTMVLAALAH
LFYWDVWFIYNVCLAKVKGRSLSTSQTfyDAYISYDTKDASVTDWVINELRYHLEESRDKNVLLCLEERDWDPLGLAIDNLMQS
INQSKKTVFVLTKKYAKSWNFKTA FYLALQRLMDENMDVIFILLEPVLQHSQYLRLRQRICKSSILQWPDNPKAEGFLWQTLRN
VVL TENDSRYNMYVDSIKQY
```

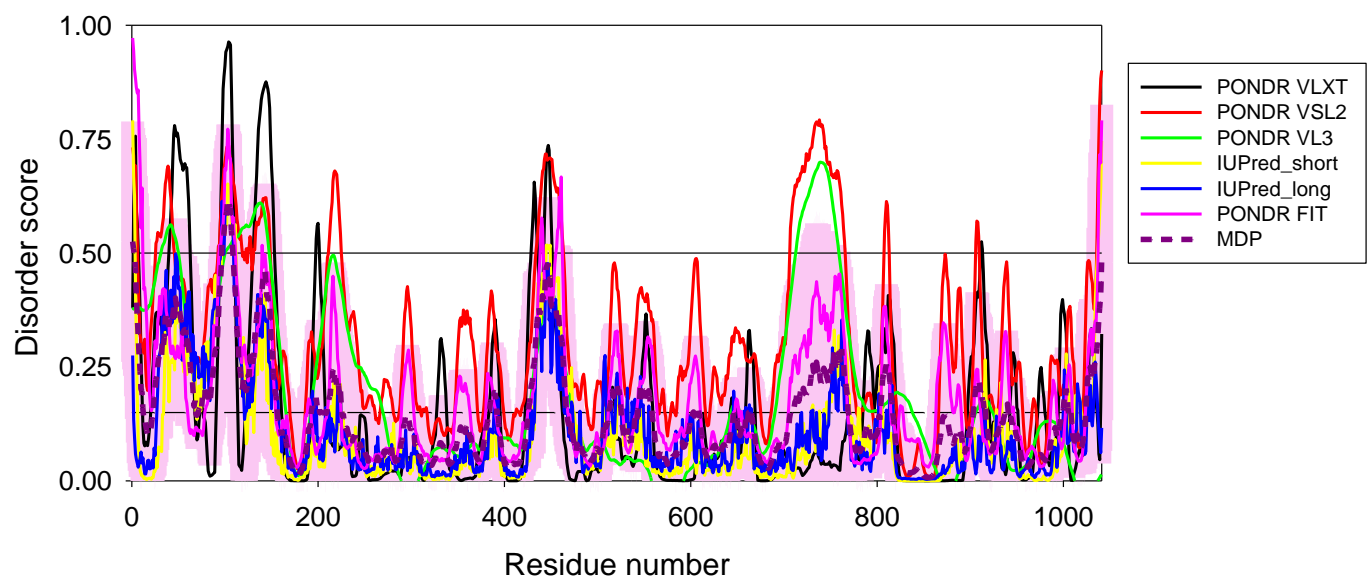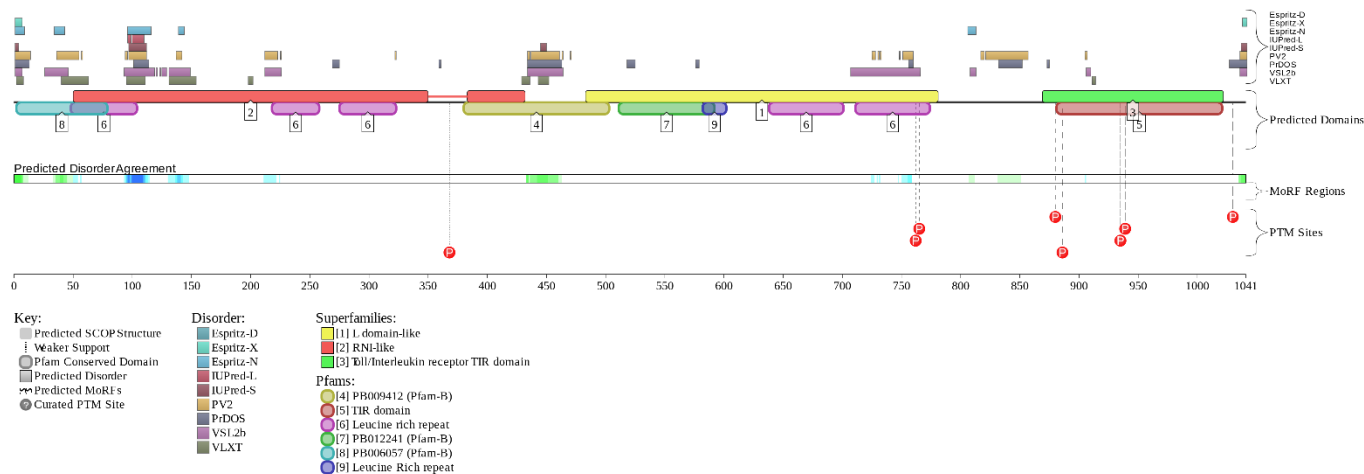

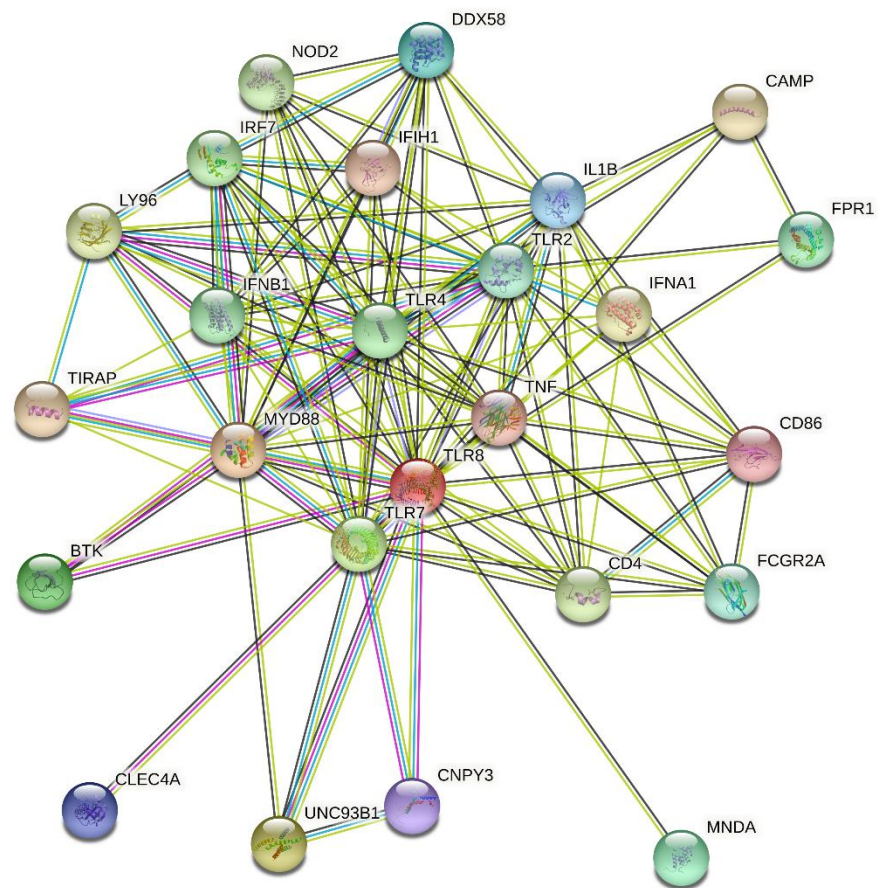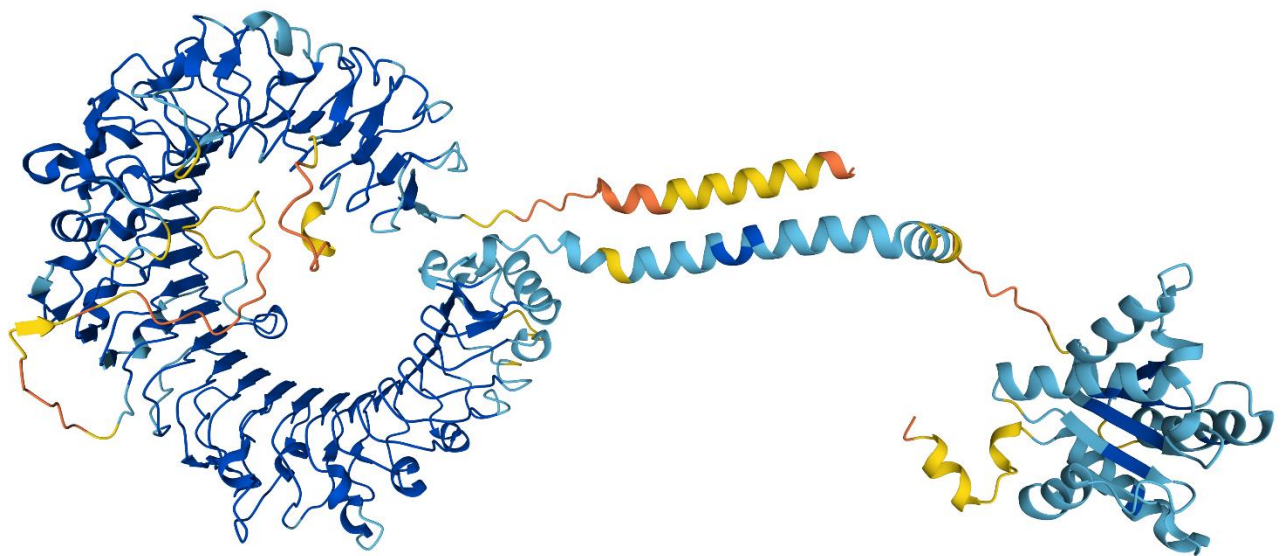



```

>sp|Q9NR96|TLR9_HUMAN Toll-like receptor 9 OS=Homo sapiens OX=9606 GN=TLR9 PE=1 SV=2
MGFCRSALHPLSLVQAIMLAMTLALGTLPAFLPCELQPHGLVNCNWLFLKSVPHFSMAAPRGNVTSLSLSSNRIHHLHDSDFAH
LPSLRHLNLKWNCPVGLSPMHFPCMTIEPSTFLAVPTLEELNLSYNNIMTVPALPKSLISLSLSHTNIMLDSASLAGLHALR
FLFMDGNCYYKNPCRQALEVAPGALLGLGNLTHLSLKYNNTLVVPRNLPSSLEYLLLSYNRIVKLAPEDLANLTALRVLDVGGNC
RRCDHAPNPMCMECPRHFPQLHPDTFSSHLSRLEGLVLKDSLSWLNASWFRGLGNLRVLDLSENFYKCI TKTKAFQGLTQLRKLN
LSFNYQKRVSFAHLSLAPSFGLSVALKELDMHGIFFRSLDETTLRPLARLPMQLTLRLQMNFINQAQLGIFRAFPGLRYVDLSDN
RISGASELTATMGEADGGEKVWLQPGDLAPAPVDTFSSSEDFRPNCSLTNFTLDLSRNNLVTVQPEMFAQLSHLQCLRLSHNCISQ
AVNGSQFLPLTGLQVLDLSHNKLDLYHEHSFTLPRLEALDLSYNSQPFQMVGHNFSFVAHLRRTLRLHLSLAHNNIHSQVSQQL
CSTSLRALDFSGNALGHMWAEGDLYLHFFQGLSGLIWLDLSONRLHTLLPQTLRNLPKSLQVLRRLRDNYLAFFKWWSLHFLPKLE
VLDLAGNQKALTNGSLPAGTRLRRLDVSCNSISFVAPGFFSKAKELRELNLSANALKTVDSWFGPLASALQILDVSANPLHCA
CGAAMDFLLEVQAAPVGLPSRVKCGSPGQLQGLSIFAQDLRLCLDEALSWDCAFSLSLAVALGLGVPMHLHLCGWDLYWCFHLC
LAWLPWRGRQSGRDEDALPYDAFVVFDKTQSAVADWVYNELRGQLEECRGRWALRLCLEERDWLPGKTLFENLWASVYGSRKTLF
VLAHTDRVSGLLRASFLLAQQRLLEDKDVVVLVILSPDGRRSRYVRLRQRLCRQSVLLWPHQPSGQRSFWAQLGMALTRDNHFF
YNNRFCQGPTAE

```

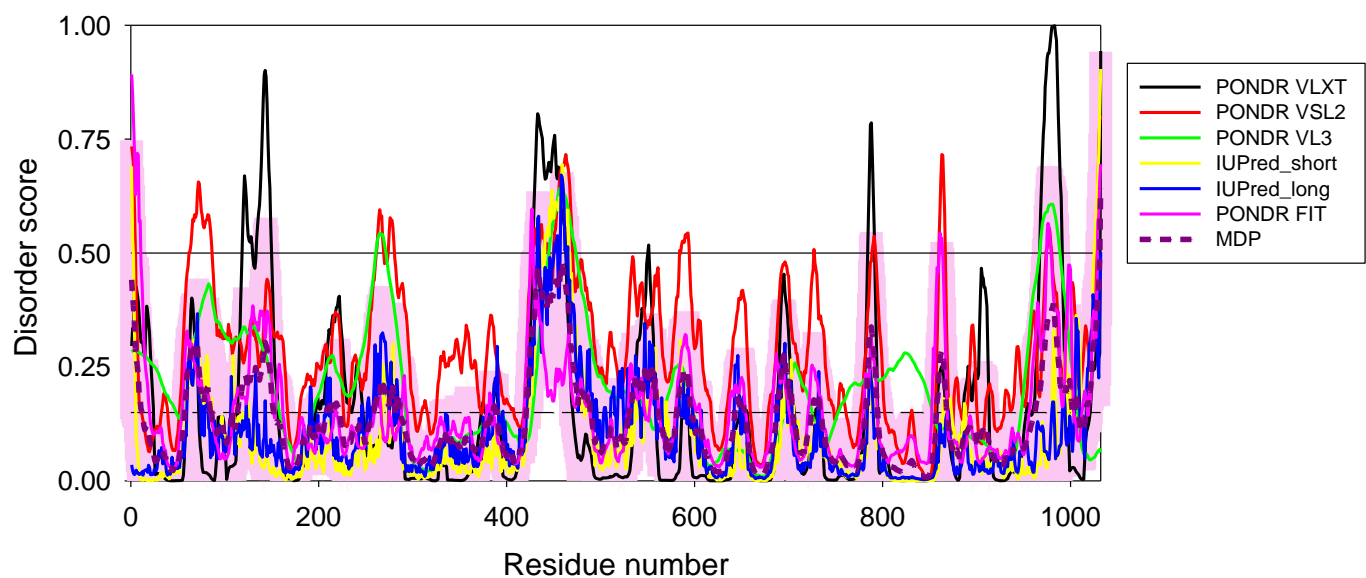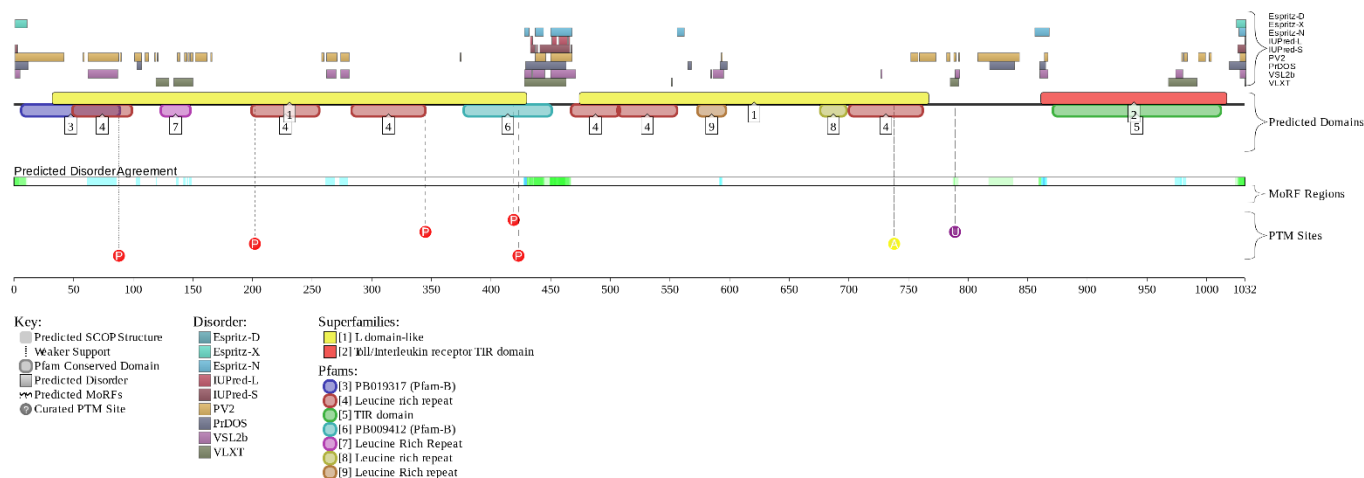

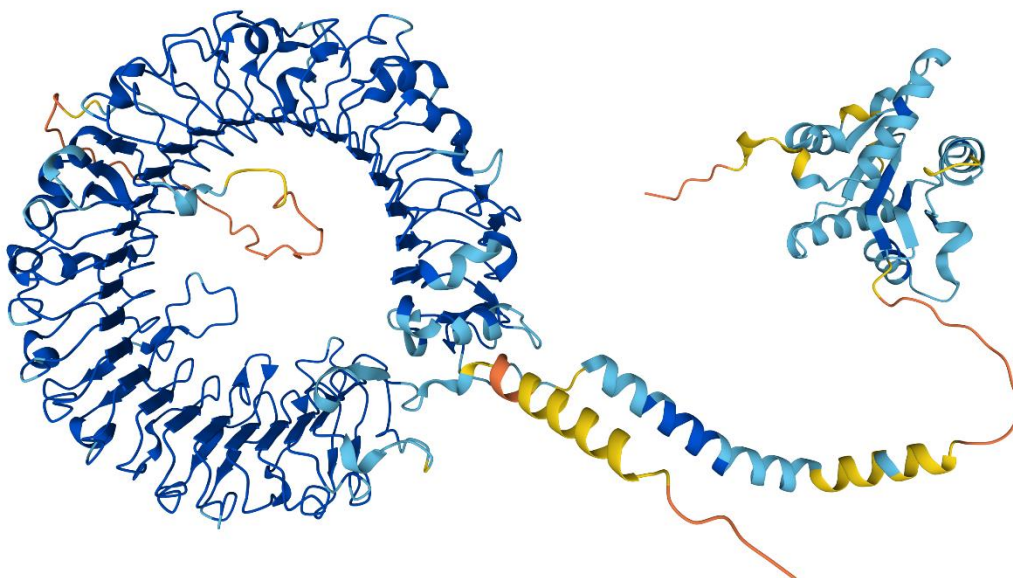

```
>sp|Q9BXR5|TLR10_HUMAN Toll-like receptor 10 OS=Homo sapiens OX=9606 GN=TLR10 PE=1
SV=2
MRLIRNIYIFCSIVMTAEGDAPELPEERELMTNCSNMSLRKVPADLTPATTTLDLSYNLLFQLQSSDFHVSVKLRVLILCHNRIO
QLDLKTFEFNKELRYLDLSNNRLKSVTWYLLAGRLYLDLSFNDFDTPMICEEAGNMSHLEILGLSGAKIQKSDFKIAHLHLNTV
FLGFRTLPHYEEGSLPILNTTKLHIVLPMDTNFWVLLRDGIKTSKILEMTNIDGKSQFVSYEMQRNLSLENAKTSVLLLNKVDLL
WDDLFLILQFVWHTSVEHFQIRNVTFGGKAYLDHNSFDYSNTVMRTIKLEHVHFRVFIYIQDKIYLLLTAKMDIENLTISNAQMPH
MLFPNYPYTKFQYLNLFANNILTDELFRKTIQLPHLKTILNNGNKLETLSLVSCFANNTPLEHLDLSQLNLLQHKNDENCSPWETVNV
MNLSTYKLSDSVFRCLPKSIQILDNLNNQIQVTPKETIHLMALRELNIAFNFLTDLPGCSEHFSRLSVLNIEMNFILSPSLDFVQS
CQEVKTLNAGRNPFRCTCELKNFIQLETYSEVMVGWSDSYTCEYPLNLRGTRLKDVHLHELSCNTALLIVTIVVIMLVGLAVA
FCCLHFDLPWYLRMLGQCTQTWHRVRKTTQEQLKRNVRFHAFISYSEHDSLWVKNELIPNLEKEDGSILICLYESYFDPGKSISE
NIVSFIEKSYKSIFVLSPNFVQNEWCHYEFYFAHHNLFHENS DHIIILILEPIPFYCIPTRYHKLKALLEKKAYLEWPKDRKCG
LFWANLRAAINVNVLATREMYELQTFTELNEESRGSTISLMRTDCL
```

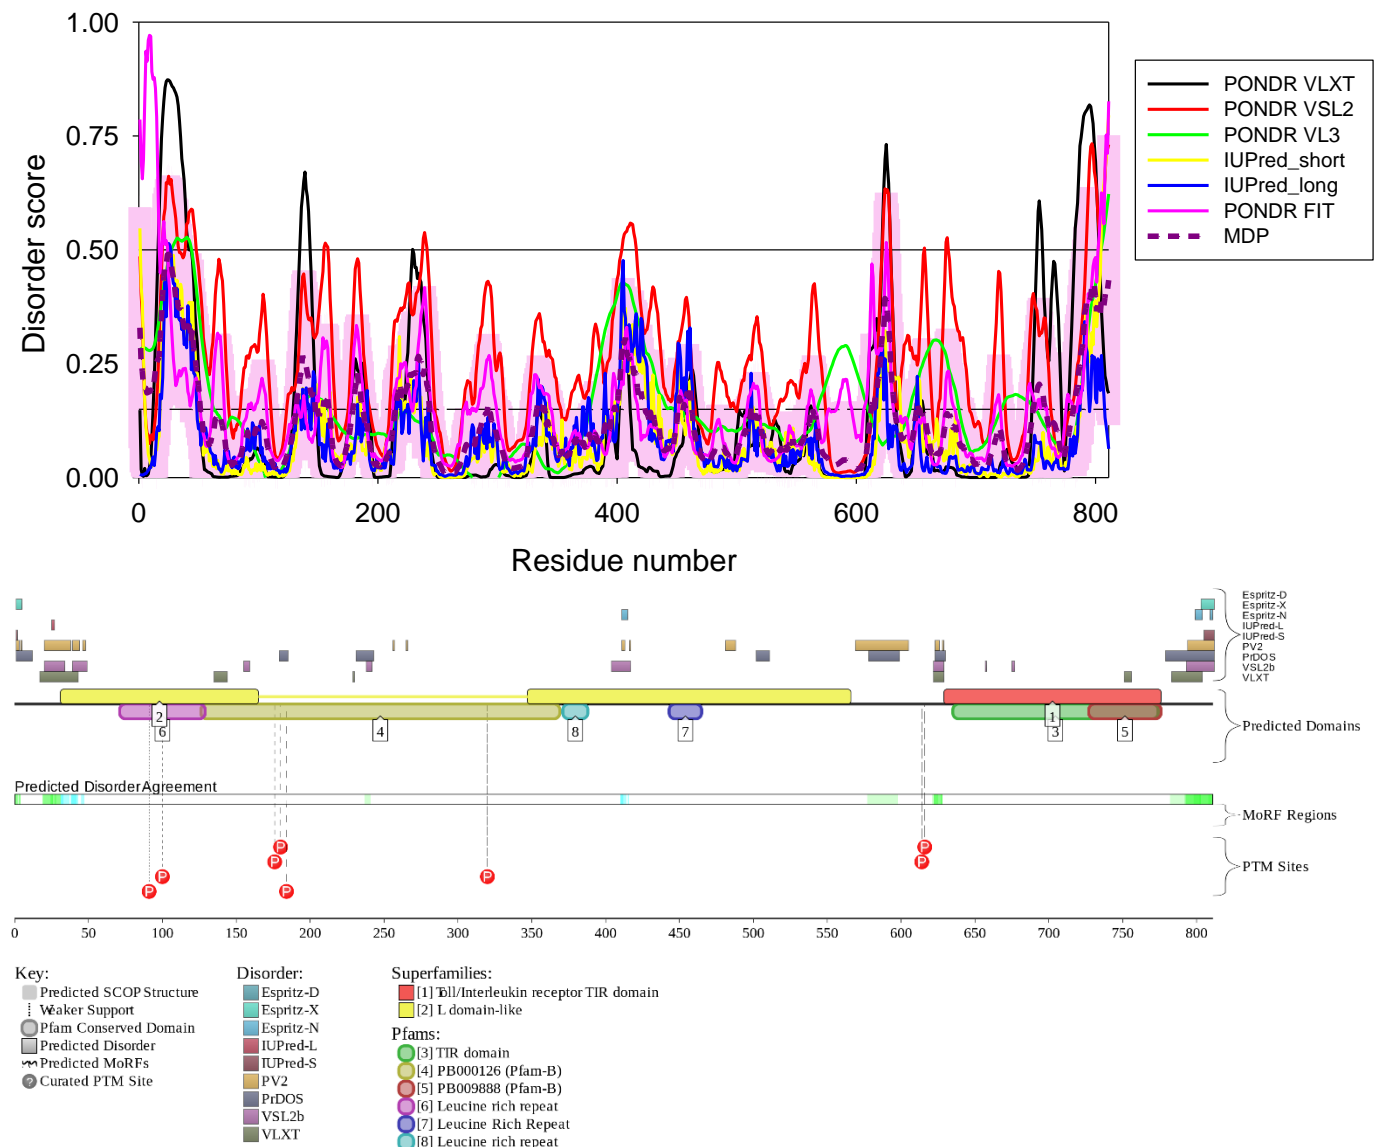





## Proteins in TLR-related signaling pathways

```
>sp|P58753|TIRAP_HUMAN Toll/interleukin-1 receptor domain-containing adapter protein
OS=Homo sapiens OX=9606 GN=TIRAP PE=1 SV=2
MASSTSLPAPGSRPKKPLGKMADWFRQTLLKKPKKRPNSPESTSSDASQPTSQDSPLPPSLSSVTSPSLPPTHASDSGSSRWSKD
YDVCVCHSEEDLVAAQDLVSYLEGSTASLRCLQLRDATPGGAIVSELQALSSSHCRVLLITPGFLQDPWCKYQMLQALTEAPG
AEGCTIPLLSSGLSRAAYPPELRFMYYVDGRGPDGGFRQVKEAVMRYLQTL
```

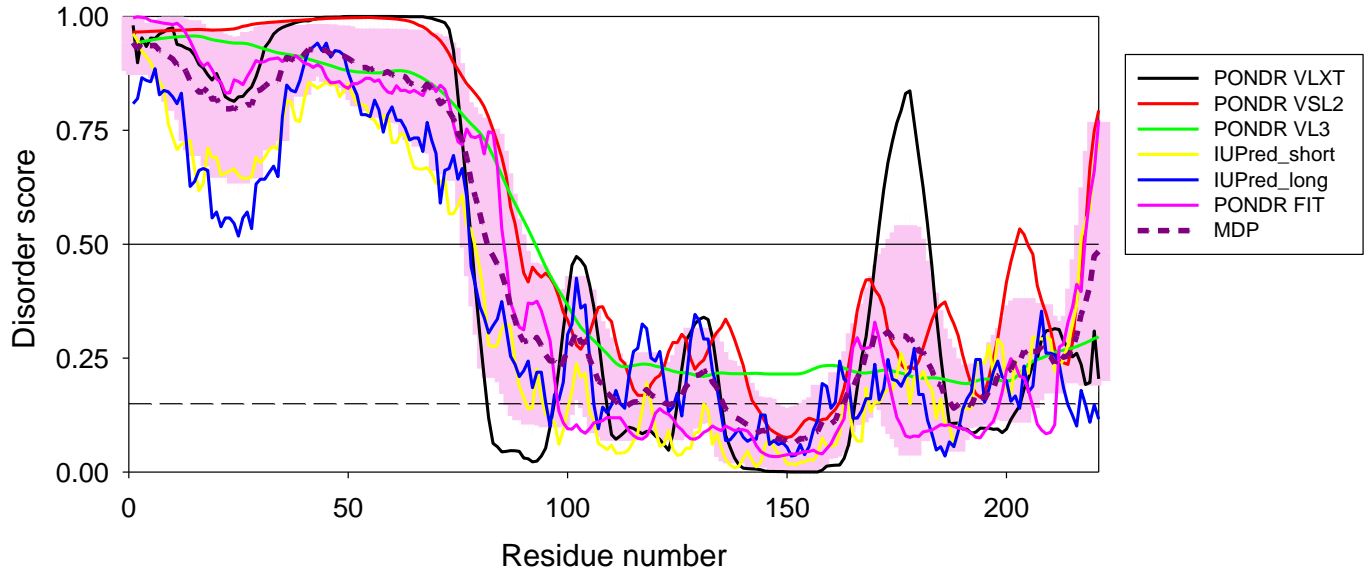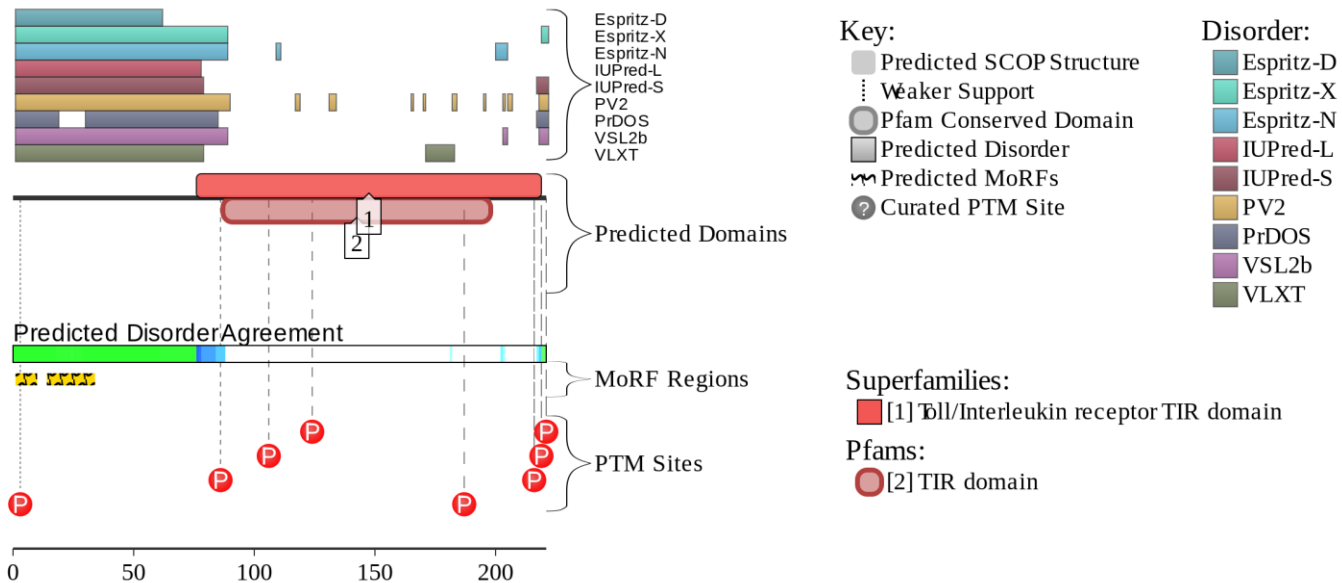

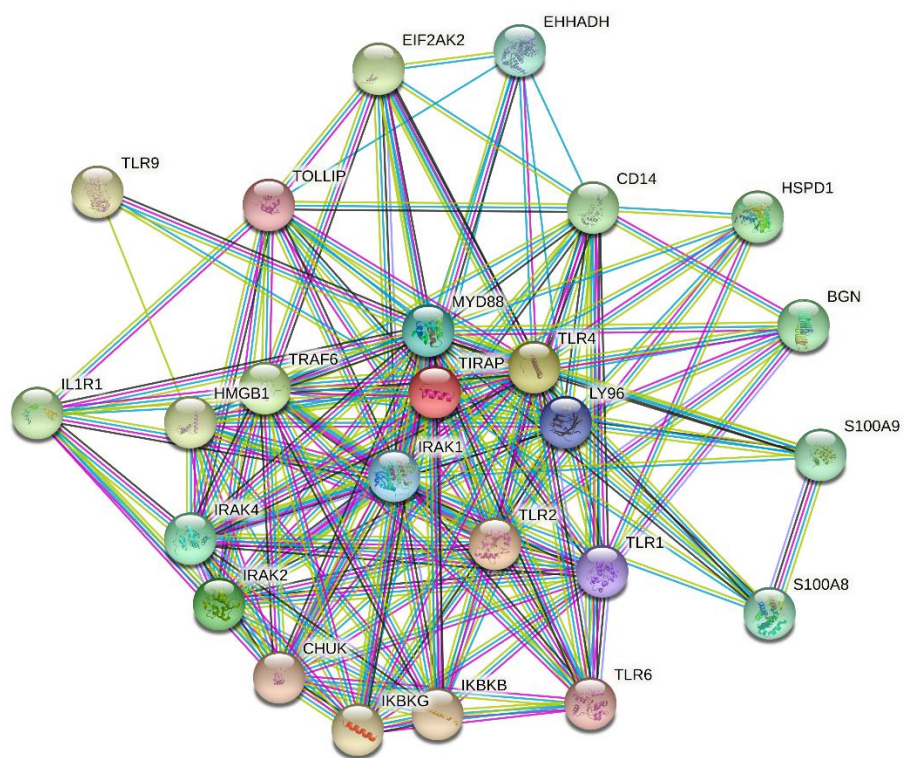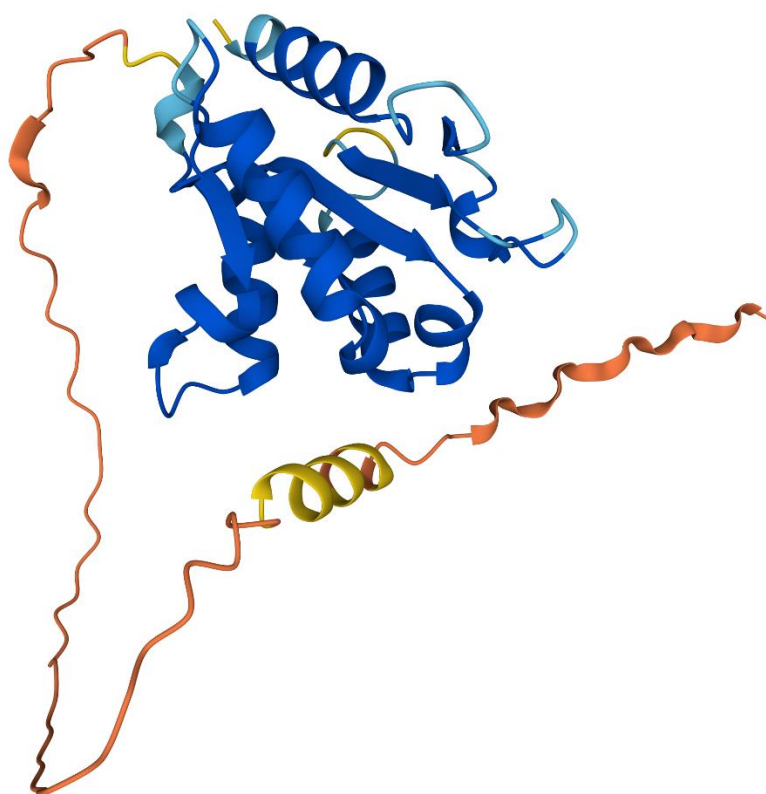

```
>sp|Q99836|MYD88_HUMAN Myeloid differentiation primary response protein MyD88 OS=Homo
sapiens OX=9606 GN=MYD88 PE=1 SV=1
MAAGGPGAGSAAPVSSTSSLPLAALNMRVRRRLSLFLNVRTQVAADWTALAEEMDFEYLEIRQLETQADPTGRLLDAWQGRPGAS
VGRLLLELLTKLGRDDVLLLELGPSTIEEDCQKYILKQQQEEAEKPLQVAAVDSSVPTAELAGITTLDLPLGHMPERFDAFICYCPS
DIQFVQEMIRQLEQTNYRLKLCVSDRDVLPGTCVWSIASELIEKRCRRMVVVSDDYLSKECDFQTKFALSLSPGAHQKRLIPI
KYKAMKKEFPSILRFITVCDYTNPCTKSWFWTRLAKALSLP
```

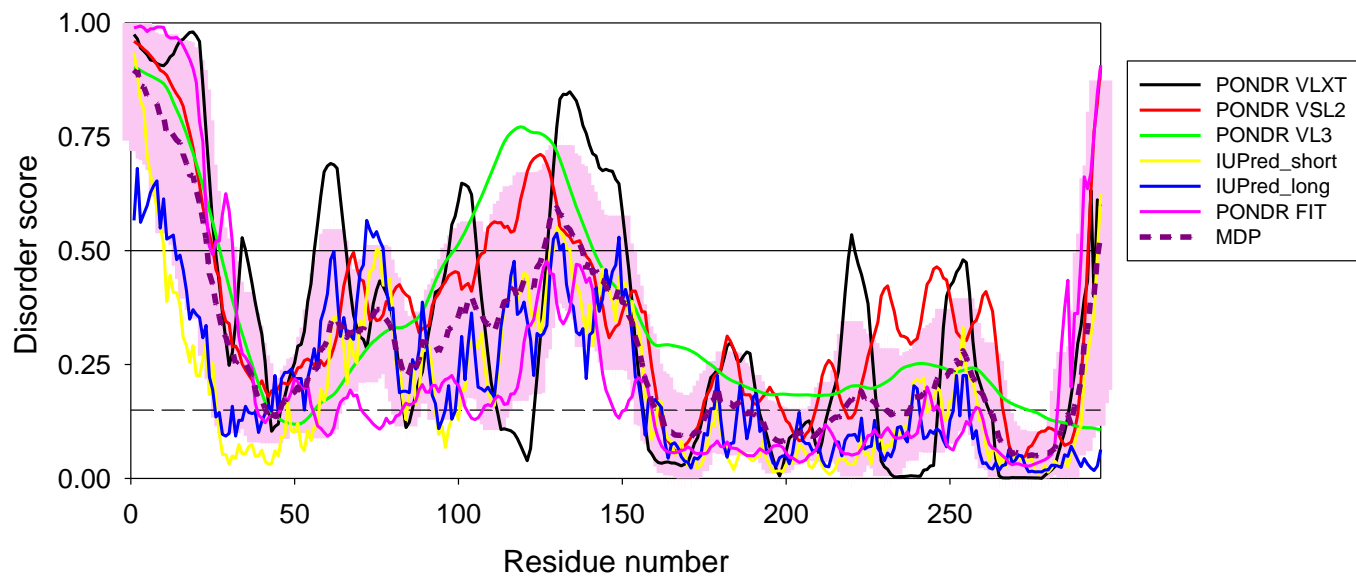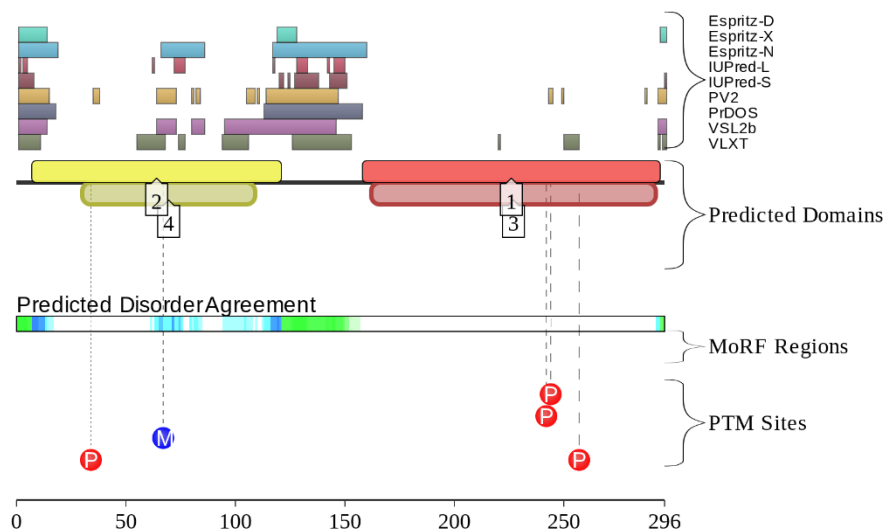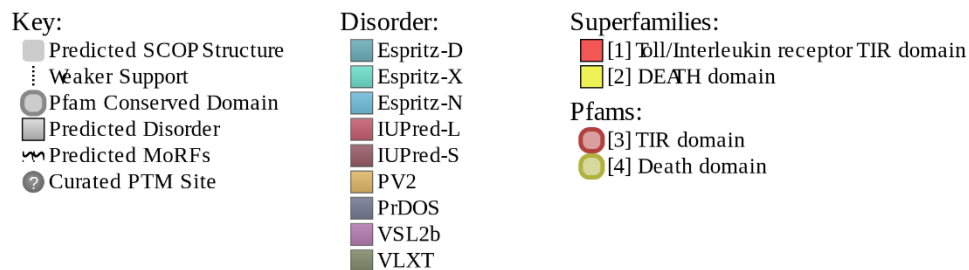



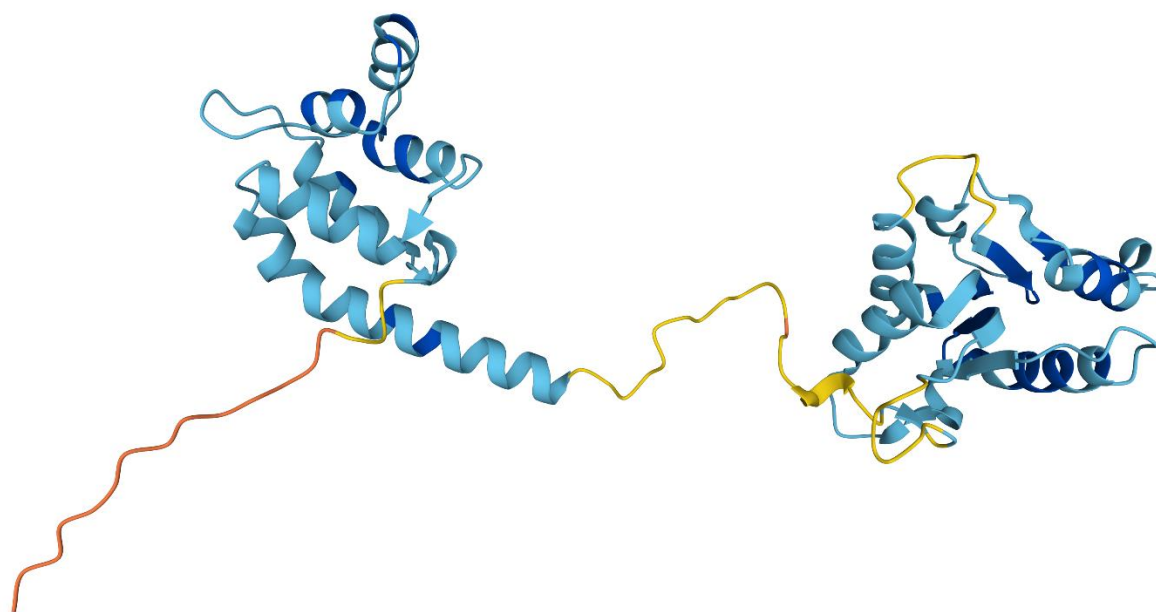

```

>sp|P51617|IRAK1_HUMAN Interleukin-1 receptor-associated kinase 1 OS=Homo sapiens
OX=9606 GN=IRAK1 PE=1 SV=2
MAGGPGGPEPAAPGAQHFLYEVPPWVMCRFYKVMdalePADWCQFAALIVRDQTELRLCERSGQRTASVLWPWINRNARVADLVH
ILTHLQLLRARDIITAWHPPAPLPSPGTTAPRPSSIPAPAEAEAWSPRKLPSASTFLSPAFFPGSQTHSGPELGLVPSPASLWPP
PPSPAPSSTKPGPESSVSLQGARFPFFCWPLCEISRGTNHFSEELKIGEGGFGCVYRAVMRNTVYAVKRLKENADLEWTAVKQS
FLTEVEQLSRFRHPNIVDFAGYCAQNGFYCLVYGFLPNGLSLEDRLHCQTQACPLSWPQRLDILLGTARAIQFLHQDSPSLIHGD
IKSSNVLLDERLTPKLGDFGLARFSRFAGSSPSQSSMVARTQTVRGTLAYLPEEYIKTGR LAVD TDTFSFGVVVLETLAQRAVK
THGARTKYLKDLVEEEAEAEAGVALRSTQSTLQAGLAADAWAAPIAMQIYKKHLDP RP GPCPELGLGLGQLACCLHRRRAKRRPP
MTQVYERLEKLQAVVAGVPGHSEAASCI PPSPQENS YV SSTGRAHSGAAPWQPLAAPSGASAAEQ LQRGPNQPVESDES LGGL
SAALRSWHLTPSCPLDPAPLREAGCPQGD TAGESSWGSGPGSRPTAVEGLALGSSASSSSEPPQII INPARQKMVQKLALYEDGA
LDSLQLLSSSSLPGLGLEQDRQGPEESDEFQS

```

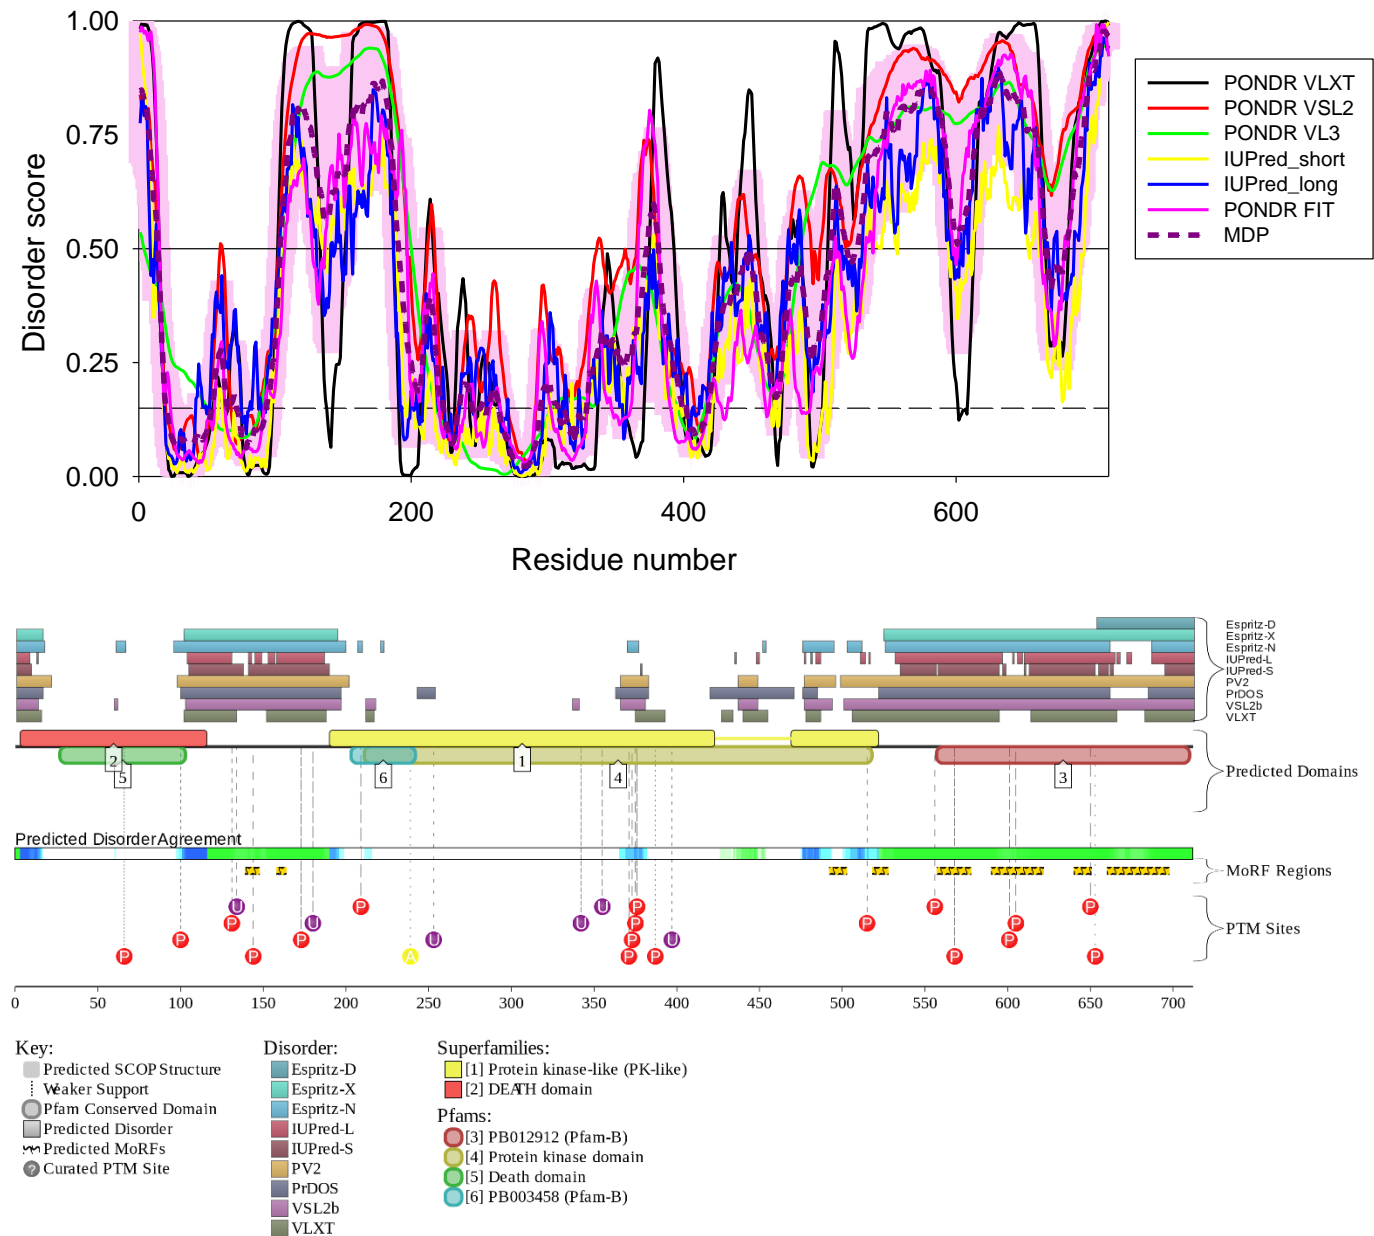



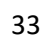

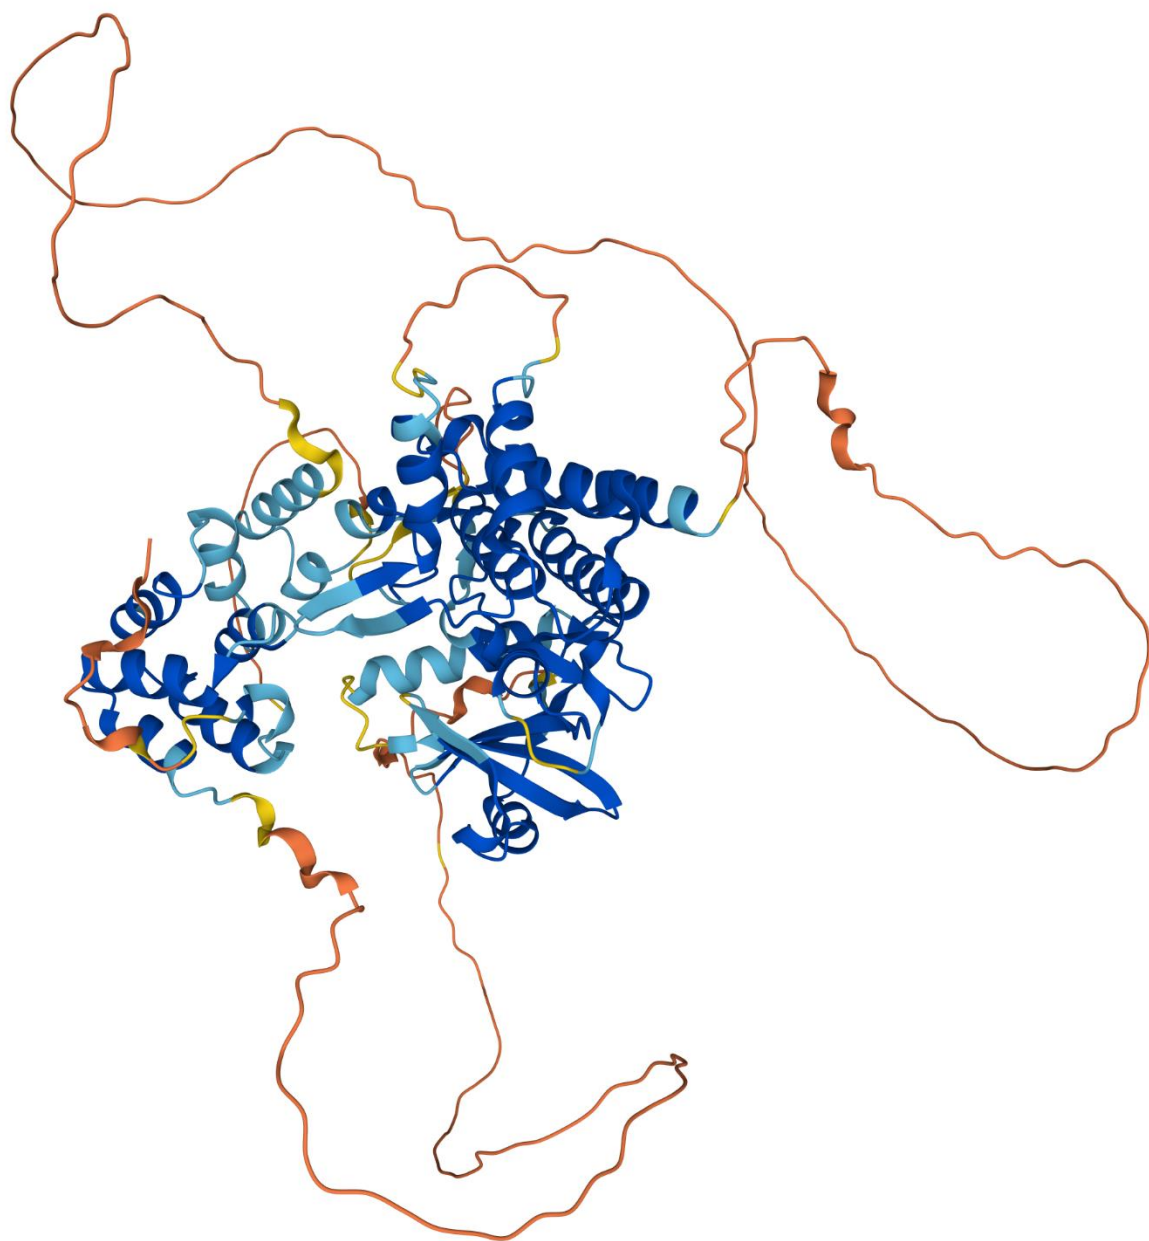



```
>sp|Q9NWZ3|IRAK4_HUMAN Interleukin-1 receptor-associated kinase 4 OS=Homo sapiens
OX=9606 GN=IRAK4 PE=1 SV=1
MNKPITPSTYVRCLNVGLIRKLSDFDIDPQEGWKKLAVAIKKPSGDDRYNQFHIRRFEALLQTGKSPTSELLFDWGTNCTVGDV
LLIQNEFFAPASLLLPDAVPKTANTLPSKEAITVQQKQMPFCDDKRTLMTPVQNLEQSYMPPDSSSPENKSLEVSDFHFSF
YELKNVTNNFDERPISVGGNKMGEFGVYKGYVNNTTVAVKKLAAMVDITTEELKQQFDQEIKVMAKCQHENLVELLGFSSDG
DDLCLVYVYMPNGSLDLRLSCLDGTPLPSWHMRCKIAQGAANGINFLHENHHIHRDIKSANILLDEAFTAKISDFGLARASEKFA
QTVMTSRIVGTTAYMAPEALRGEITPKSDIYSFGVVLLEIITGLPAVDEHREPQLLLDIKEEIEDEEKTIEDYIDKKMNDADSTS
VEAMYSVASQCLHEKKNKRDPDIKKVQQLQEMTAS
```

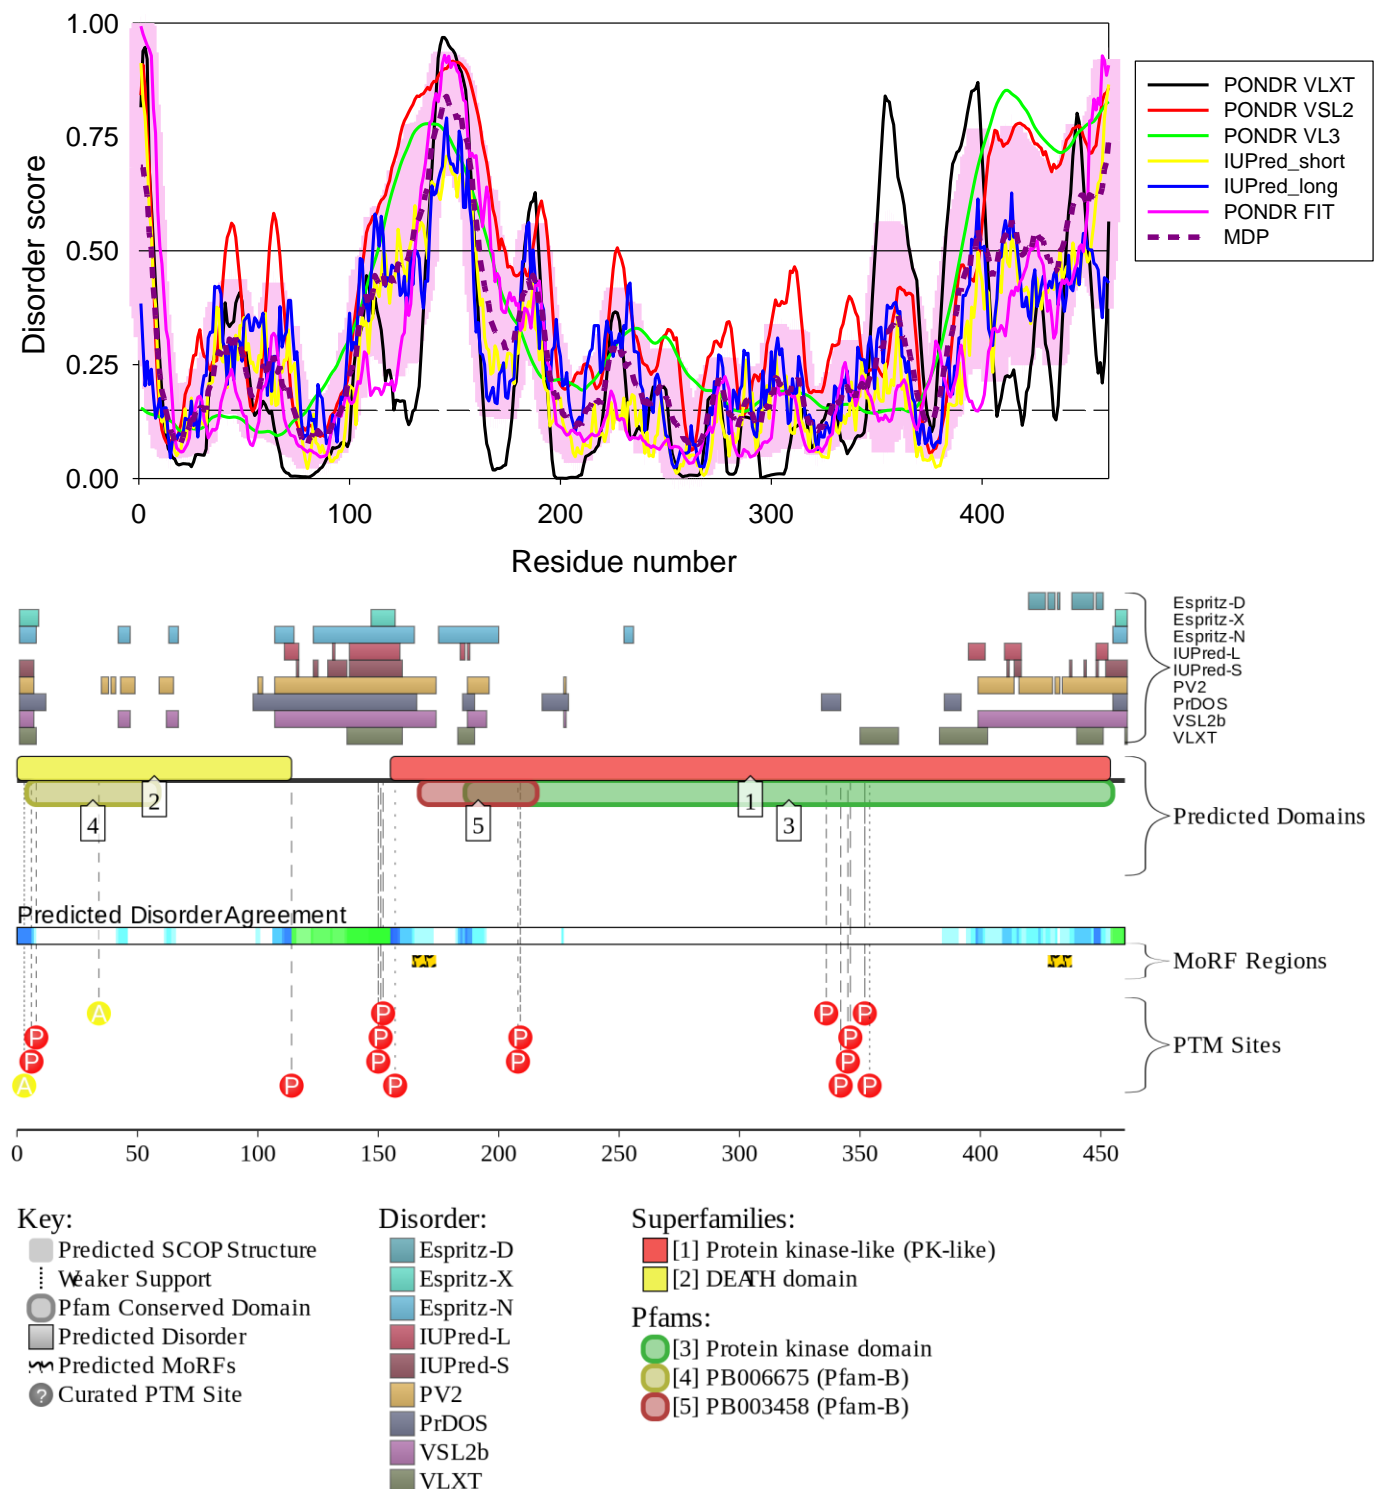

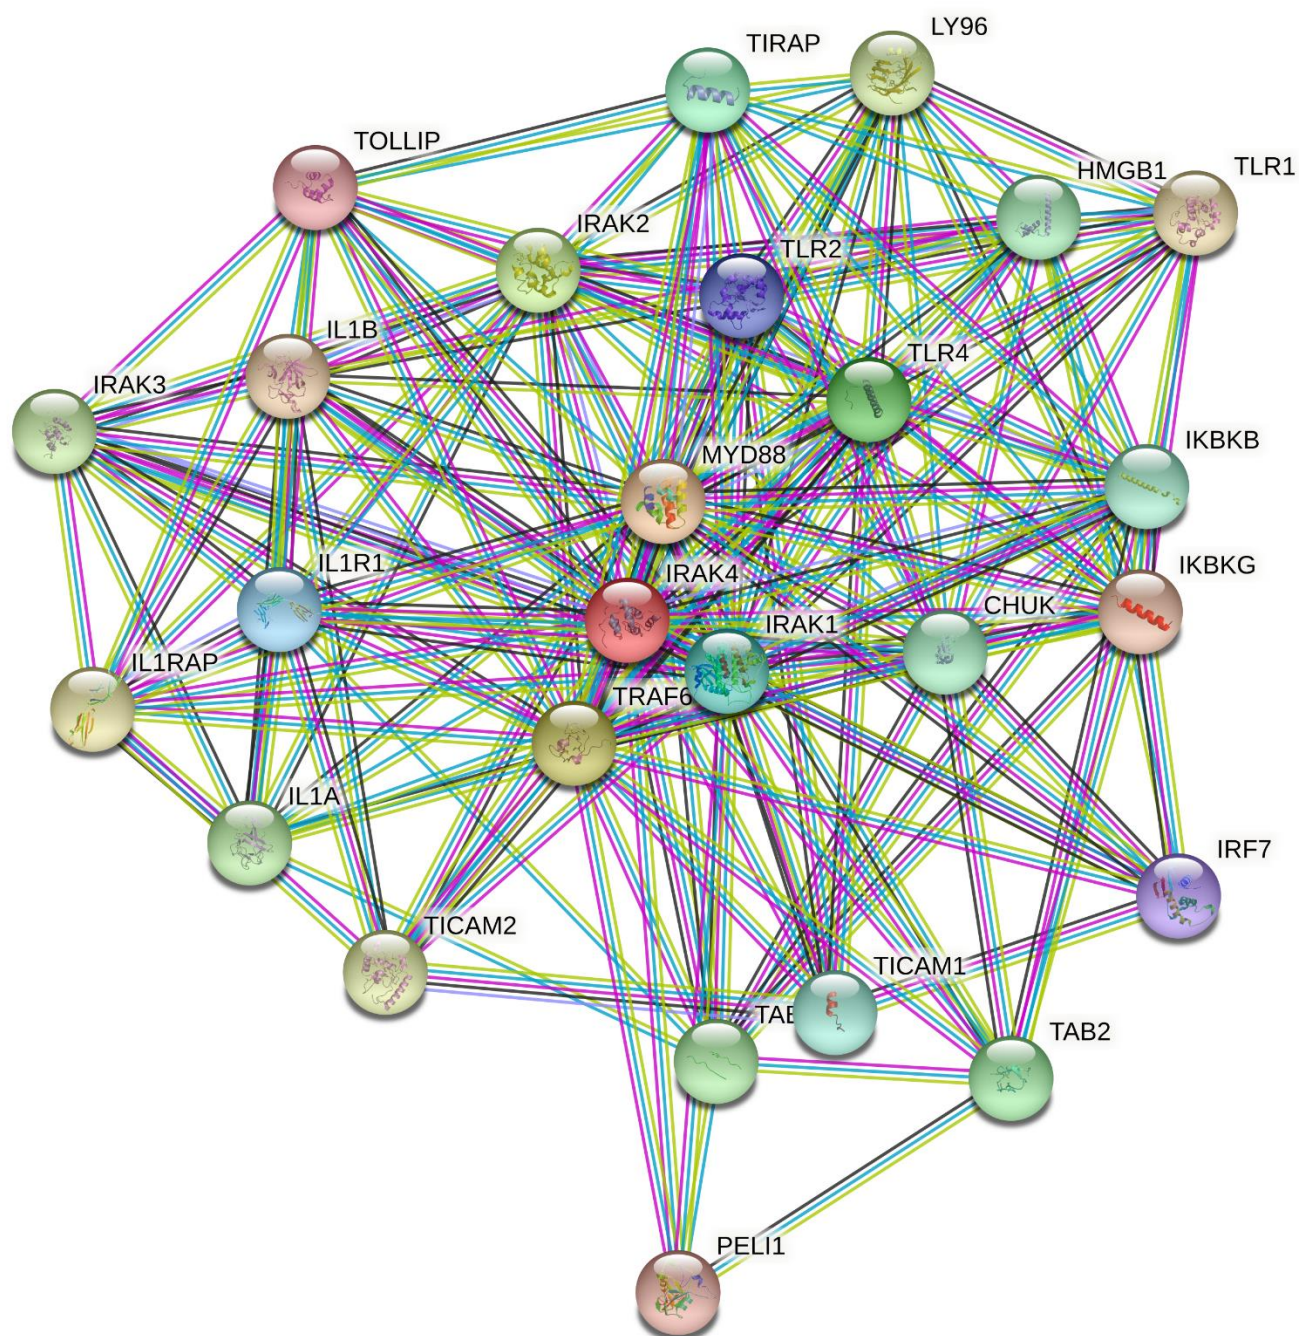

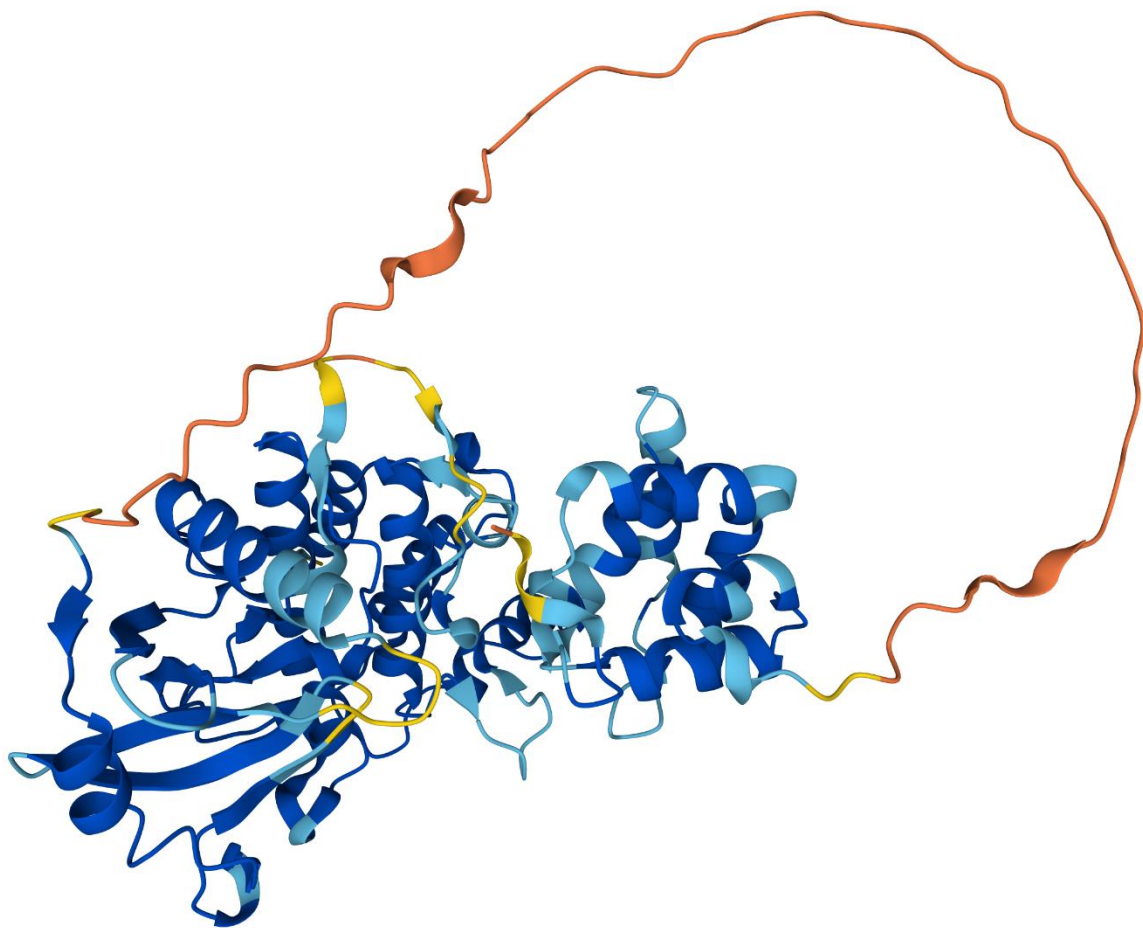

```
>sp|Q9Y4K3|TRAF6_HUMAN TNF receptor-associated factor 6 OS=Homo sapiens OX=9606
GN=TRAF6 PE=1 SV=1
MSLLNCENSCGSSQSESDCCVAMASSCSAVTKDDSVGGTASTGNLSSSFMEEIQGYDVEFDPPLESKYECPICLMALREAVQTPC
GHRFCKACIIKSIRDAGHKCPVDNEILLENQLFPDNFAKREILSLMVKCPNEGCLHKMELRHLEDHQAHCEFALMDCPQCQRPFO
KFHINIHLKDCPRRQVSCDNCAASMAFEDKEIHDQNCPLANVICEYCNTILIREQMPNHYDLDCPTAPICTFSTFGCHEKMQR
NHLARHLQENTQSHMRMLAQAVHLSVIPDSGYISEVRNFQETIHQLEGLRQVLDHQLIRELTAKMETQSMYVSELKRTIRTLEDK
VAEIEAQQCNGIYIWKIGNFGMHLKCEEEKPVVIHSPGFYTGKPGYKLCMRLHLQLPTAQRCANYISLFVHTMQGEYDShLPWP
FQGTIRLTILDQSEAPVRQNHEEIMDAKPELLAFQRPTIPRNPKGFGYVTFMHLEALRQRTFIKDDTLLVRCEVSTRFDMGSLRR
EGFQPRSTDAGV
```

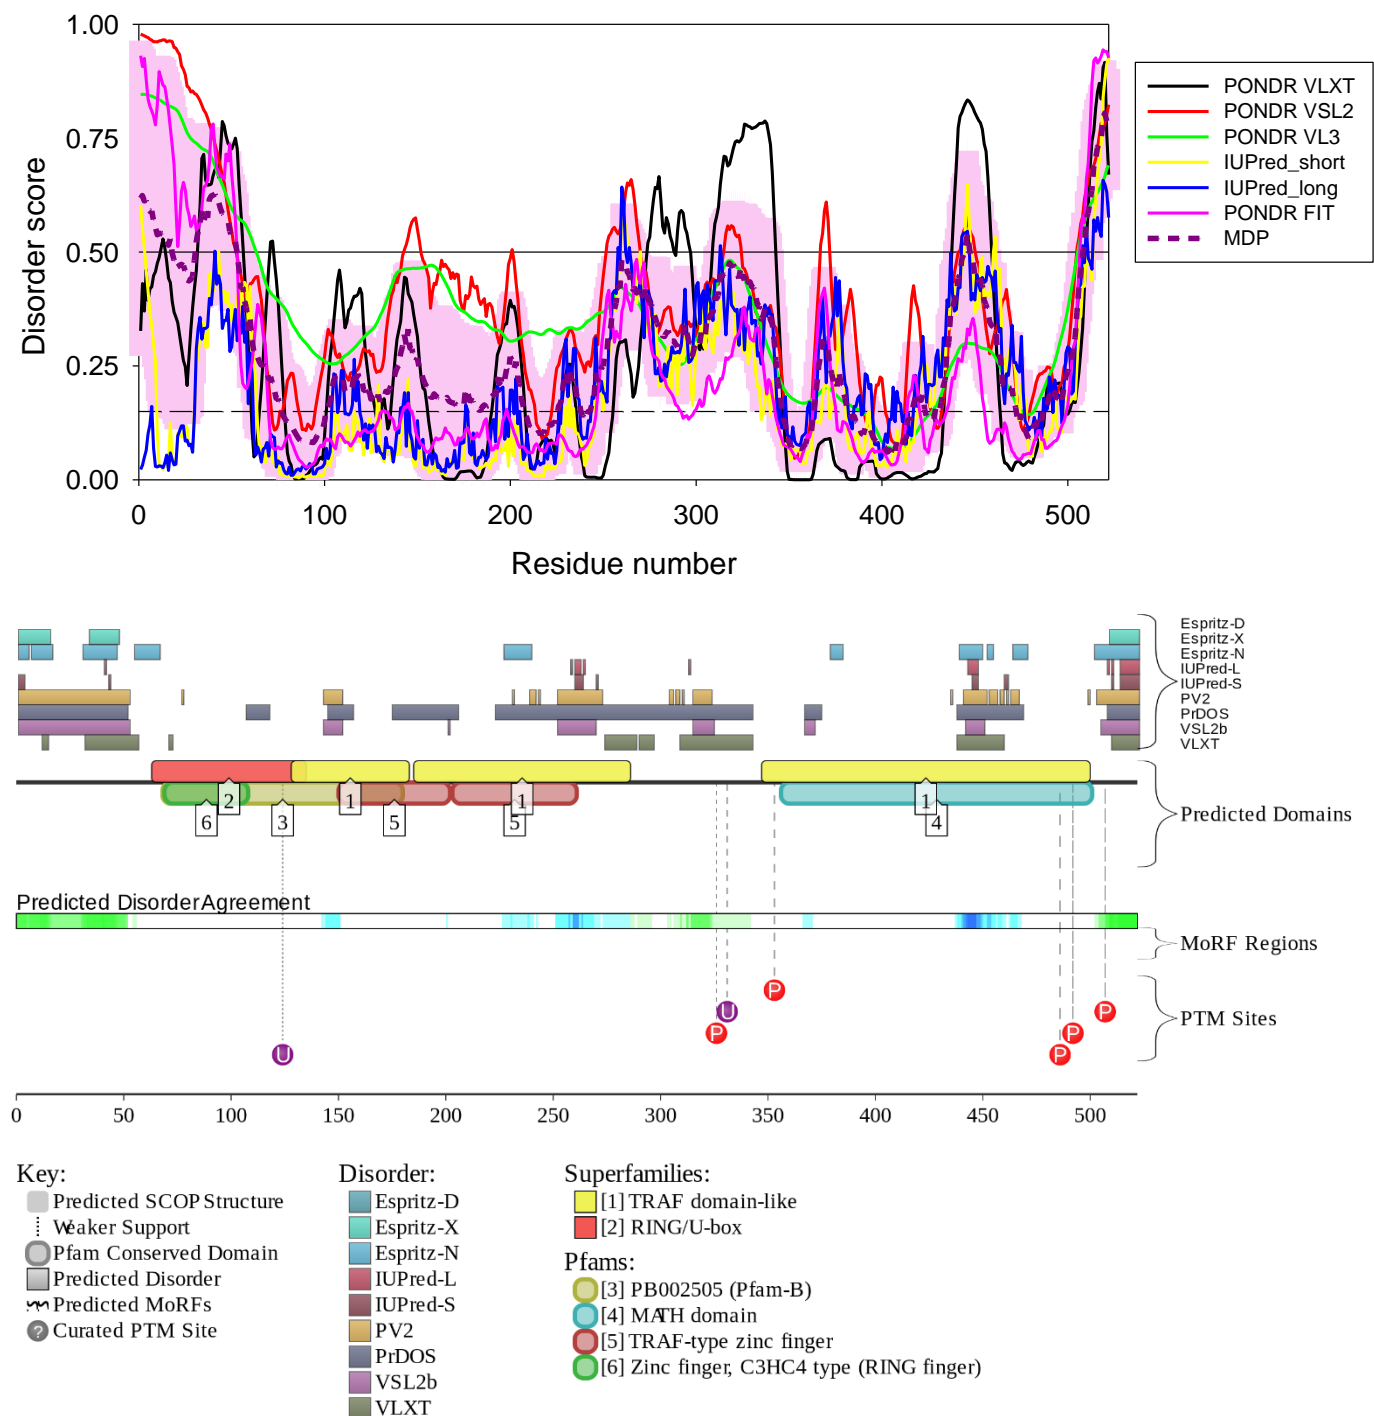



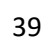

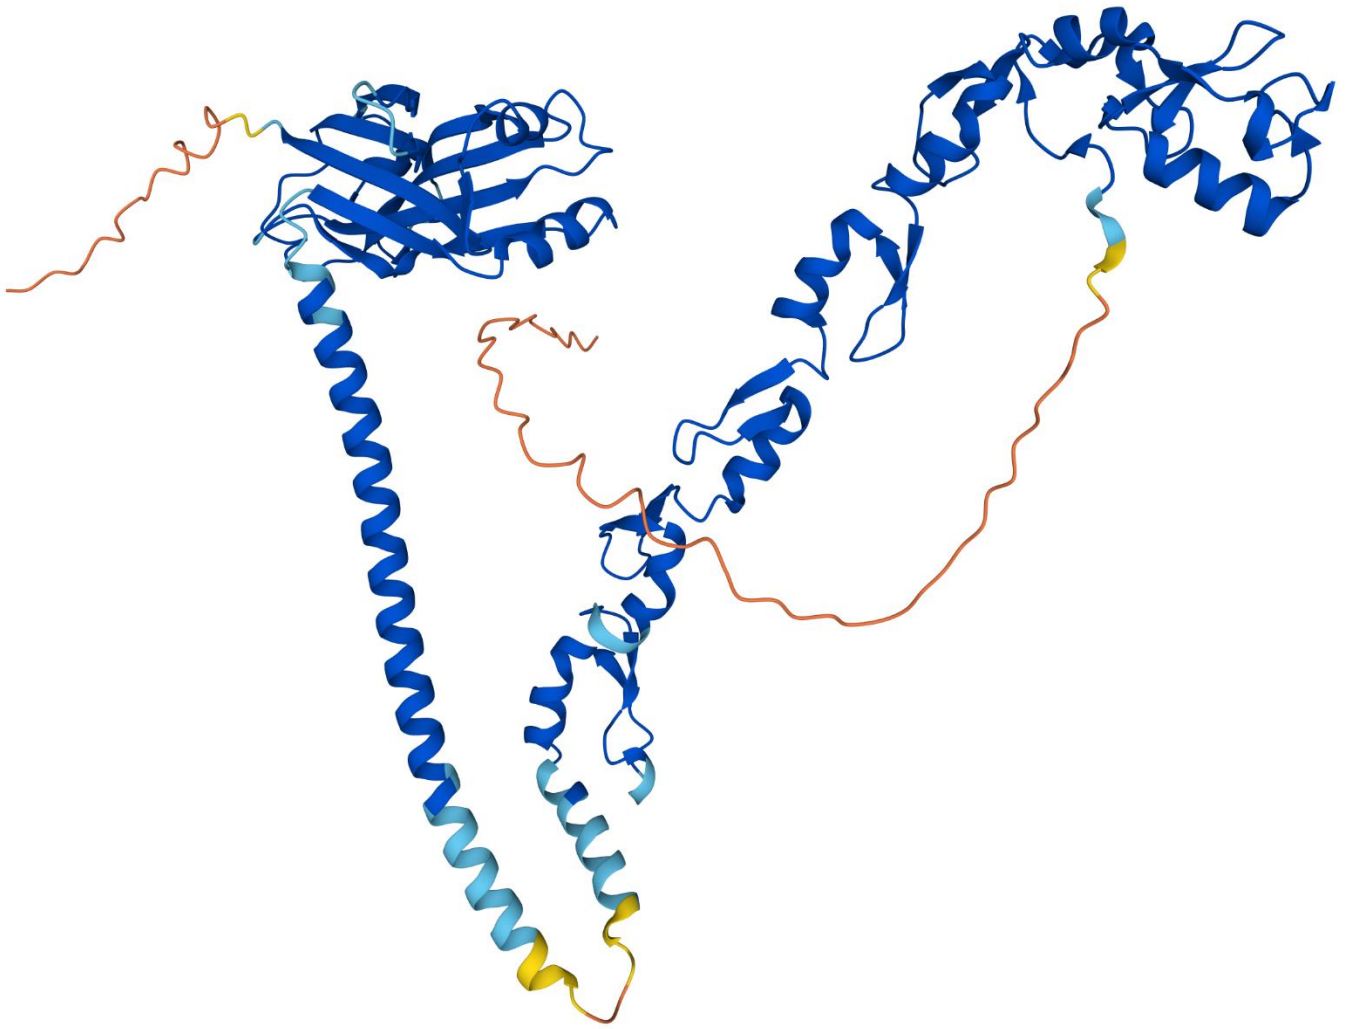

```

>sp|O43318|M3K7_HUMAN Mitogen-activated protein kinase kinase kinase 7 OS=Homo
sapiens OX=9606 GN=MAP3K7 PE=1 SV=1
MSTASAASSSSSSSAGEMIEAPSQVLNFEEIDYKEIEVEEVVGRGAFGVVCKAKWRAKDVAIKQIESESERKAFIVELRQLSRVN
HPNIVKLYGACLNPFVCLVMEYAEGGSLYNVLHGAEPYPYTAAHAMSWCLQCSQGVAYLHSMQPKALIHRLDKPPNLLLAVAGGTV
LKICDFGTACDIQTHMTNNKGSAAWMAPEVFEGSNYSEKCDVFSWGIILWEVITRRKPFDEIGGPAFRIMWAVHNGTRPPLIKNL
PKPIESLMTRCWSKDPSQRPMSMEEIVKIMTHLMRYFPGADEPLQYPCQYSDEGQSN SATSTGFSFMDIASTNTSNKSDTNMEQVPA
TNDTIKRLESKLLKNQAKQQSESGRLSLGASRGSSVESLPPTSEGKRMSADMSEIEARIAATTAYSKPKRGHRKTASF GNILDVP
EIVISGNGQPRRRSIQDLTVTGTEPGQVSSRSSSPSVRMITTS GPTSEKPTRSHPWTPDDSTD TNGSDNSIPMAYLTLDHQLQPL
APCPNSKESMAVFEQHCKMAQEYMKVQTEIALLLQRKQELVAELDQDEKDQQNTSRLVQEHKKLLDENKSLSTYYYQQCKKQLEVI
RSQQQKRQGT S

```

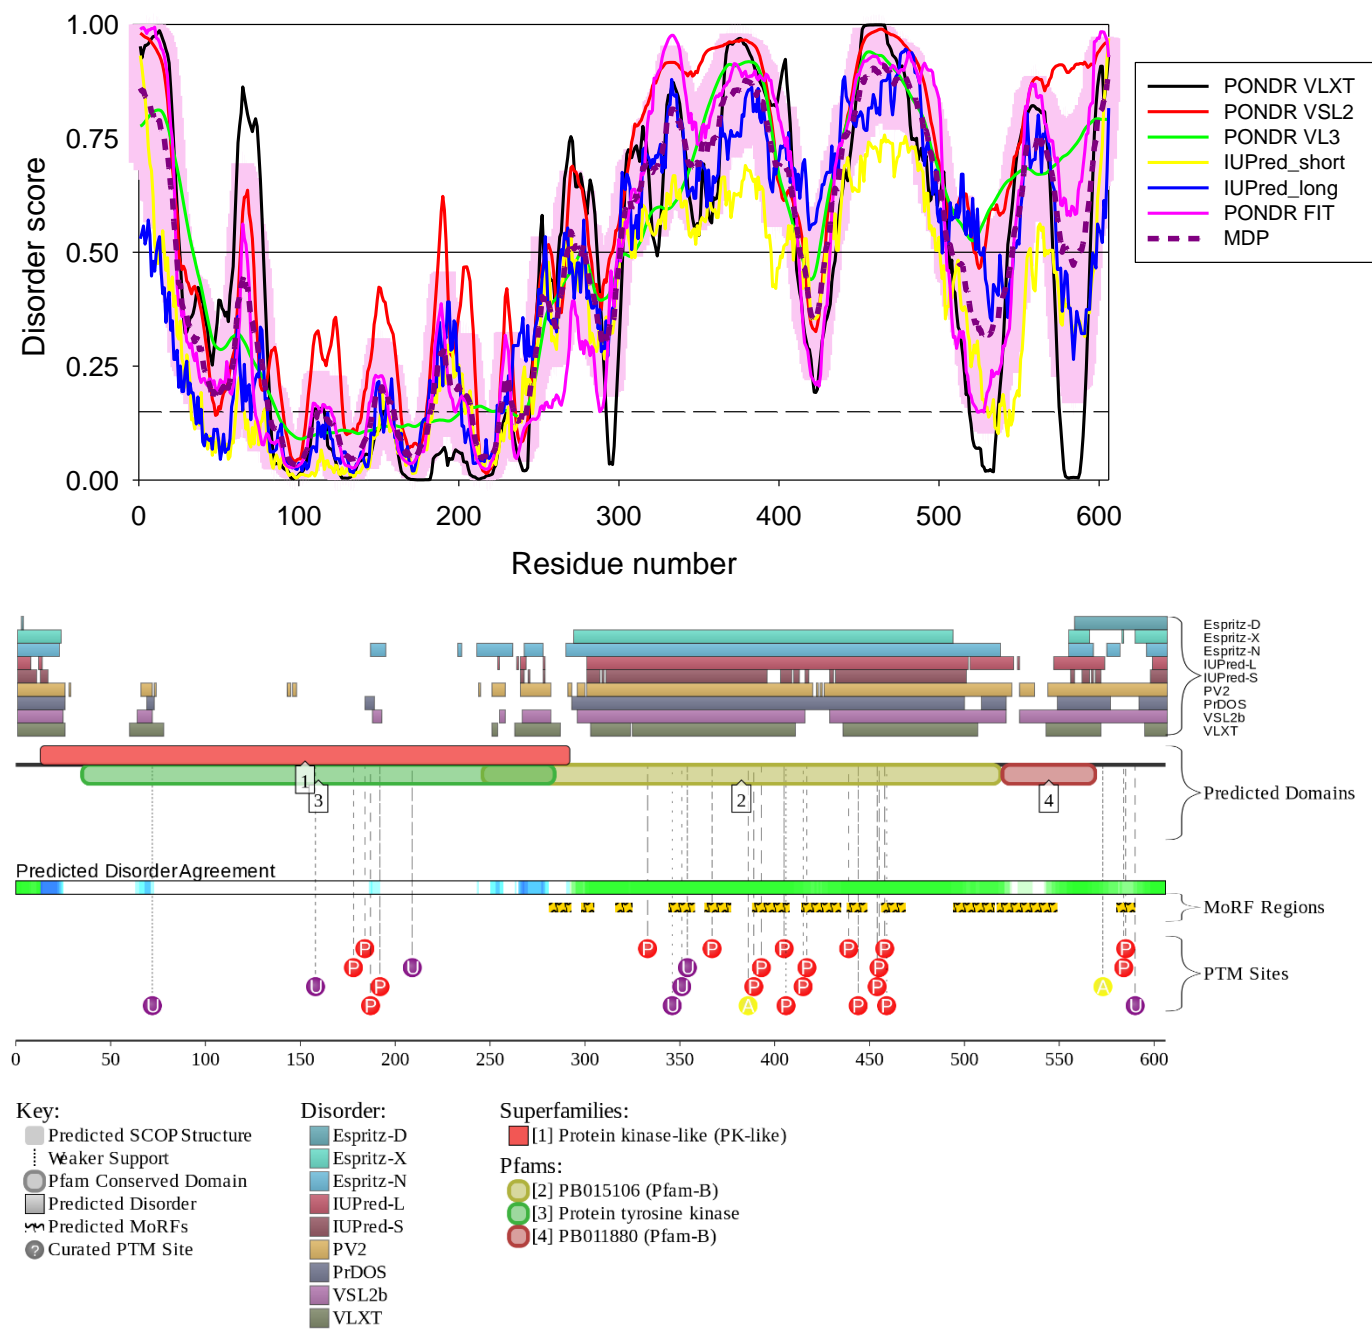







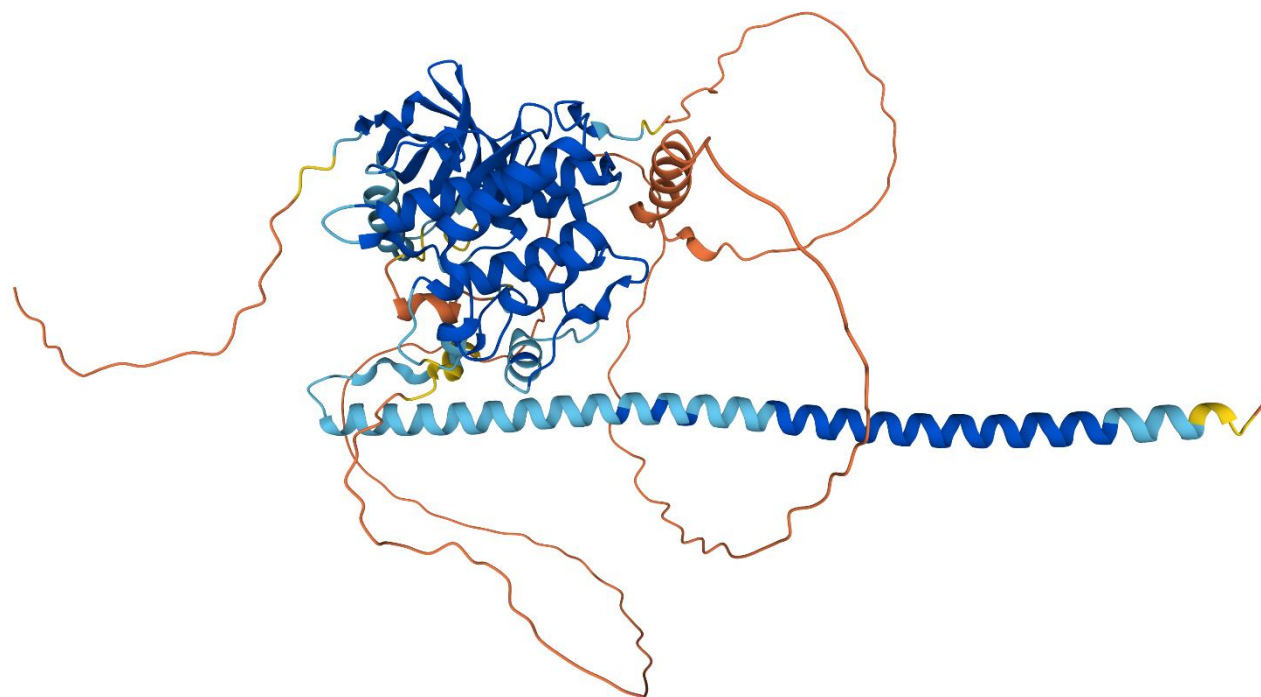

```

>sp|P28482|MK01_HUMAN Mitogen-activated protein kinase 1 OS=Homo sapiens OX=9606
GN=MAPK1 PE=1 SV=3
MAAAAAGAGPEMVRGQVFDVGPRYTNSYIGEGAYGMVCSAYDNVNKVRVAIKKISPFHQTYCQRTLREIKILLRFRHENIIG
INDIIRAPTIEQMKDVYIVQDLMETDLYKLLKTQHLSNDHICYFLYQILRGLKYIHSANVLHRDLKPSNLLLNTTCDLKICDFGL
ARVADPDHDHTGFLTEYVATRWRAP EIMLNSKGYTKSIDIWSVGCILAEMLSNRPIFPKGHYLDQLNHILGILGSPSQEDLNCI
INLKARNYLLSLPHKNKVPWNRLFPNADSKALDLDKMLTFNPHKRIEVEQALAHPPYLEQYYDPSDEPIAEAPFKFDMELDDLPK
EKLKELIFEETARFQPGYRS

```

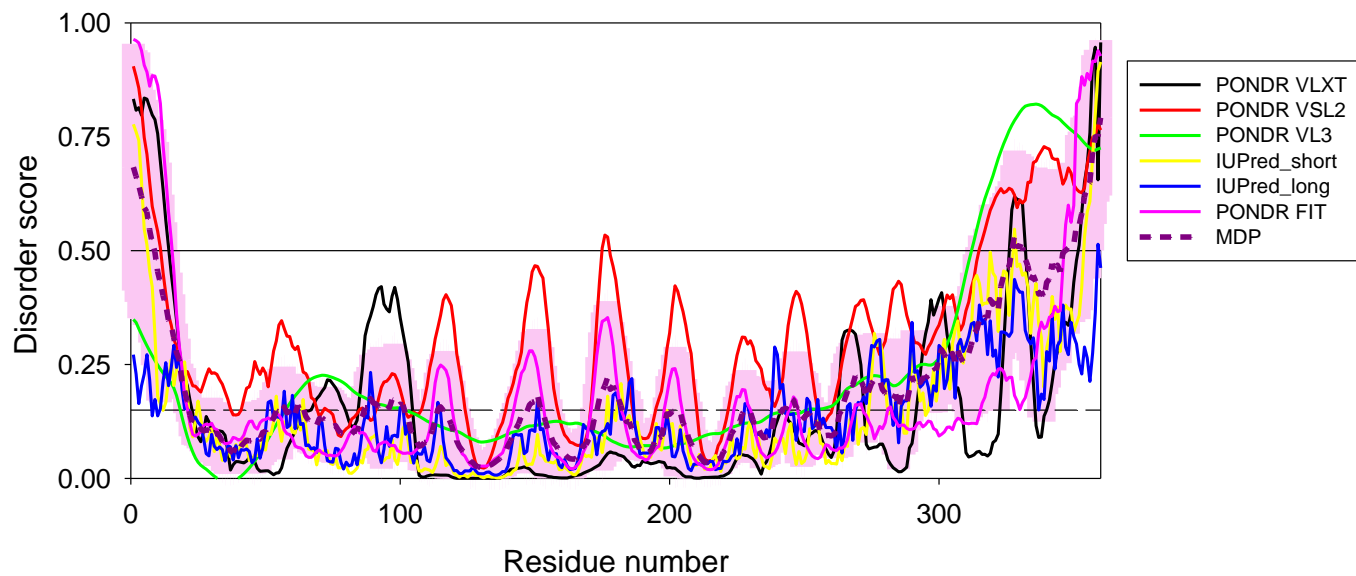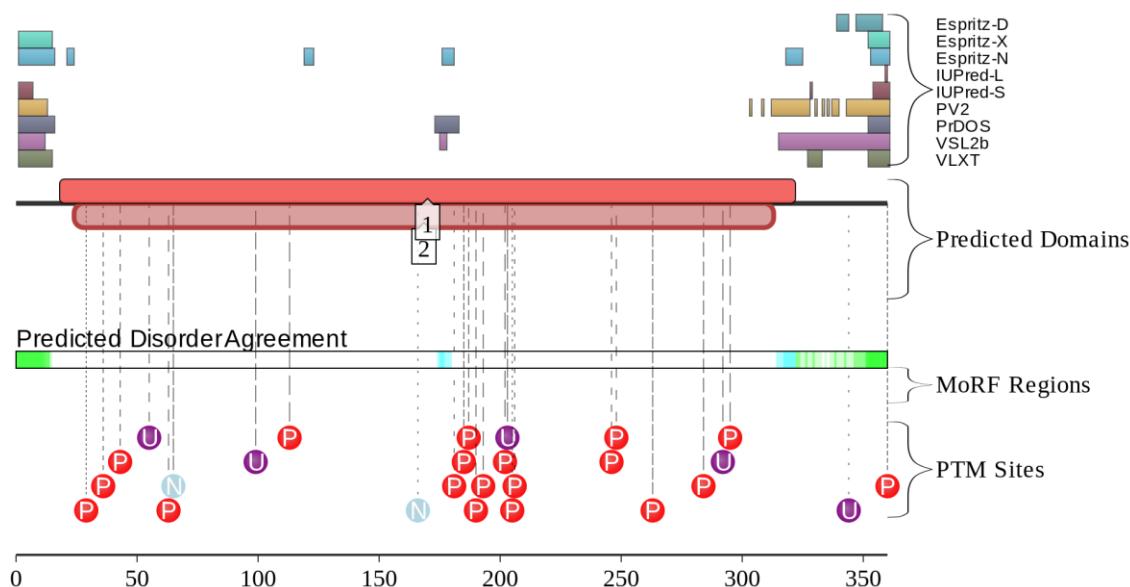

Key:

- Predicted SCOP Structure
- Weaker Support
- Pfam Conserved Domain
- Predicted Disorder
- Predicted MoRFs
- Curated PTM Site

Disorder:

- Espritz-D
- Espritz-X
- Espritz-N
- IUPred-L
- IUPred-S
- PV2
- PrDOS
- VSL2b
- VLXT

Superfamilies:

- [1] Protein kinase-like (PK-like)

Pfams:

- [2] Protein kinase domain

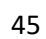



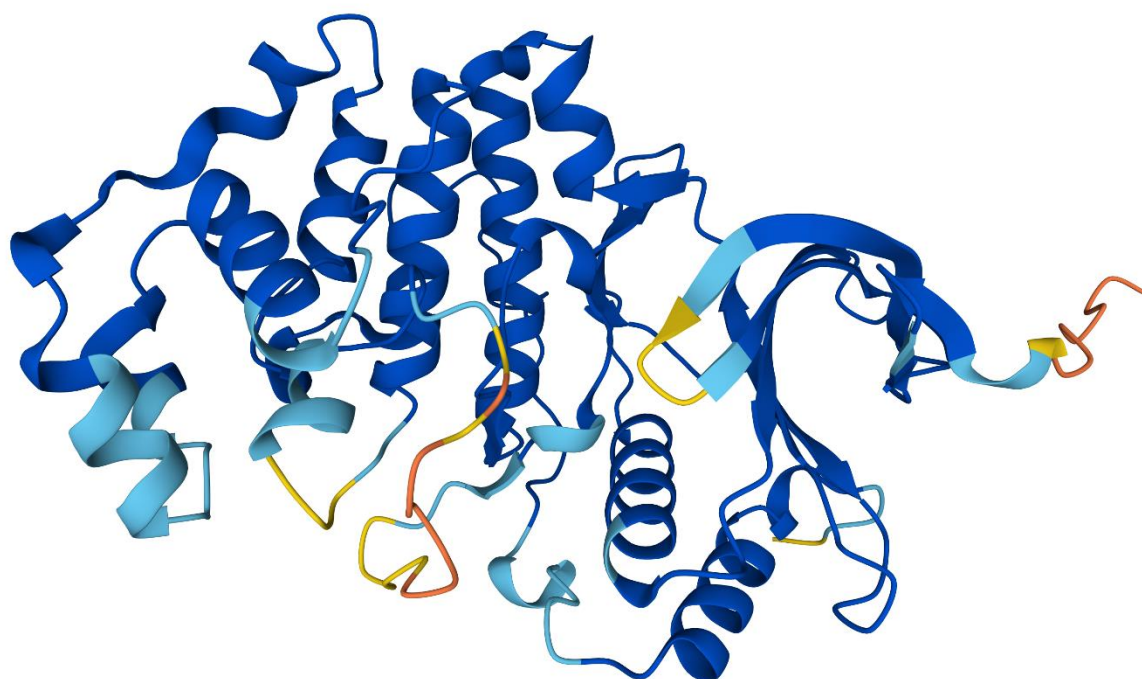



```
>sp|P27361|MK03_HUMAN Mitogen-activated protein kinase 3 OS=Homo sapiens OX=9606
GN=MAPK3 PE=1 SV=4
MAAAAQGGGGGEPRTTEGVGPGVPGEVEMVKGPFDVGPRYTQLQYIGEGAYGMVSSAYDHVRKTRVAIKKISPFHQTYCQRT
LREIQILLRFRHENVIGIRDILRASTLEAMRDVYIVQDLMETDLYKLLKSQQLSNDHICYFLYQILRGLKYIHSANVLHRDLKPS
NLLINTTCDLKICDFGLARIADPEHDHTGFLTEYVATRWYRAPEIMLNSKGYTKSIDIWSVGCILAEMLSNRPIFPKGHYLDQLN
HILGILGSPSQEDLNCIINMKARNYLQSLPSKTKVAWAKLFPKSDSKALDLDRLMTFNPKNKRITVEEALAHPPYLEQYYDPTDEP
VAEFPFTFAMELDDLPKERLKLKELIFQETARFQPGVLEAP
```

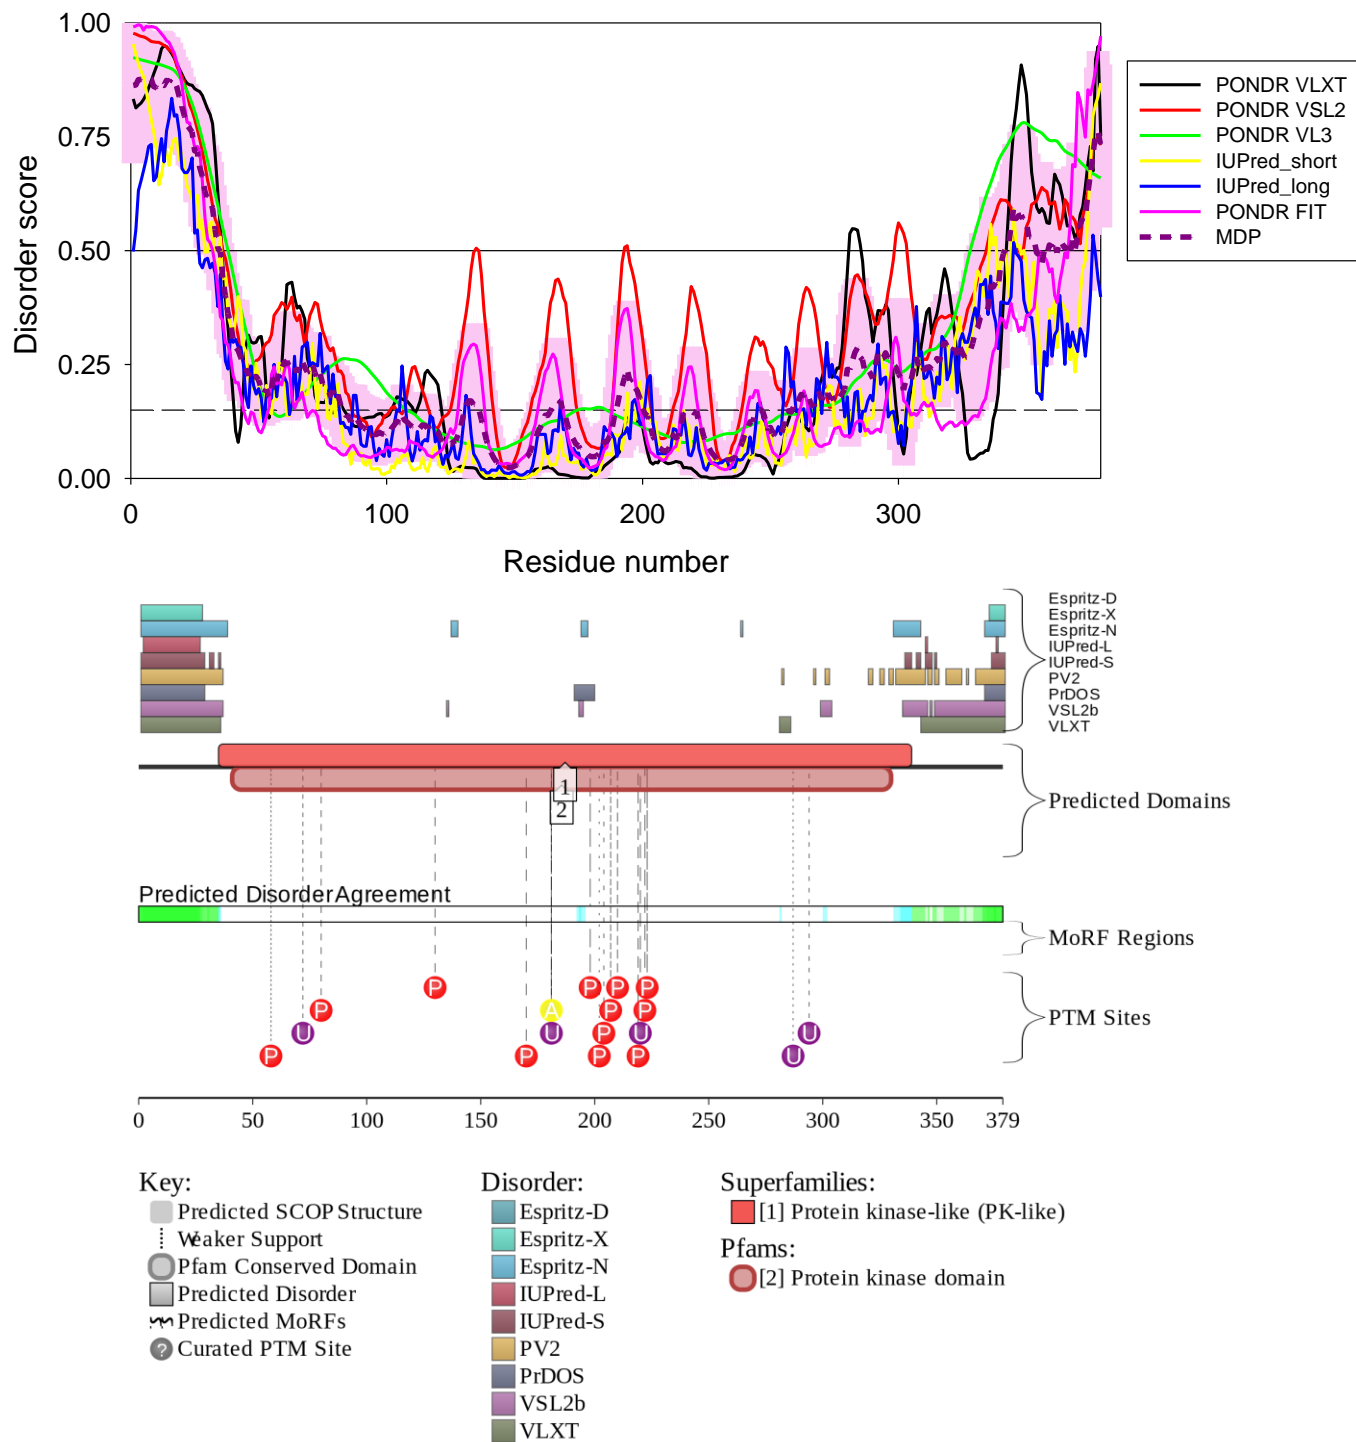

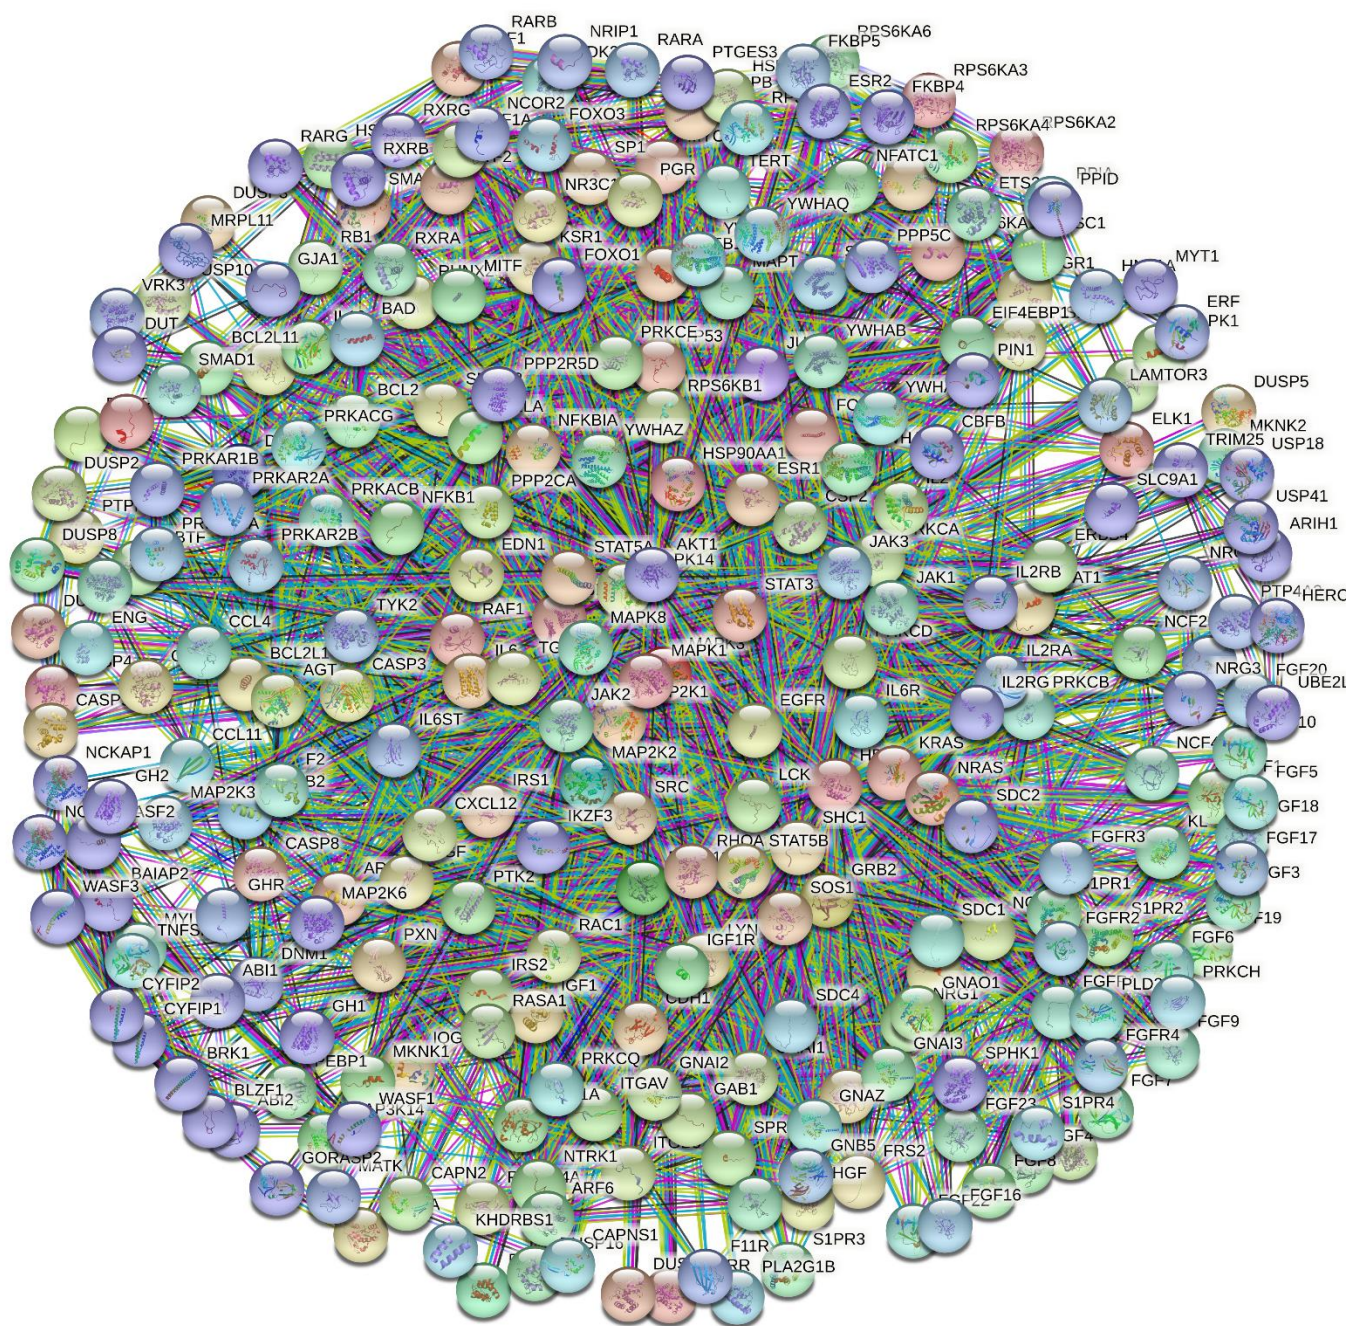



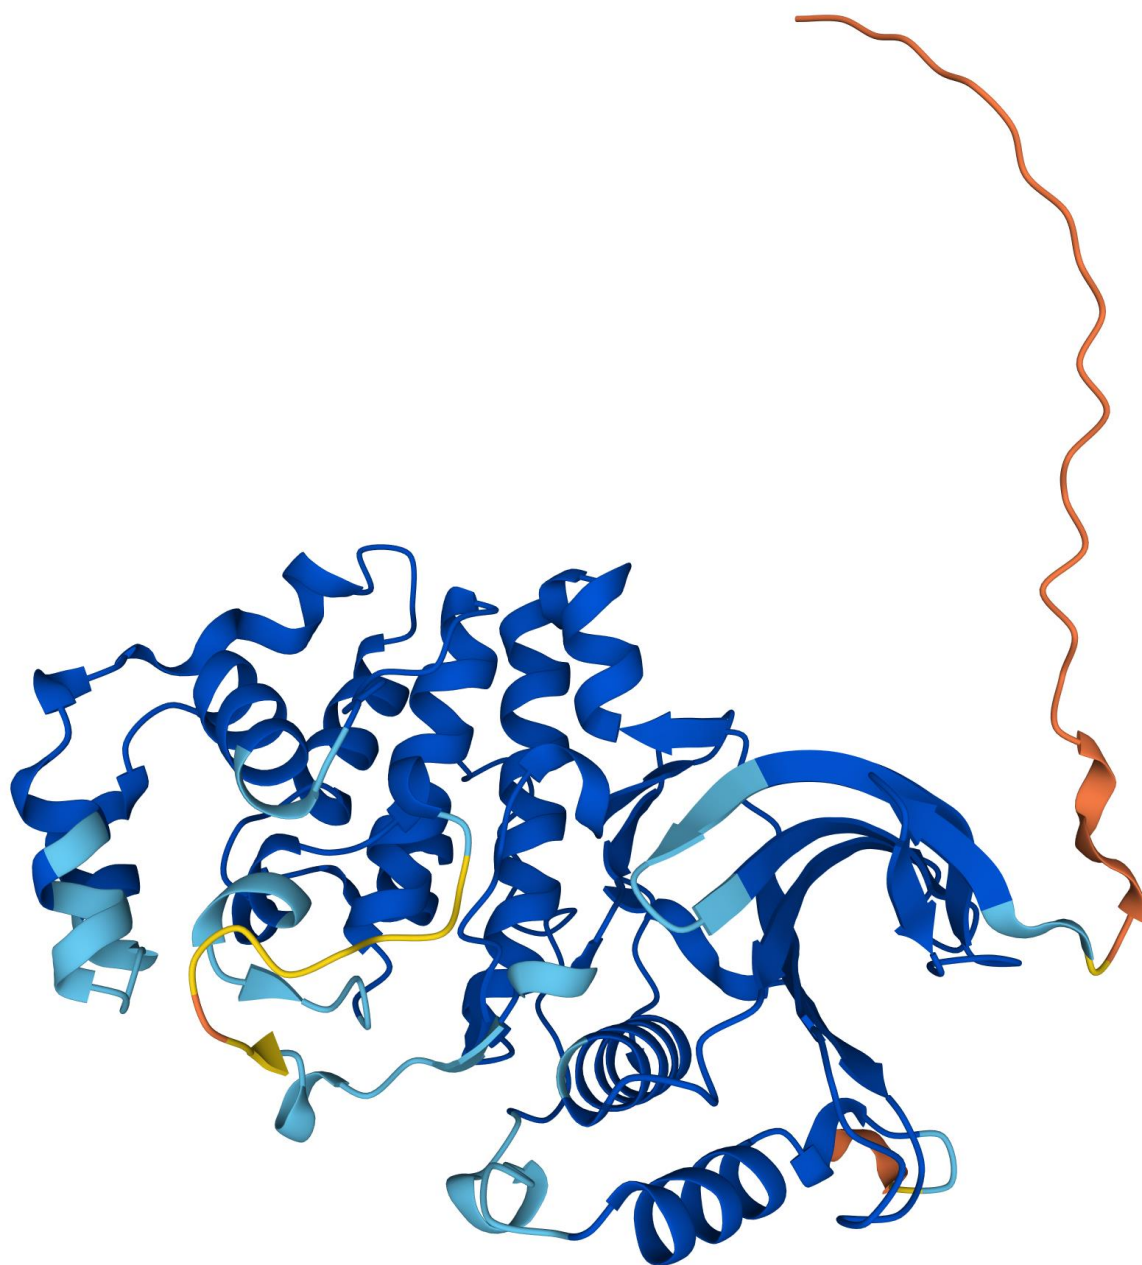

```
>sp|P31152|MK04_HUMAN Mitogen-activated protein kinase 4 OS=Homo sapiens OX=9606
GN=MAPK4 PE=1 SV=2
MAEKGDCIASVYGYDLGGRFVDFQPLGFGVNGLVLSAVDSRACRKVAVKKIALSDARSMKHALREIKIIRRLDHDNIVKVYEVLG
PKGTDLQGELFKFSVAYIVQEYMETDLARLLEQGTAEHAKLFMYQLLRGLKYIHSANVLHRDLKPANIFISTEDLVLKIGDFG
LARIVDQHYSHKGYLSEGLVTKWYRSPRLLSSPNNTKAIDMWAAGCILAEMLTGRMLFAGAHELEQMQLILETIPVIREEDKDE
LLRVMPFSFVSSTWEVKRPLRKLLEPVNSEAIDFLEKILTFNPMDRDLTAEMGLQHPYMSPYSCPEDEPTSQHPFRIEDEIDDIVLM
AANQSQLSNWDTCCSRYPVSLSSDLEWRPDRCQDASEVQRDPAGSAPLAEDVQVDPKDSHSSSERFLEQSHSSMERAFEADYG
RSCDYKVGSPSYLDKLLWRDNKPHHYSEPKLILDLSHWKQAAGAPPTATGLADTGAREDEPASLFLEIAQWVKSTQGGPEHASPP
ADDPERRLSASPPGRPAVPDGGASPQFDLDVFI SRALKLCTKPEDLPDNKLGDLNGACIPEHPGDLVQTEAFSKERW
```

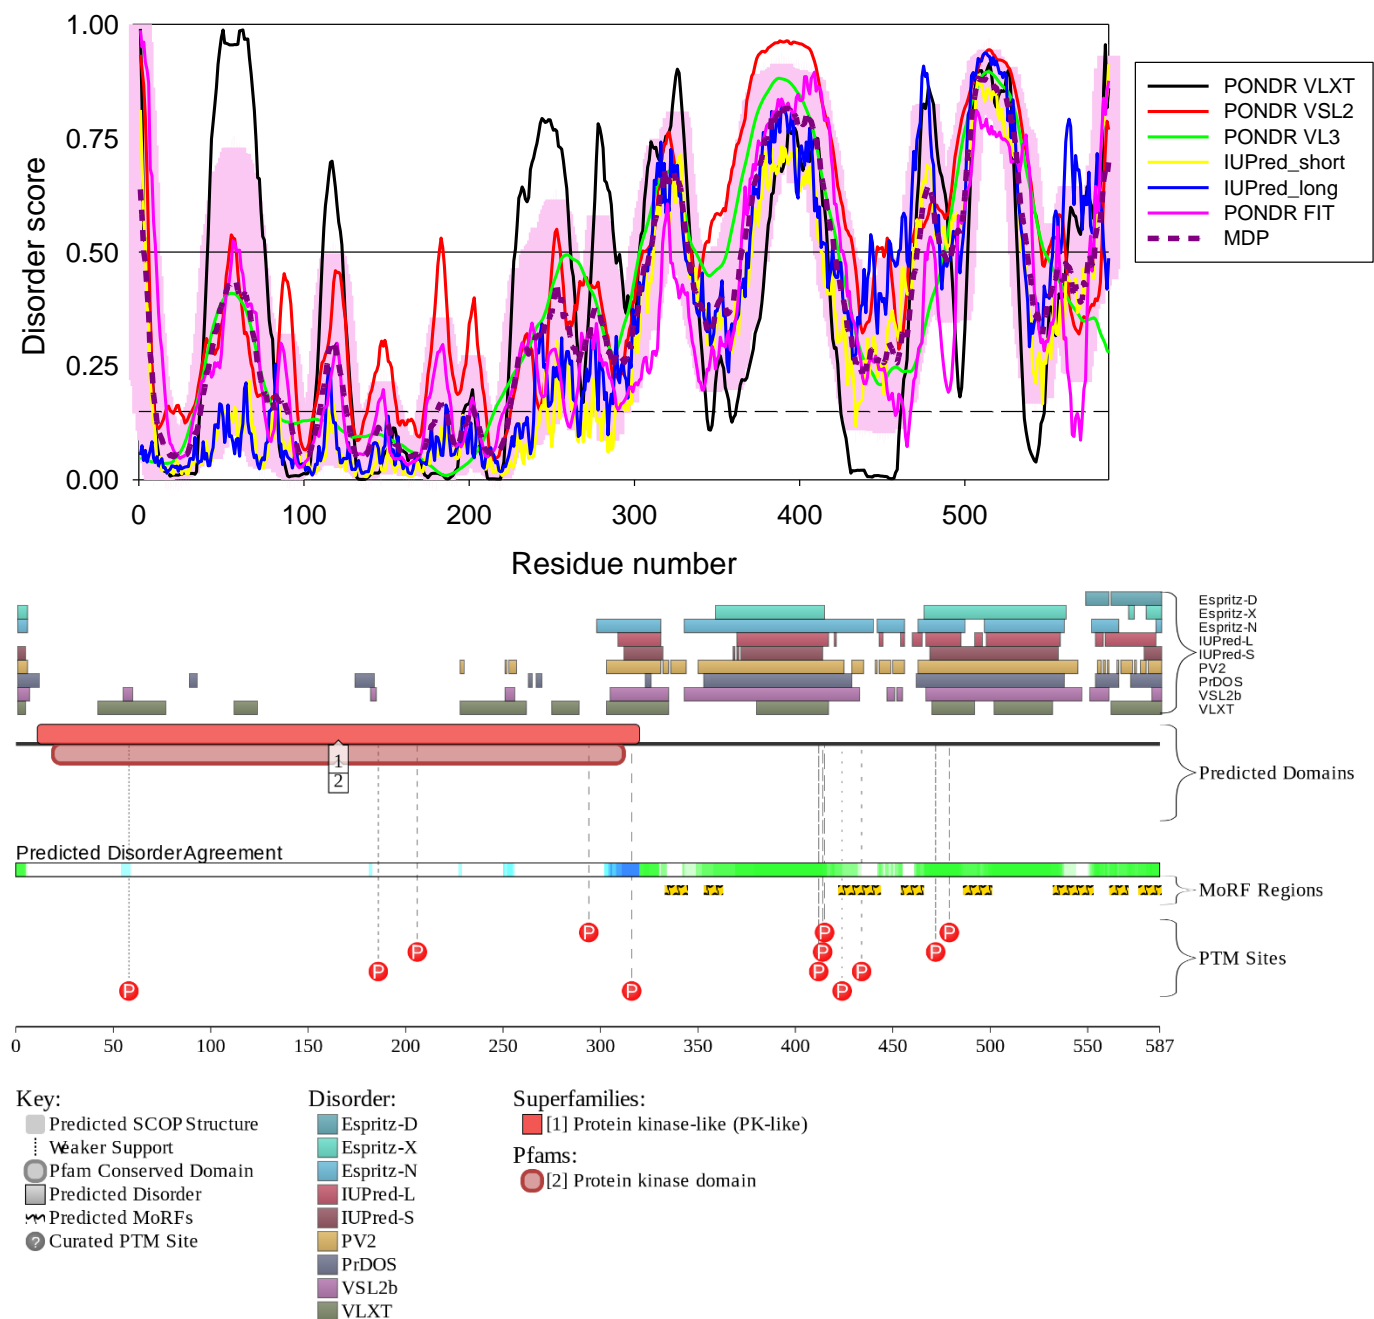



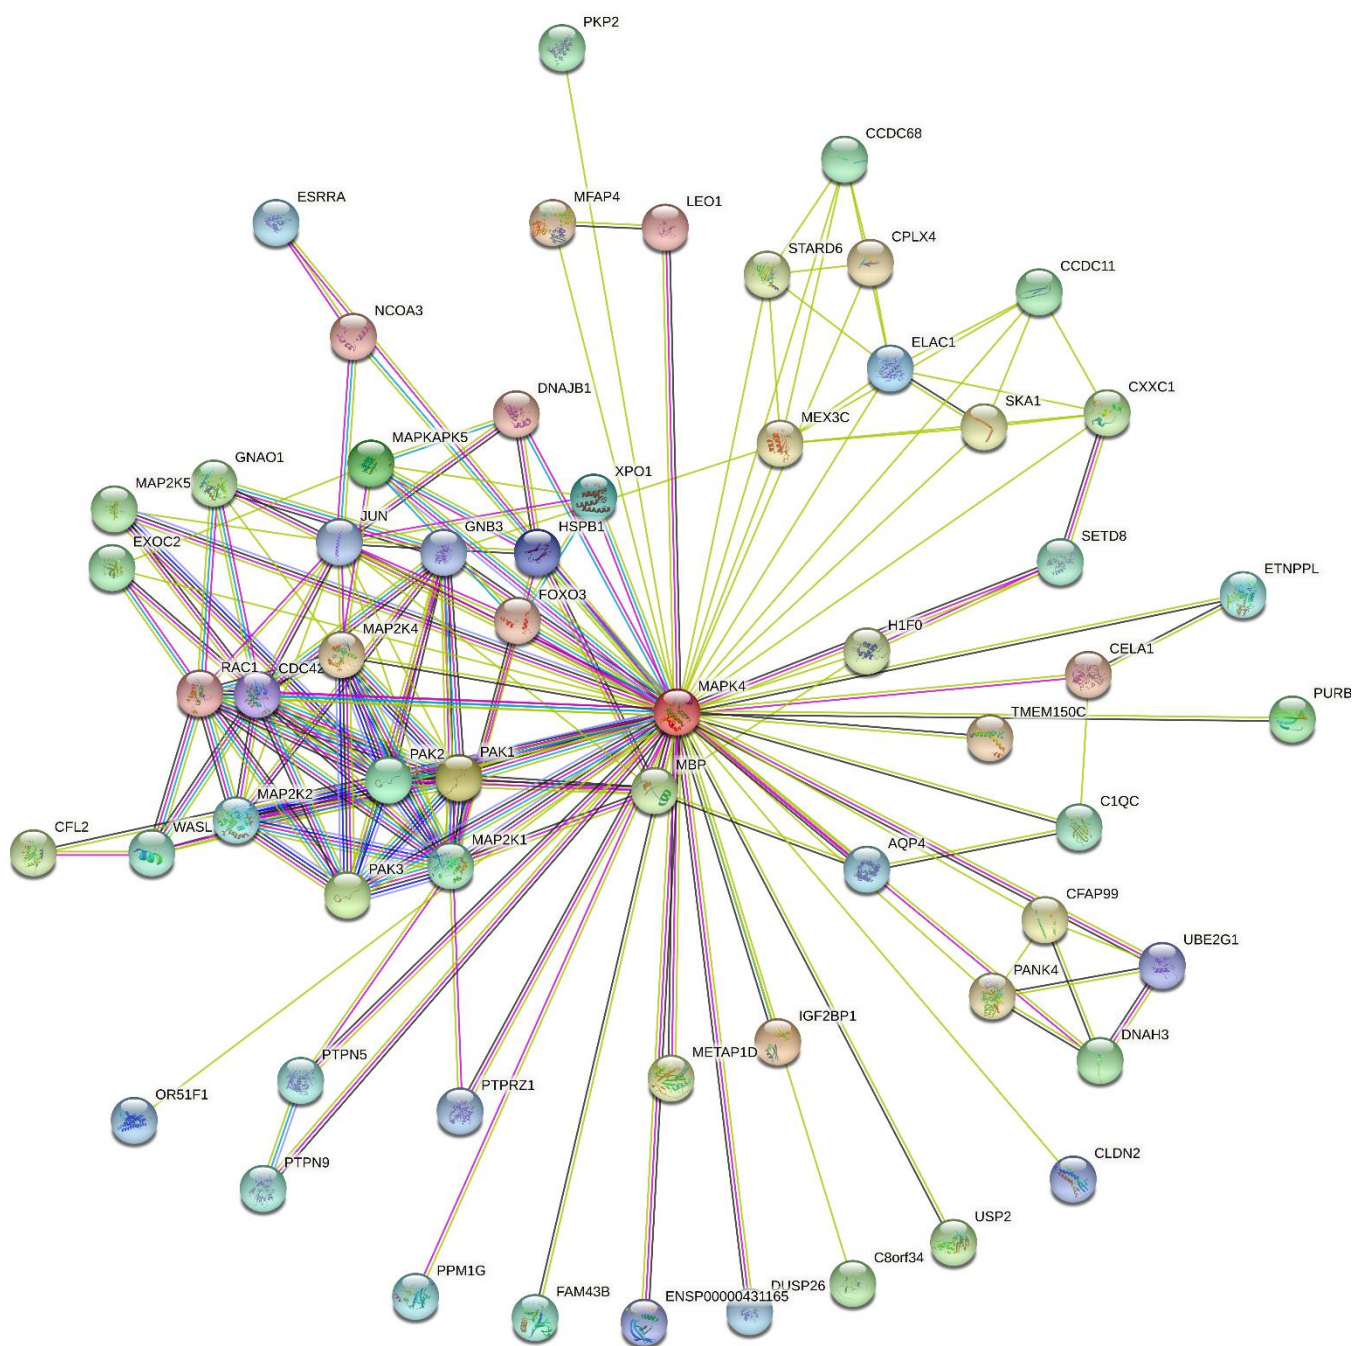

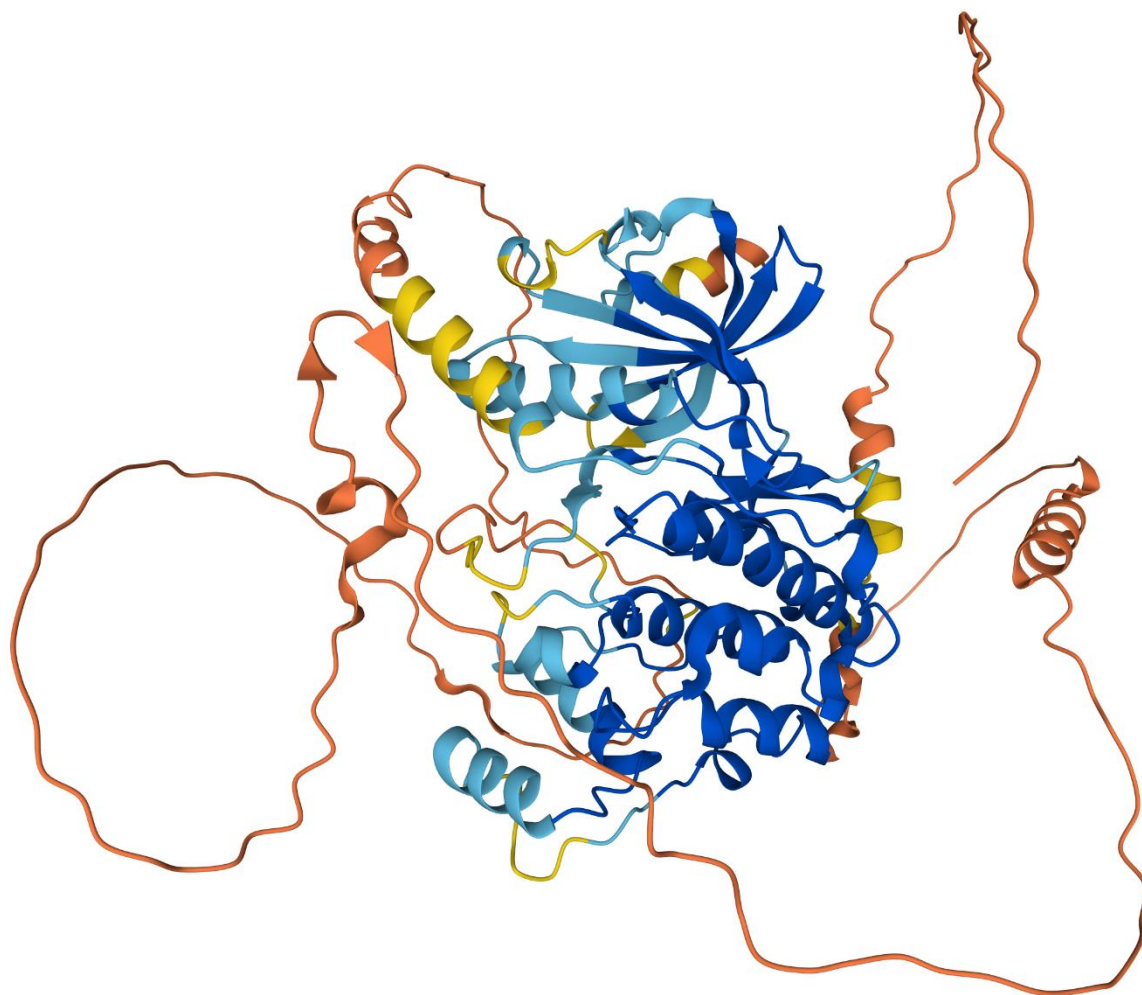

```

>sp|Q16659|MK06_HUMAN Mitogen-activated protein kinase 6 OS=Homo sapiens OX=9606
GN=MAPK6 PE=1 SV=1
MAEKFESLMNIHGFDLGSRYMDLKPLGCGGNLGFSAVDNDCDKRVAIKKIVLTDPQSVKHALREIKIIRRLDHDNIVKVFEILG
PSGSQLTDDVGSLELNSVYIVQEYMETDLANVLEQGPLLEEHLRFMYQLLRGLKYIHSANVLHRDLKPANLFINTEDLVLKIG
DFGLARIMDPHYSHKGLHSEGLVTKWYRSPRLLLSPNNYTKAIDMWAAGCIFAEMLTGKTLFAGAHELEQMQLILESIPVVHEED
RQELLSVIPVYIRNDMTEPHKPLTQLLPGISREALDFLEQILTFSPMDRLTAEALSHPYMSIYSFPMDEPISSHPFHIEDEVDD
IILMDETHSHIYNWERYHDCQFSEHDWPFVHNNFDIDEVQLDPRALSDVTDEEEVQVDPKRYLDGDREKYLEDPAFDTNYPEPCW
QYSDHHENKYCDLECSHTCNKYKTRSSSYLDNLVWRESEVNHYEYEPKLIIDLSNWKEQSKEKSDKKGKSKCERNGLVKAQIALEEA
SQQLAGKEREKNQGFDFDSFIAGTIQLSSQHEPTDVVDKLNLDLNSSVSQLELKSLSKSVSQEKQEKGMANLAQLEALYQSSWDS
QFVSGGEDCFFINQFCEVRKDEQVEKENTYTSYLDKFFSRKEDTEMLETEPVEDGKLGERGHEEGFLNNSGEFLFNKQLESIGIP
QFHSPVGSPLKSIQATLTPSAMKSSPQIPHQTYSSILKHLN

```

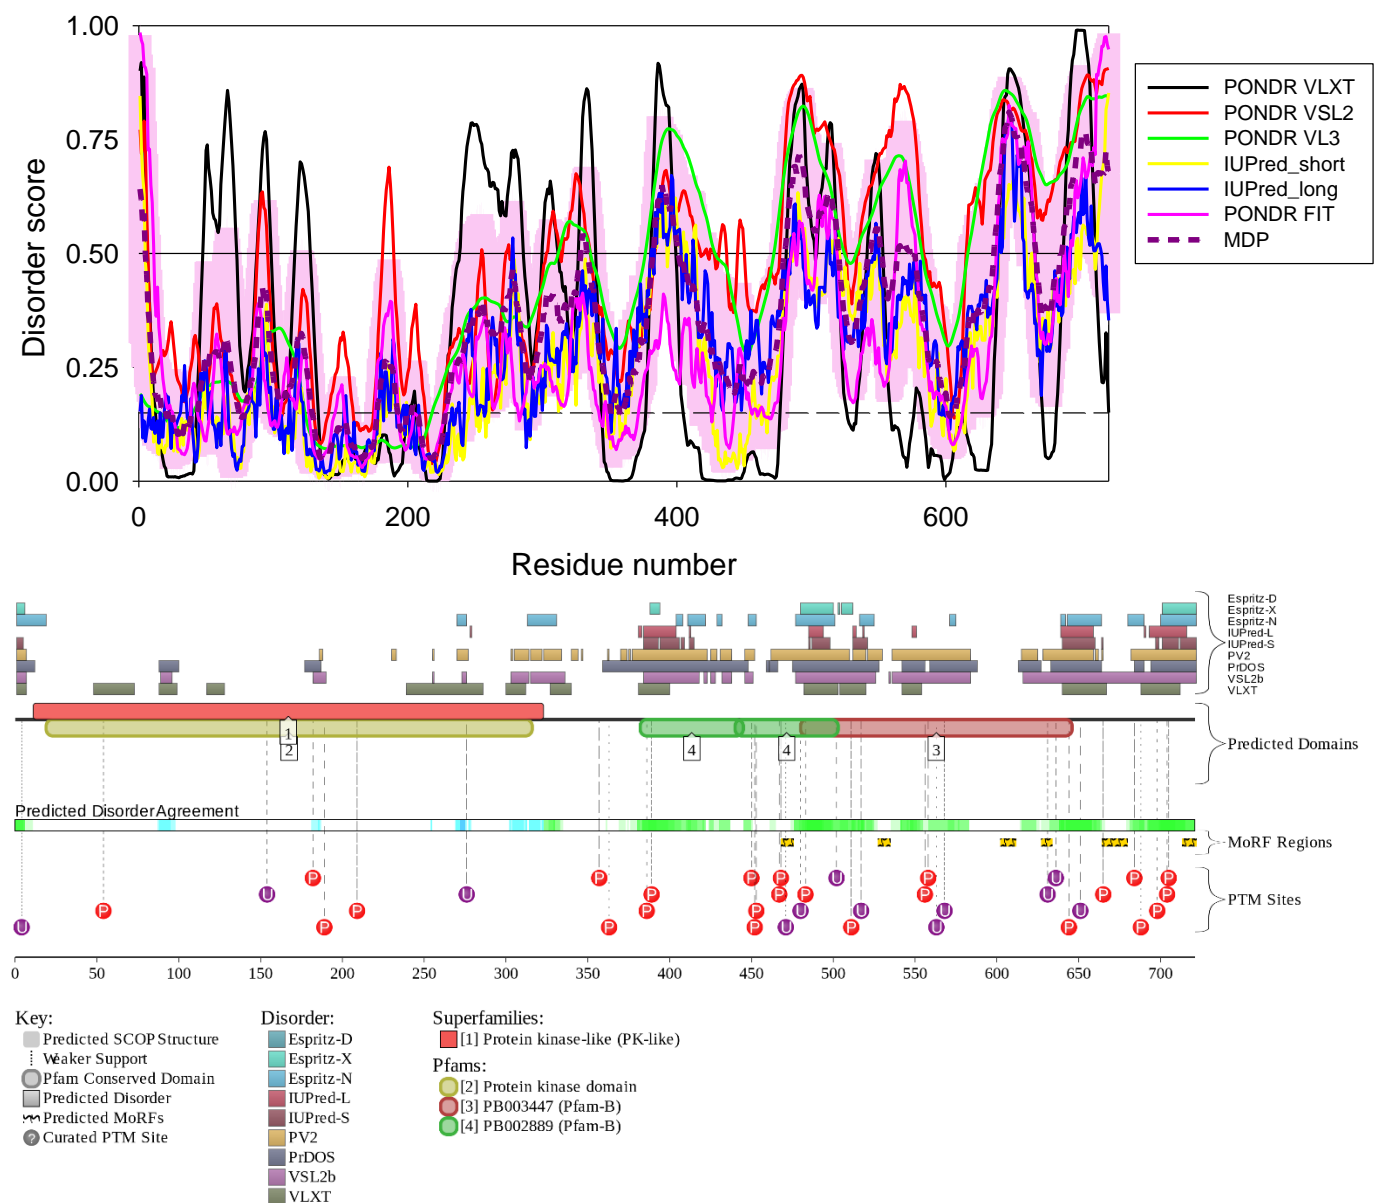

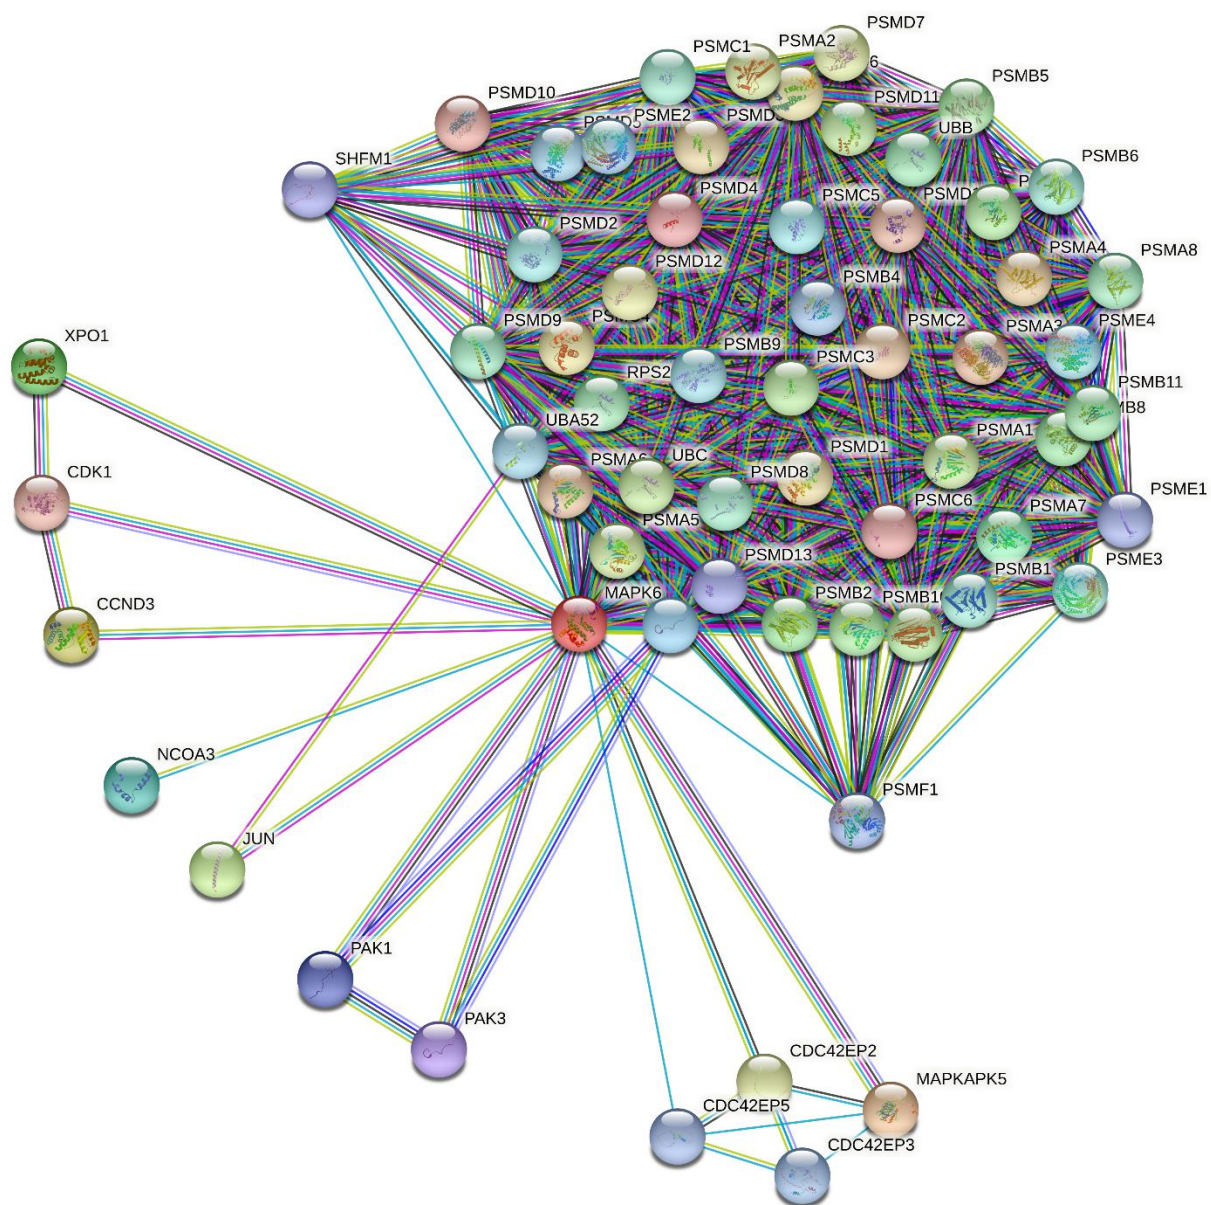



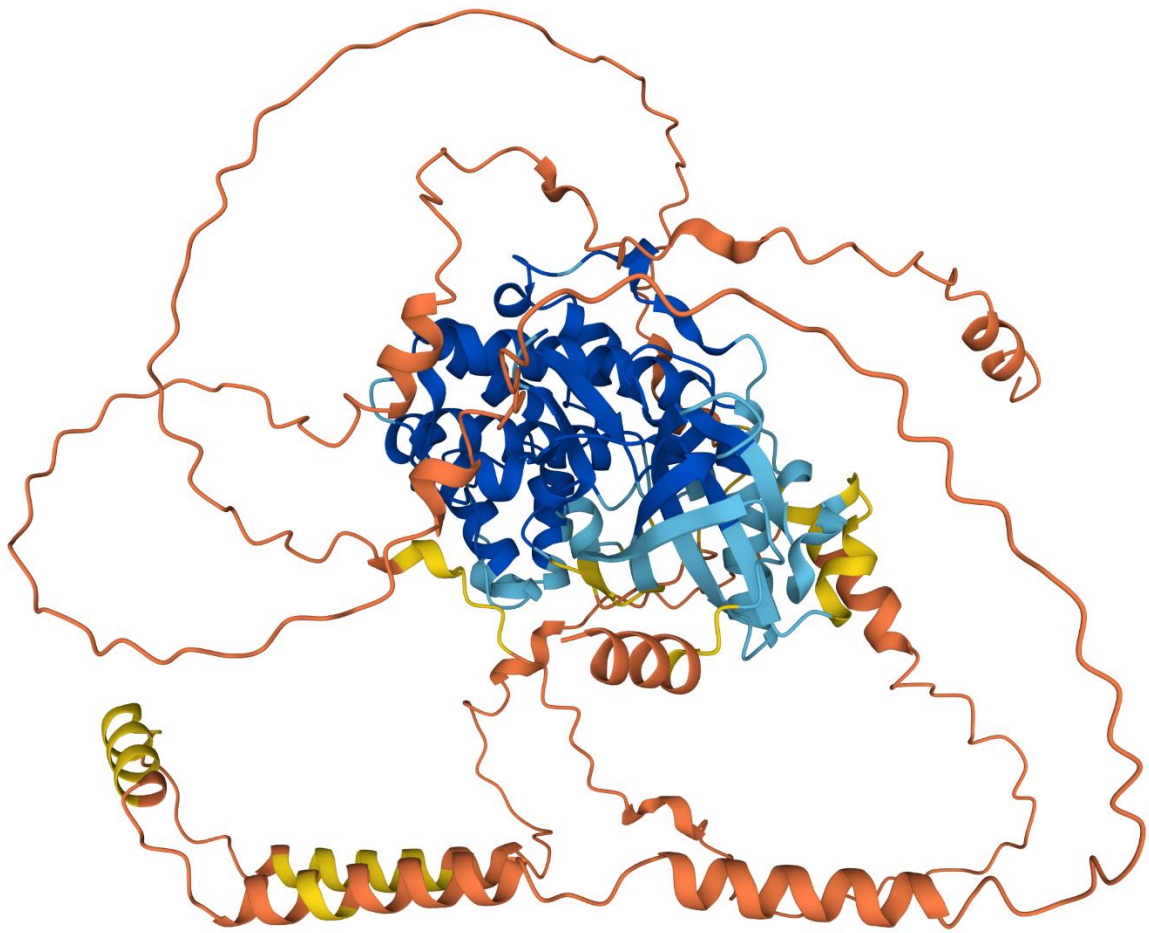

```

>sp|Q13164|MK07_HUMAN Mitogen-activated protein kinase 7 OS=Homo sapiens OX=9606
GN=MAPK7 PE=1 SV=2
MAEPLKEEDGEDGSAEPPGPVKAEPAPHTAASVAAKNLALLKARSFDVTFDVGDEYEIIETIGNGAYGVVSSARRRLTGQQVAIKK
IPNAFVVTNAKRTLRELKILKHFKHDNIIAIKDILRPTVPYGEFKSVYVVLDMESDLHQIIHSSQPLTLEHVRYFLYQLLRGL
KYMHSAQVIHRDLKPSNLLVNENCELKIGDFGMARGLCSPAHEQYFMTEYVATRWYRAPELMLSLHEYTQAIDLWSVGCIFGEM
LARRQLFPGKKNYVHQLQLIMMVLTGTPSPAVIQAVGAERVRAIYQSLPPRQPVWETVYPGADRQALSLLGRMLRFEP SARISAAA
ALRHPFLAKYHDPDDEPDCAFPDFDAFDREALTRERIKEAIVAEIEDFHARREGIRQQIRFQPSLQPVASEPGCPDVEMPSPWAP
SGDCAMESPPPPPPPCPGPAPDTIDLTLQPPPPVSEPPPKKDGAI SDNTKAALKAALLKSLRSRLRDGPSAPLEAPEPRKPVTA
QERQREREKRRRRQERAKEREKRRQERERKERGAGASGGPSTDPLAGLVLSNDNRSLLERWTRMARPAAPALTSVPAPAPAPT
TPTPVQPTSPPPGPVAQPTGPPQPSAGSTSGPVPQPACPPPGPAPHPTGPPGPIPVAPPQIATSTSLAAQSLVPPPGPLPGSST
PGVLPYFPPGLPPPDAAGAPQSSMSESPDNLVTQQLSKSQVEDPLPPVFSGTPKSGAGYGVGFDLEEFNLQSFDMGVADGPDQD
GQADSASLSASLLADWLEGHGMNPADIESLQREIQMDSPMLLADLPDLQDP

```

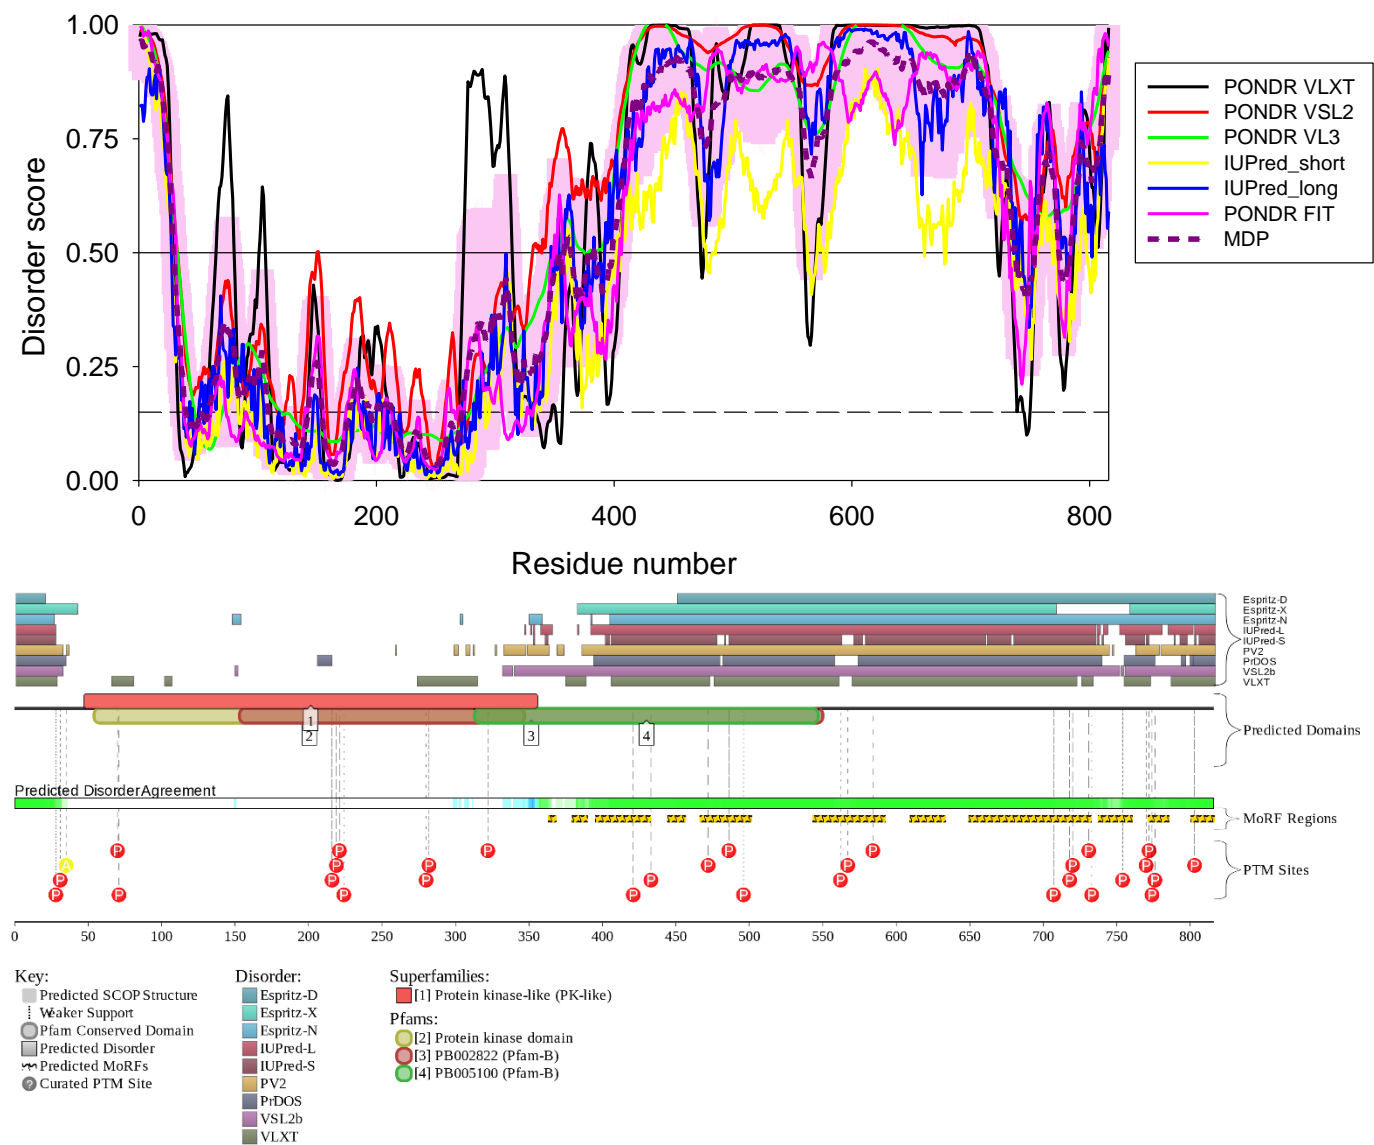

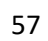



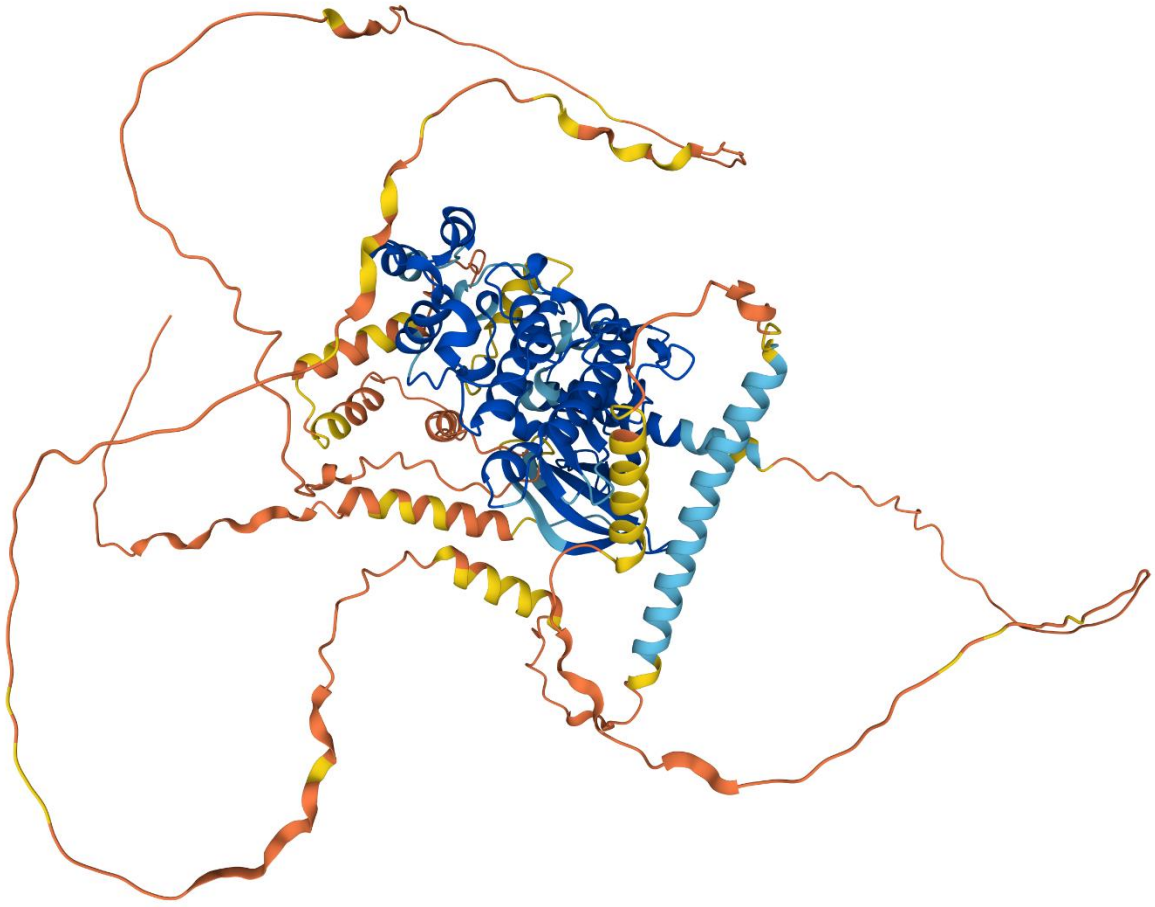



```
>sp|P45983|MK08_HUMAN Mitogen-activated protein kinase 8 OS=Homo sapiens OX=9606
GN=MAPK8 PE=1 SV=2
MSRSKRDNNFYSVEIGDSTFTVLKRYQNLKPIGSGAQGIVCAAYDAILERNVAIKKLSRPFQNTAKRAYRELVLKMCVNHKNI
IGLLNVFTFPQKSLEEFQDVYIVMELMDANLCQVIQMELDHERMSYLLYQMLCGIKHLHSAGIIHRDLKPSNIVVKS DCTLKILDF
GLARTAGTSFMMTPYVVTRYRAPEVILGMGYKENVDLWSVGCIMGEMVCHKILFPGRDYIDQWNKVIEQLGTPCFEFMKKLQPT
VRTYVENRPKYAGYSFEKLFDPDLFPADSEHNKLKASQARDLLSKMLVIDASKRISVDEALQHPYINVWYDPSEAEAPPPKIPDK
QLDEREHTIEEWKELIYKEVMDLEERTKNGVIRGQPSPLGAAVINGSQHPSSSSSVNDVSSMSTDPTLASDTDSLEAAAGPLGC
CR
```

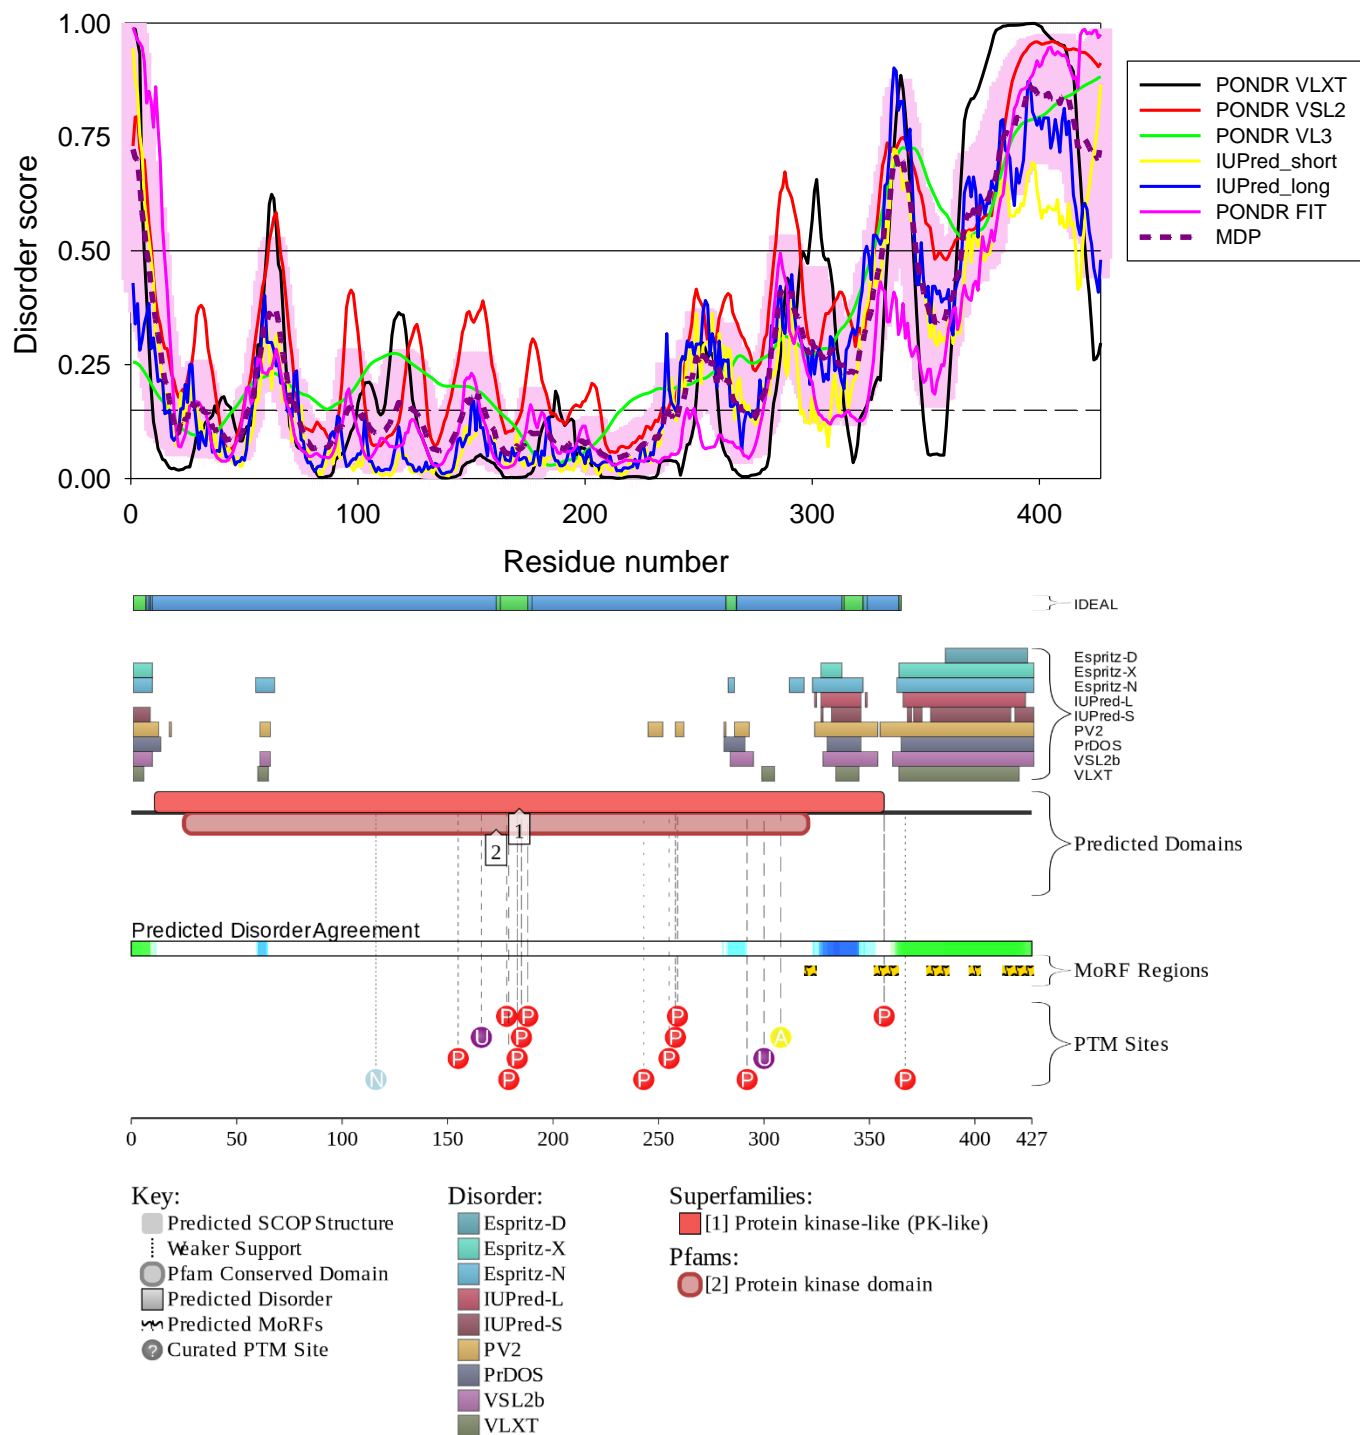

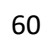

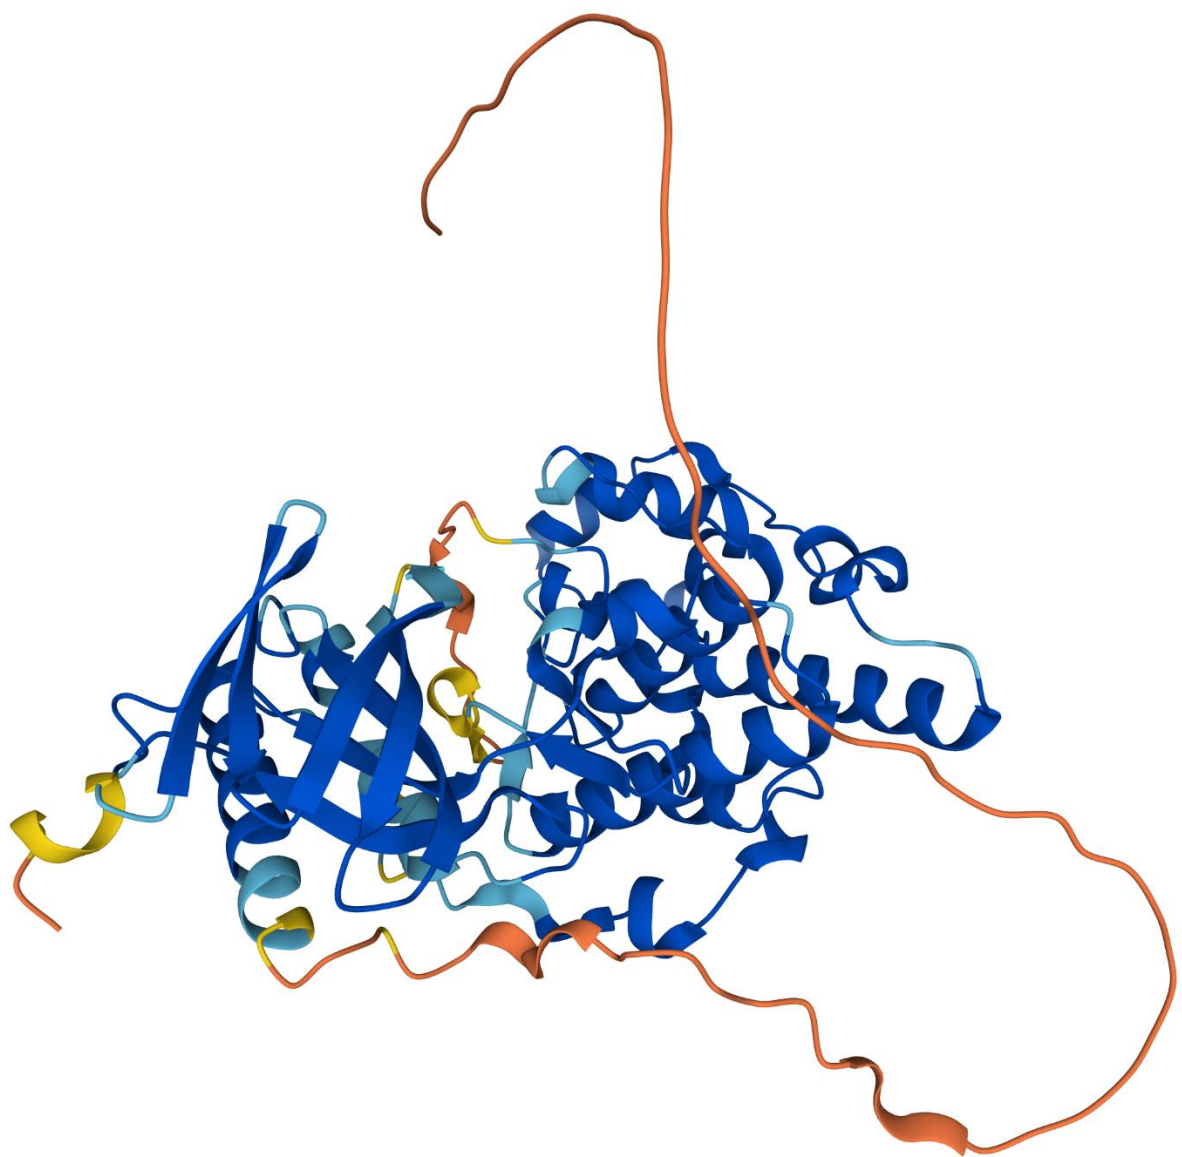



```
>sp|P45984|MK09_HUMAN Mitogen-activated protein kinase 9 OS=Homo sapiens OX=9606
GN=MAPK9 PE=1 SV=2
MSDSKCDSQFYYSVQVADSTFTVLKRYQQLKPIGSGAQGIVCAAFDTVLGINVAVKKLSRPFQNTAKRAYRELVLKCVNHKNI
ISLLNVFTFPQKTLEEFQDVYLVMEELMDANLCQVIHMELDHERMSYLLYQMLCGIKHLHSAGIIHRDLKPSNIVVKS DCTLKILDF
GLARTACTNFMMPYPYVVTRYRAPEVILGMGYKENVDIWSVGCIMGELVKGCVIFQGTDHIDQWNKVIEQLGTPSAEFMKKLQPT
VRNYVENRPKYPGIKFEELFPDWIFPSESERDKIKTSQARDLLSKMLVIDPDKRISVDEALRHPYITVWYDPAEAEAPPPQIYDA
QLEEREHAIEEWKELIYKEVMDWEERSKNGVVKDQPSDAAVSSNATPSQSSSINDISSMSTEQTLASDTSDDLASTGPLEGCR
```

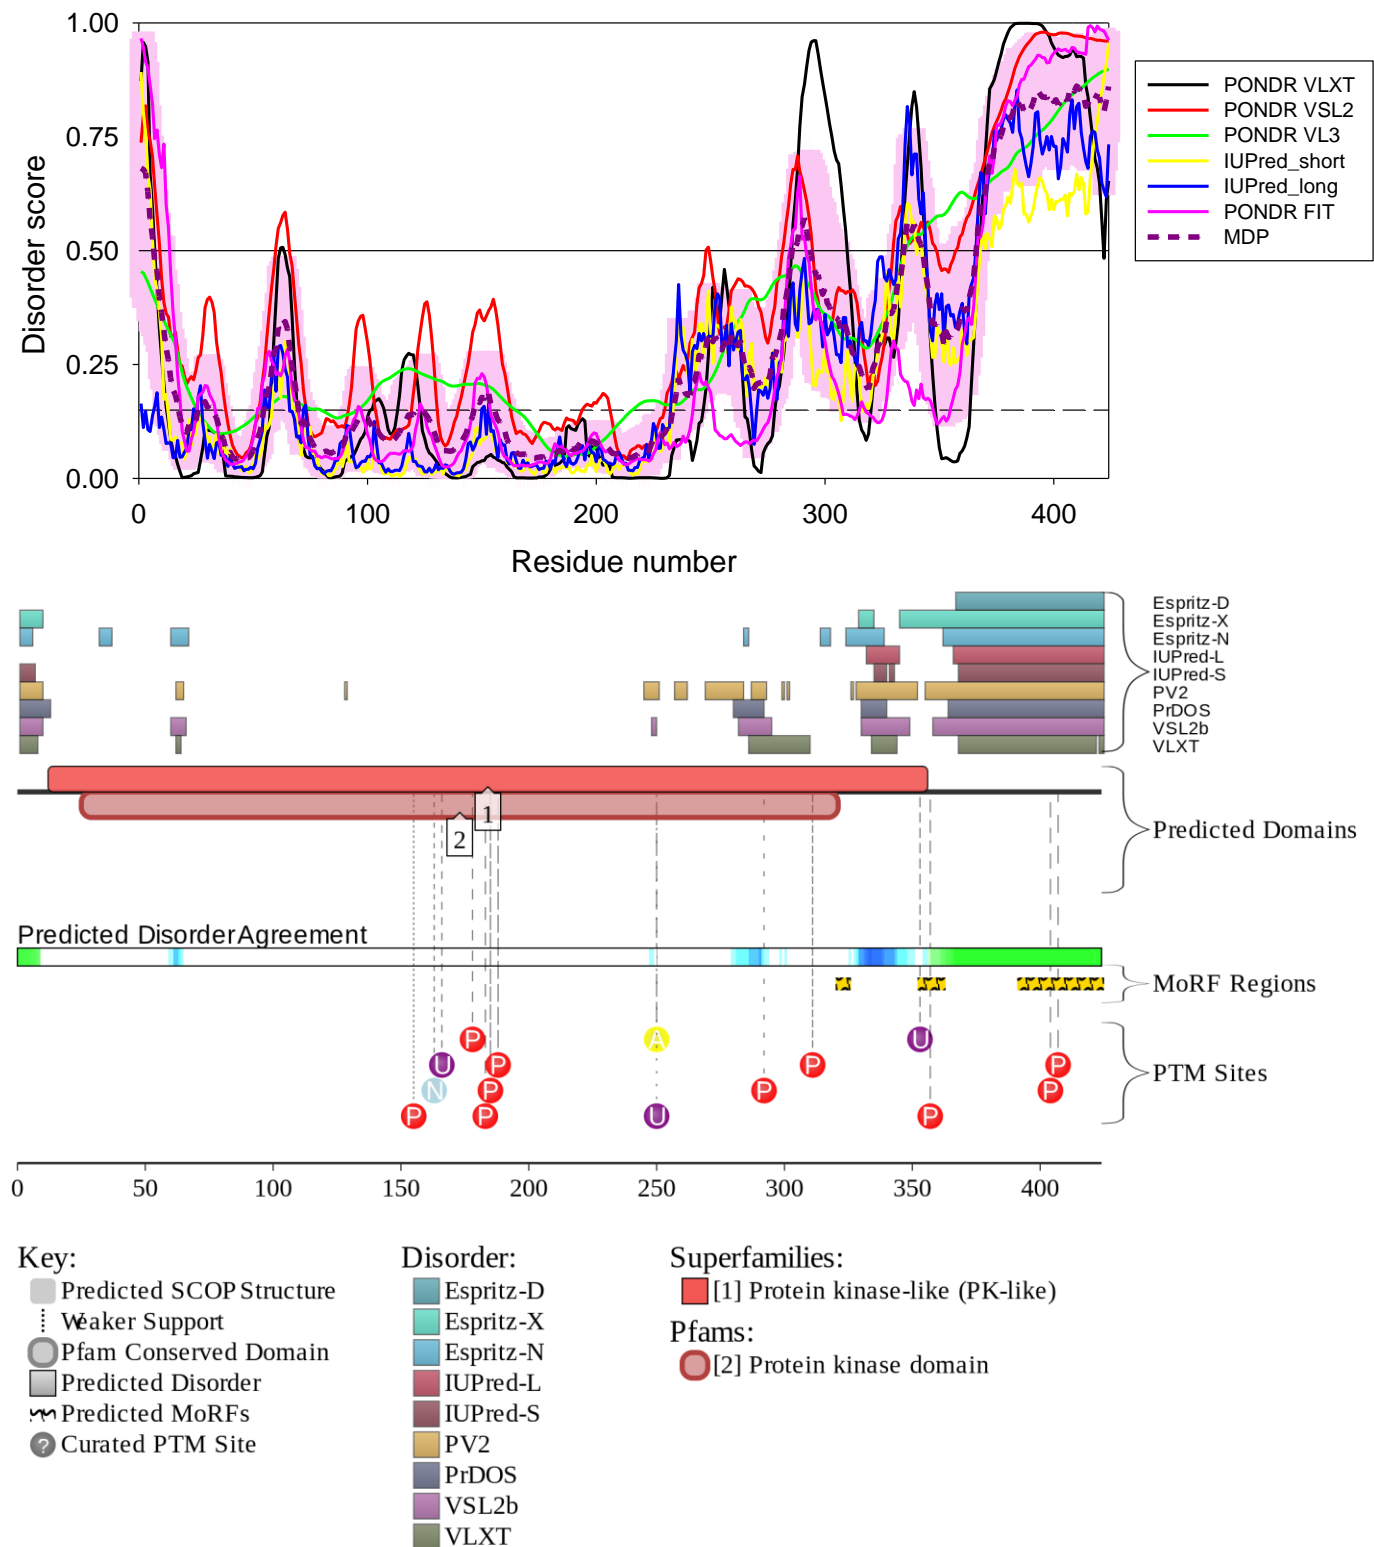





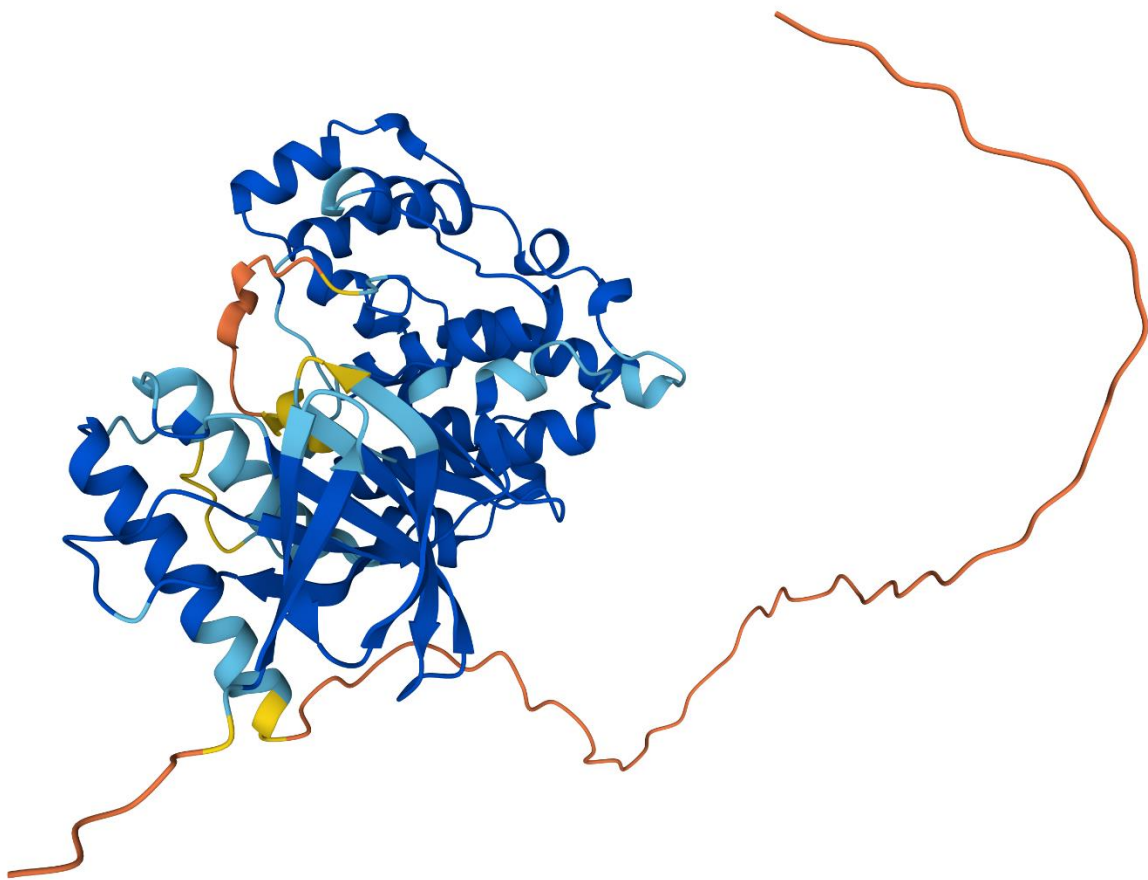

>sp|P53779|MK10\_HUMAN Mitogen-activated protein kinase 10 OS=Homo sapiens OX=9606  
 GN=MAPK10 PE=1 SV=2  
 MSLHFLYYCSEPTLDVKIAFCQGFDKQVDVSYIAKHYNMSKSKVDNQFYFYSVEVG DSTFTVLKRYQNLKPIGSGAQGGIVCAAYDAV  
 LDRNVAIKKLSRPFQNTAKRAYRELVL MKCVNHKNIISLLNVFTPQKTLEEFQDVYLVME LMDANLCQVIQMELDHERMSYLL  
 YQMLCGIKHLHSAGIIHRDLKPSNIVVKS DCTLKILDFGLARTAGTSFMMTPYVVTRYRAPEVILGMGYKENVDIWSVGCIMGE  
 MVRHKILFPGRDYIDQWNKVIEQLGTPCPEFMKKLQPTVRNYVENRPKYAGLTFFPKLFPDSLFPADSEHNK LKASQARDLLSKML  
 VIDPAKRISVDDALQHPYINVWYDPAEVEAPPPQIYDKQLDEREHTIEEWKELIYKEVMNSEEKTKNGVVKGQPSPSGA AVNSSE  
 SLPPSSSVNDISSMSTDQTLASDTDS SLEASAGPLGCCR

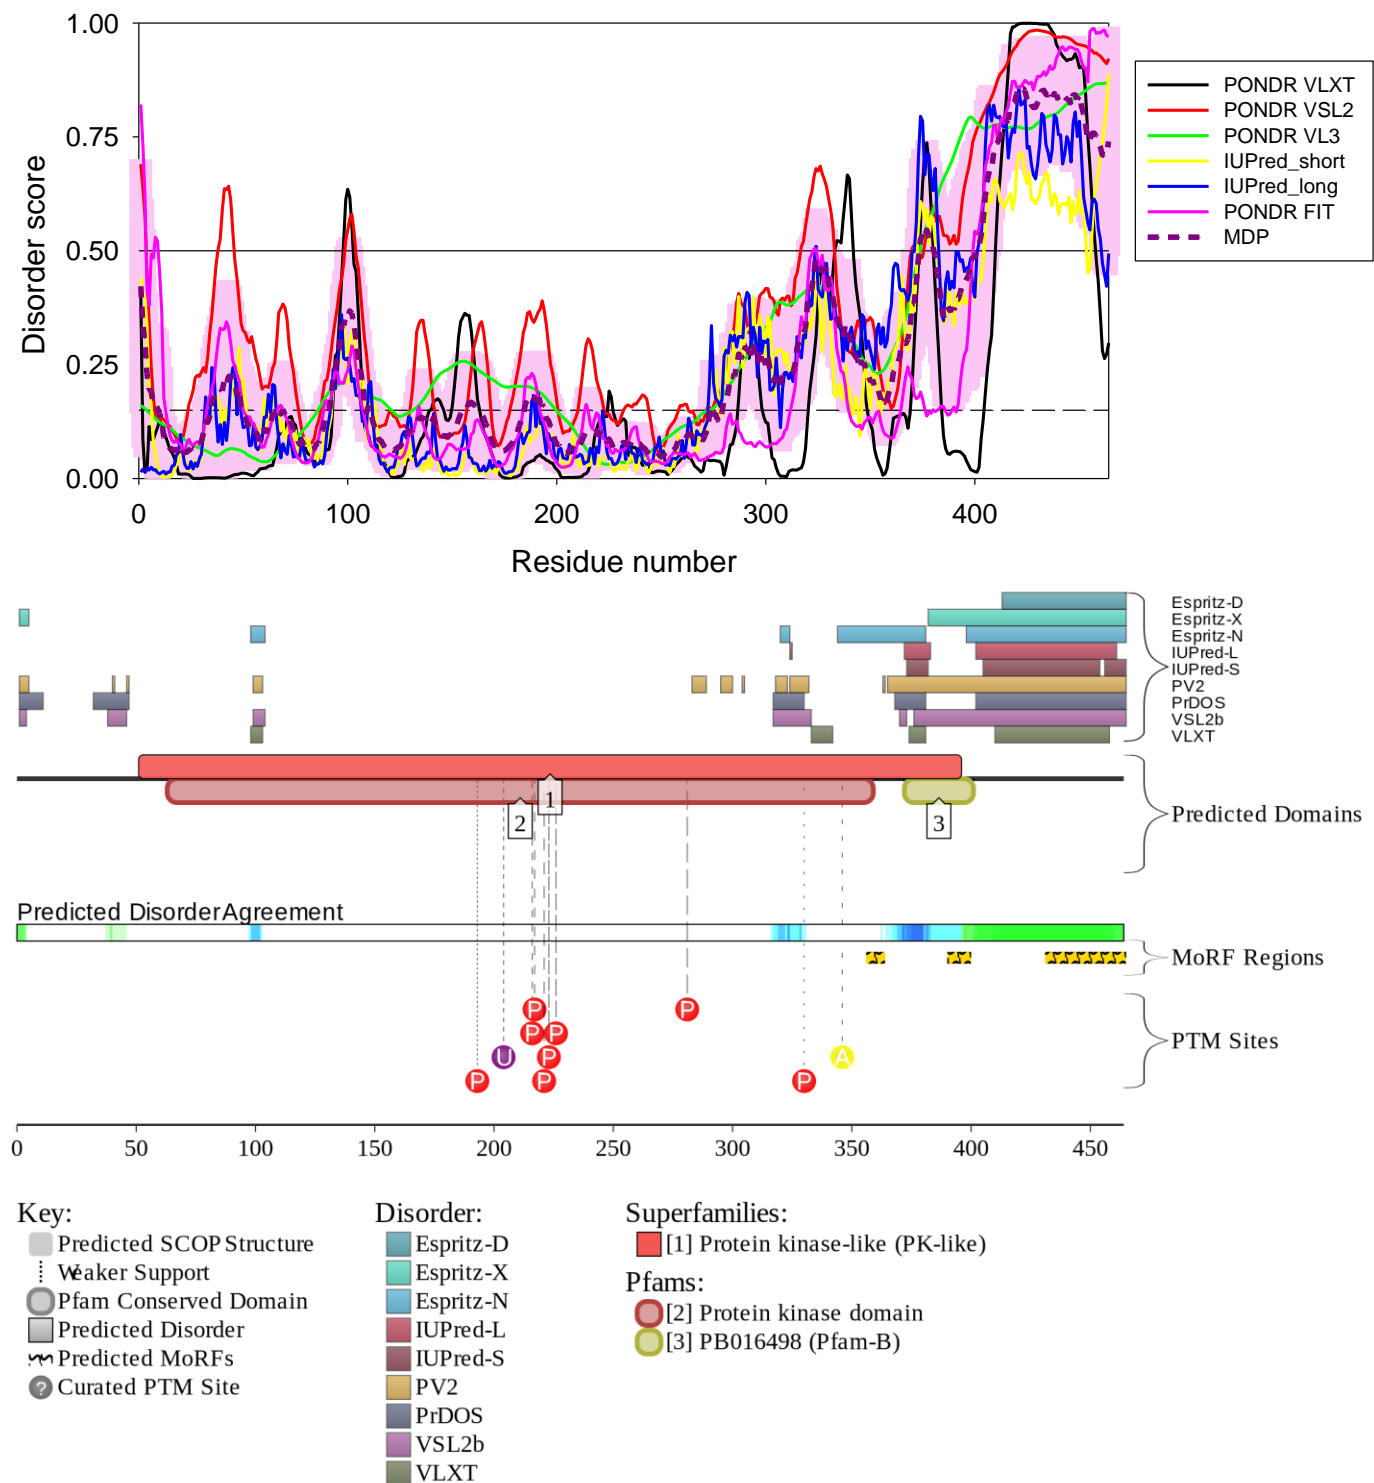



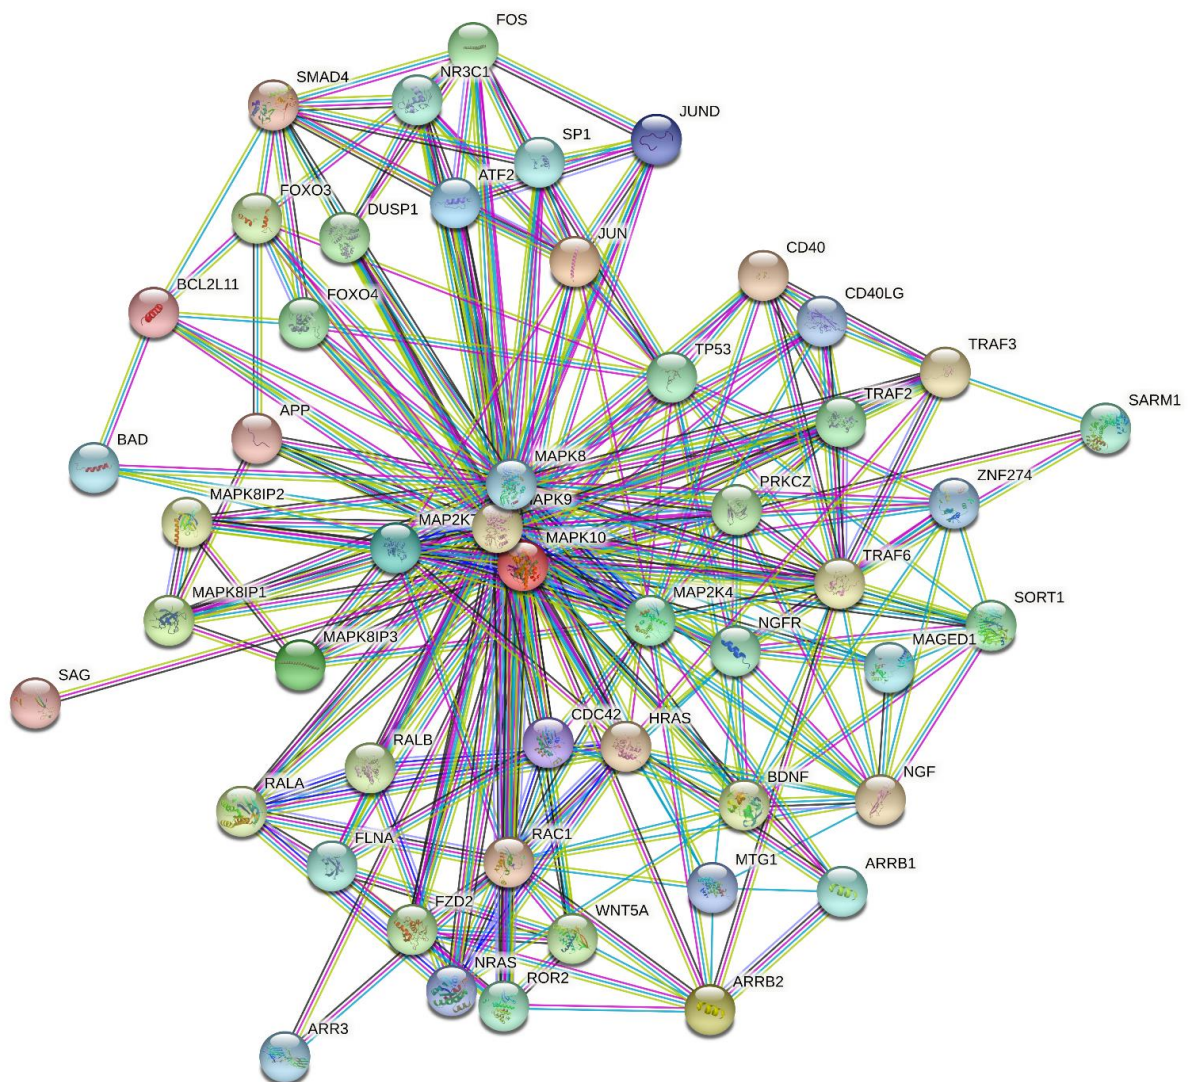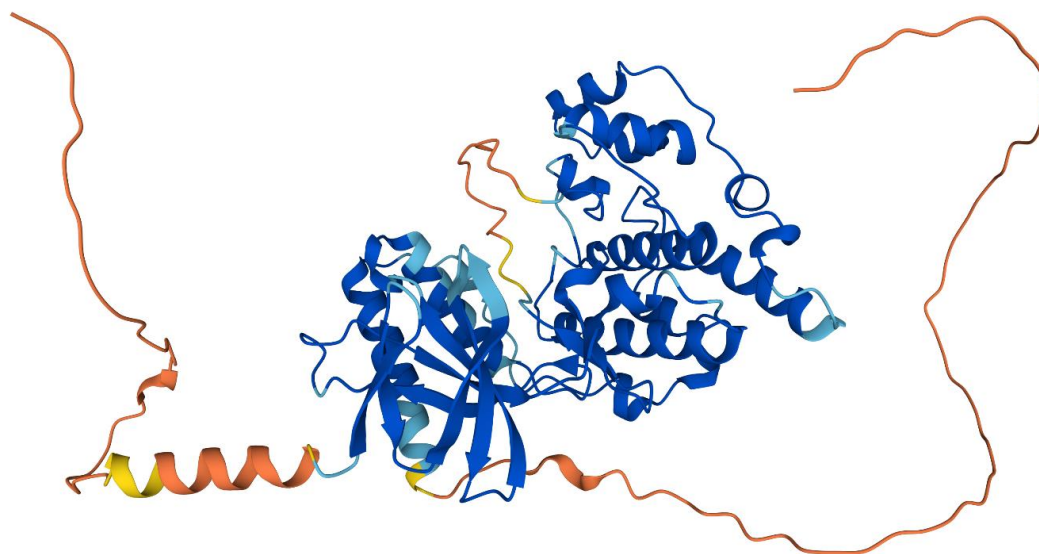



```
>sp|Q15759|MK11_HUMAN Mitogen-activated protein kinase 11 OS=Homo sapiens OX=9606
GN=MAPK11 PE=1 SV=2
MSGPRAGFYRQELNKTVEVPQRLQGLRPVGSAGYGSVC SAYDARLRQKVAVKKLSRPFQSLIHARRTYRELRLKHLKHENVIG
LLDVFTPATSIEDFSEVYLVTTLMGADLNNIVKCQALSDEHVQFLVYQLLRGLKYIHSAGIIHRDLKPSNVAVNEDCELRIIDFG
LARQADEEMTGYVATRWYRAPEIMLNWMHYNQTVDIWSVGCIMAE LLQGKALFPGSDYIDQLKRIMEVVGTPSPEVLAKISSEHA
RTYIQSLPPMPQKDLSSIFRGANPLAIDLLGRMLVLVLDSDQRVSA AEALAHAYFSQYHDPEDPEPEAEPYDESVEAKERTLEEWKEL
TYQEVLSFKPPEPPKPPGSLEIEQ
```

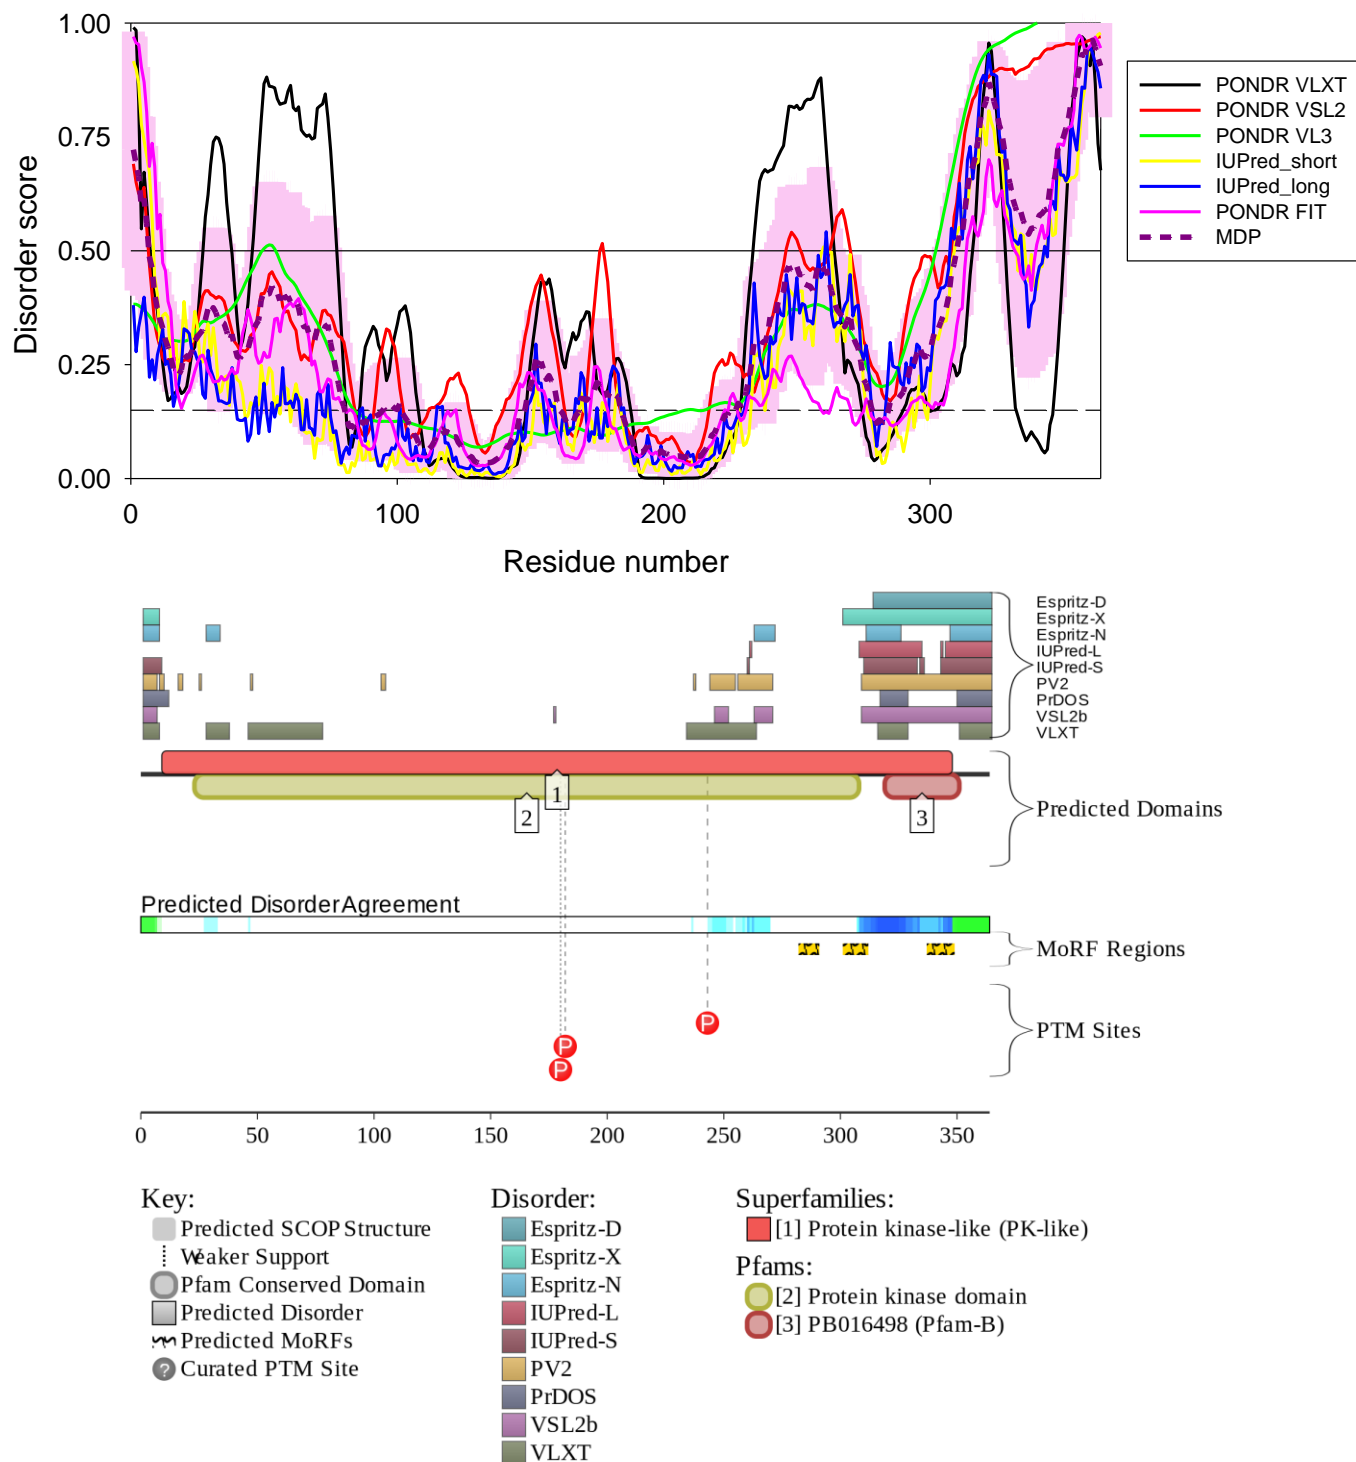



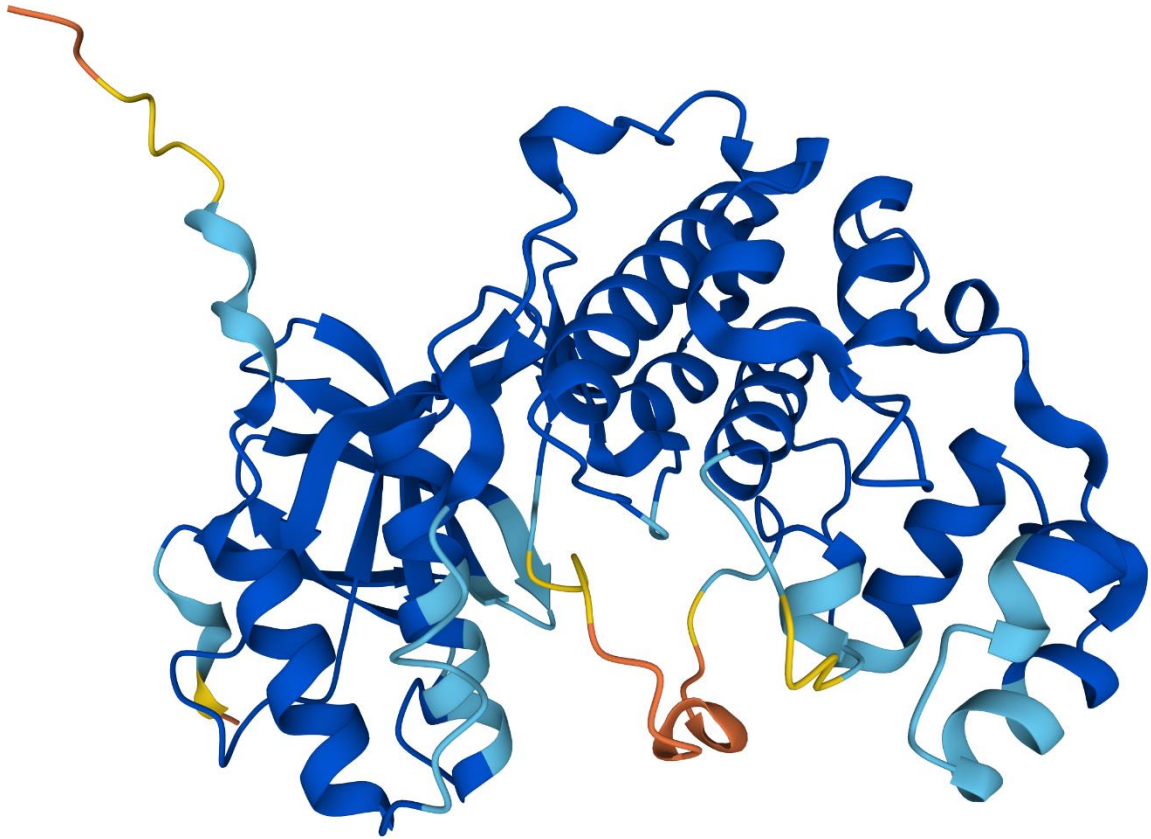



```
>sp|P53778|MK12_HUMAN Mitogen-activated protein kinase 12 OS=Homo sapiens OX=9606
GN=MAPK12 PE=1 SV=3
MSSPPPARSGFYRQEVTKTAWEVRAVYRDLQPVGSGAYGAVCSAVDGRGTGAKVAIKKLYRPFQSELF AKRAYRELRL LKHM RHE N
VIGLLDVFTPD ETLDDFTDFYLVM PFMGTD LGKLMKHEKLGEDRIQFLVYQMLKGLRYIHAAGIIHRDLKPGNLAVNEDCELKIL
DFGLARQADSEMTGYVVTRWYRAPEVILNWMRYTQTVDIWSVGCIMAEMITGKTLFKGSDHLDQLKEIMKVTGTPPAEFVQRLQS
DEAKNYMKGLPELEKKDFASILTNASPLAVNLLKMLVLDAEQRV TAGEALAH P YFESLHDTEDEPQVQKYDDSFDDVDRTLDEW
KRVTYKEVLSFKPPRQLGARVSKETPL
```

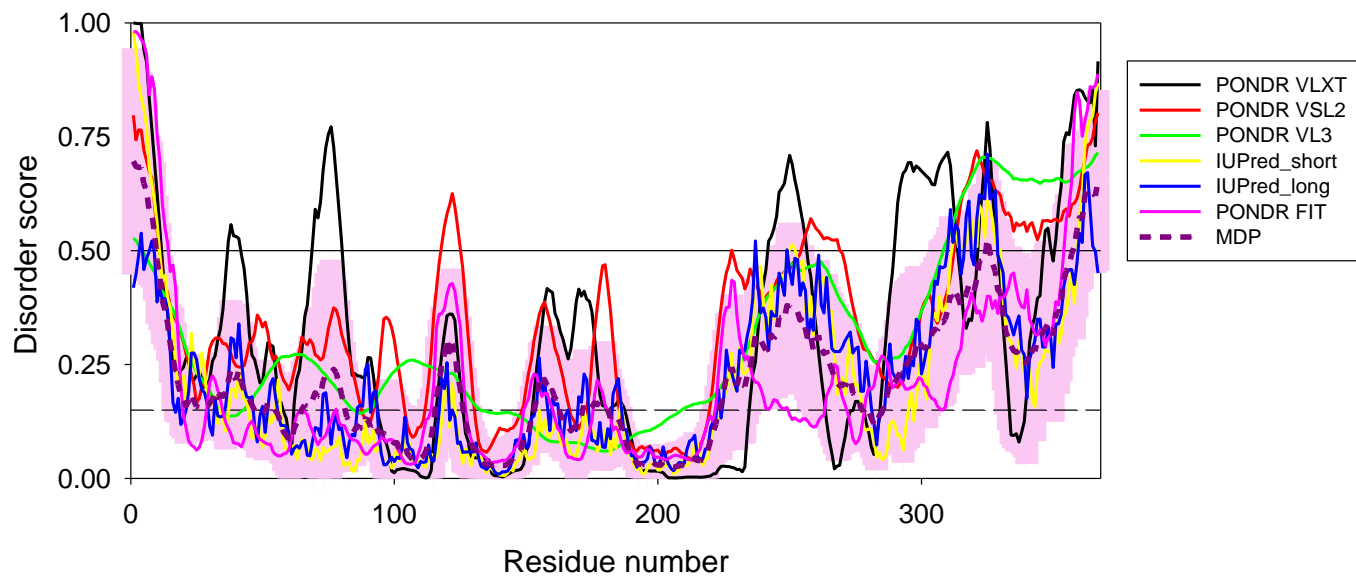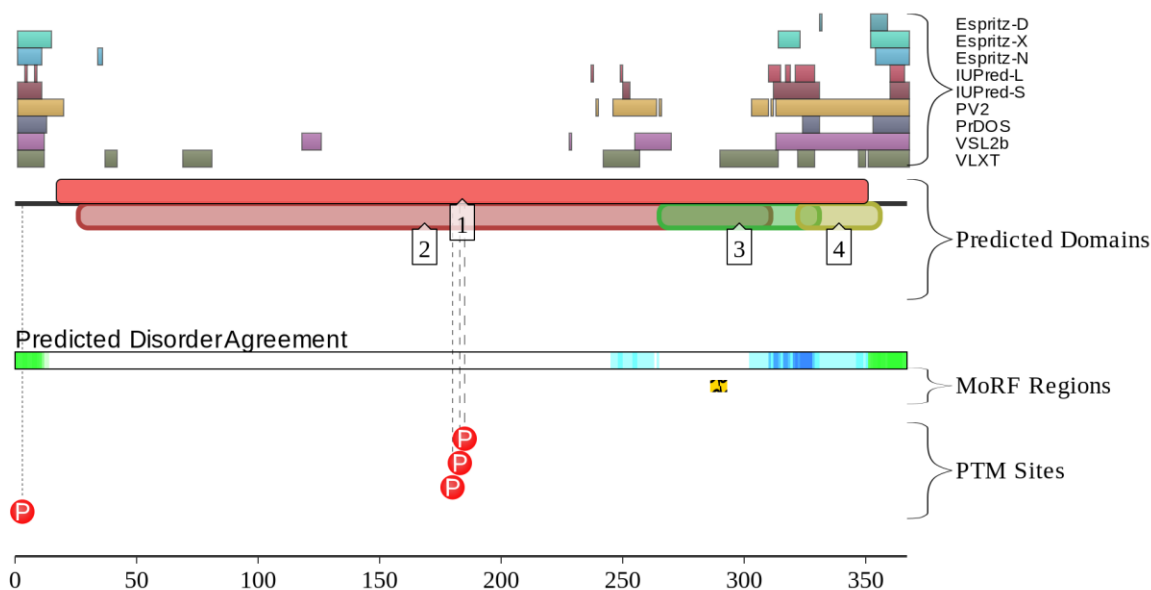

**Key:**

- Predicted SCOP Structure
- ⋯ Weaker Support
- Pfam Conserved Domain
- Predicted Disorder
- ⋯ Predicted MoRFs
- ⊙ Curated PTM Site

#### Disorder:

- Espritz-D
- Espritz-X
- Espritz-N
- IUPred-L
- IUPred-S
- PV2
- PrDOS
- VSL2b
- VLXT

#### Superfamilies:

- [1] Protein kinase-like (PK-like)

#### Pfams:

- [2] Protein kinase domain
- [3] PB012322 (Pfam-B)
- [4] PB016498 (Pfam-B)

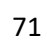

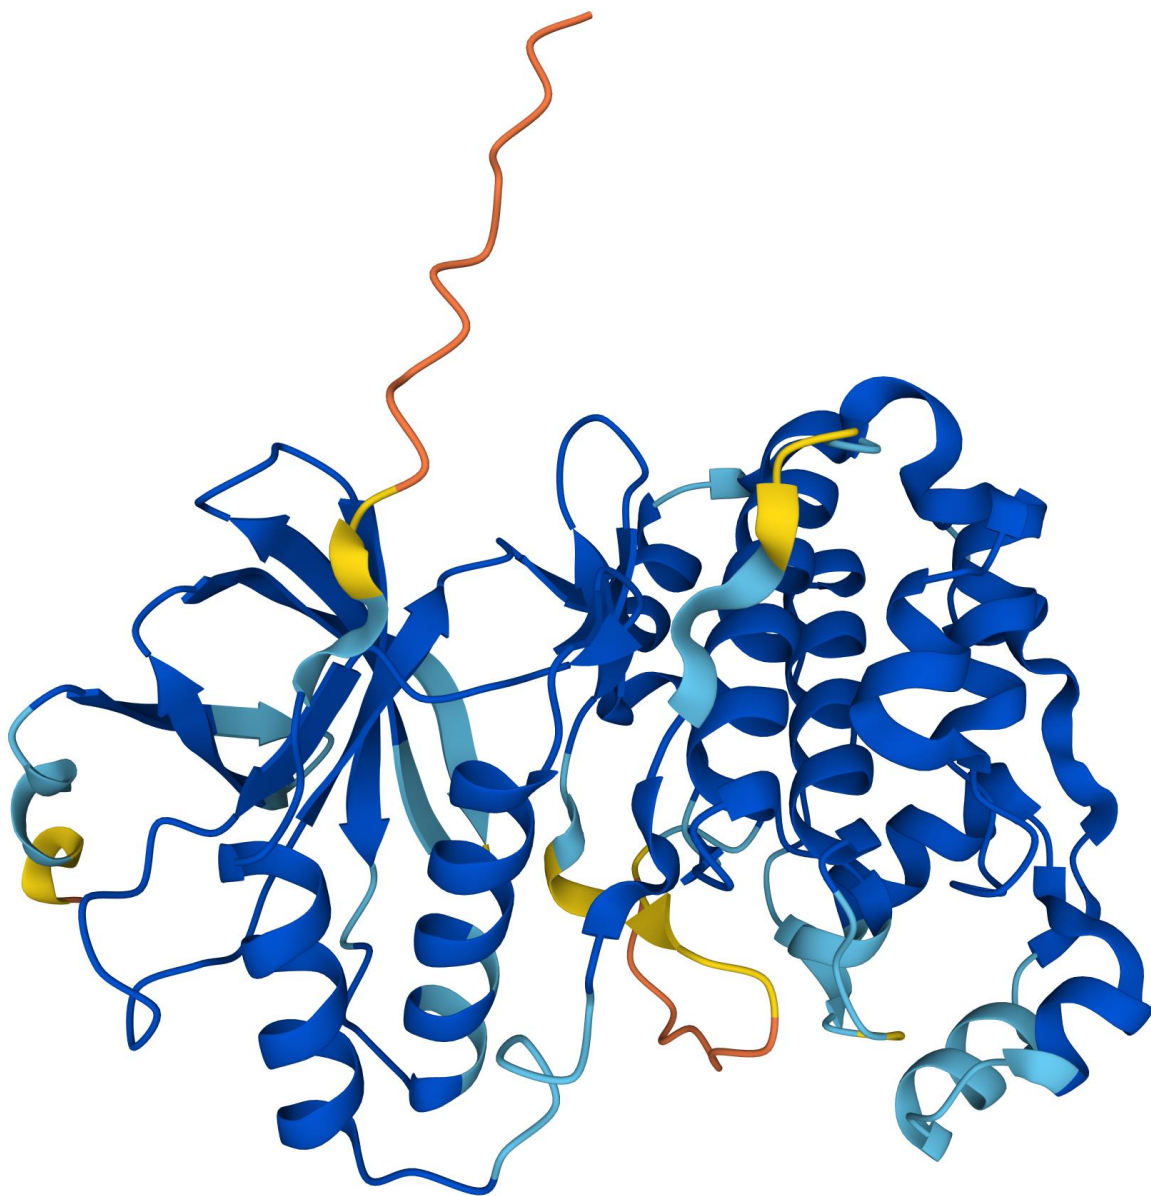



```
>sp|O15264|MK13_HUMAN Mitogen-activated protein kinase 13 OS=Homo sapiens OX=9606
GN=MAPK13 PE=1 SV=1
MSLIRKKGFYKQDVNKTAWELPKTYVSPTHVSGSGAYGSVCSAIDKRSGEKVAIKKLSRPFQSEIFAKRAYRELLLLLKHMQHENVI
GLLDVFTPASSLRNFYDFYLVMPFMQTDLQKIMGMEFSEEKIQYLVIYQMLKGLKYIHSAGVVHRDLKPGNLAVNEDCELKILDFG
LARHADAEMTGYVVTRWYRAPEVILSWMHYNQTVDIWSVGCIMAEMLTGKTLFKGKDYLDQLTQILKVTGVPGTEFVQKLNDKAA
KSYIQSLPQTPRKDFTQLFPRASPQAADLLEKMLELDVDKRLTAAQALTHPFFEPFRDPEEETEAAQQPFDDSL EHEKLTVD EWKQ
HIYKEIVNFSPIARKDSRRRSGMKL
```

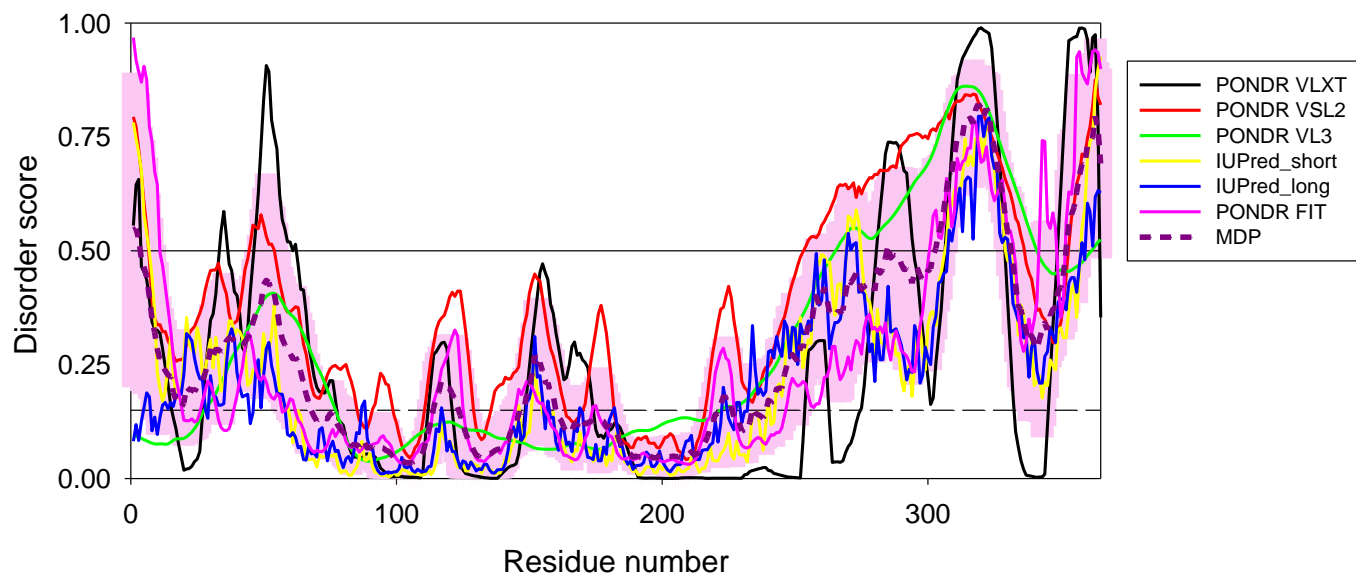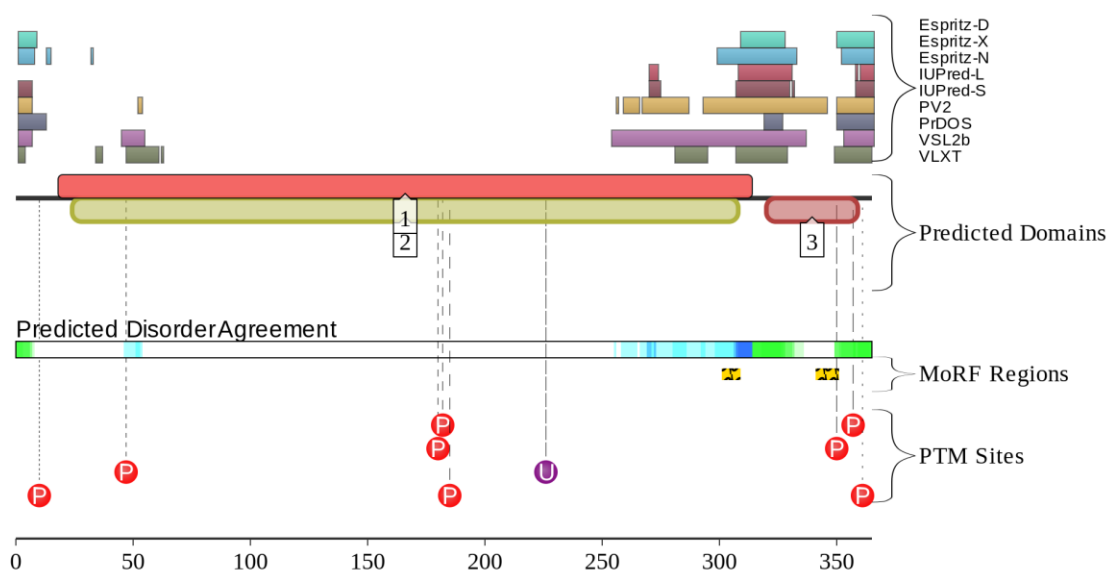

Key:

- Predicted SCOP Structure
- Weaker Support
- Pfam Conserved Domain
- Predicted Disorder
- Predicted MoRFs
- Curated PTM Site

Disorder:

- Espritz-D
- Espritz-X
- Espritz-N
- IUPred-L
- IUPred-S
- PV2
- PrDOS
- VSL2b
- VLXT

Superfamilies:

[1] Protein kinase-like (PK-like)

Pfams:

- [2] Protein kinase domain
- [3] PB016498 (Pfam-B)

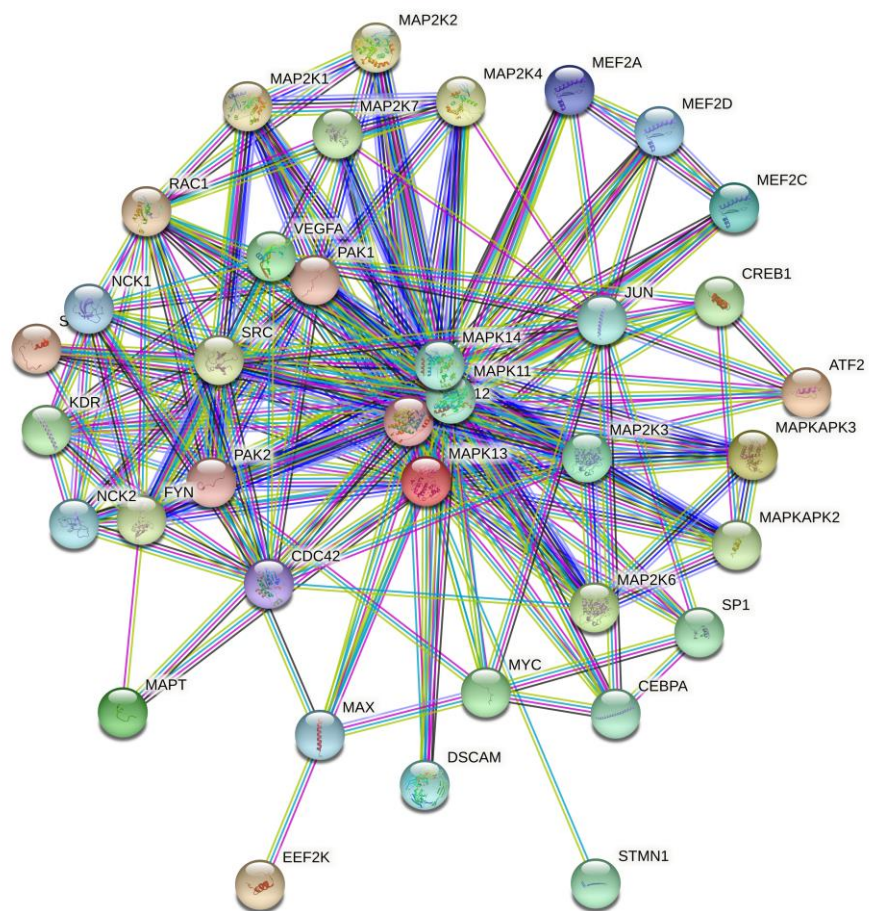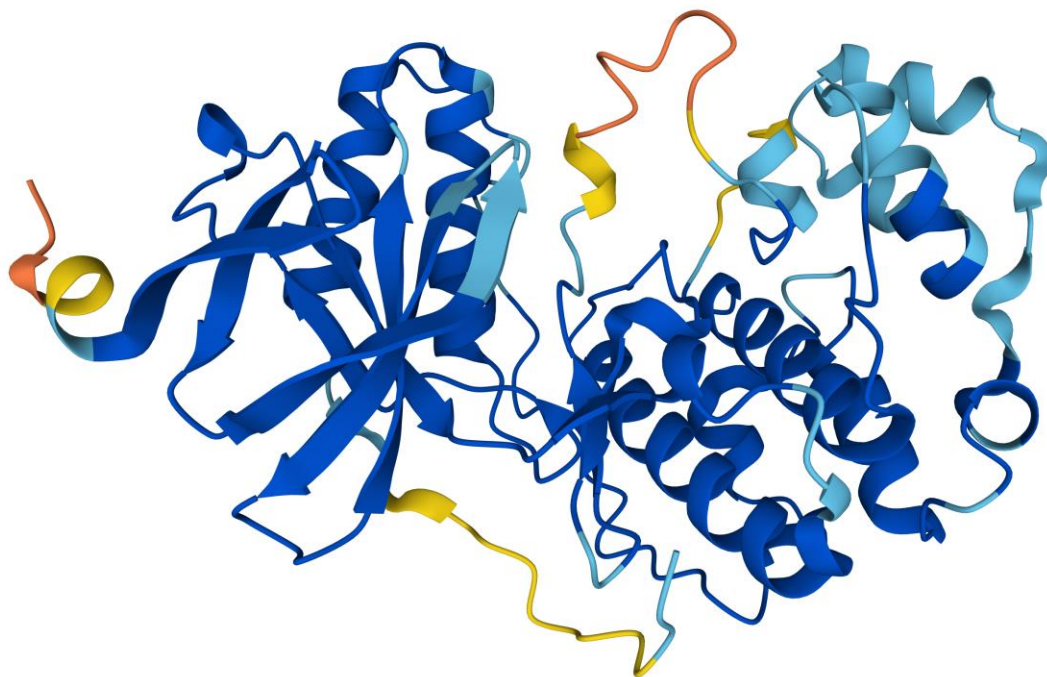

```
>sp|Q16539|MK14_HUMAN Mitogen-activated protein kinase 14 OS=Homo sapiens OX=9606
GN=MAPK14 PE=1 SV=3
MSQERPTFYRQELNKTIEWEPERYQNLSPVGSGAYGSGVCAAFDTKTGLRVAVKKLSRPFQSIIHAKRTYRELRLKHKHENVIG
LLDVFTPARSLEEFNDVYLVTHLMGADLNNIVKQCQLTDDHVQFLIYQILRGLKYIHSADIIHRDLKPSNLAVNEDCELKILDFG
LARHTDDEMTGYVATRWYRAPEIMLNWMHYNQTVDIWSVGCIMAEELLTGRTLFPGTDHIDQLKLILRLVGTPGAELLKKISSESA
RNYIQSLTQMPKMNFAVFIGANPLAVDLLEKMLVLDSDKRITAAQALAHAYFAQYHDPDDEPVADPYDQSFESRDLLIDEWKSL
TYDEVISFVPPPLDQEEMES
```

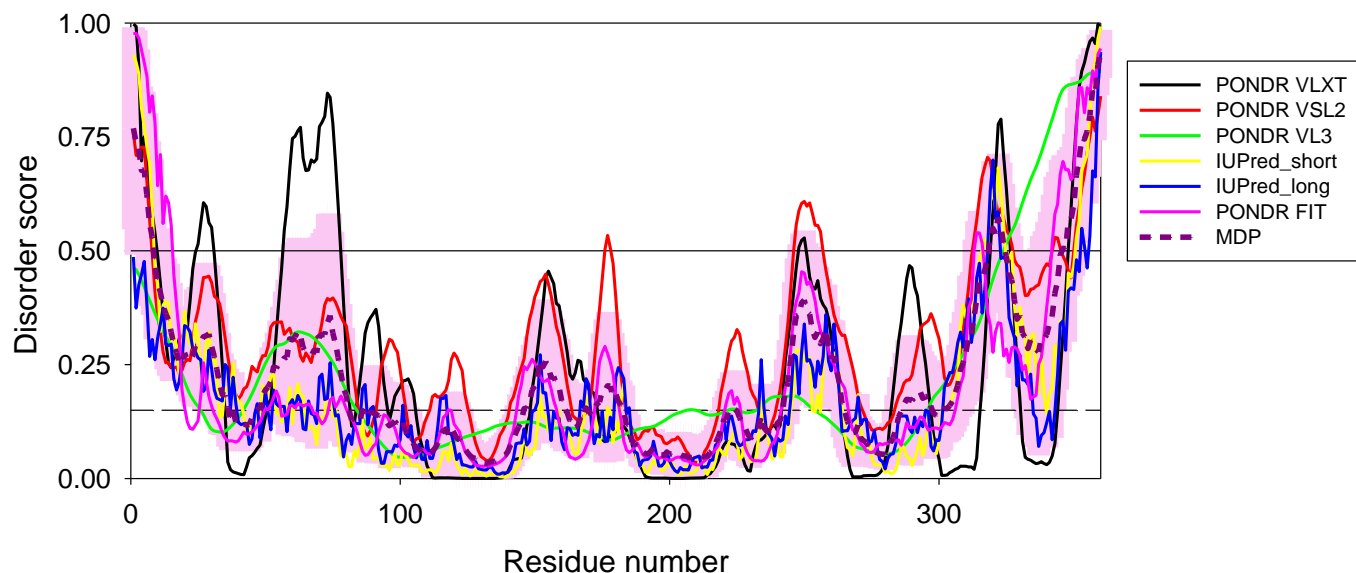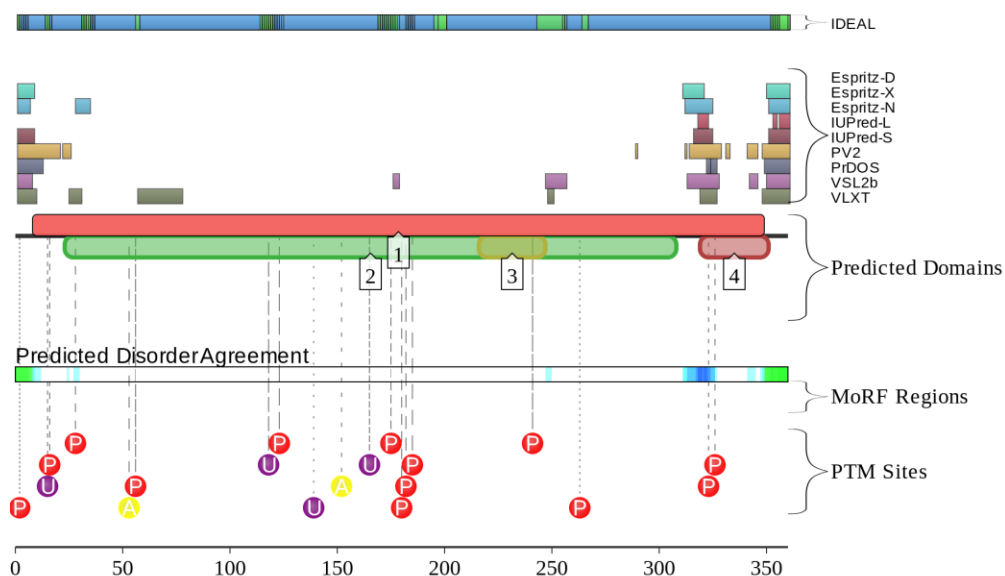

Key:

- Predicted SCOP Structure
- Weaker Support
- Pfam Conserved Domain
- Predicted Disorder
- Predicted MoRFs
- Curated PTM Site

Disorder:

- Espritz-D
- Espritz-X
- Espritz-N
- IUPred-L
- IUPred-S
- PV2
- PrDOS
- VSL2b
- VLXT

Superfamilies:

- [1] Protein kinase-like (PK-like)

Pfams:

- [2] Protein kinase domain
- [3] PB019783 (Pfam-B)
- [4] PB016498 (Pfam-B)





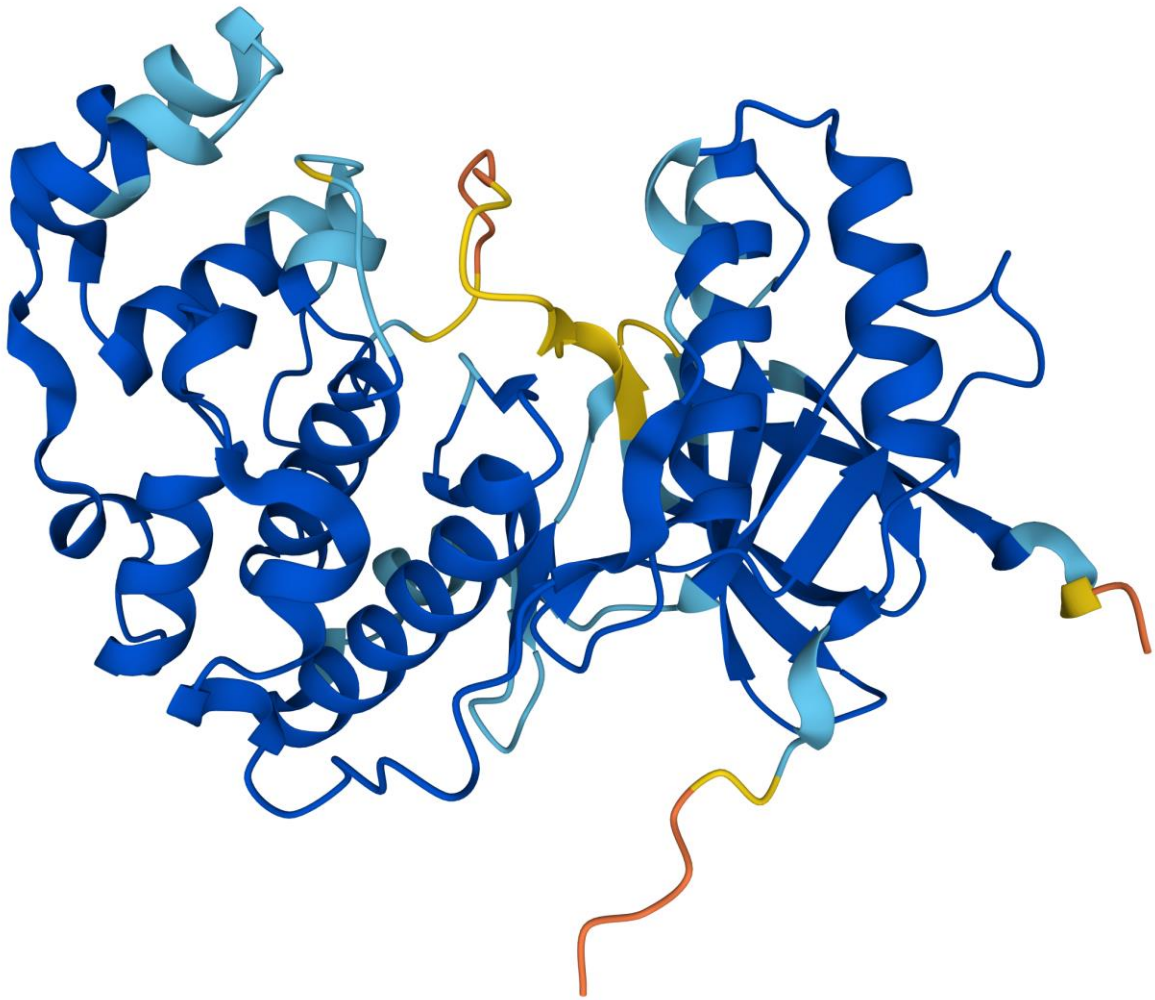

```
>sp|Q8TD08|MK15_HUMAN Mitogen-activated protein kinase 15 OS=Homo sapiens OX=9606
GN=MAPK15 PE=1 SV=1
MCTVVDPRIVRRYLLRRQLGQGAYGIVWKAVDRTGEVVAIKKIFDAFRDKTDAQRTFREITLLQEFQDHPNIIISLLDVIRAEND
RDIYLVFEFMDTDLNAVIRKGGLLQDVHVSIFYQLLRATRFLLHSGHVVRDQKPSNVLLDANCTVKLCDFGLARSLGDLPEGPE
DQAVTEYVATRWYRAPEVLLSSHRYTLGVDMWSLGCILGEMLRGRPLFPGTSTLHQLELILETIPPPSEEDLLALGSGCRASVLH
QLGSRPRQTL DALLPPDTSPEALDLLRRLLVFAPDKRLSATQALQHPYVQRFHCPSEDEAREADVPRPRAHEGVQLSVPEYRSRVY
QMILECGGSSGTSREKGPPEGVSPSQAHLHKPRADPQLPSRTPVQGP RPQPSSPGHDP AEHESPRAAKNVPRQNSAPLLQTALLG
NGERPPGAKEAPPLTSLVKPSGRGAAPSLTSQAAAQVANQALIRGDWNRGGGV RVASVQQVPPRLPPEARPGRRMFST SALQGA
QGGARALLGGYSQAYGTVCHSALGHLPLLEGGHV
```

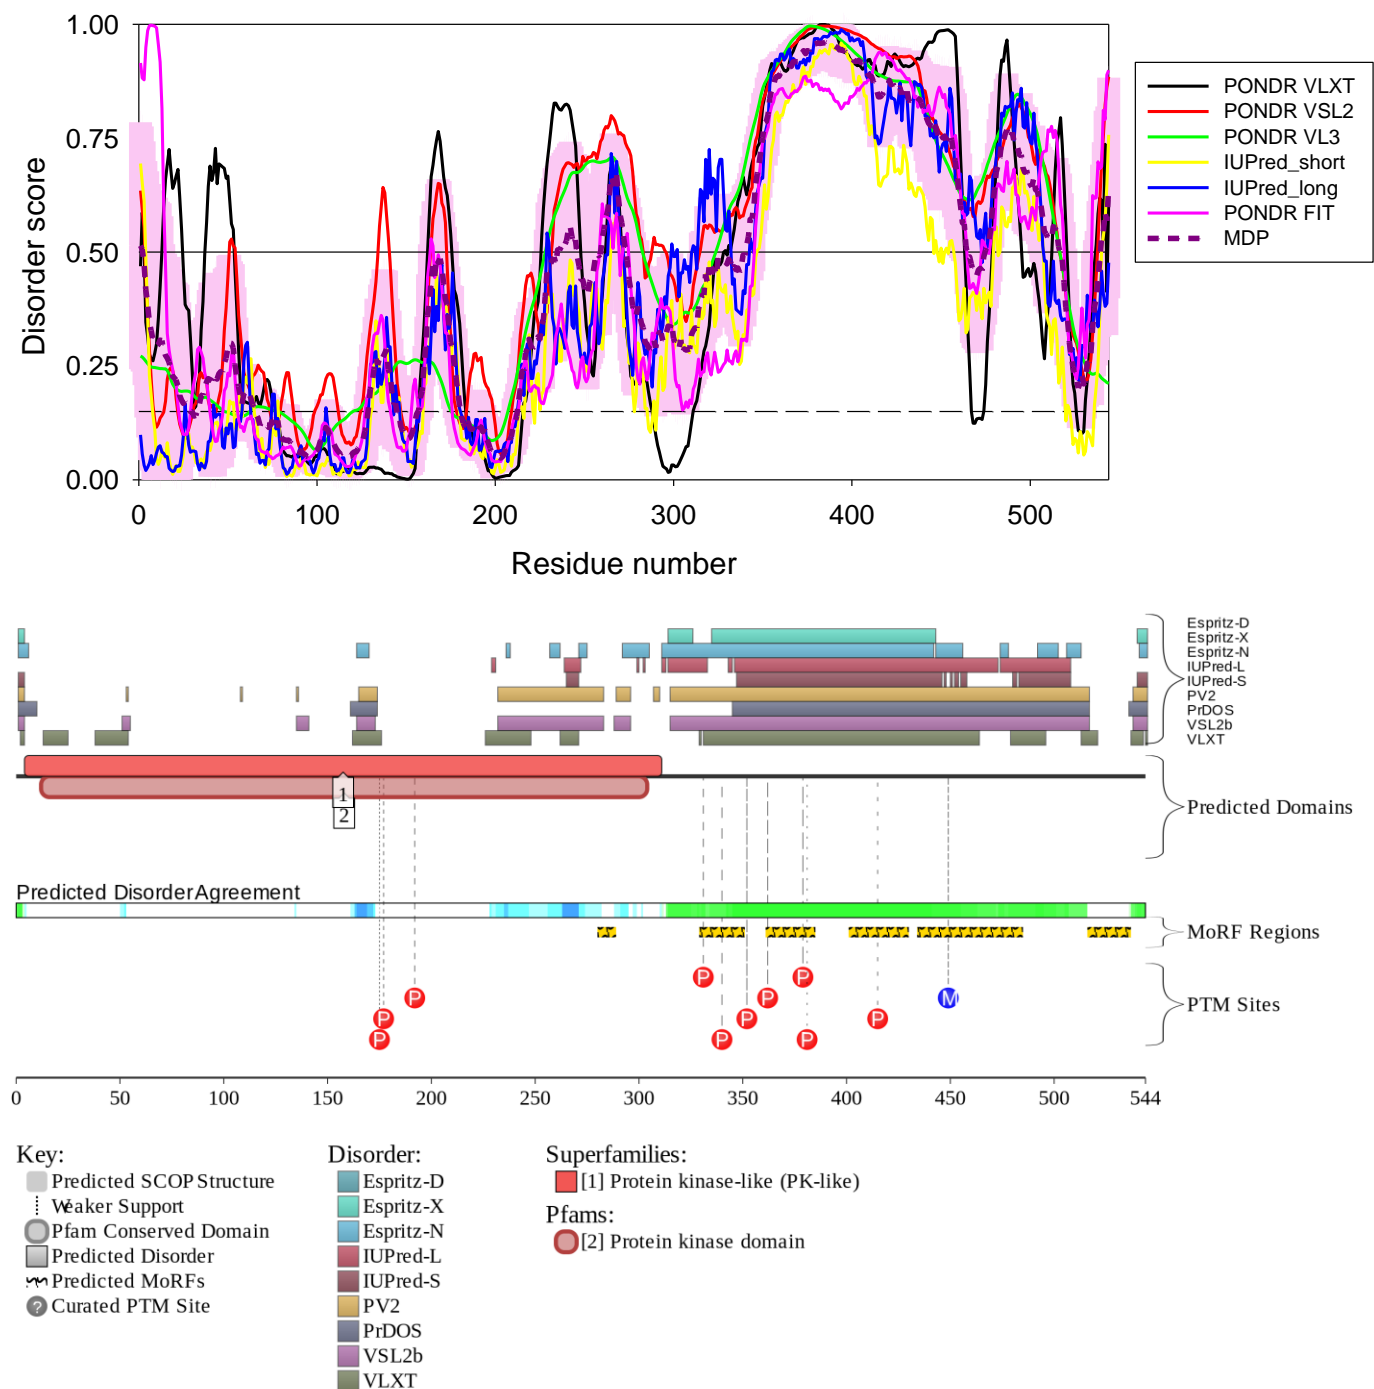



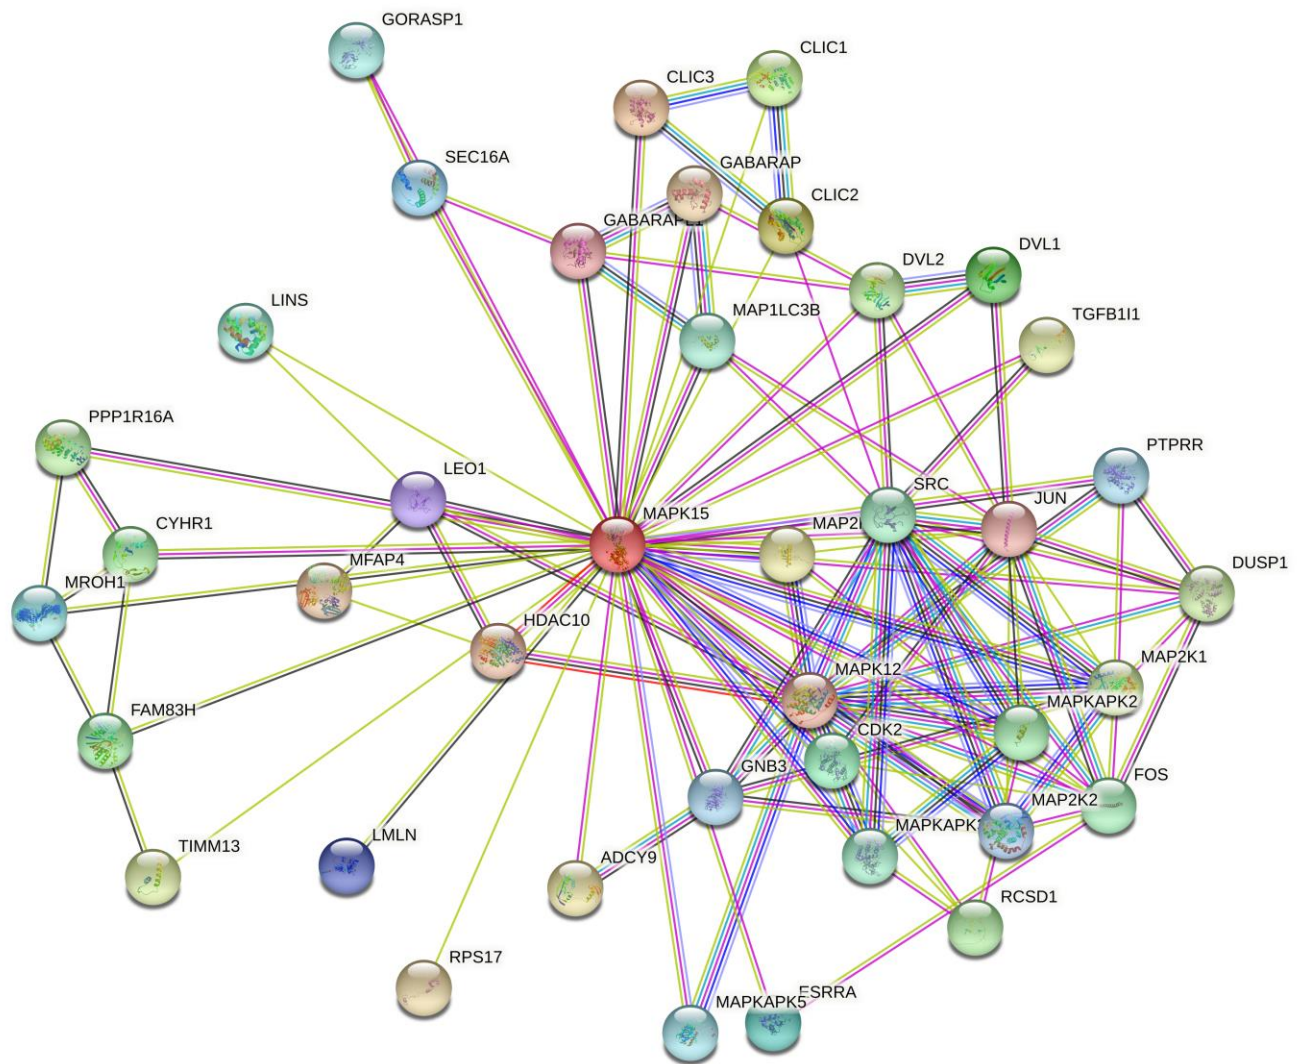

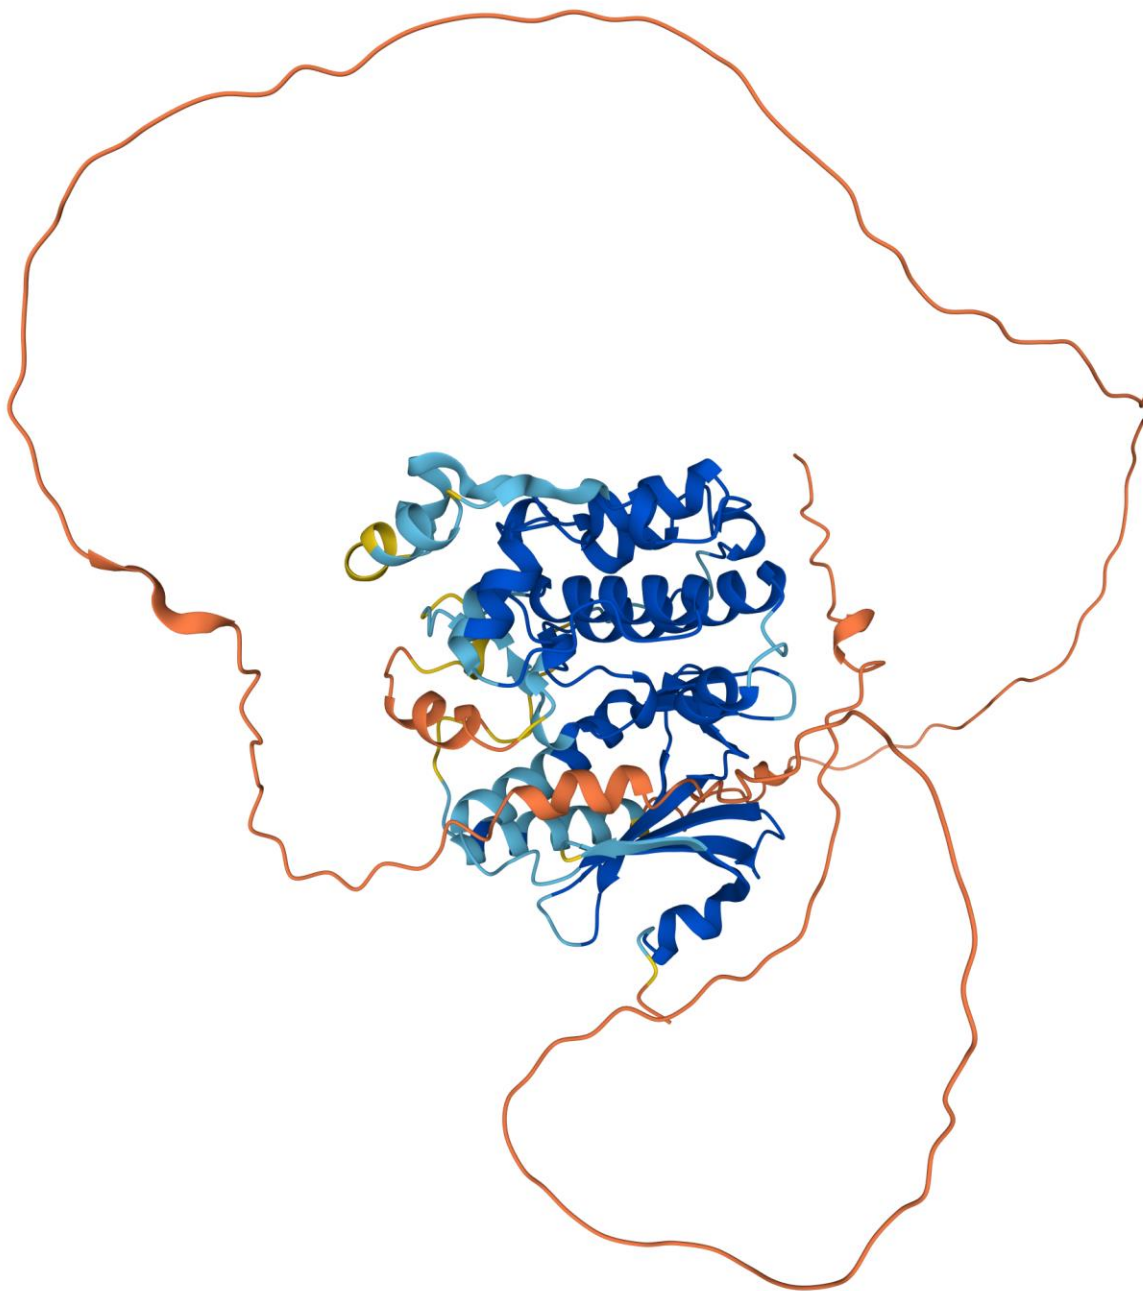

```
>sp|P05412|JUN_HUMAN Transcription factor Jun OS=Homo sapiens OX=9606 GN=JUN PE=1
SV=2
MTAKMETTFYDDALNASFLPSESGPYGYSNPKILKQSMTLNLADPVGSLKPHLRKNSDLLTSPDVGLLKLASPELERLIIQSSN
GHITTTPTPTQFLCPKNVTDEQEGFAEGFVRALAEHLHSQNTLPSVTSAAQPVNGAGMVAPAVASVAGGSGSGGFSASLHSEPPVY
ANLSNFPNGALSSGGGAPSYGAAGLAFFPAQPPQQQQPPHHLPPQMPVQHPRLQALKEEPQTVPEMPGETPPLSPIDMESQERIK
ERKMRNRNRIAAASKCRKRKLERIARLEEKVKTLKAQNSELASTANMLREQVAQLKQKVMNHVNSGCQLMLTQQLQTF
```

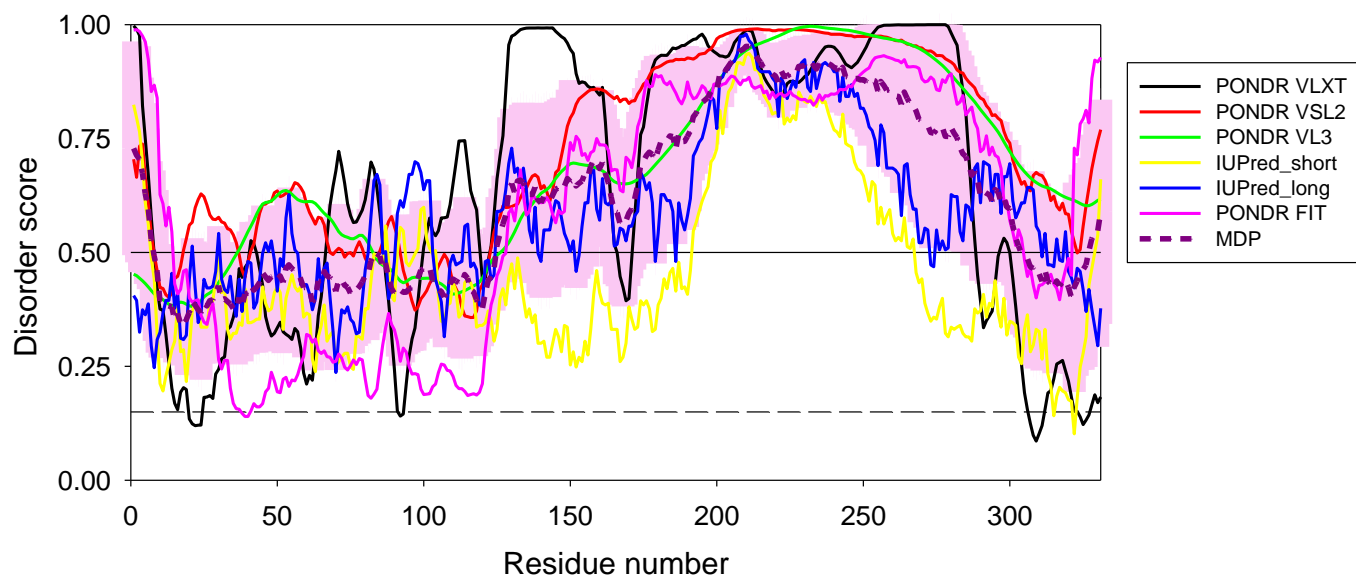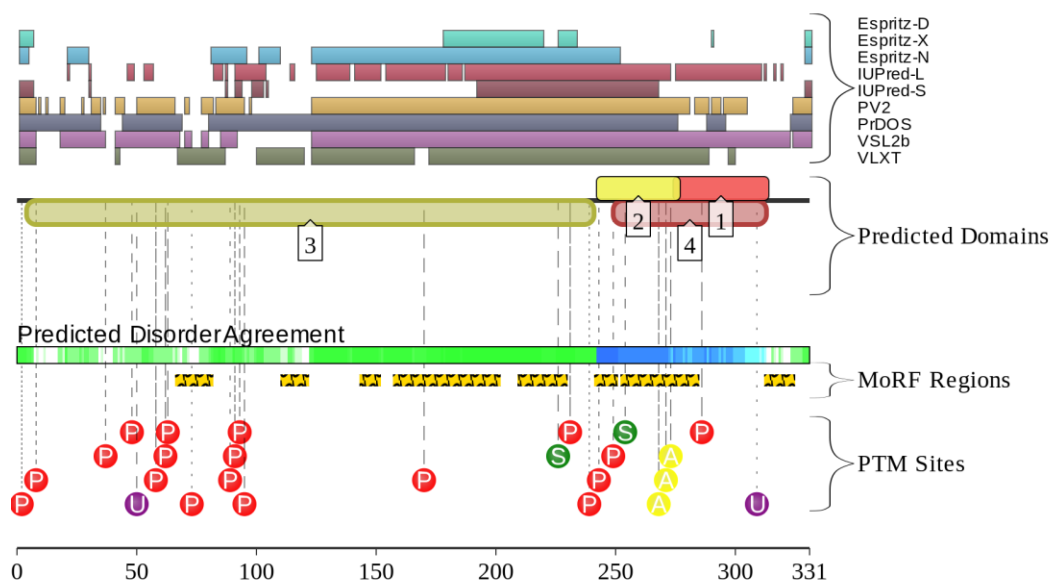

**Key:**

- Predicted SCOP Structure
- Weaker Support
- Pfam Conserved Domain
- Predicted Disorder
- Predicted MoRFs
- Curated PTM Site

**Disorder:**

- Espritz-D
- Espritz-X
- Espritz-N
- IUPred-L
- IUPred-S
- PV2
- PrDOS
- VSL2b
- VLXT

**Superfamilies:**

- [1] Leucine zipper domain
- [2] ADNA-binding domain in eukaryotic transcription factors

**Pfams:**

- [3] PF03957.8 (Family)
- [4] bZIP transcription factor





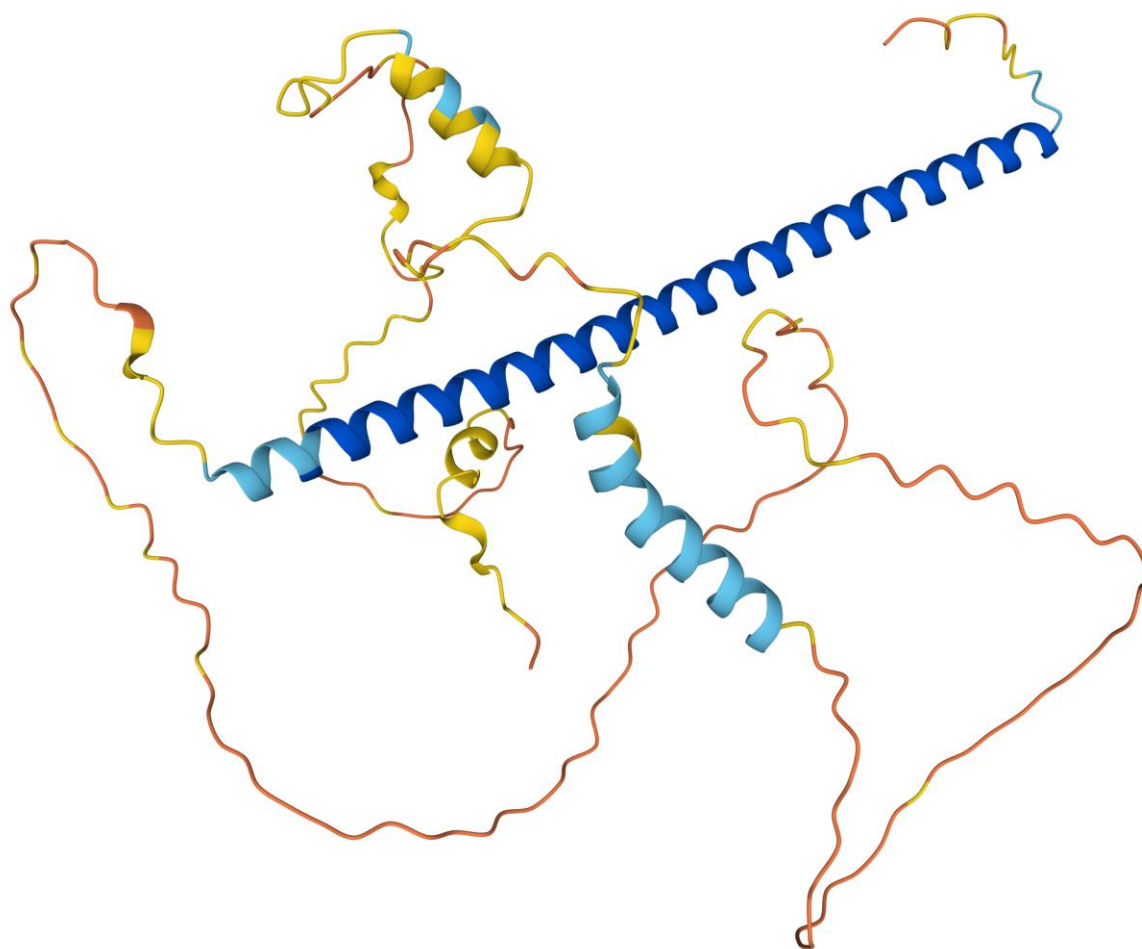

```
>sp|P01100|FOS_HUMAN Protein c-Fos OS=Homo sapiens OX=9606 GN=FOS PE=1 SV=1
MMFSGFNADYEASSSRCSSASPAGDSLSTYYHSPADSFSSMGSFVNAQDFCTDLAVSSANFIPTVTAISTSPDLQWLVPALVSSV
APSQTRAPHFPFGVPAPSAGAYSRAAGVVKMTGTGGAQSIGRRGKVEQLSPEEEEKRRIRRRERNKMAAAKCRNRRELTDTLQAETD
QLEDEKSALQTEIANLLKEKEKLEFILAAHRPACKIPDDLGFPEEMSVASLDLTGGLPEVATPESEEAFITPLLLNDPEPKPSVEP
VKSISSEMELKTEPFDDFLFPASSRPSGSETARSVPDMDLSGSFYAADWEPLHSGSLGMGPMALETELEPLCTFPVVTCTPSCCTAYTSS
FVFTYPEADSFPSCAAHRKGSSSNPESSDSLSSPTLLAL
```

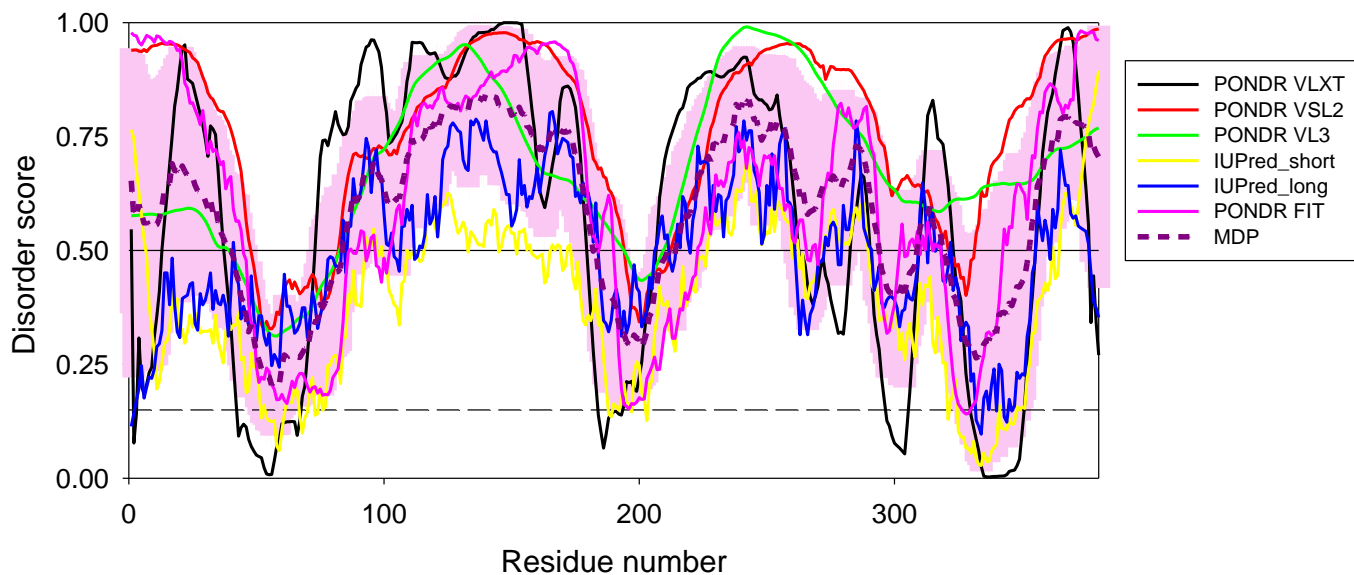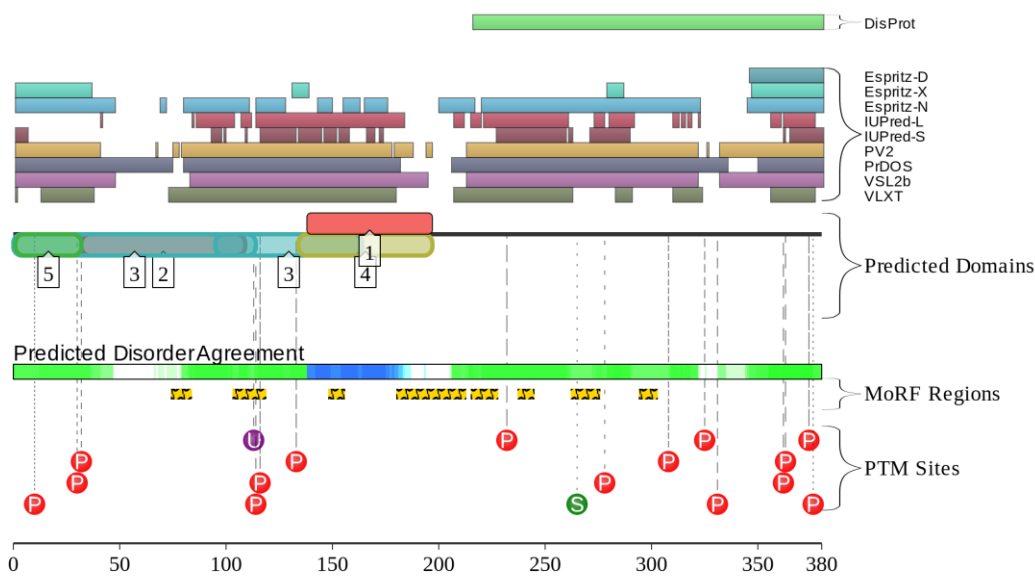

**Key:**

- Predicted SCOP Structure
- Weaker Support
- Pfam Conserved Domain
- Predicted Disorder
- Predicted MoRFs
- Curated PTM Site

**Disorder:**

- Espritz-D
- Espritz-X
- Espritz-N
- IUPred-L
- IUPred-S
- PV2
- PrDOS
- VSL2b
- VLXT

**Superfamilies:**

- [1] Leucine zipper domain

**Pfams:**

- [2] PB013236 (Pfam-B)
- [3] PB015196 (Pfam-B)
- [4] bZIP transcription factor
- [5] PB016094 (Pfam-B)



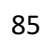

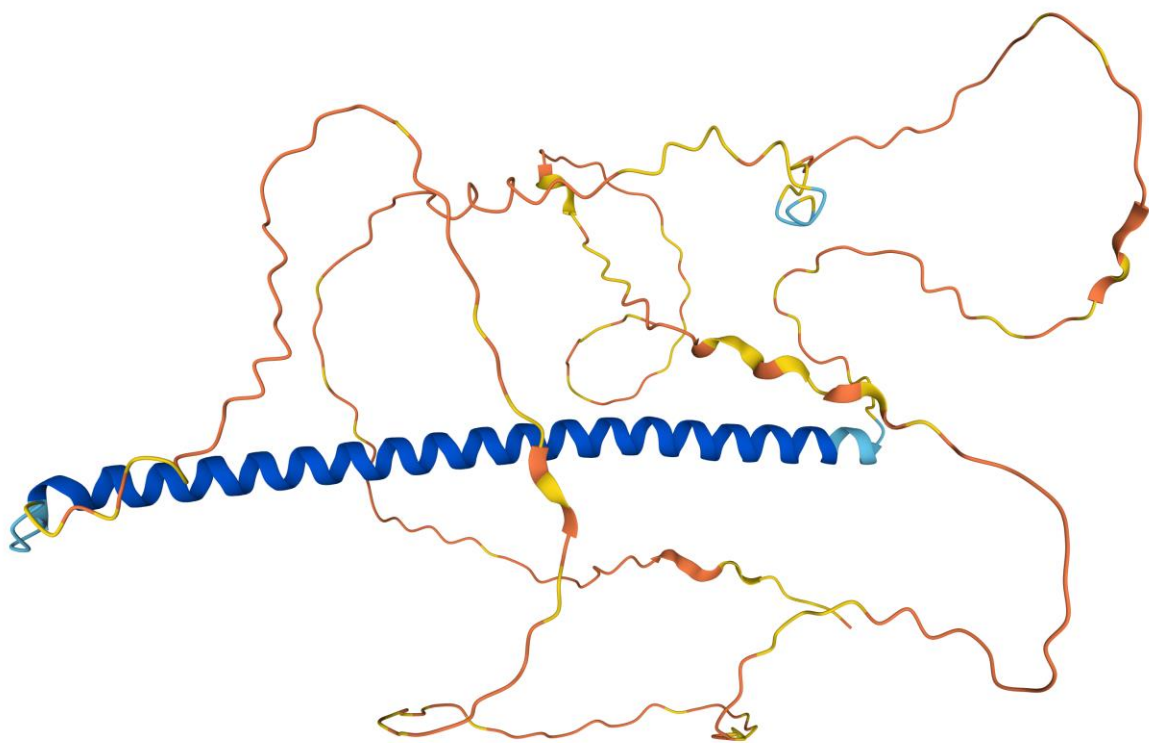

```

>sp|O15111|IKKA_HUMAN Inhibitor of nuclear factor kappa-B kinase subunit alpha
OS=Homo sapiens OX=9606 GN=CHUK PE=1 SV=2
MERPPGLRPGAGGPWEMRERLGTGGFGNVCLYQHRELDLKIAIKSCRLELSTKNRERWCHEIQIMKKLNHANVVKACDVPPEELNI
LIHDVPLLAMEYCSGGDLRKLNLNKPENCCGLKESQILSLSDIGSGIRYLHENKIIHRDLKPENIVLQDVGGKIIHKIIDLGYAK
DVDQGSCLTSFVGTLTQYLAPELFENKPYTATVDYWSFGTMVFECIAGYRPFLLHHLQPFTHWEKIKKKDKPCIFACEEMSGEVRF
SHLPQPNLCLSLVVEPMENWLQMLNWDPPQRRGGPVDLTCLKQPRCFVLMHDHILNLKIVHILNMTSAKIIISFLLPPDESLSLQSR
IERETGINTGSQELLSETGISLDPRKPASQCVDLDGVRGCDSYMVYLFDKSKTVYEGPFAFSRSLSDCVNYIVQDSKIQLPIIQLRK
VWAEAVHYVSGLKEDYSRLFQGGQRAAMLSLLRYNANLTKMKNTLISASQQLKAKLEFFHKSIIQLDLERYSEQMTYGISSEKMLKA
WKEMEKAIIHYAEVGVIGYLEDQIMSLHAEIMELQKSPYGRQGDLMESLEQRAIDLKYLKLRPSDHSYSDSTEMVKIIVHTVQ
SQDRVLKELFGHLSKLLGCKQKIIDLLPKVEVALSNIKEADNTVMFMQGRQKEIWHLLKIACTQSSARSLVGSLEGAVTPQTS
AWLPPTSAEHDHSLSCVVTPQDGETSAQMIEENLNLCLGHLSTIIHEANEEQGNSMMLNDWSWLTE

```

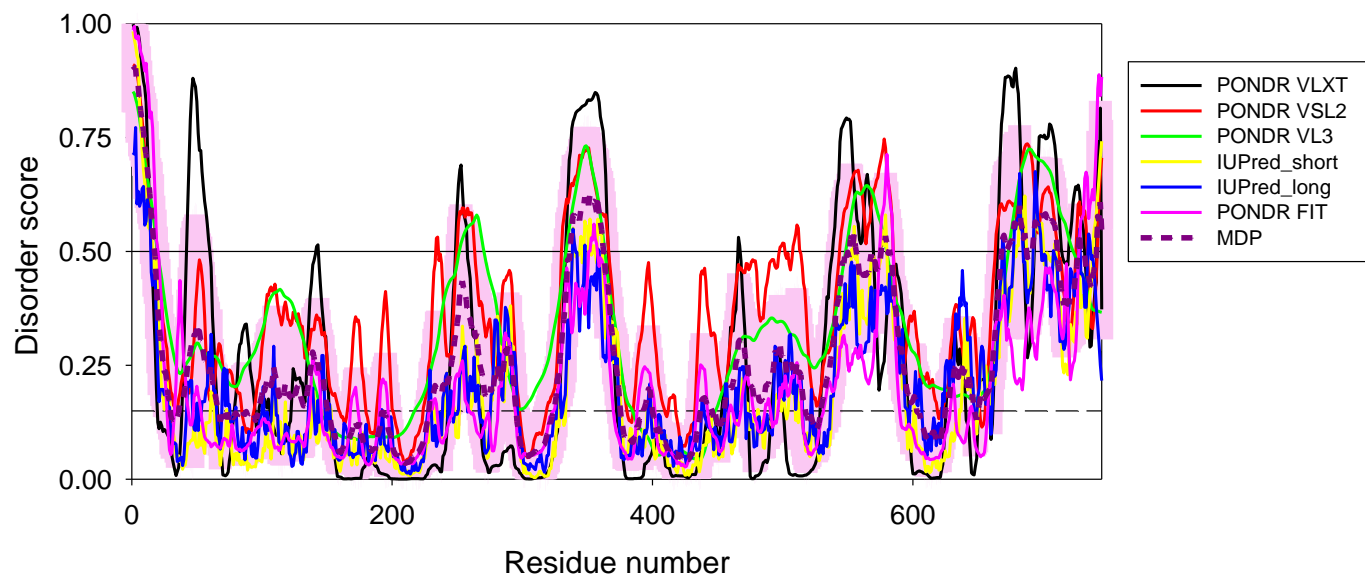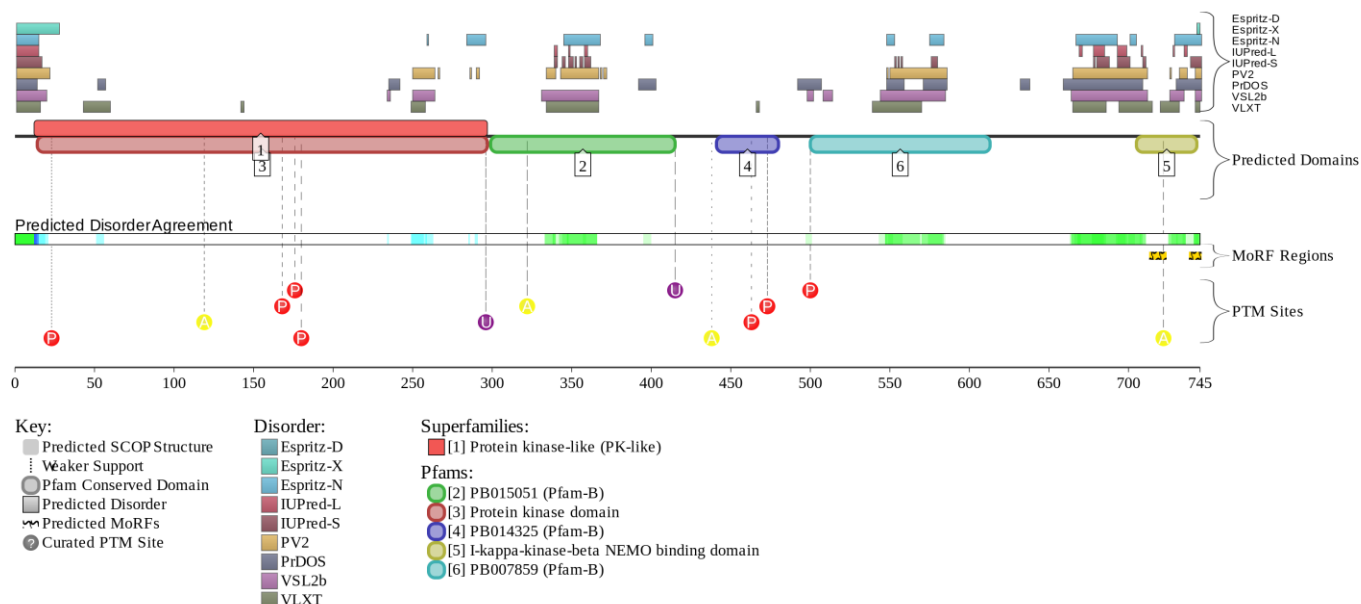



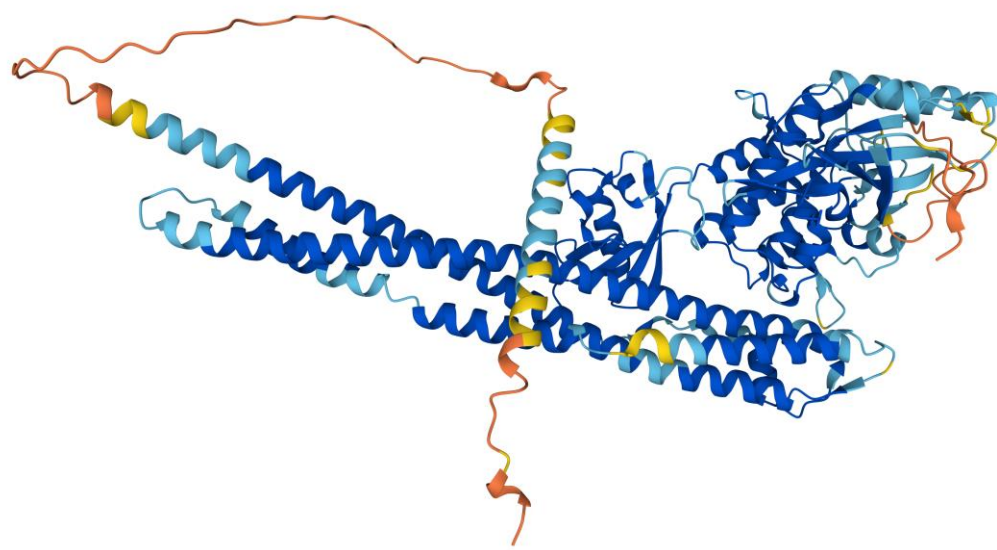

```

>sp|O14920|IKKB_HUMAN Inhibitor of nuclear factor kappa-B kinase subunit beta OS=Homo
sapiens OX=9606 GN=IKKB PE=1 SV=1
MSWSPSLTTQTCGAWEMKERLGTGGFGNVIRWHNQETGEQIAIKQCRQELSPRNRERWCLEIQIMRRLTHPNVVAARDVPEGMQN
LAPNDLPLAMEYCQGGDLRKYLNQFENCCGLREGAILTLLSDIASALRYLHENRIIHRDLKPENIVLQQGEQRLIHKIIDLGYA
KELDQGSLCTSFVGTQLQYLAPELLEQQKYTVTVDYWSFGTLAFECITGFRPFLPNWQPVQVHWSKVRQKSEVDIVVSEDLNGTVKF
SSSLPYPNLNSVLAERLEKWLQLMLMWHPRQRGTDPTYGPNCGCFKALDDIILNLKLVHILNMVTGTIHTYPTVEDESLQSLKARI
QQDTGIPEEDQELLQEAGLALIPDKPATQCISDGKLNIGHTLDMDLVFLFDNSKITIYETQISPRQPESVSCILQEPKRNLAFFQ
LRKVWGQVWHSIQTLKEDCNRLQQGQRAAMNLLRNNSCLSKMKNSMASMSQQLKAKLDFFKTSIQIDLEKYSEQTEFGITSDKL
LLAWREMEQAVELCGRENEVKLLVERMMALQTDIVDLQRSMPGRKQGGTLDDLEEQARELYRRLREKPRDQRTEGDSQEMVRLLL
QAIQSFEKKVRVIYITQLSKTVVCKQKALELLPKVEEVVSLMNEDEKTVVRLQEKRQKELWNLLKIACSKVRGPVSGSPDSMNASR
LSQPGQLMSQPSTASNSLPEPAKKSEELVAEAHNLCITLLENAIQDQTVREQDQSFTALDWSWLQTEEEHSCLEQAS

```

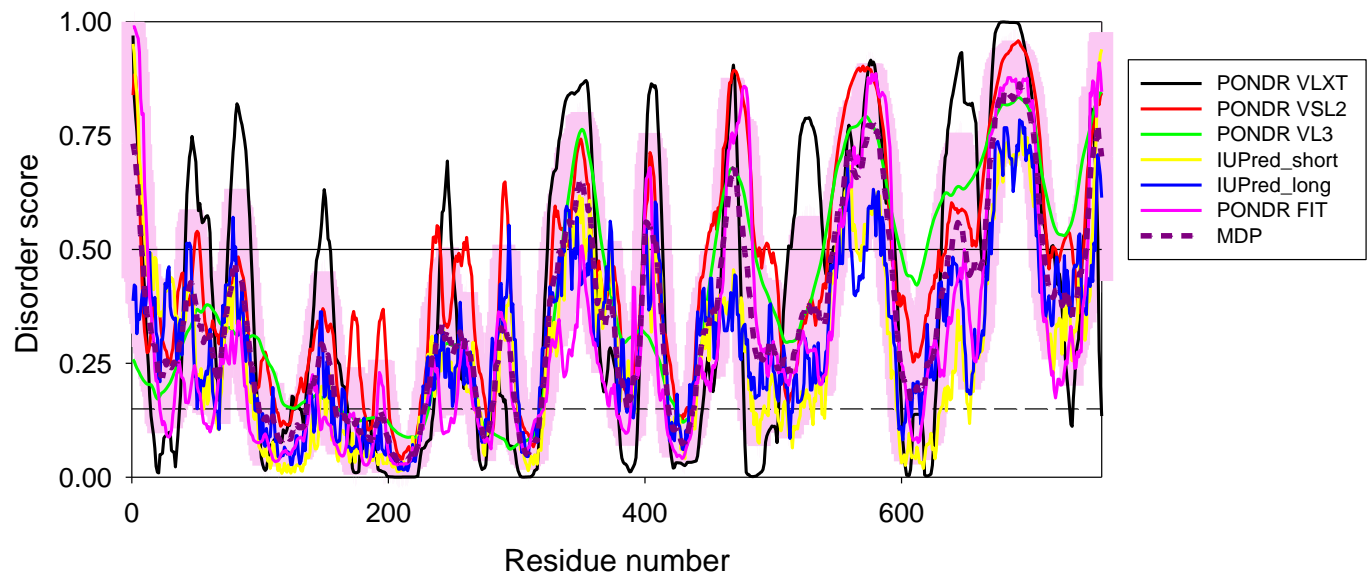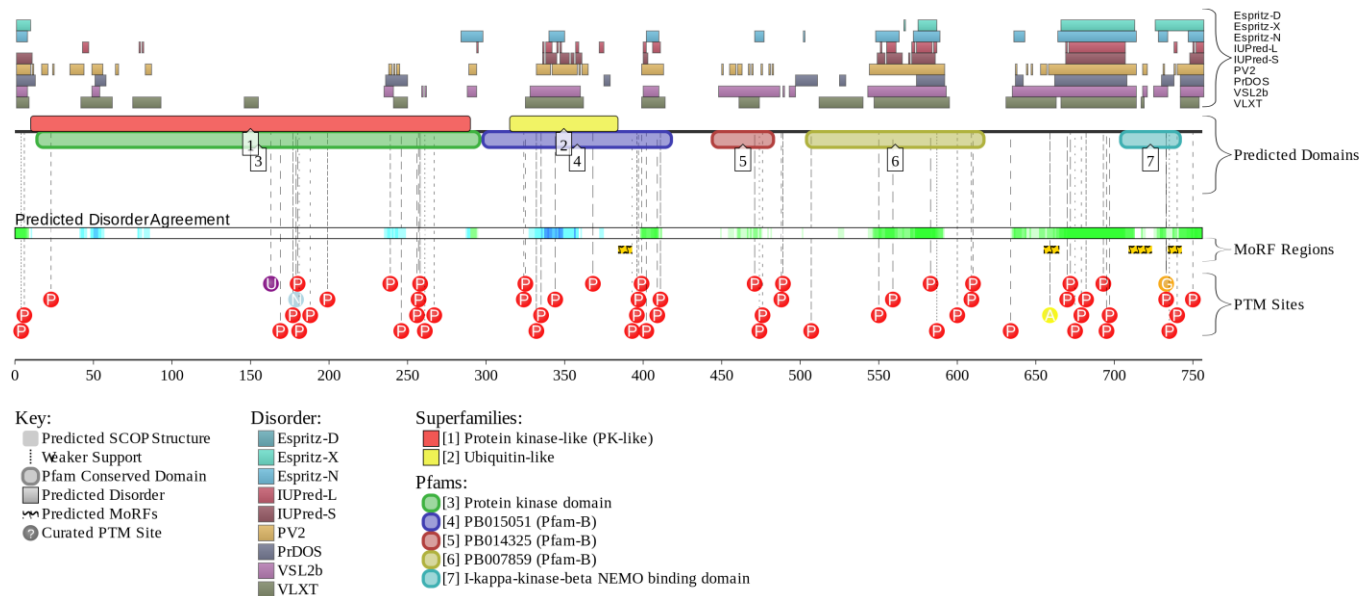



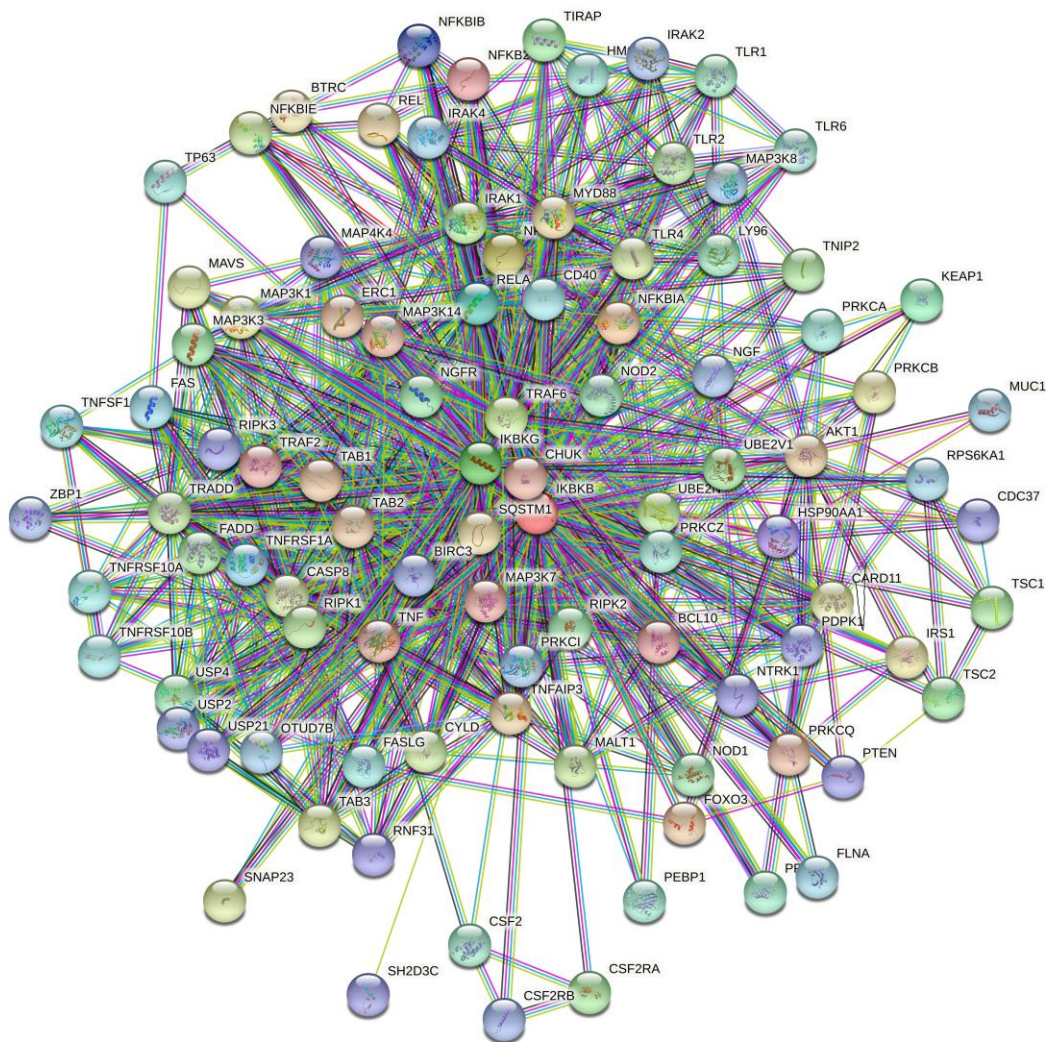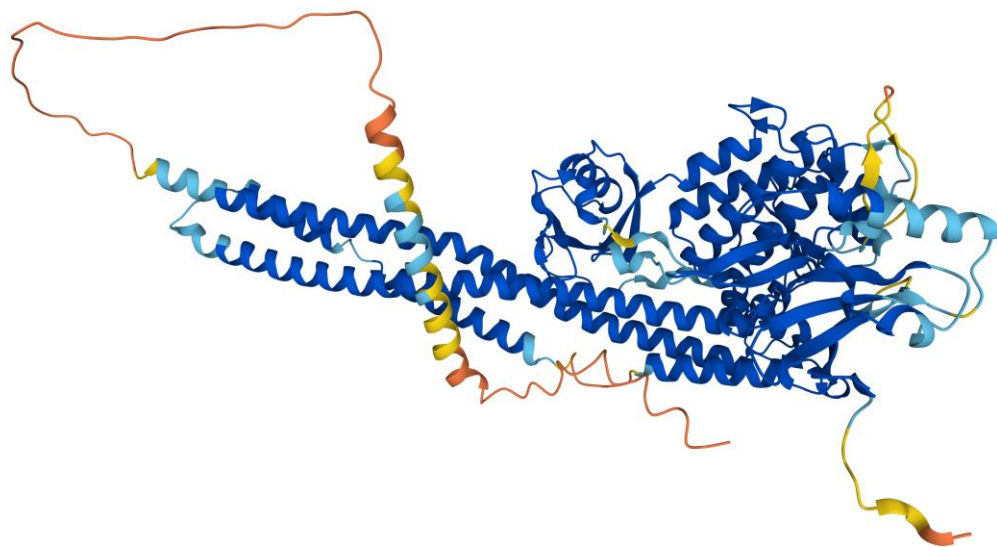



```
>sp|Q9Y6K9|NEMO_HUMAN NF-kappa-B essential modulator OS=Homo sapiens OX=9606 GN=IKBK
PE=1 SV=2
MNRHLWKSQLCMVQPSGGPAADQDVLGEESPLGKPAMLHLPSEQGAPETLQRCLEENQELRDAIRQSNQILRERCEELLHFQAS
QREEKEFLMCKFQEARKLVERLGLLEKLDLKRQKEQALREVEHLKRCQQQMAEDKASVKAQVTSLLGELQESQSRLEAATKECQAL
EGRARAASEQARQLESEREALQQQHSVQVDQLRMGGQSVEAALRMRQAASEEKRLAQQLQVAYHQLFQEYDNHIKSSVVGSEK
RGMQLEDLQQLQQAEEALVAKQEVIDKLKEEAQHKIVMETVPVLKAQADIYKADFQAERQAREKLAIEKKELLQEQLQQLQREY
SKLKASCQESARIEDMRKRHVEVSQAPLPPAPAYLSSPLALPSQRRSPPEEPPDFCCPKCQYQAPDMDTLQIHVMECIE
```

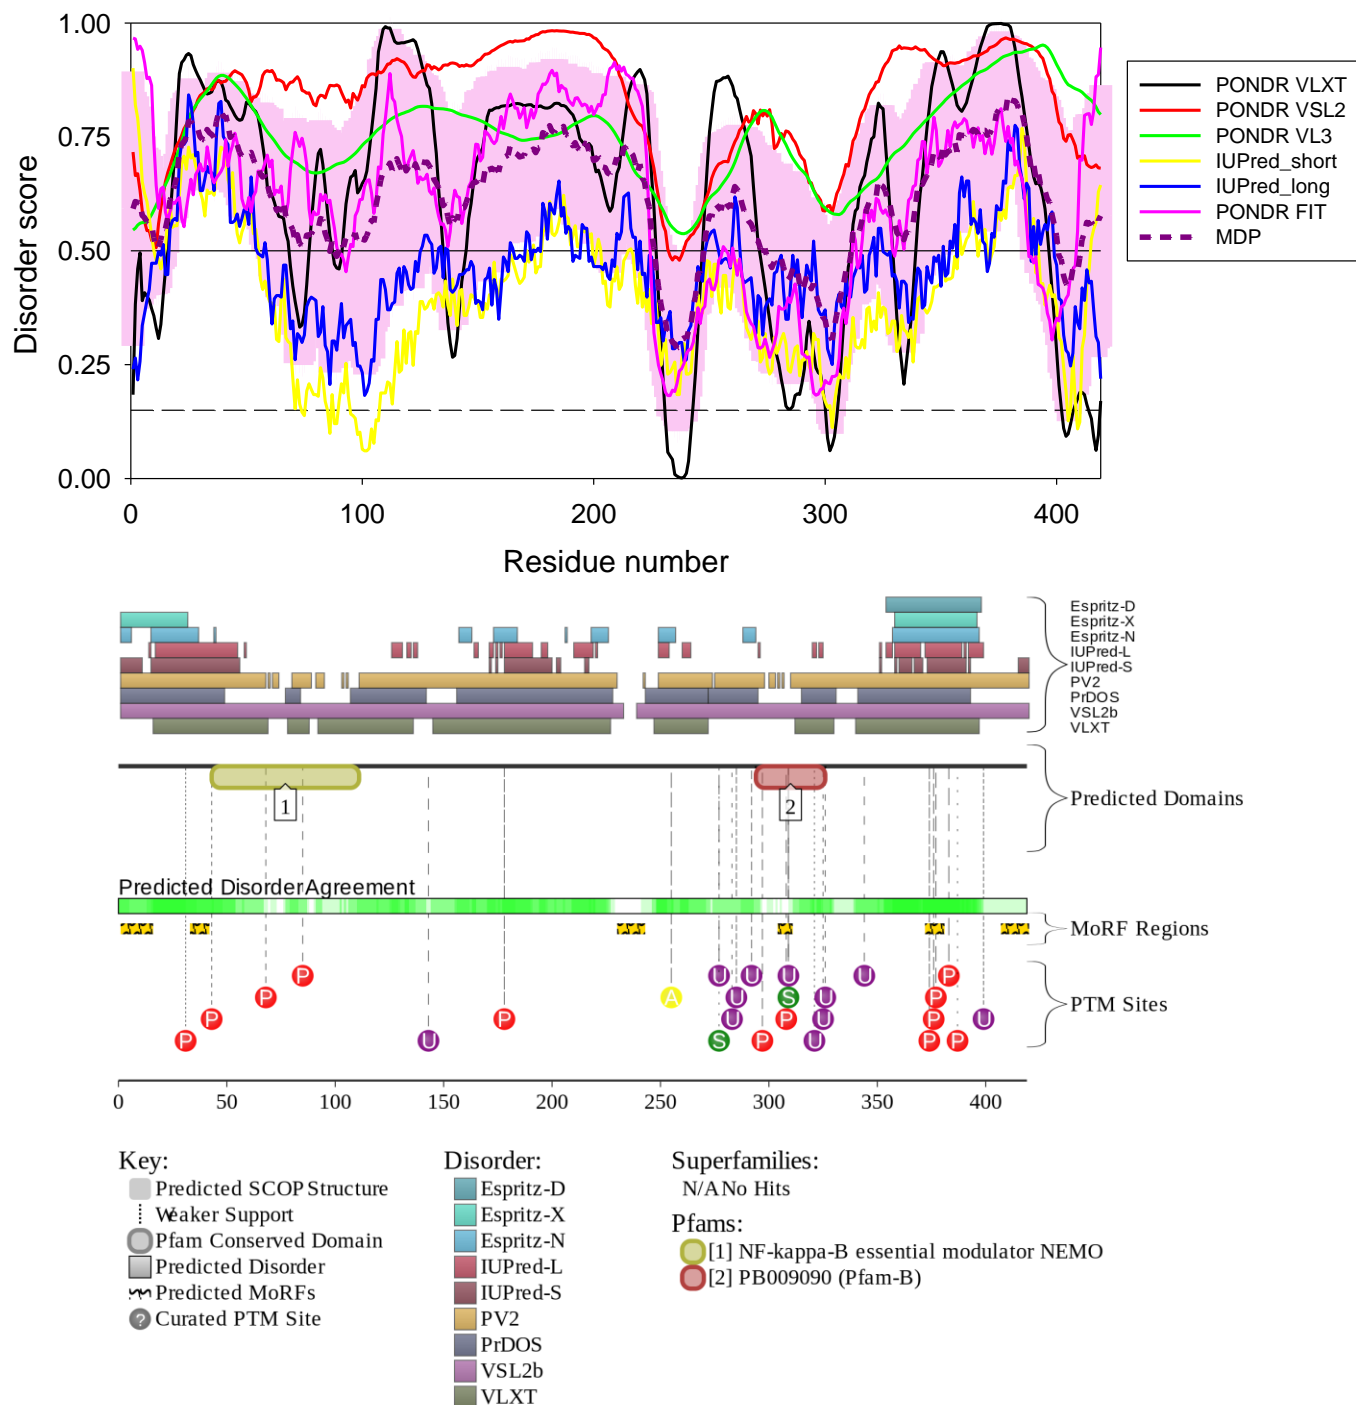

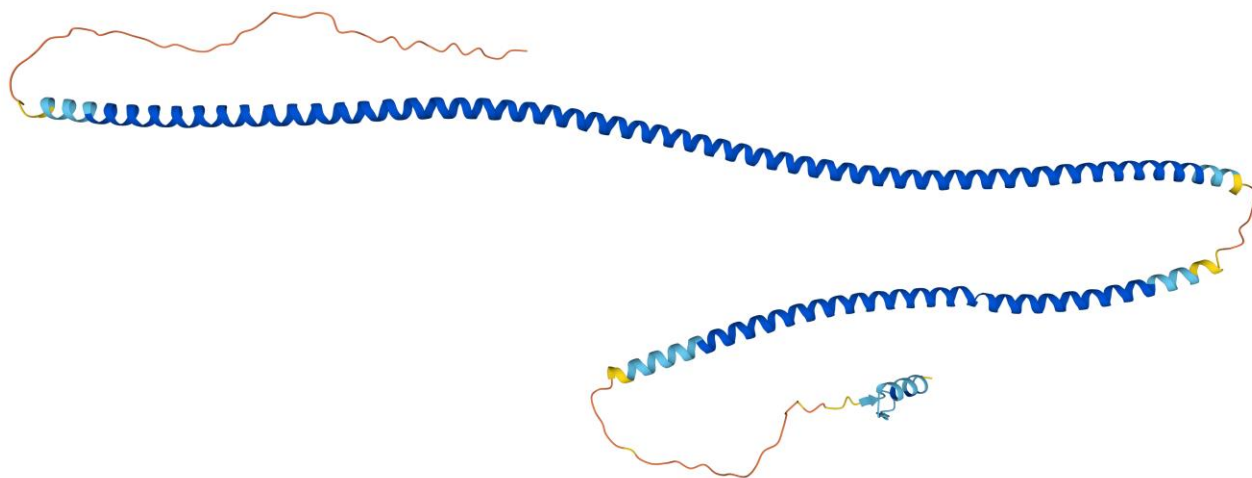

```

>sp|Q14164|IKKE_HUMAN Inhibitor of nuclear factor kappa-B kinase subunit epsilon
OS=Homo sapiens OX=9606 GN=IKBKE PE=1 SV=1
MQSTANYLWHTDDLGGQATASVYKARNKKSSELVAVKVFNTTSYLRPREVQVREFEVLRKLNHQNIVKLFAVEETGGSRQKVLV
MEYCSSGSLLSVLESPENAFGLPEDEFLVVLRCVVAGMNLRENGIVHRDIKPGNIMRLVGEEGQSIYKLTDFGAARELDDDEKF
VSVYGTTEEYLHPDMYERAVLRKPQQKAFGVTVDLWSIGVTLYHAATGSLPFIPIFGGPRRNKEIMYRITTEKPAGAIAGAQRRENG
PLEWYSYTLPTICQLSLGLQSQLVPILANILEVEQAKCWGFDQFFAETSDILQRVVHVFSLSQAVLHHIYIHAHNTIAIFQEAVH
KQTSVAPRHQEYLFEGHLCVLEPSVSAQHIAHTTASSPLTLFSTAIPKGLAFRDPALDVPKFVPKVDLQADYNTAKGVLGAGYQA
LRLARALLDGOELMFRGLHWVMEVLQATCRRTLEVARTSLLYLSSSLGTERFSSVAGTPEIQELKAAAEELRSRLRTLAEVL SRC S
QNITETQESLSSLNRELVKSRDQVHEDRSIQQIQCCLDKMNFIYKQFKKSRMRPGLGYNEEQIHKLDKVNFSHLAKRLLQVVFQEE
CVQKYQASLVTHGKRMRVVHETRNHLRLVGCSVAACNTEAQGVQESLSKLLLEELSHQLLQDRAKGAQASPPPIAPYPSPTRKDLL
LHMQELCEGMKLLASDLLDNNRIIERLNRVPAPPDV

```

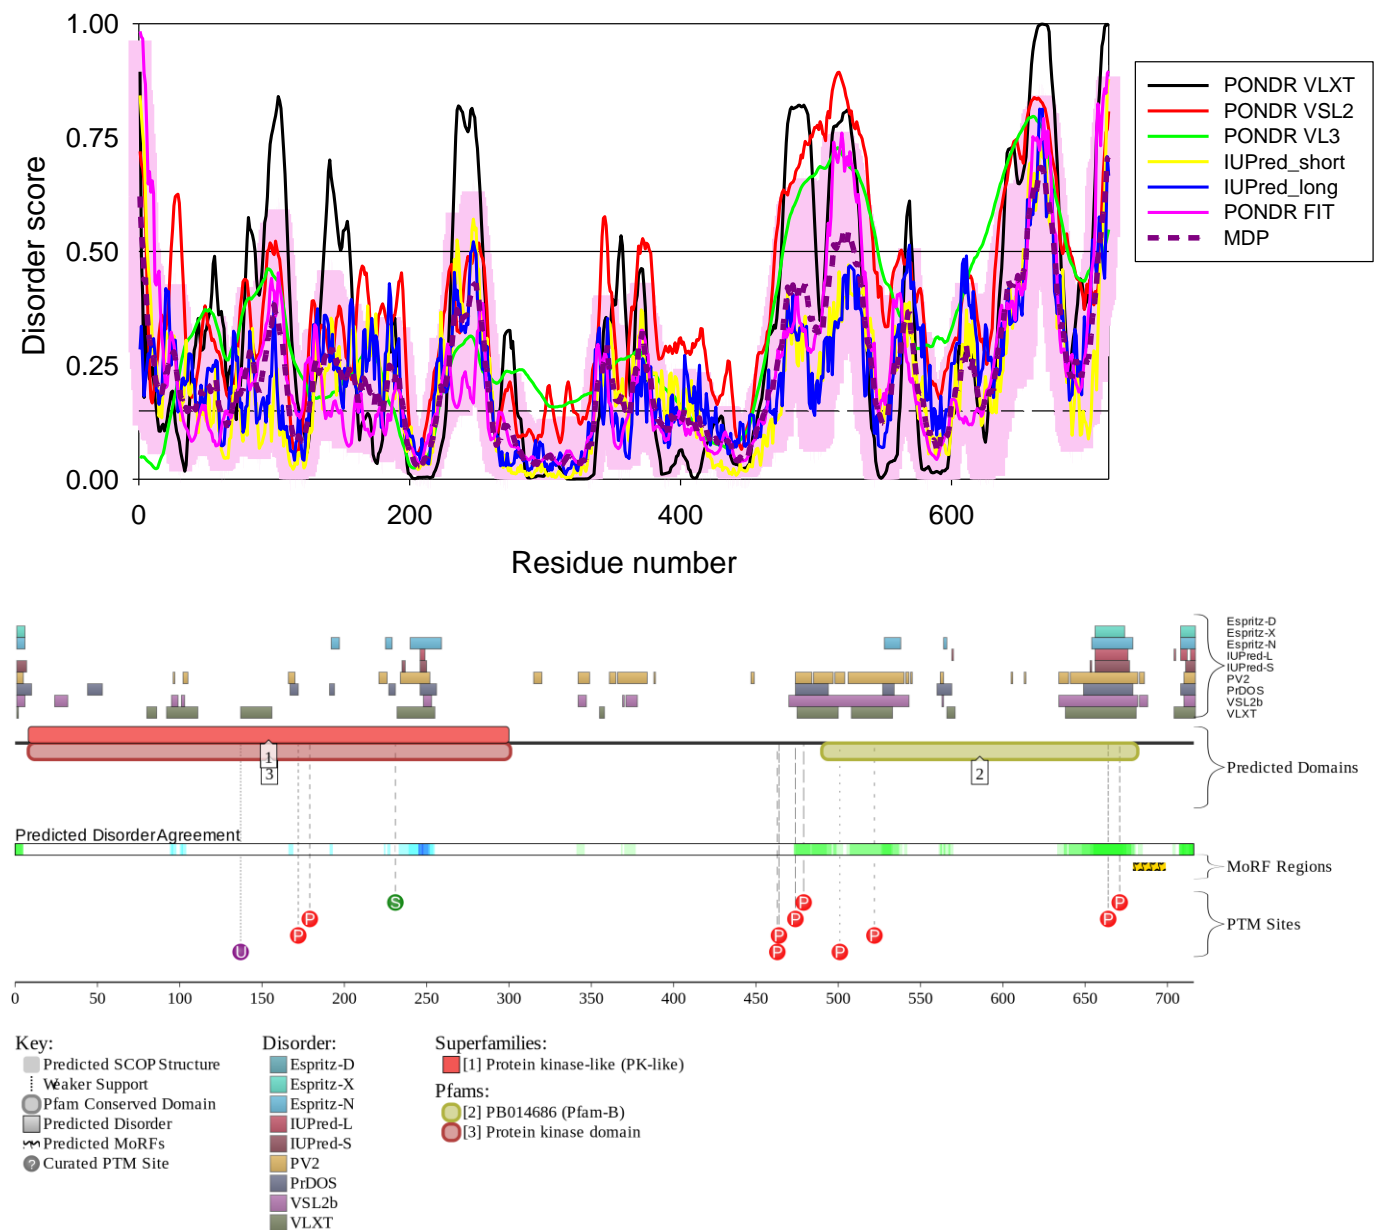



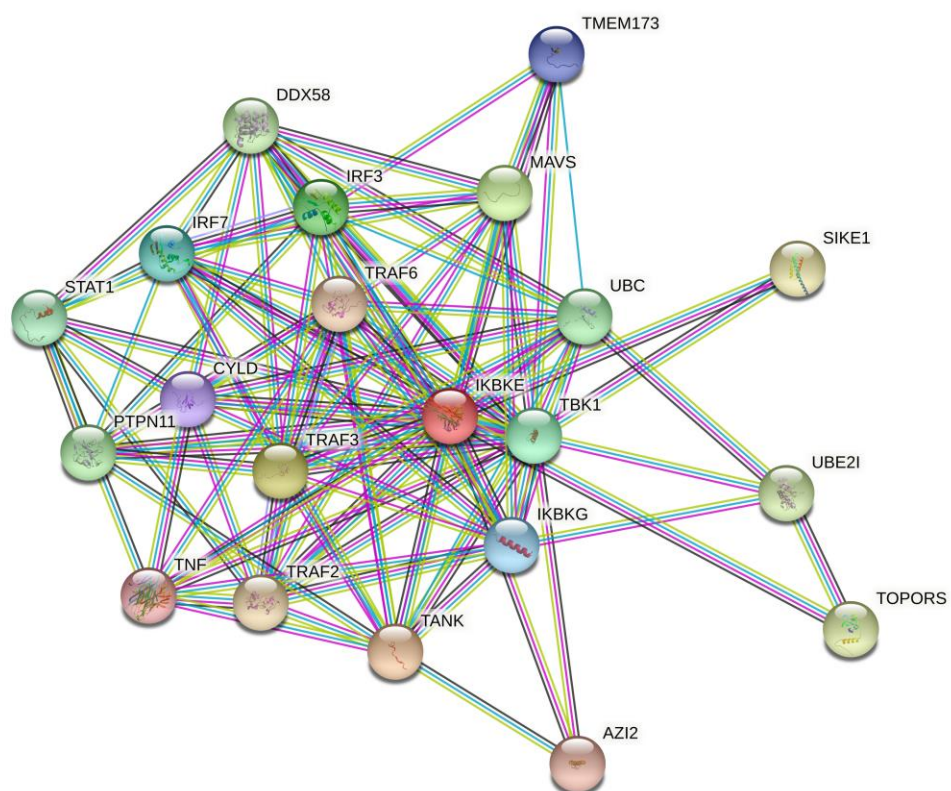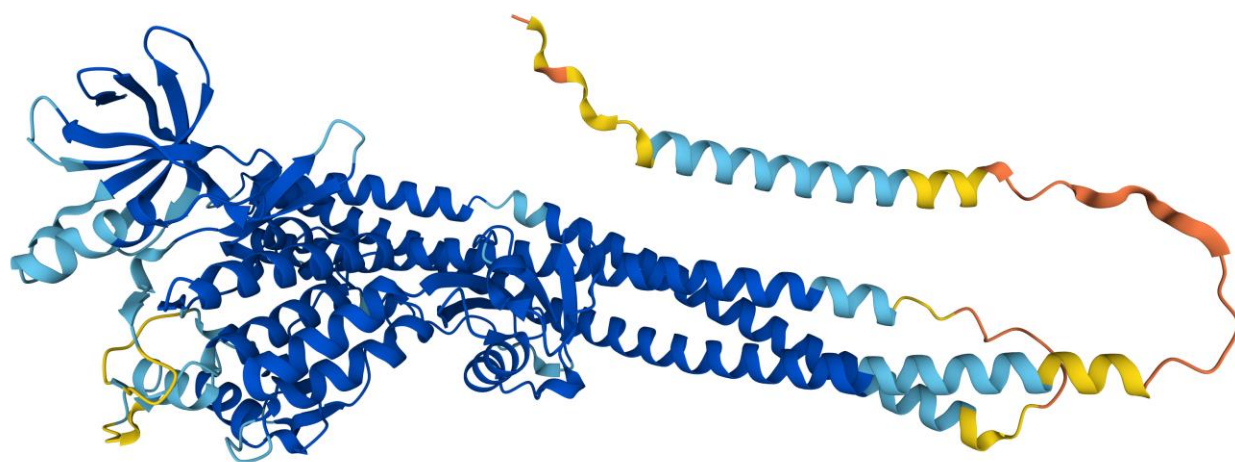

```
>sp|P25963|IKBA_HUMAN NF-kappa-B inhibitor alpha OS=Homo sapiens OX=9606 GN=NFKBIA
PE=1 SV=1
MFQAAERPQEWAMEGPRDGLKKERLLDDRHSGLDSMKDEEYEQMVKELQEIRLEPQEVPRGSEPWKQQLTEDGDSFLHLAI IHE
EKALTMEVIRQVKGDIAFLNFQNNLQQTPLHLAVITNQPEIAEALLGAGCDPELRDFRGNTPLHLACEQGCLASVGLTQSCTTP
HLHSILKATNYNGHTCLHLASIHGYLGIVELLVSLGADVNAQEPNCNGRTALHLAVDLQNPDLVSLLLKCGADVNRVTYQGYSPYQ
LTWGRPSTRIQQQLGQLTLENLQMLPESEDEESYDTESEFTEFTEDELDPYDDCVFGGQRLTL
```

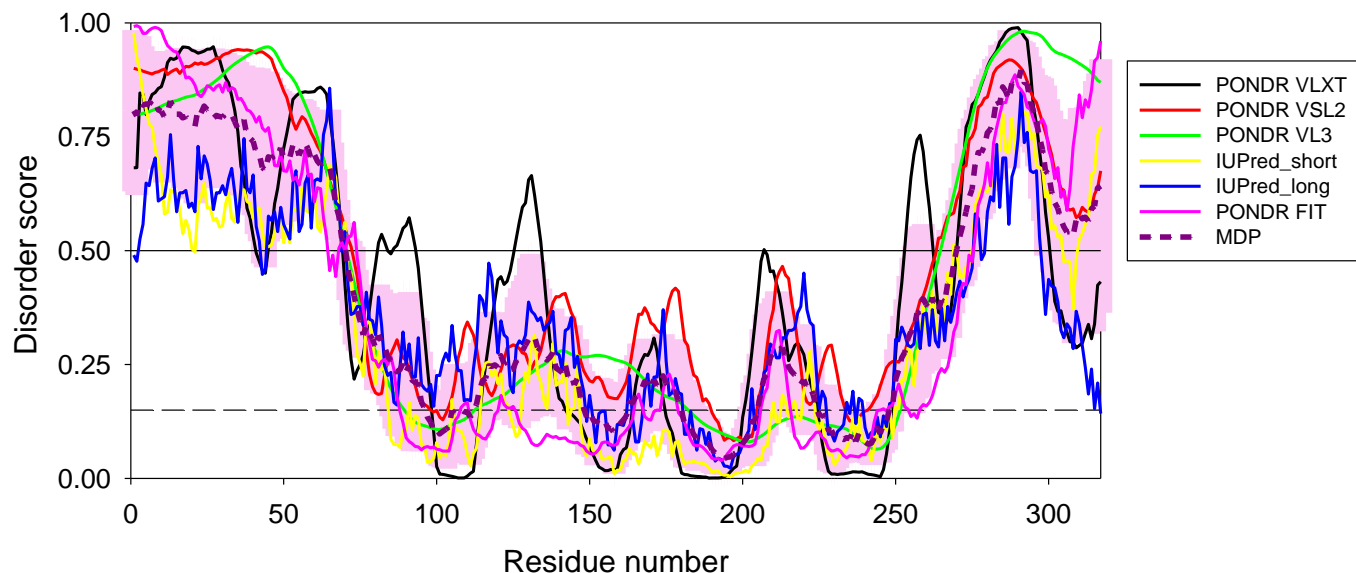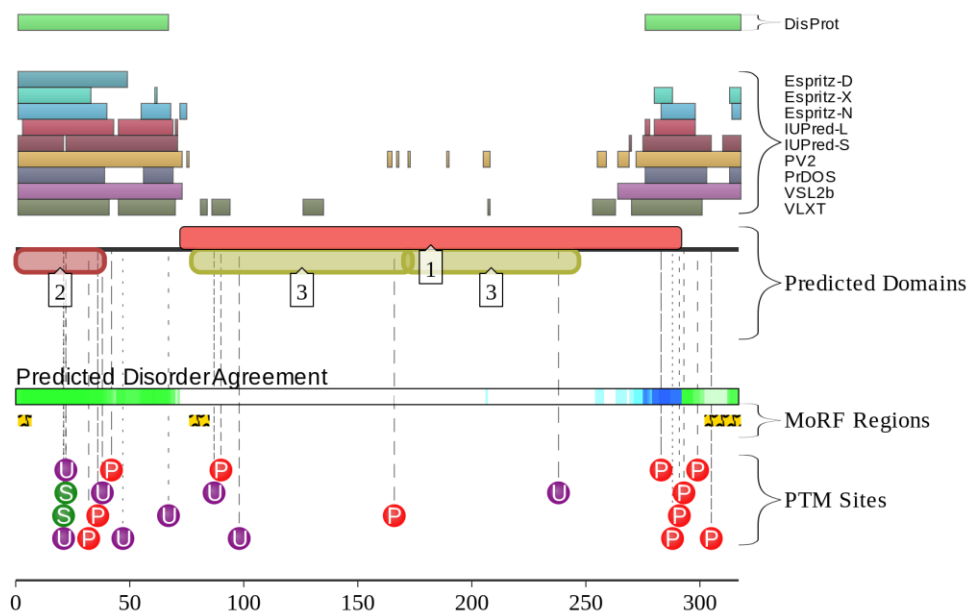

Key:

- Predicted SCOP Structure
- Weaker Support
- Pfam Conserved Domain
- Predicted Disorder
- Predicted MoRFs
- Curated PTM Site

Disorder:

- Espritz-D
- Espritz-X
- Espritz-N
- IUPred-L
- IUPred-S
- PV2
- PrDOS
- VSL2b
- VLXT

Superfamilies:

- [1]Ankyrin repeat

Pfams:

- [2] PB016960 (Pfam-B)
- [3]Ankyrin repeats (3 copies)

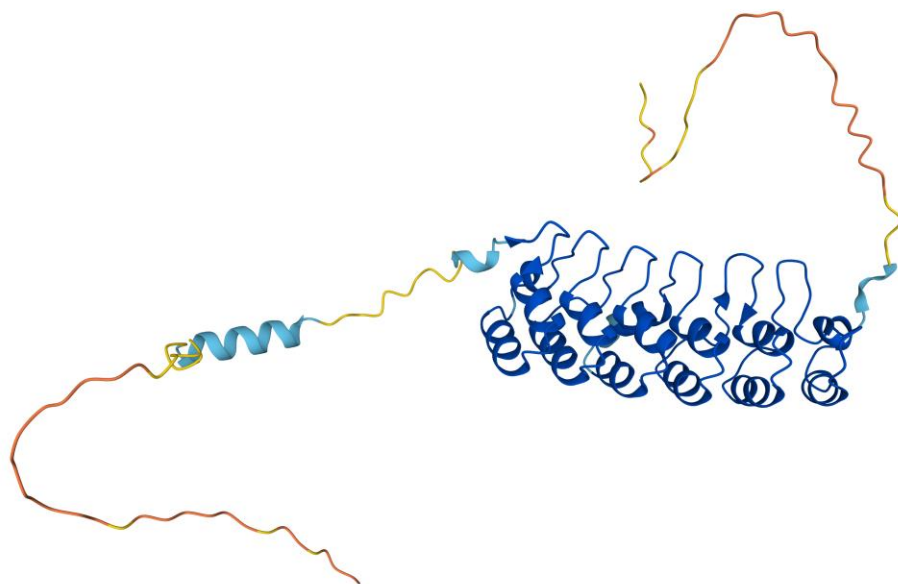



```
>sp|Q04206|TF65_HUMAN Transcription factor p65 OS=Homo sapiens OX=9606 GN=RELA PE=1
SV=2
MDELFLIFPAEPAQASGPYVEIIEQPKQRGMRFRYKCEGRSAGSIPGERSTDTTKTHPTIKINGYTGP GTVRISLVTKDP PPHRP
HPHELVGKDCRDGFEAEELCPDRCIHSFQNLGIQCCKRDLEQAISQRIQTNNNPFQVPIEEQRGDYDLNAVRLCFQVTVRDP SG
RPLRLPPVLSHPIFDNRAPNTAELKICRVNRNSGSLGGDEIFLLCDKVQKEDI EYFTGPGWEARGSFSSQADVHRQVAIVFRT P
PYADPSLQAPVRVSMQLRRPSDRELSEPMFQYLPD TDDRHRIEEKRKRTYETFKSIMKKS PFSGPTDPRPPPRRIAVPSRSSAS
VPKPAPQPYPF TSSSLSTINYDEFPTMVFP SGQISQASALAPAPPQVLPQAPAPAPAPAMVSALAQA PAPVPVLAPGPPQAVAPPA
PKPTQAGEGTLSEALLQLQFDD ELDGALLGNSTDPAVF TDLASVDNSEFQQLLNQGI PVAPHTTEPMLMEYPEAITRLVTGAQRP
PDPAPAPL GAPGLPNGLLSGDEDFSSIADMDFSALLSQISS
```

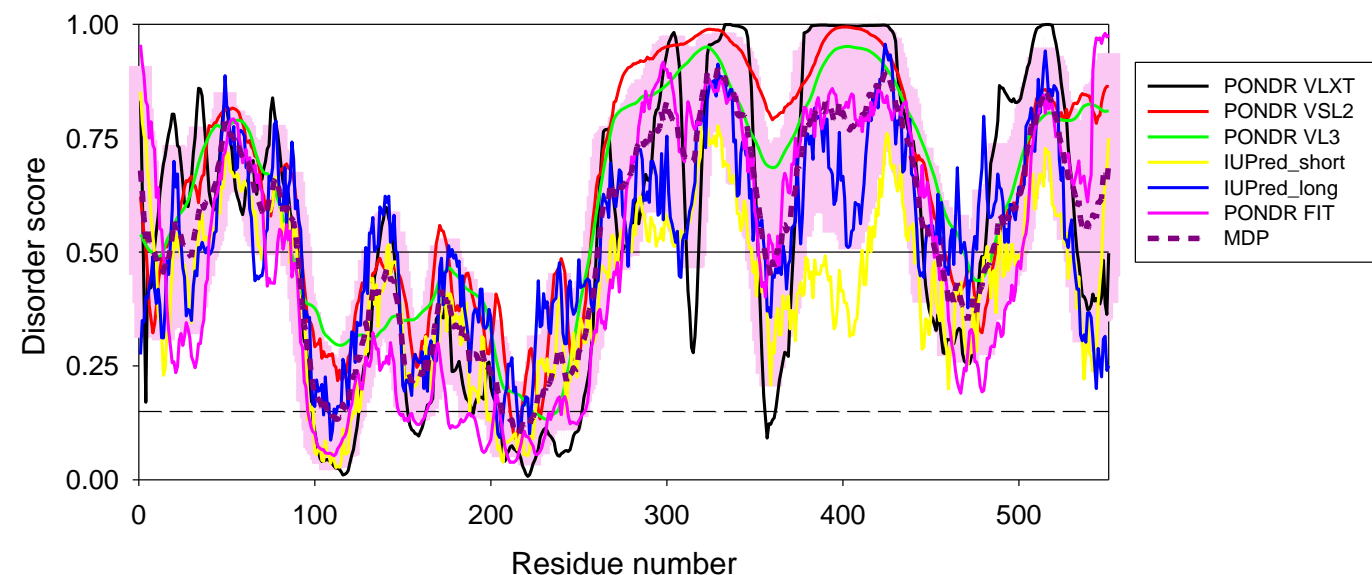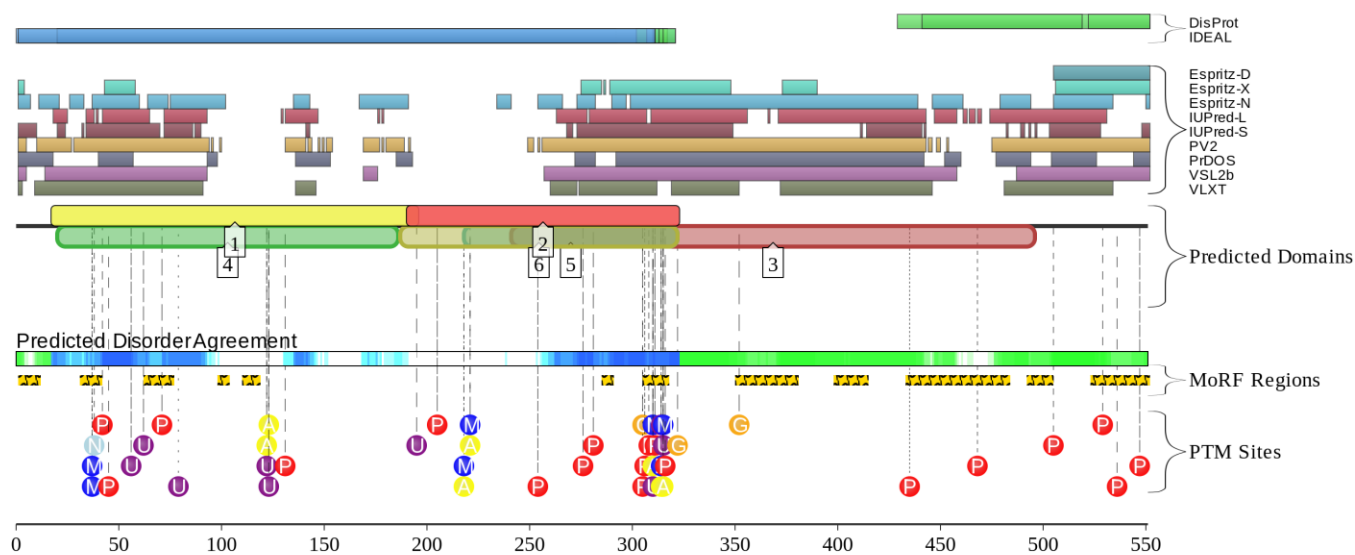

**Key:**

- Predicted SCOP Structure
- Waker Support
- Pfam Conserved Domain
- Predicted Disorder
- Predicted MoRFs
- Curated PTM Site

**Disorder:**

- Espritz-D
- Espritz-X
- Espritz-N
- IUPred-L
- IUPred-S
- PV2
- PrDOS
- VSL2b
- VLXT

**Superfamilies:**

- [1] p53-like transcription factors
- [2] E set domains

**Pfams:**

- [3] PB018191 (Pfam-B)
- [4] Rel homology domain (RHD)
- [5] PB012675 (Pfam-B)
- [6] PB003008 (Pfam-B)

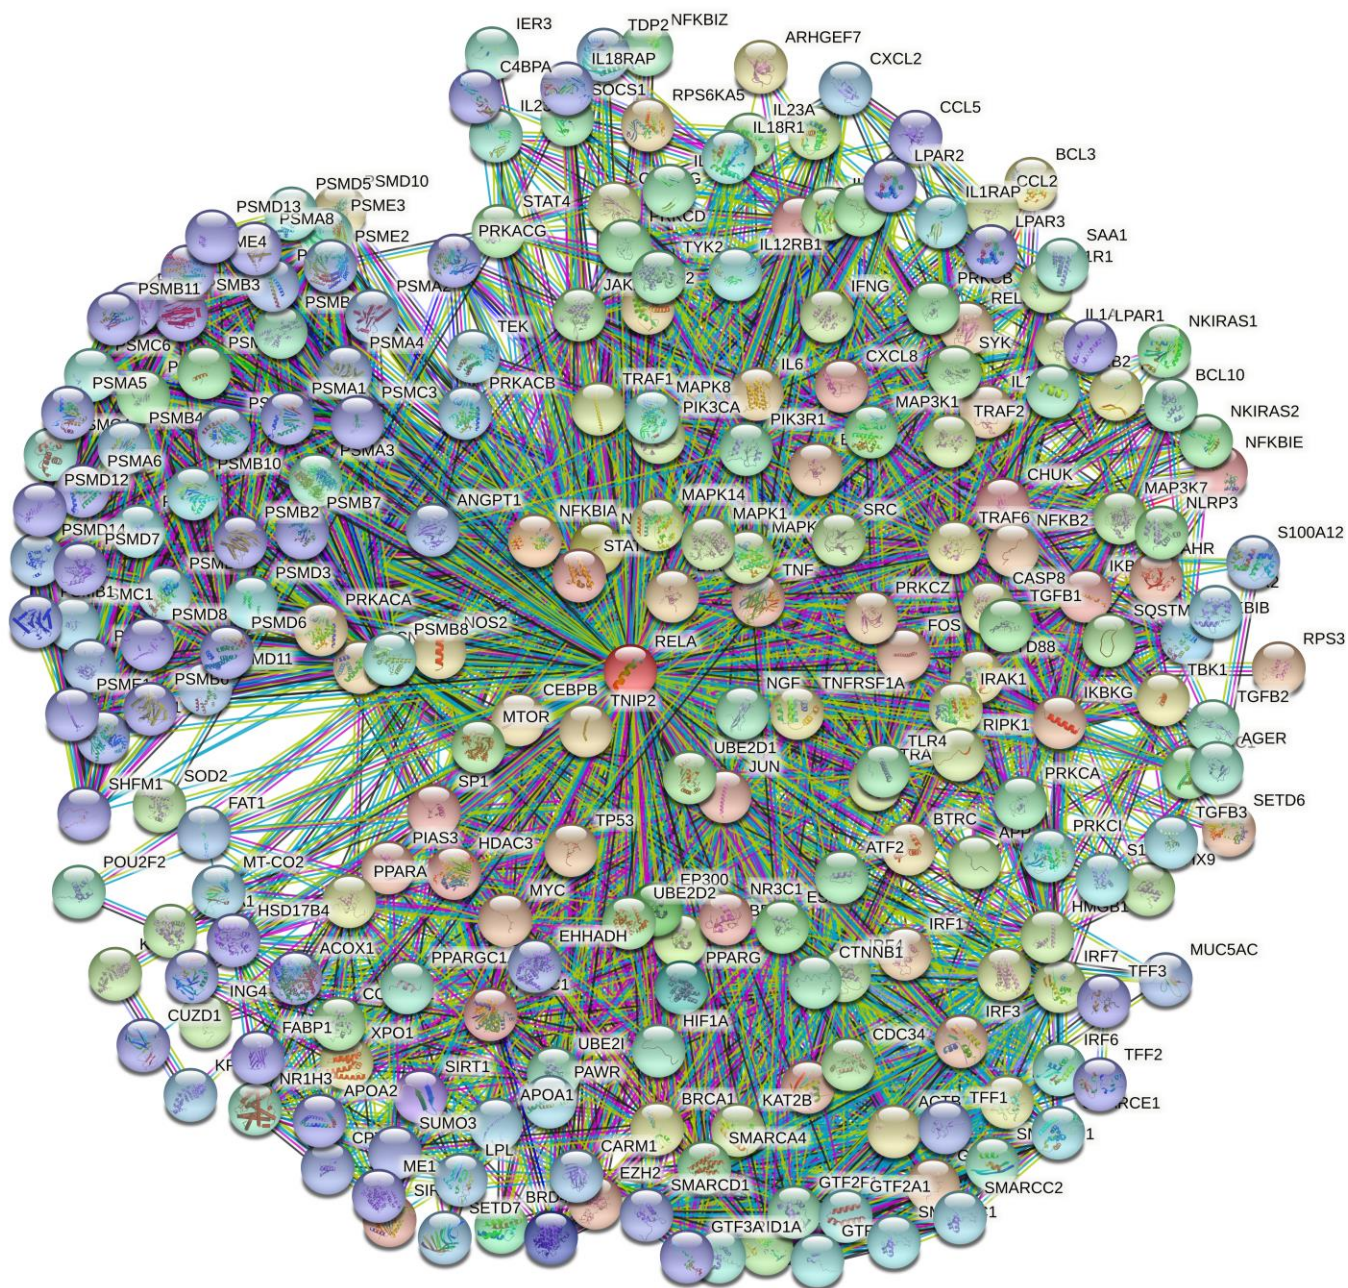

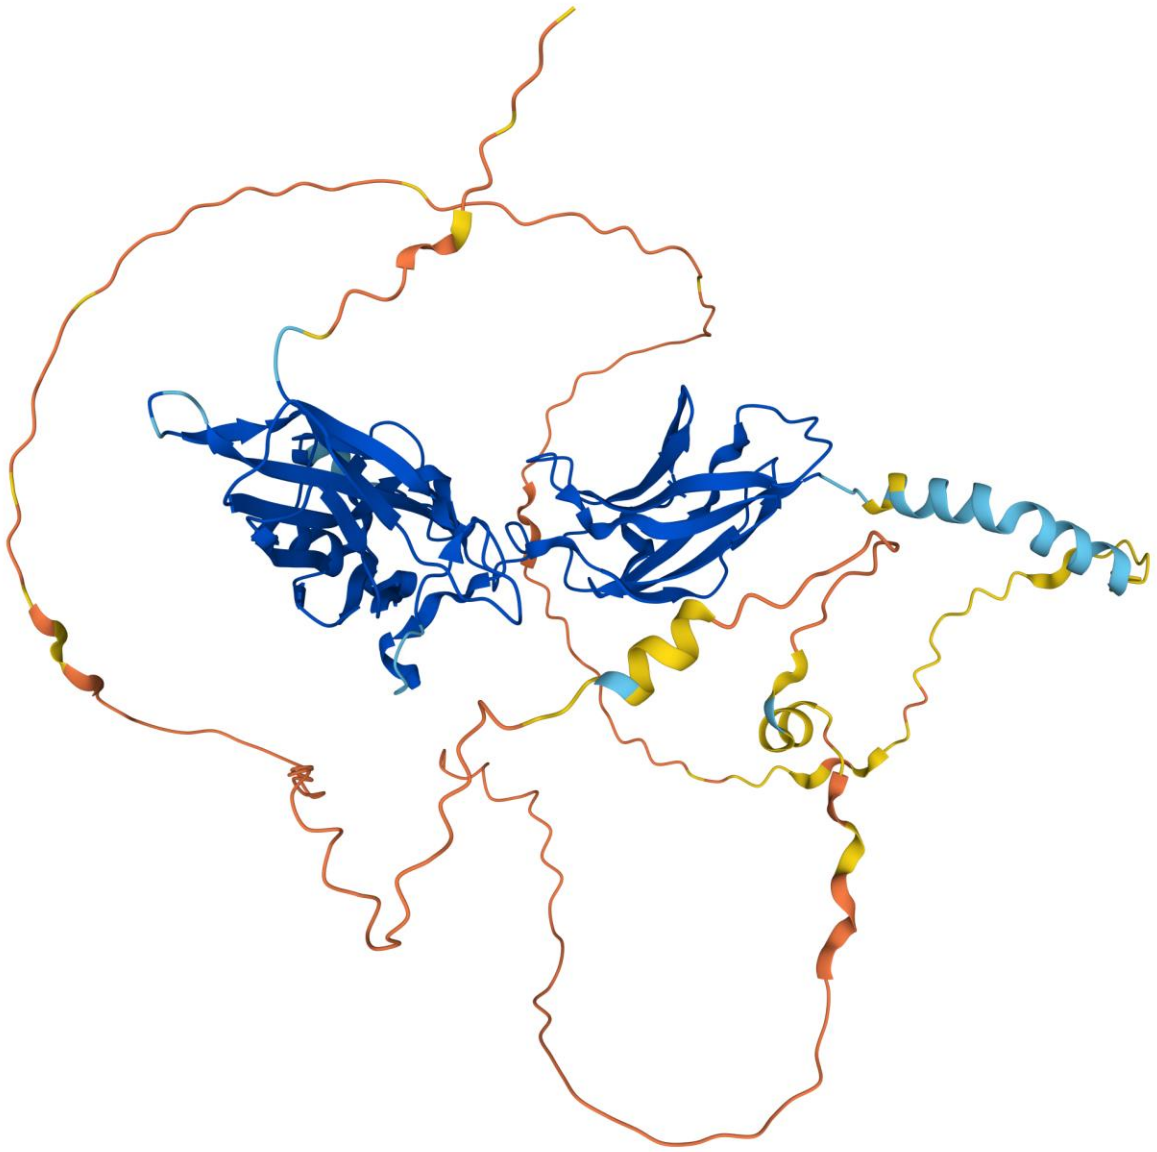



```

>sp|P19838|NFKB1_HUMAN Nuclear factor NF-kappa-B p105 subunit OS=Homo sapiens OX=9606
GN=NFKB1 PE=1 SV=2
MAEDDPYLGRPEQMFHLDPSLTHTIFNPEVFQPPQMALPTDGPYLQILEQPKQGRGFRFRYVCEGPSHGGLPGASSEKNKKSYPQVK
ICNYVGPAAKIVIVQLVTNGKNIHLHAHSLVGKHCEDGICTVTAGPKDMVVGAFANLILHVTKKKVFETLEARMTEACIRGYNPGLL
VHPDLAYLQAEGGGDRQLGDREKELIRQAALQQTKEMDLSVVRLMFTAFLPDSTGSFTRRLEPVVSDAIYDSKAPNASNLKIVRM
DRTAGCVTGGEIYLLCDKVQKDDIQIRFYEEEEENGGVWEGFGDFSPTDVHRQFAIVFKTPKYKDINITKPASVVFVQLRRKSDLE
TSEPKPFLYYPEIKDKKEEVQRKRQKLMFNFSDSFGGSGAGAGGGGMFGSGGGGGGTGSTGPGYSFPHYGFPTYGGITFHPGTTK
SNAGMKHGTMDTESKKDPEGCDKSDDKNTVNLFGKVIETTEQDQEPSEATVGNGEVTLTYATGTKEESAGVQDNLFLEKAMQLAK
RHANALFDYAVTGDVKMLLAVQRHLTAVQDENGDSVLHLAI IHLHSQLVRDLLEVTSGLISDDI INMRNDLYQTPHLHAVITKQE
DVVEDLLRAGADLSLLDRLGNSVLHLAAKEGHDKVLSILLKHKKAALLLDHPNGDGLNAIHLAMMSNSLPCLLLLVAAGADVNAQ
EQKSGRTALHLAVEHDNISLAGCLLLEGDHVDSTTYDGTTPHLIAAGRGSTRLAALLKAAGADPLVENFEPLYDLDDSWENAGE
DEGVVPGTTPLDMATSWQVFDILNGKPYEPEFTSDDLLAQGDMKQLAEDVKLQLYKLEIPDPDKNWATLAQKLGLGILNNAFRL
SPAPSKTLMNDYEVSGGTVRELVEALRQMGYTEAIEVIQAASSPVKTTTSAHSLPLSPASTRQQIDELRDSVCDSGVETSFRK
LSFTESLTSGASLLTLNKMPHDYQGEGPLEGKI

```

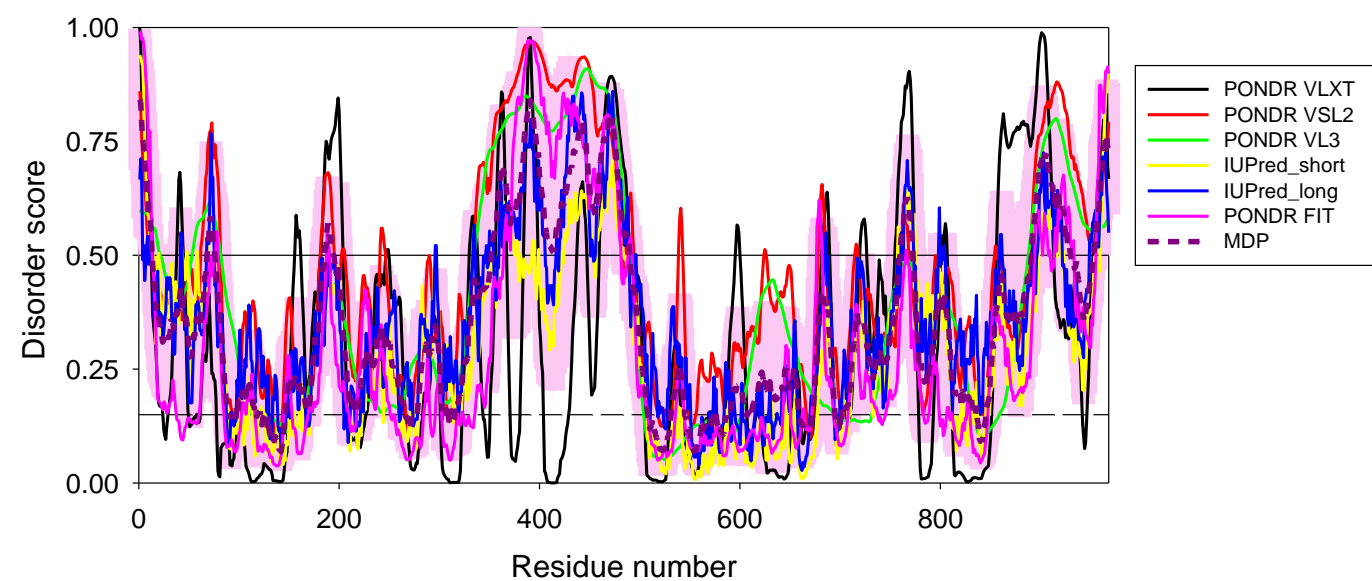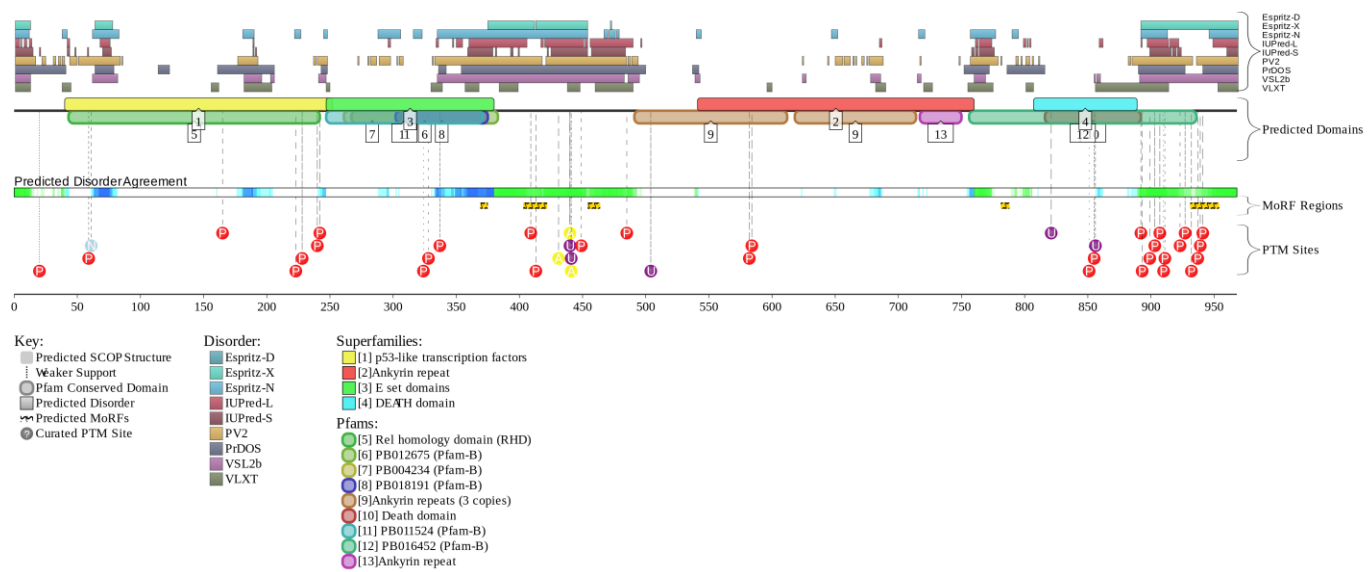

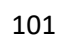

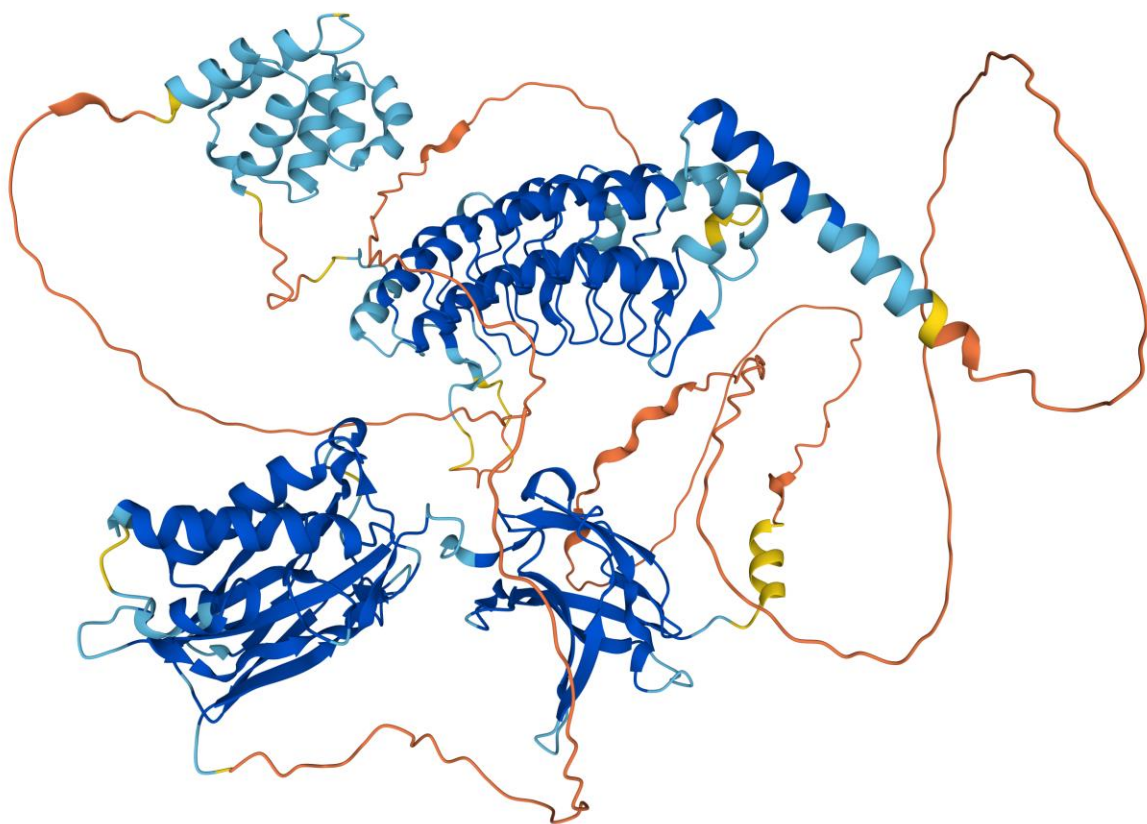



```

>sp|Q00653|NFKB2_HUMAN Nuclear factor NF-kappa-B p100 subunit OS=Homo sapiens OX=9606
GN=NFKB2 PE=1 SV=4
MESCYNPLDGIIEYDDFKLNSSIVEPEKAPETADGPYLVIVEQPKQGRGFRFRYGCCEGSPHGGLPGASSEKGRKTYPTVKICNY
EGPAKIEVDLVTHSDPPRAHAHSLVGKQCSELGICAVSVGPKDMTAQFNNLGVLVHTKKNMMGMTMIQKLQRQRLSRPQGLTEAE
QRELEQEAKELKKVMDLSIVRLRFS AFLRASDGSFSLPLKPVISQPIHDSKSPGASNLKISRMDKTAGSVRGGDEVYLLCDKVQK
DDIEVRFYEDDENGWQAFGDFSPTDVHKQYAI VFRTPPYHKMKIERPVTVFLQLKRKRGGDVSDSKQFTYYPLVEDKEEVQRKR
KALPTFSQPFGGGSHMGGGSGGAAGGYGGAGGGGSLGFFPSSLAYSPYQSGAGPMGCYPGGGGGAQMAATVPSRDSGEEAAEPSA
PSRTPQCEPQAP EMLQRAREYNARLFLGLAQRSARALLDYGVTDARALLAGQRHLLTAQDENGDTPLHLAI IHGQTSVIEQIVYV
IHHAQDLGVVNLTNHLHQTPHLHLAVITGQTSVVSFLLRVGADPALLDRHGDSAMHLALRAGAGAP ELLRALLQSGAPAVPQLLHM
PDFEGLYPVHLAVRARSPECLDLLVDSGAEVEATERQGGRTALHLATEMEELGLVTHLVTKLRANVNARTFAGNTPLHLAAGLGY
PTLTRLLLKAGADIHAENEEPLCPLPSPPTSDSDSDEGPEKDTRSSFRGHTPLDLTCSTKVKTLLLNAAQNTMEPPLTPSPAG
PGLSLGDTALQNLEQLLDGPEAQGSWAELAERLGLRSLVDTYRQTTSPSGSLLSYELAGGDLAGLLEALSMDMGLEEGVRLLRGP
ETRDKLPSTA EVKEDSAYGSQSVEQEA EKLGPPEPPGGGLCHGHPQPQVH

```

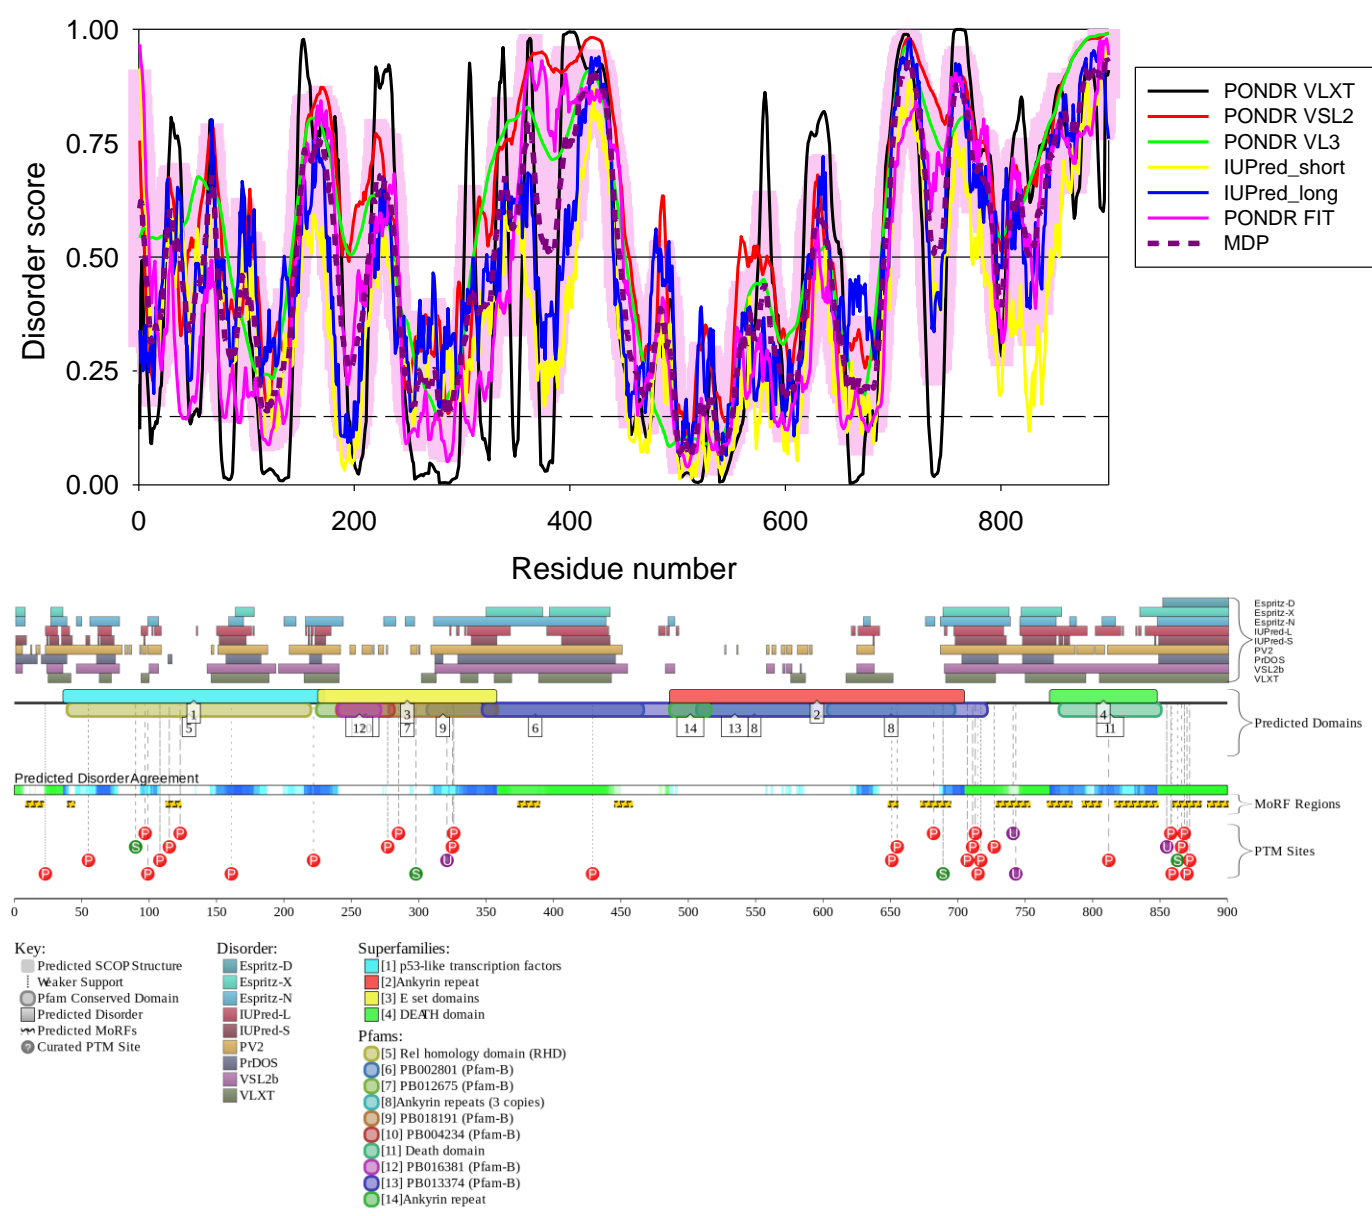

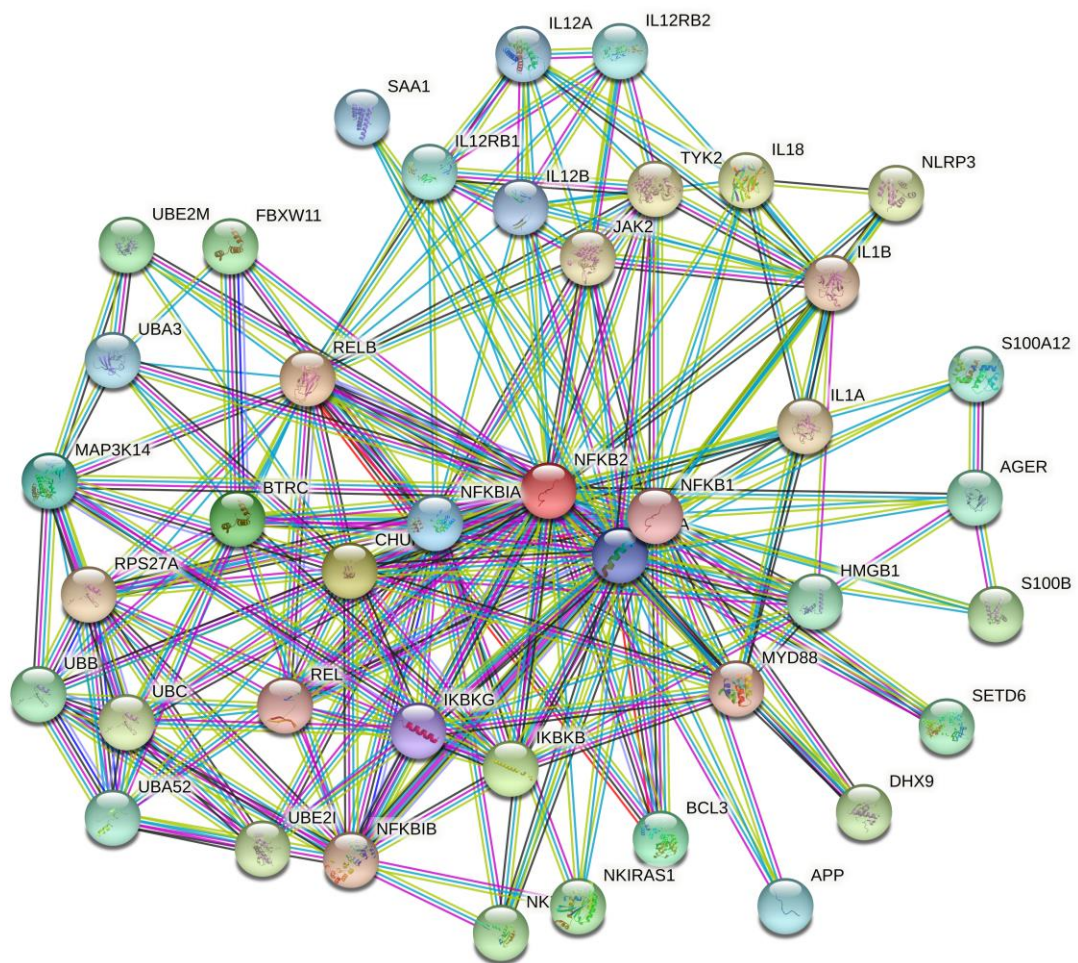

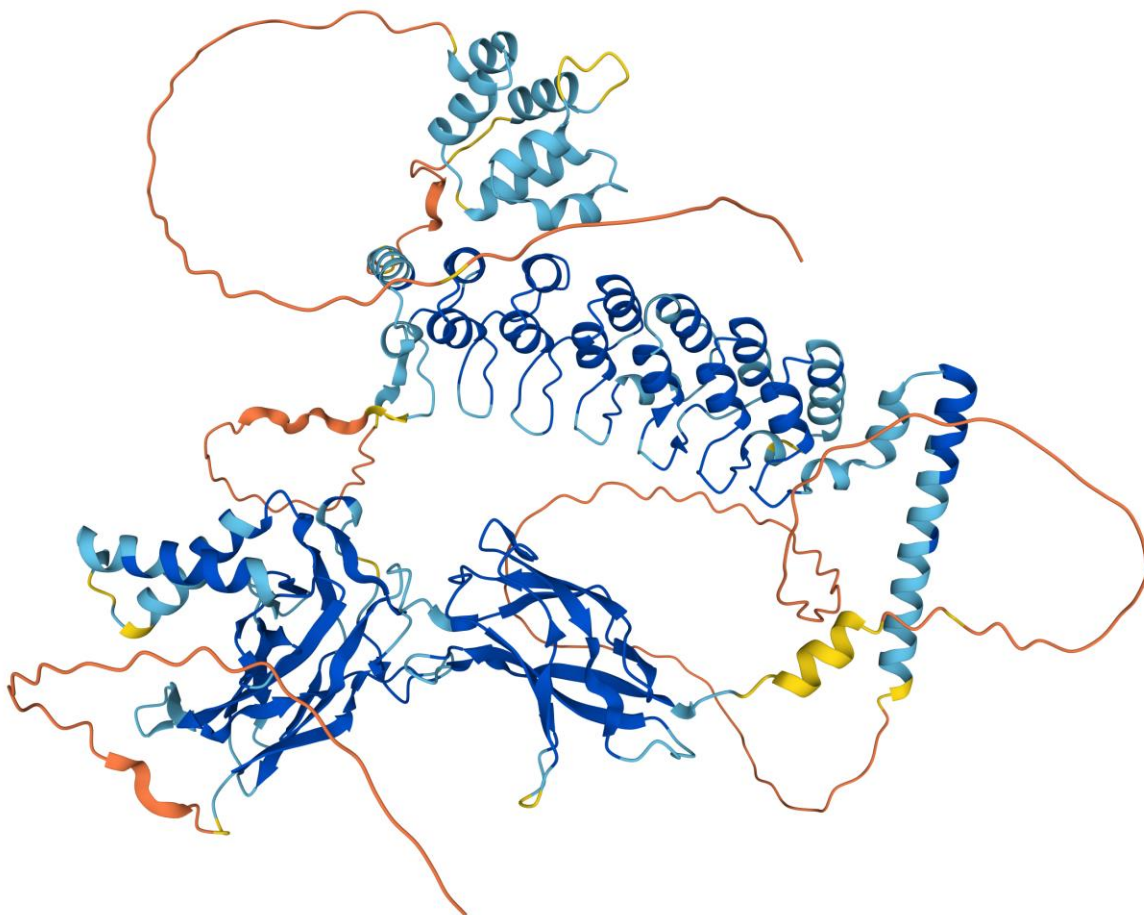



```
>sp|Q14653|IRF3_HUMAN Interferon regulatory factor 3 OS=Homo sapiens OX=9606 GN=IRF3
PE=1 SV=1
MGTPKPRILPWLVSQDLGQLEGVAWVNKSRTFRIPWKHGLRQDAQQEDFGIFQAWAEATGAYVPGRDKPDLPWKRNFERSALN
RKEGLRLAEDRSKDPHPHKIYEFVNSGVGDFSQPDTSPTDNGGGSTSDTQEDILDLLGNMVLAPLPDPGPPSLAVAPEPCQP
LRSPSLDNPTFPFNLGPSENPLKRLLLVPGEWEFEVTAIFYRGRQVFQQTISCPEGLRLVGSEVGDRTLPGWFPVTLDPGMSLTDR
GVMSYVRHVLSCGGGLALWRAGQWLWAQRLGHCHTYWAVSEELLPSNGHGPDPGEVPKDKEGGVFDLGPFIVDLITFTEGSGRSP
RYALWFCVGESWPQDQDPWTKRLVMKVVPVPTCLRALVEMARVGGASSLENTVDLHISNSHPLSLTSDQYKAYLQDLVEGMDFQGGP
ES
```

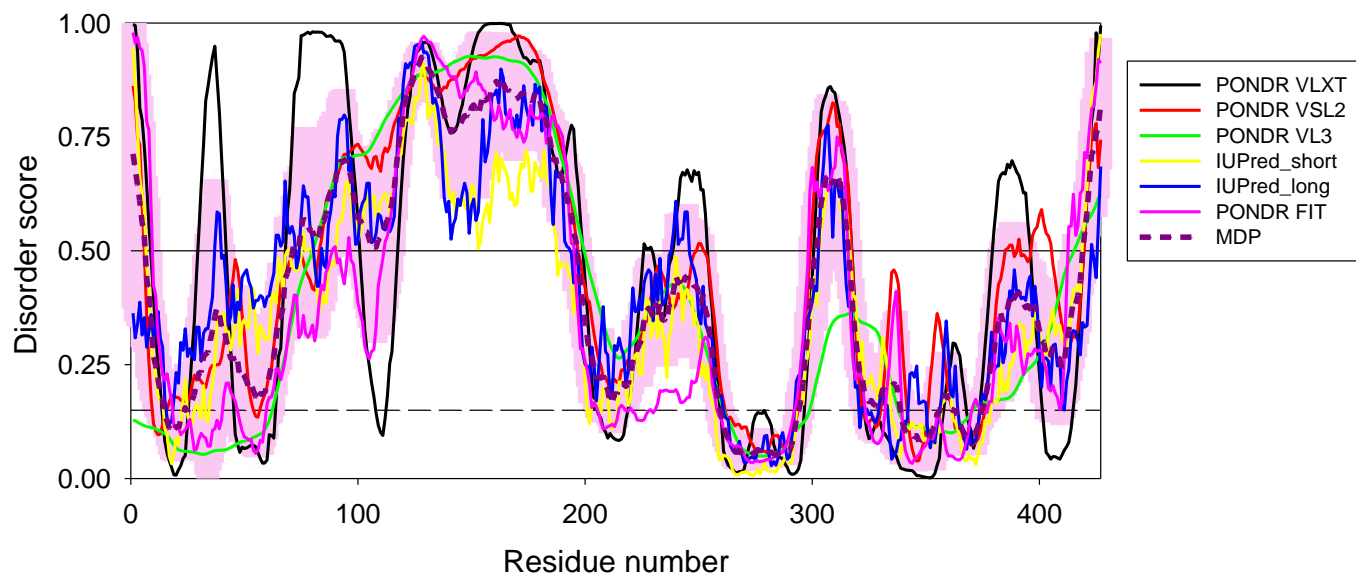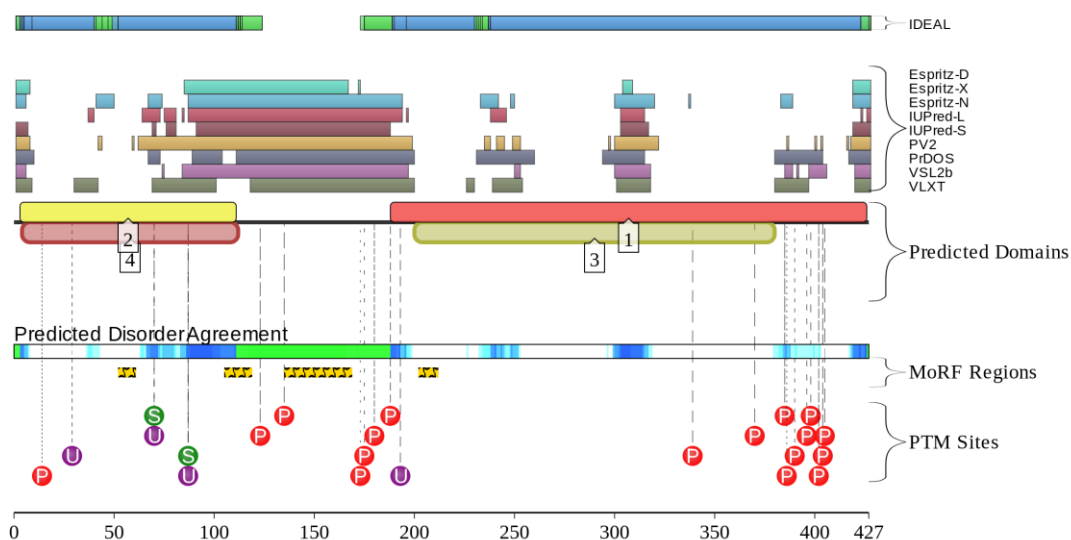

Key:

- Predicted SCOP Structure
- Weaker Support
- Pfam Conserved Domain
- Predicted Disorder
- Predicted MoRFs
- Curated PTM Site

Disorder:

- Espritz-D
- Espritz-X
- Espritz-N
- IUPred-L
- IUPred-S
- PV2
- PrDOS
- VSL2b
- VLXT

Superfamilies:

- [1] SMAD/FHA domain
- [2] "Winged helix" DNA-binding domain

Pfams:

- [3] Interferon-regulatory factor 3
- [4] Interferon regulatory factor transcription factor

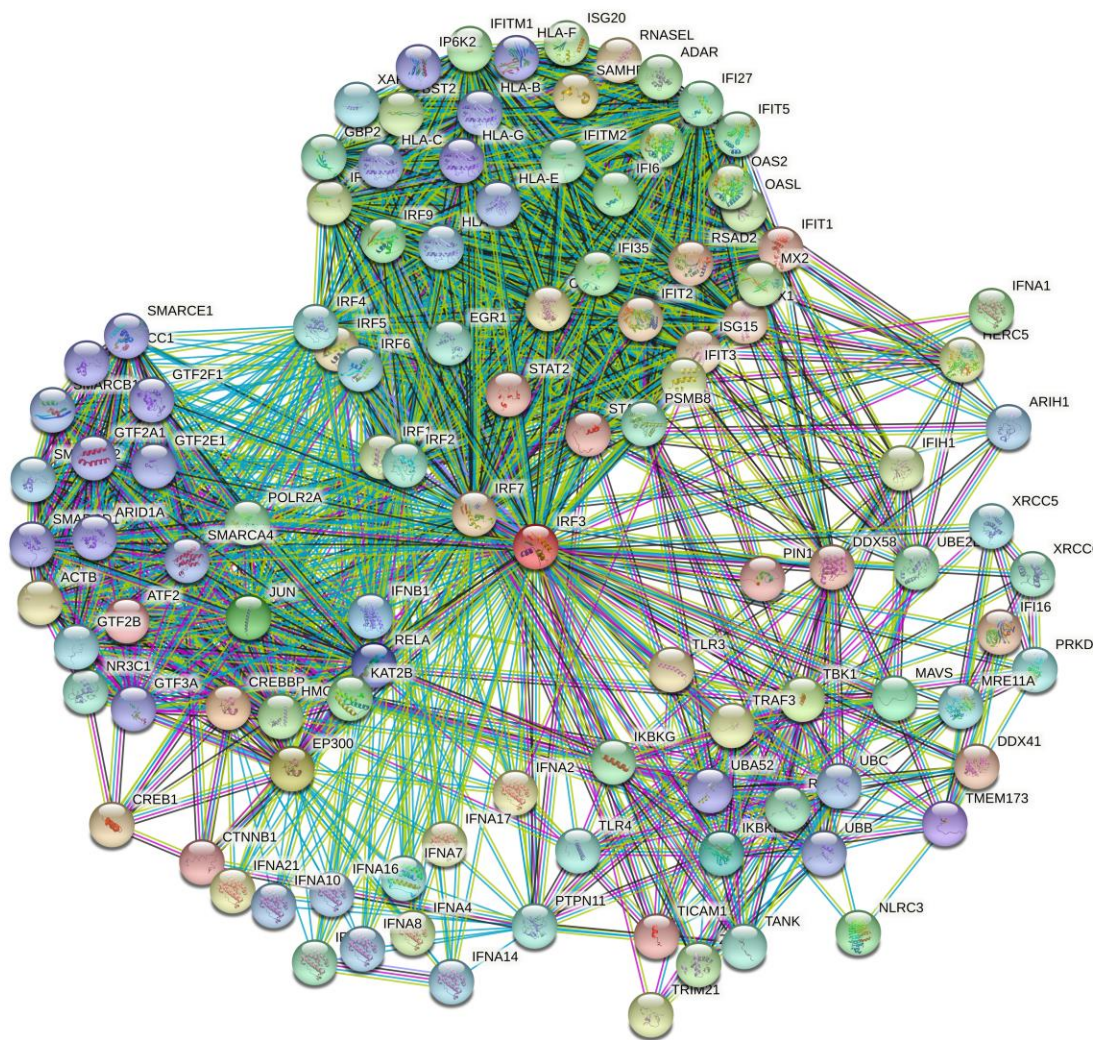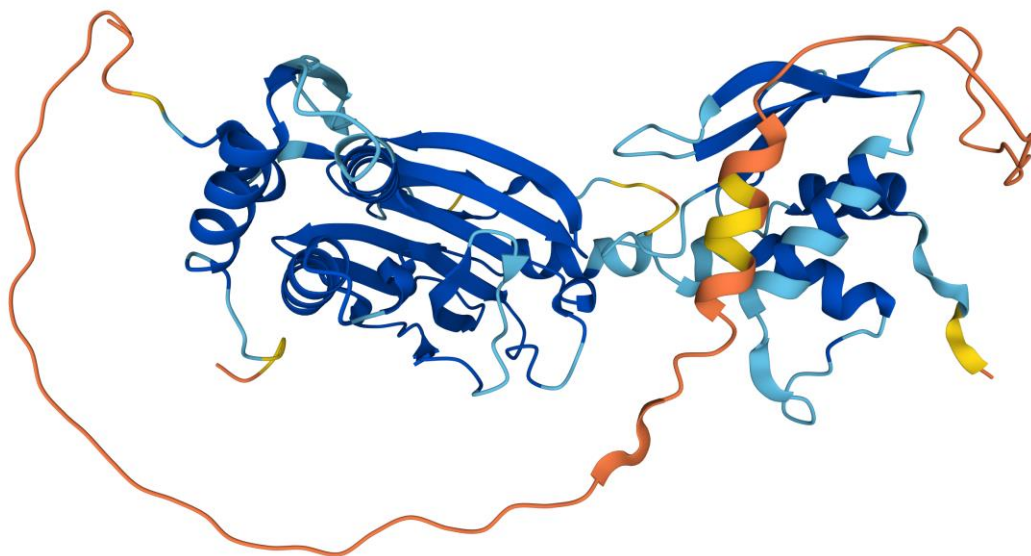

```
>sp|Q13568|IRF5_HUMAN Interferon regulatory factor 5 OS=Homo sapiens OX=9606 GN=IRF5
PE=1 SV=2
MNQSIPVAPTPPRRVRLKPWLVAQVNSCQYPGLQWVNGEKKLFCIPWRHATRHGPSQDGDNTIFKAWAKETGKYTEGVDEADPAK
WKANLRCALNKS RDRFLIYDGRDMPPQPYKIYEVCNSGPAPTDSQPPEDYSFGAGEEEEEEEELQRM LPSLSLTEDVKWPPTLQ
PPTLRPPTLQPPTLQPPVVLGPPADPSP LAPP PGNPAGFRELLSEVLEPGPLPASLP PAGEQLLPDLLISPHMLPLTDLEIKFQ
YRGRPPRALTISNPHGCR LFYSQLEATQE QVELFGPI SLEQVRFPSPEDIPSDKQRFYTNQLLDVLDRLILQLQGQDLYAIRLC
QCKVFWSGPCASAH DSCPNPIQREVKT KLFSL EHF LNELILFQKGQTNTPPPFEIFFCFGE EWPDRKPREKKLITVQVVPVAARL
LLEMFSGELSW SADSIRLQISNPDLKDRMVEQFKELHHIWQSQQRLQPV AQAPP GAGLGVGQGPWPMHPAGMQ
```

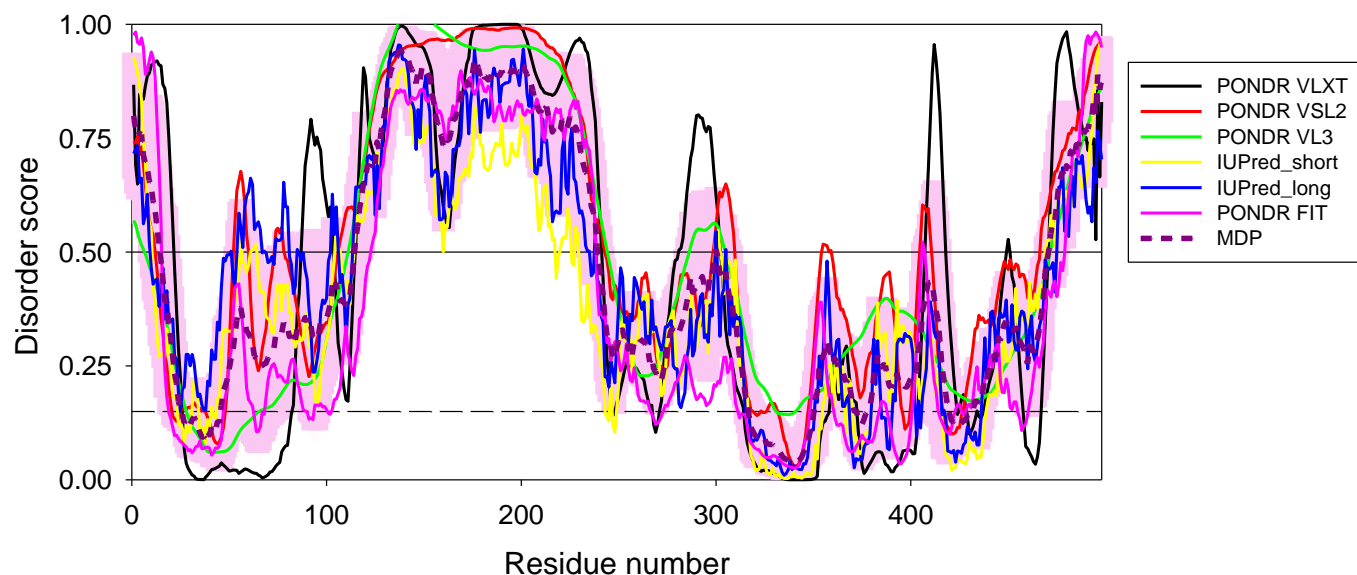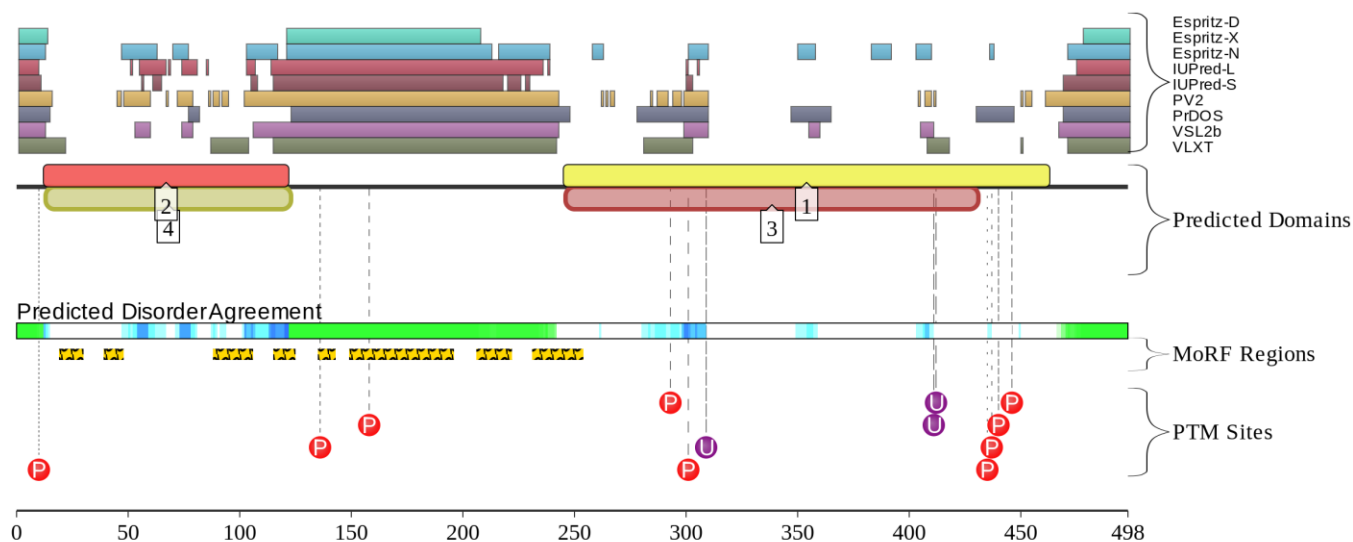

**Key:**

- Predicted SCOP Structure
- ⋯ Weaker Support
- Pfam Conserved Domain
- Predicted Disorder
- ⋯ Predicted MoRFs
- ⊙ Curated PTM Site

#### Disorder:

- Espritz-D
- Espritz-X
- Espritz-N
- IUPred-L
- IUPred-S
- PV2
- PrDOS
- VSL2b
- VLXT

#### Superfamilies:

- [1] SMAD/FHA domain
- [2] "Winged helix" DNA-binding domain

#### Pfams:

- [3] Interferon-regulatory factor 3
- [4] Interferon regulatory factor transcription factor



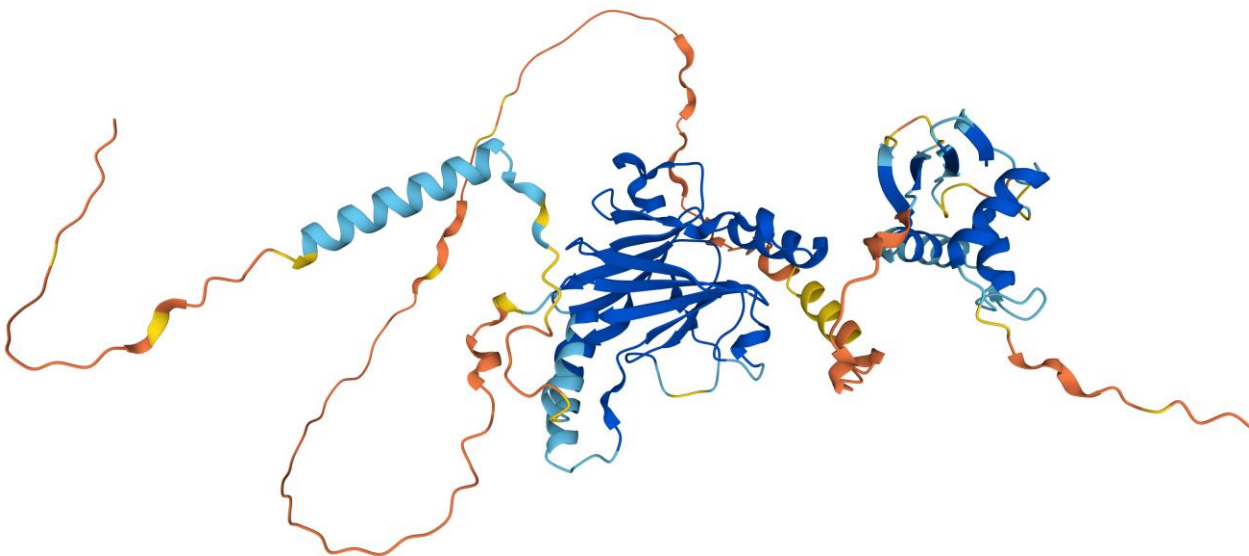

```
>sp|Q92985|IRF7_HUMAN Interferon regulatory factor 7 OS=Homo sapiens OX=9606 GN=IRF7
PE=1 SV=2
MALAPERAAAPRVLFGEWLLGEISSGCIYGLQWLDEARTCFRVPWKHFARKDLSEADARIFKAWAVARGRWPPSSRGGGPPPEAET
AERAGWKTNFRCALRSTRRFVMLRDN SGDPADPHKVYALSRELWCWREGPGTDQTEAEAPAAVPPPQGGPPGPF LAHTHAGLQAPG
PLPAPAGDKGDL LLQAVQQSCLADHLLTASWGADFPVPTKAPGEGQEGLPLTGACAGGPGLPAGELYGWAVETTPSPGPQPAALTT
GEAAAPESPHQAEPYLSPPSACTAVQEPSPGALDVTIMYKGRITVLQKVVGHPSCFTLYGPPDPAVRATDPQQVAFPSPAELPDQ
KQLRYTEELLRHVAPGLHLELRGPQLWARRMGKCKVYWEVGGPPGSASPSTPACLLPRNCDTPIFD FRVFFQELVEFRARQRRGS
PRYTIYLGFGQDL SAGRPKEKSLVLVKLEPWL CRVHLEGTQREGVSSLDSSSLSLCLSSANS LYDDIECF LMELEQPA
```

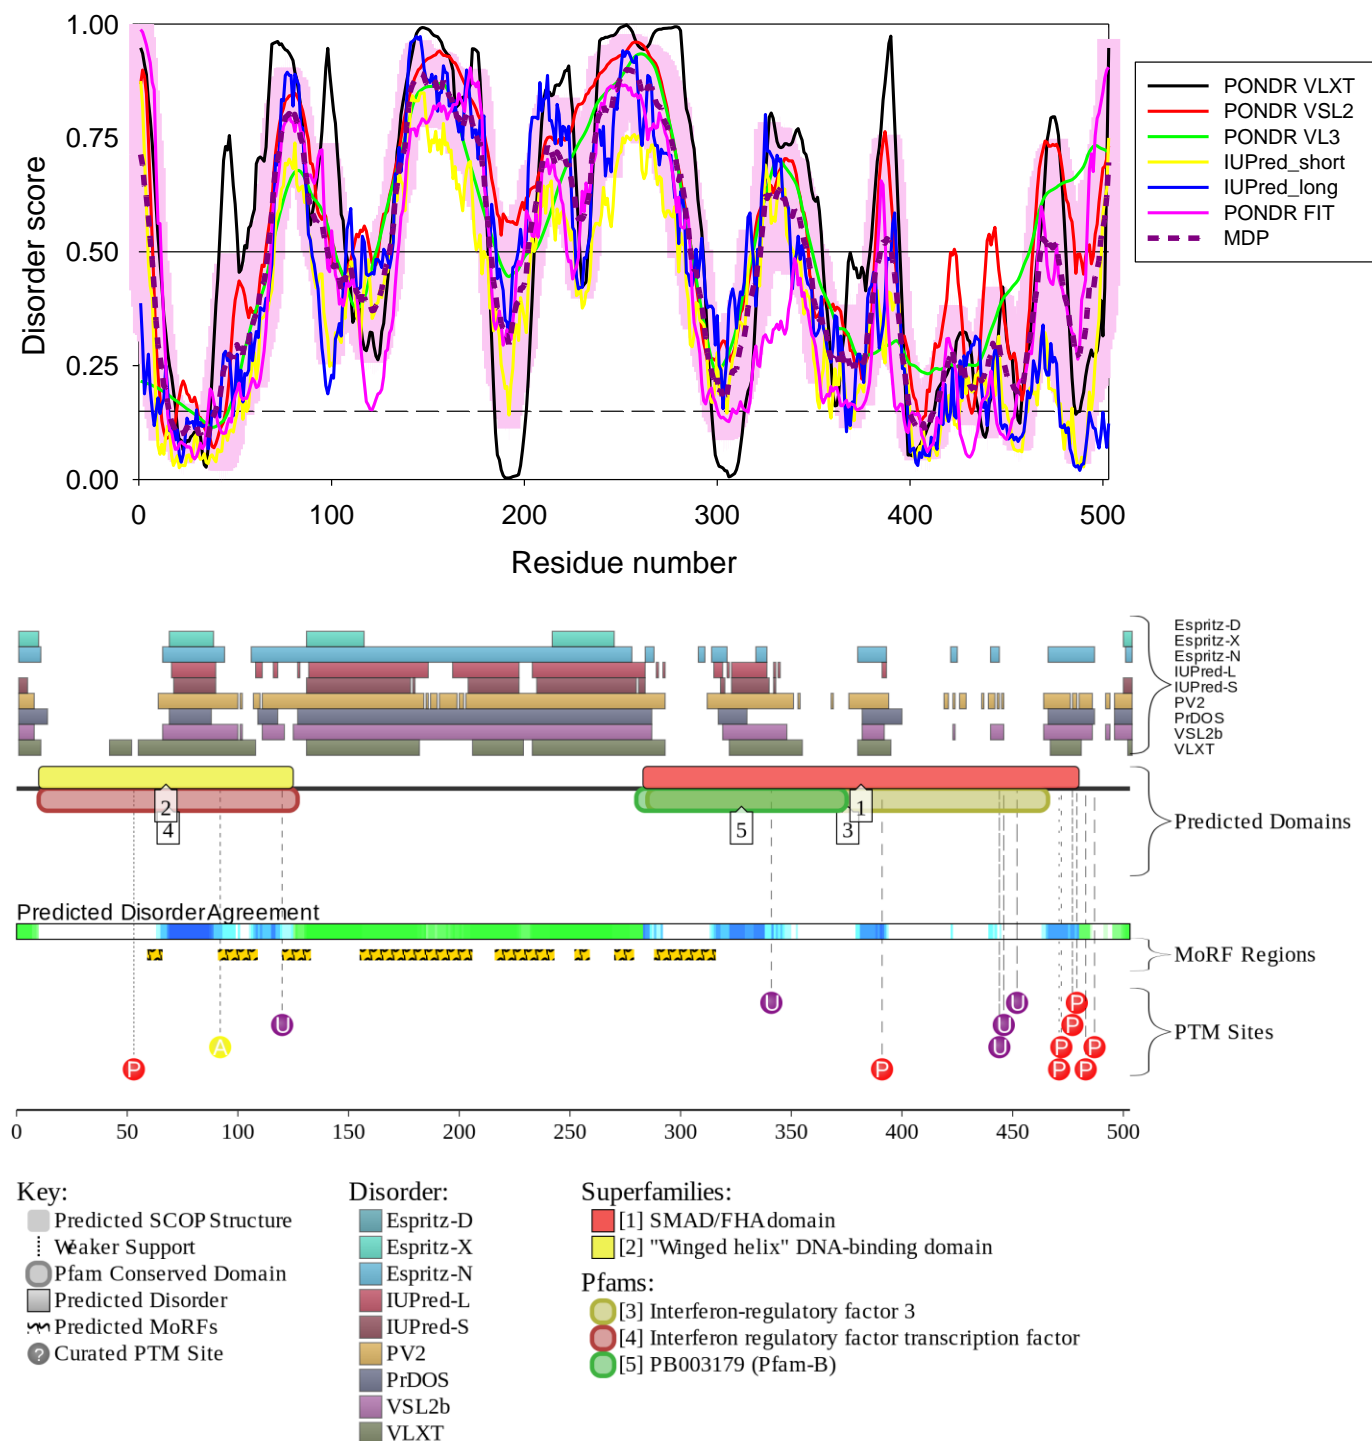



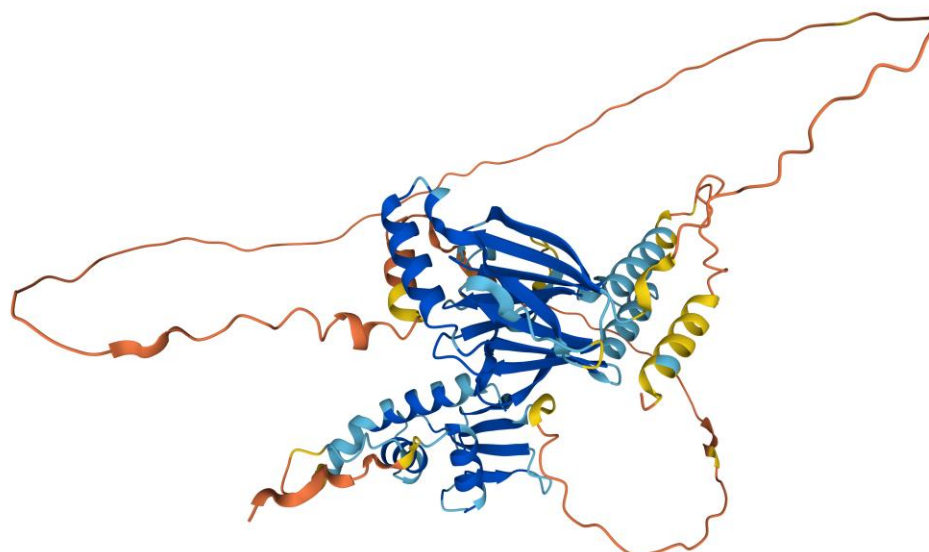



```
>sp|Q9UHD2|TBK1_HUMAN Serine/threonine-protein kinase TBK1 OS=Homo sapiens OX=9606
GN=TBK1 PE=1 SV=1
MQSTSNHLWLLSDILGQGATANVFRGRHKKTGDLFAIKVFNNISFLRPVDVQMREFEVLKKLNHKNIVKLFAIEEETTTRHKVLI
MEFCPCGSLYTVLEEPSNAYGLPESEFLIVLRDVVGGMNLRENGIVHRDIKPGNIMRVIGEDGQSVYKLTDFGAARELEDDEQF
VSLYGTEEYLHPDMYERAVLRKDHQKKYGATVDLWSIGVTIFYHAATGSLPFRPFEGPRRNKEVMIKIITGKPSGAISGVQKAENG
PIDWSGDMPVSCSLSRGLQVLLTPVLANILEADQEKCWGFDQFFAETSDILHRMVIHVFSLQQMTAHKIYIHSYNTATIFHELVI
KQTKIISNQELIYEGRRLVLEPGRLAQHFPKTTEENPIFVVSREPLNTIGLIYEKISLPKVHPRYDLGDASMAKAITGVVCYA
CRIAFTLLLYQELMRKGIRWLIELIKDDYNETVHKKTEVVITLDFCIRNIEKTVKVYEKLMKINLEAAELGEISDIHTKLLRLSS
SQGTIETSLQDIDSRLSPGGSGLADAWAHQEGTHPKDRNVEKLQVLLNCMTEIYYQFKKDKAERRLAYNEEQIHKFDKQKLYYHAT
KAMTHFTDECVKKYEAFLNKSEEWIRKMLHLRKQLLSLTNQCFDIEEEVSKYQEYTNELQETLPQKMFTASSGIKHTMTPIYPSS
NTLVEMTLGMKKLKEEMEGVVKELAENNHILERFGSLTMDGGLRNVDCL
```

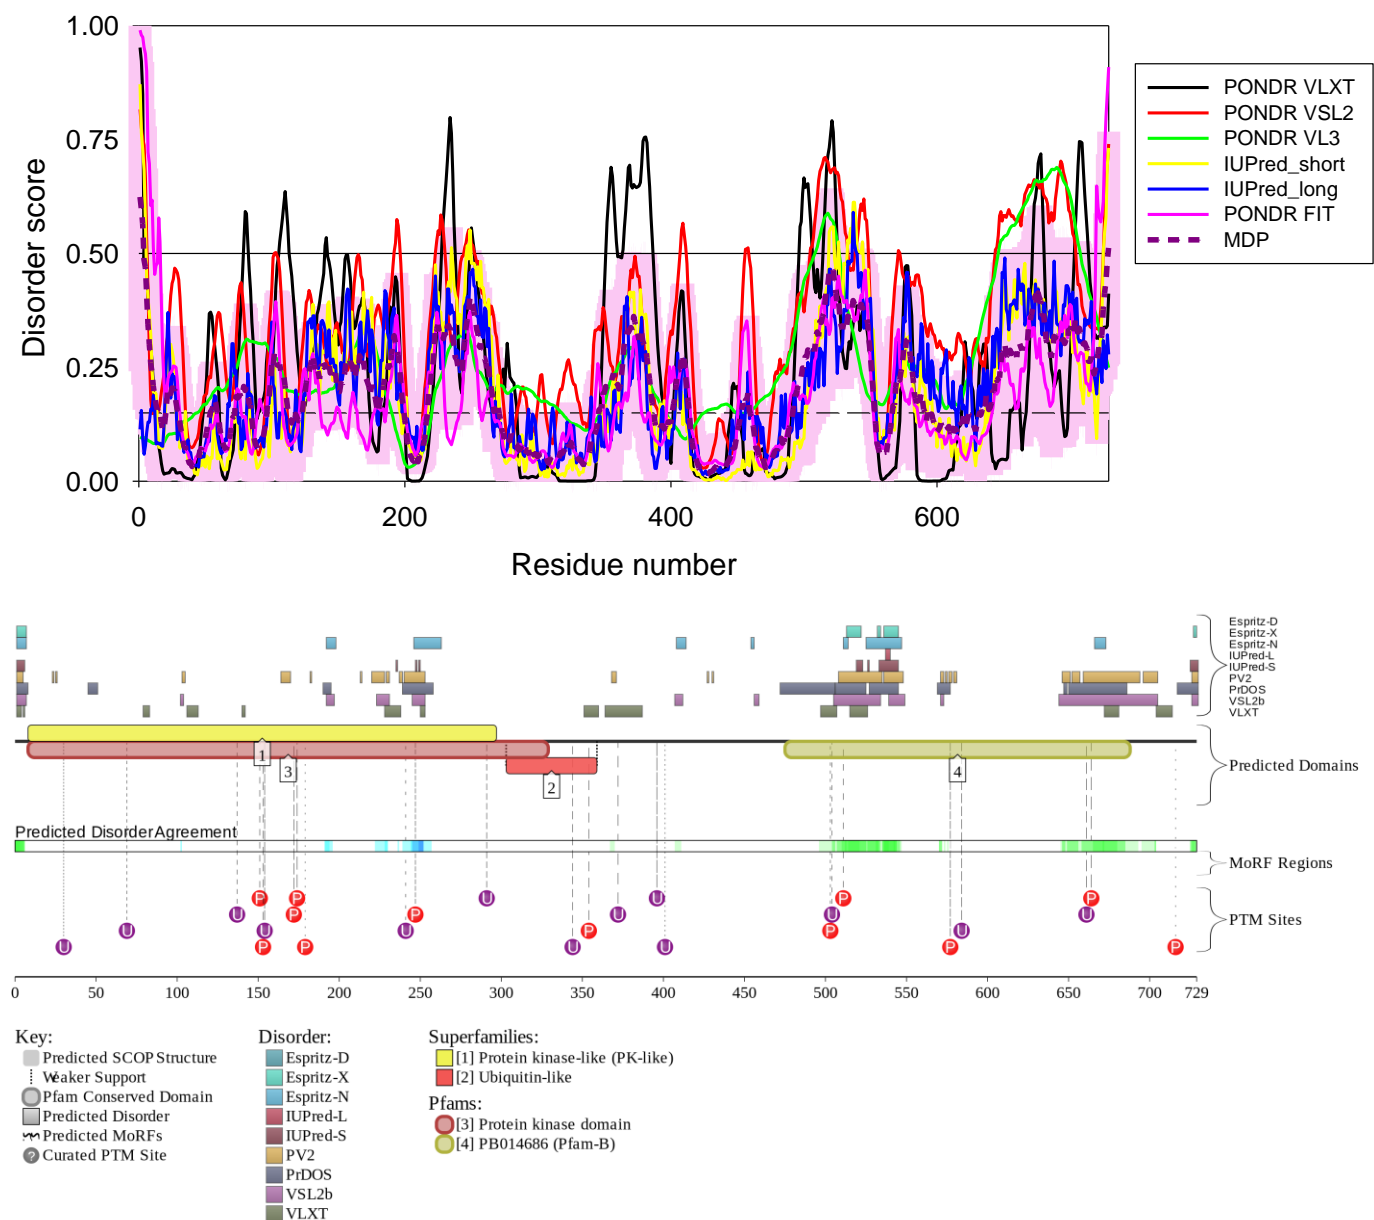

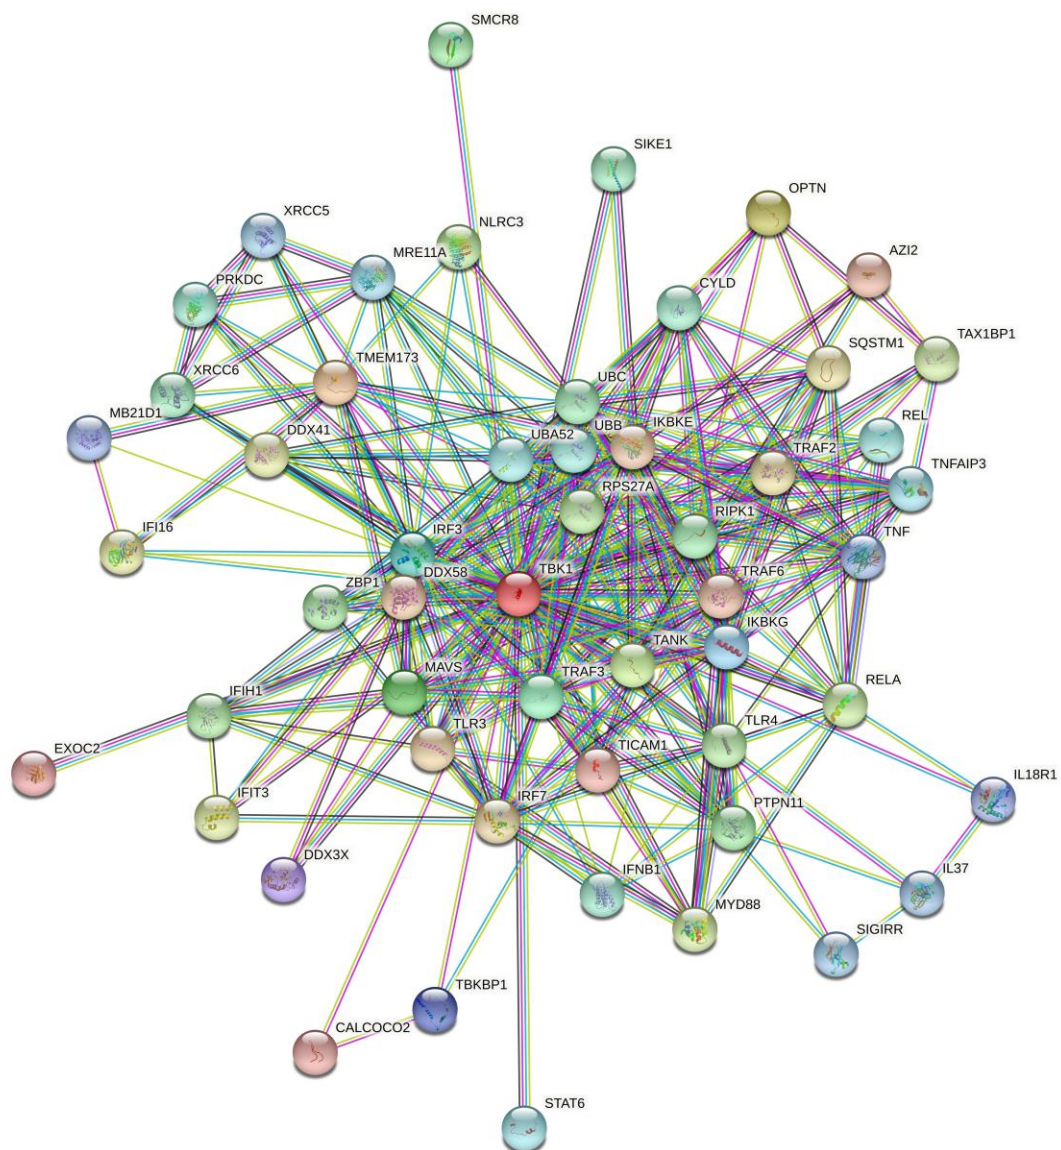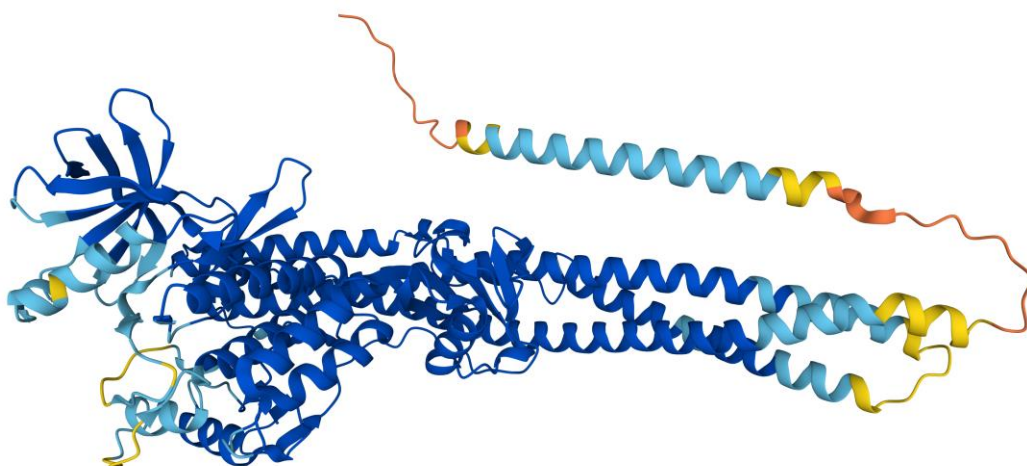

```
>sp|Q92844|TANK_HUMAN TRAF family member-associated NF-kappa-B activator OS=Homo
sapiens OX=9606 GN=TANK PE=1 SV=2
MDKNIGEQLNKAYEAFRQACMDRDSAVKELQQKTENYEQRIREQQEQLSLQQTIIIDKLKSQLLLNVNSTQDNNYGCVPILLEDSETR
KNNLTLDQPQDKVISGIAREKLPKVRREQEVSSPRKETSARSLSGSPLLHERGNIEKTFWDLKEEFHKICMLAKAQKDHLKLNIPD
TATETQCSVPIQCTDKTDKQEALFKPQAKDDINRGAPSITSVTPRGLCRDEEDTSFESLSKFNVKFPPMDNDSTFLHSTPERPGI
LSPATSEAVCQEKFNMEFRDNPNGNFVKTEETLFEIQGIDPIASAIQNLKTTDKTKPSNLVNTCIRTTLDRACLPPGDHNLALYVN
SFPLLDPSDAPFPSPDPSGKAIRGPPQPIWKPFNPQDSDSVVLSGTDSELHIPRVCEFCQAVFPPSITSRGDFLRHLNHSFNGET
```

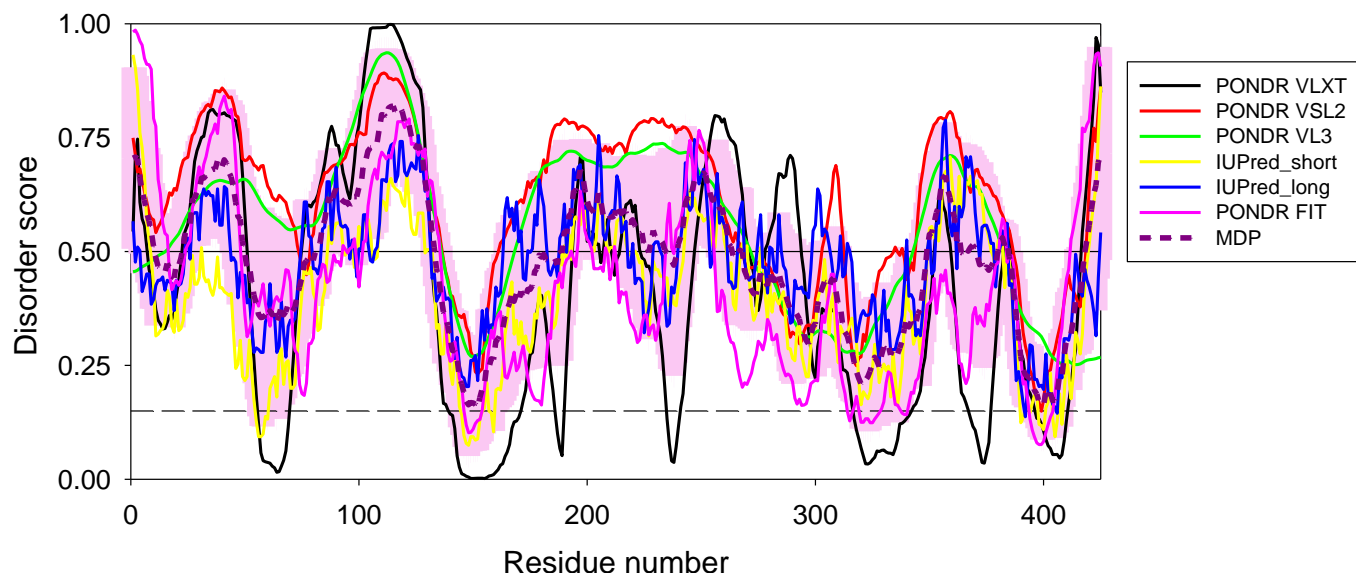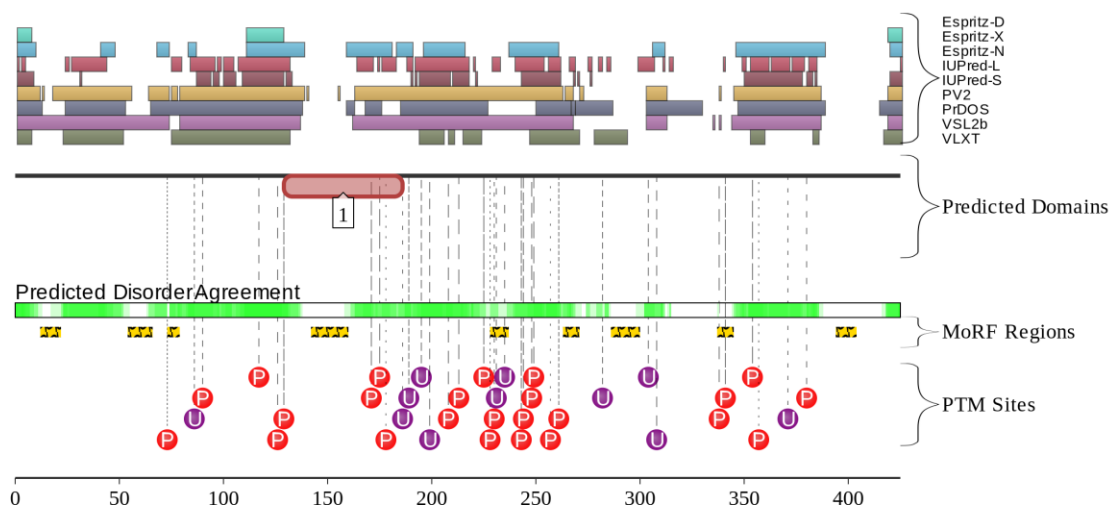

Key:

- Predicted SCOP Structure
- Weaker Support
- Pfam Conserved Domain
- Predicted Disorder
- Predicted MoRFs
- Curated PTM Site

Disorder:

- Espritz-D
- Espritz-X
- Espritz-N
- IUPred-L
- IUPred-S
- PV2
- PrDOS
- VSL2b
- VLXT

Superfamilies:

N/A No Hits

Pfams:

[1] PF12845.2 (Family)



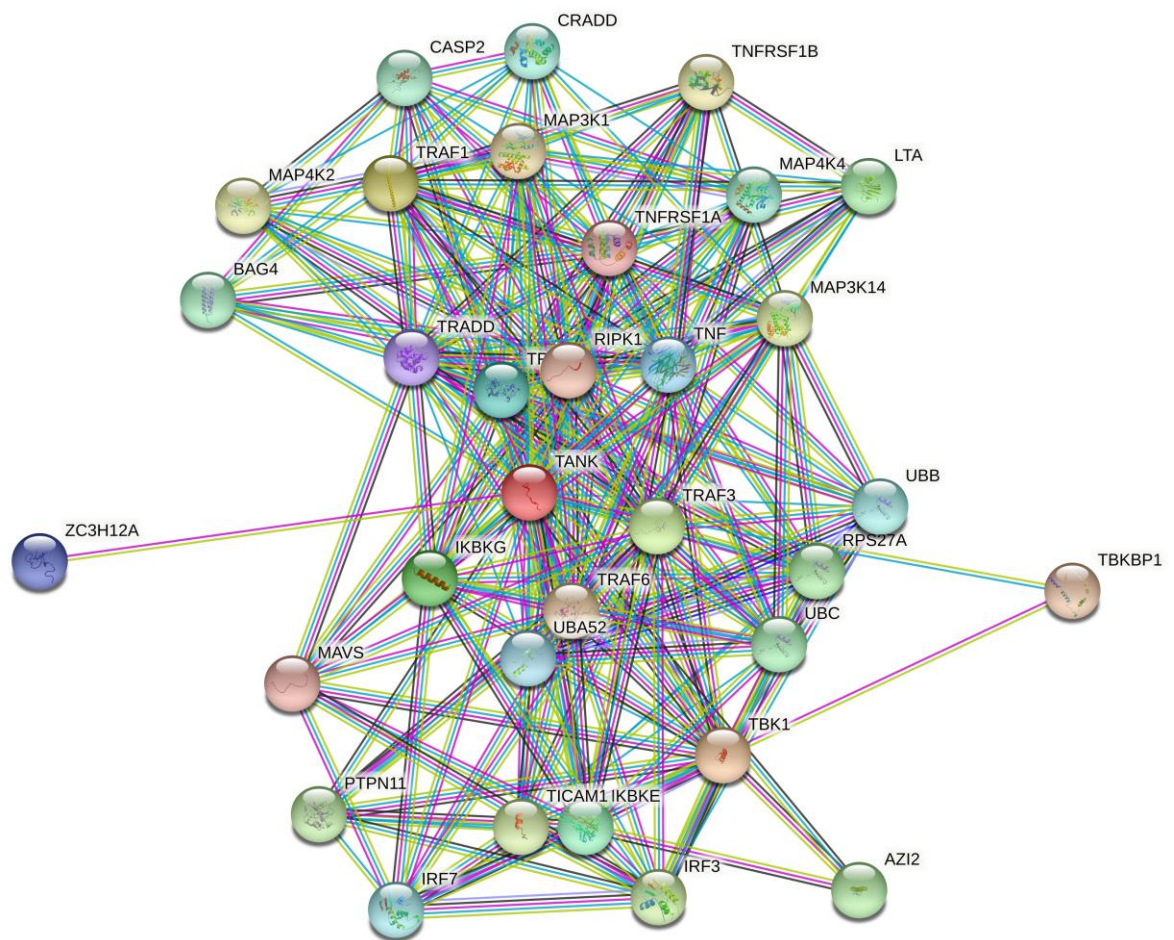

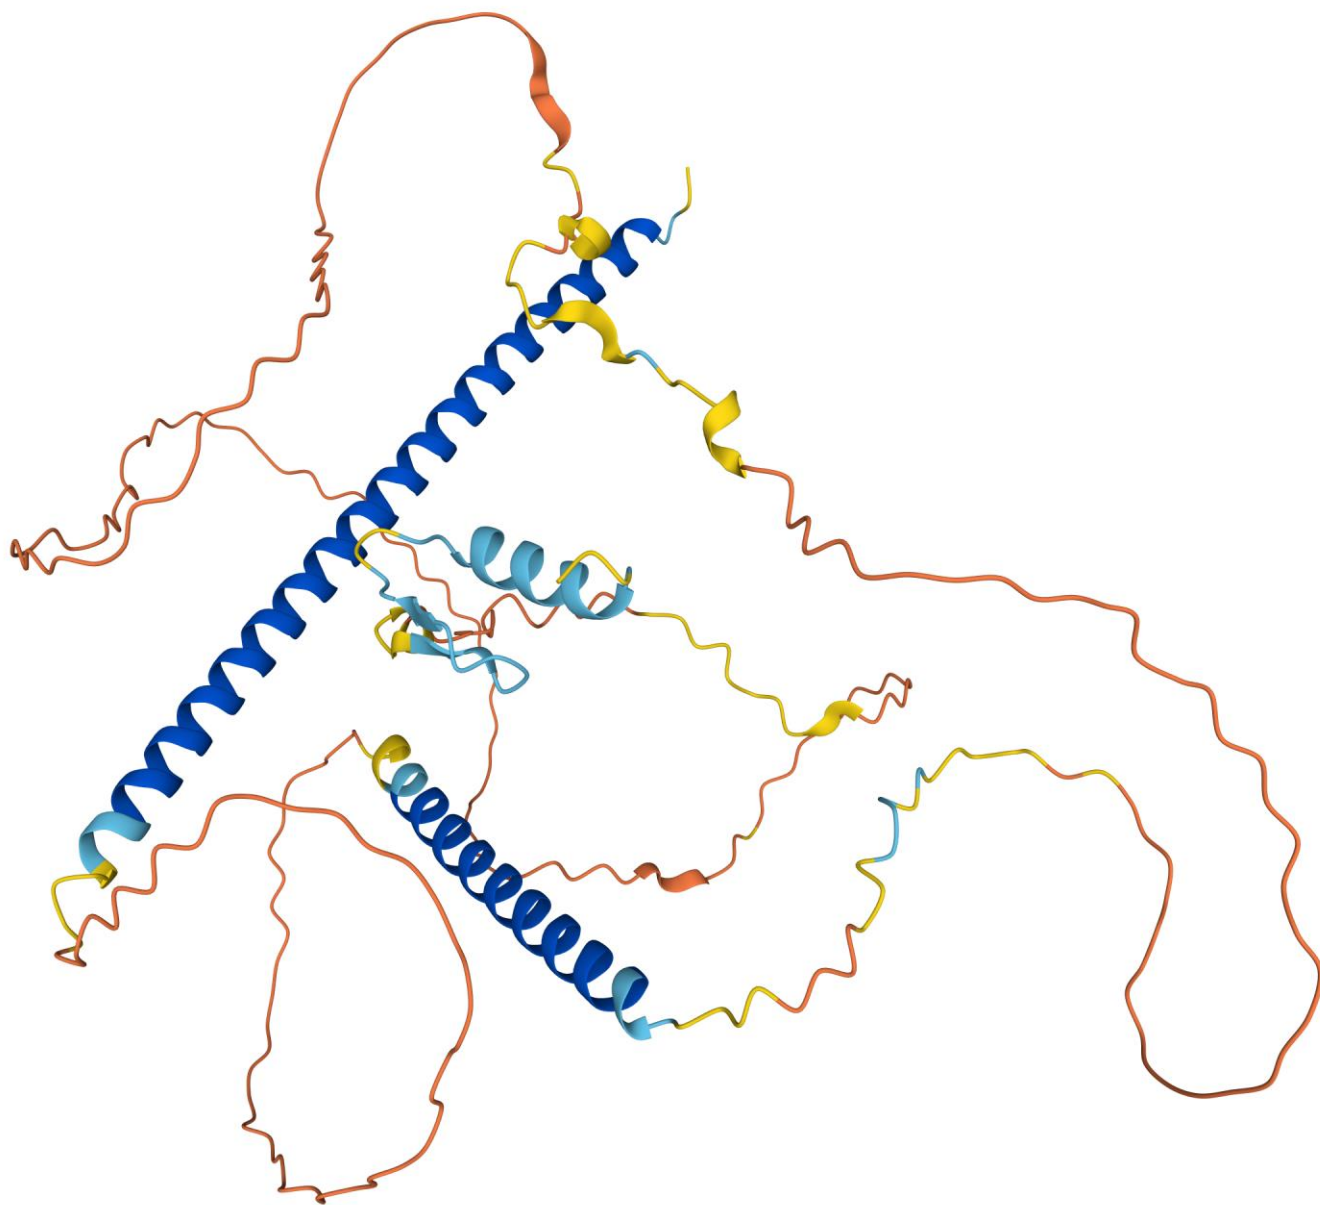

```

>sp|Q8IUC6|TCAM1_HUMAN TIR domain-containing adapter molecule 1 OS=Homo sapiens
OX=9606 GN=TICAM1_TRIF PE=1 SV=1
MACTGPSLPSAFDILGAAGQDKLLYLKHKLKTPRPGCQGQDLLHAMVLLKLGQETEARISLEALKADAVARLVARQWAGVDSTED
PEEPPDVSWAVARLYHLLAEKLCPASLRDVAYQEAVRTLSSRDDHRLGELQDEARNRCGWDIAGDPGSIRTLQSNLGLCLPPSSA
LPSGTRSLPRPIDGVSDWSQGC SLRSTGSPASLASNLEISQSPTMPFSLSLHRS PHGPSKLCDDPQASLVPEFVPGGCQEPPEMSW
PPSGEIASPPELPSSPPPPGLPEVAPDATSTGLPDTAAPETSTNYPVECTEGSAGPQSLPLPILEPVKNPCSVKDQTPQLSVED
TTSPTNTKPCPPTPTTPETSPPPPPPPSSTPCSAHLTPSSLFPSSLESSEQKFYNFVILHARADEHIALRVREKLEALGVDPGA
TFCEDFQVPGRGELSCLQDAIDHSAFIILLTNSNFDCLSLHQVNQAMMSNLTRQGS PDCVIPFLPLESSPAQLSSDTASLLSGL
VRLDEHSQIFARKVANTFKPHRLQARKAMWRKEQDTRALREQS QHLDGERMQAAALNAAYSAYLQSYLSYQAQMEQLQVAFGSHM
SFGTGAPYGARMPFGGQVPLGAPPPFPTWPGCPQPPPLHAWQAGTPPPPSPQPAAFPQSLPFPQSPAFPTASPAPPQSPGLQPLI
IHHAQMVLQGLNNHNMWNQRGSQAPEDKTQEAE

```

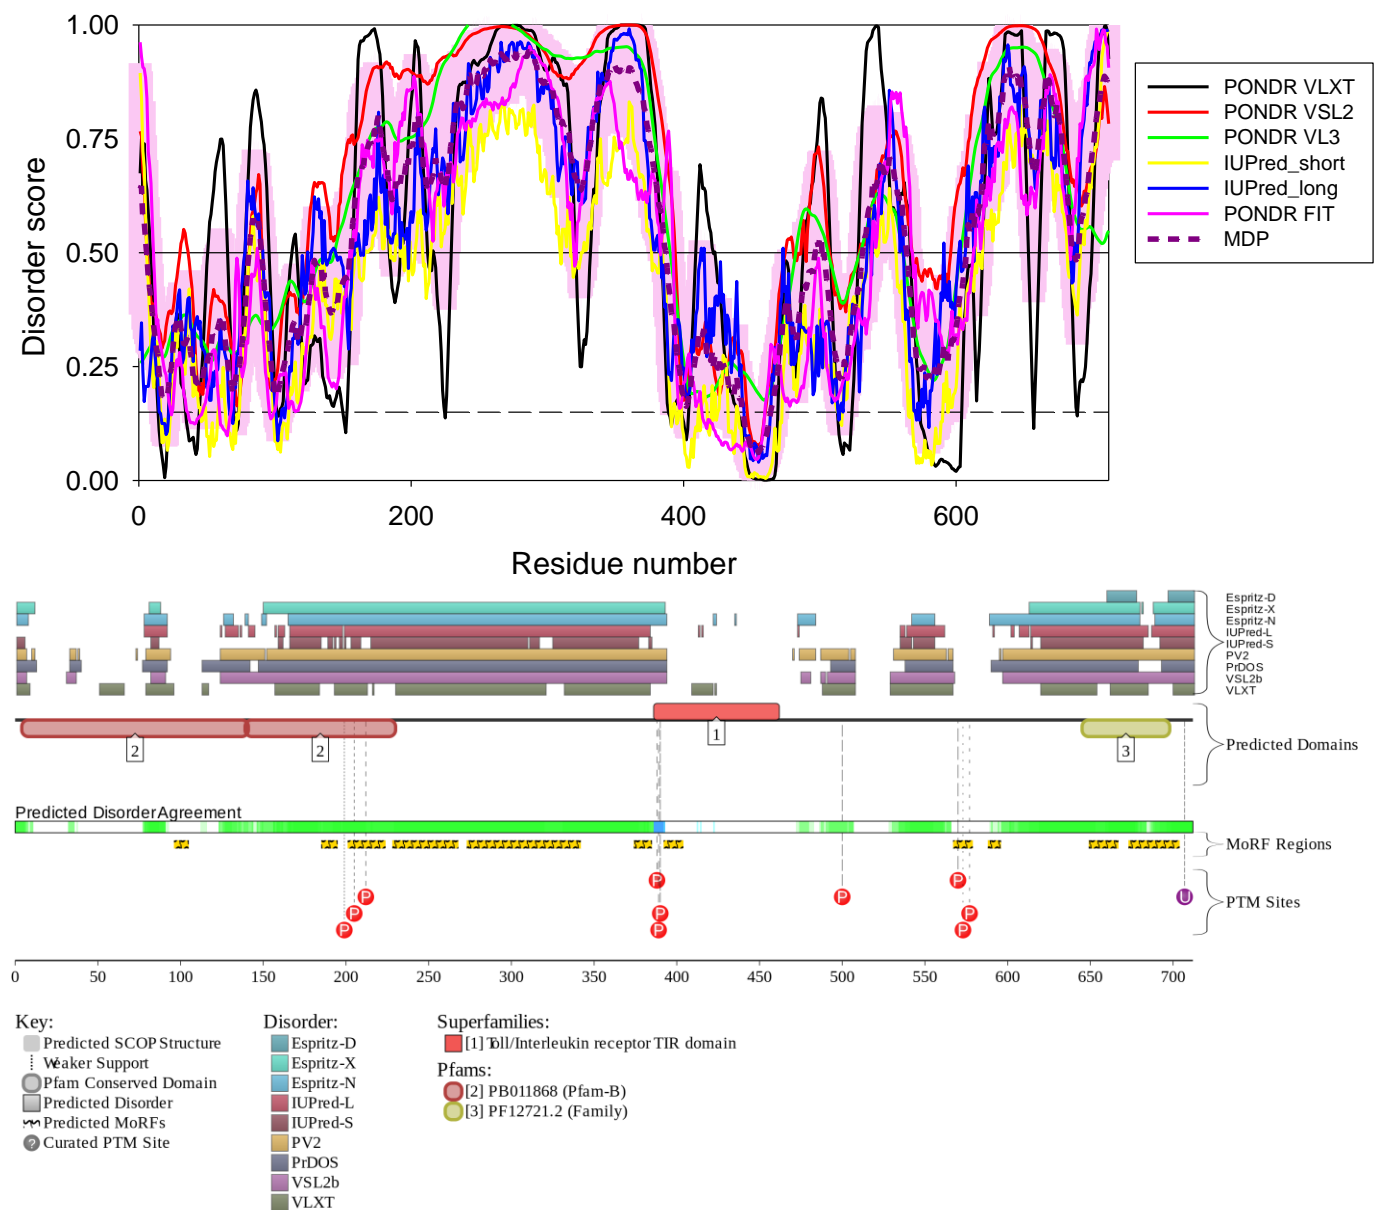



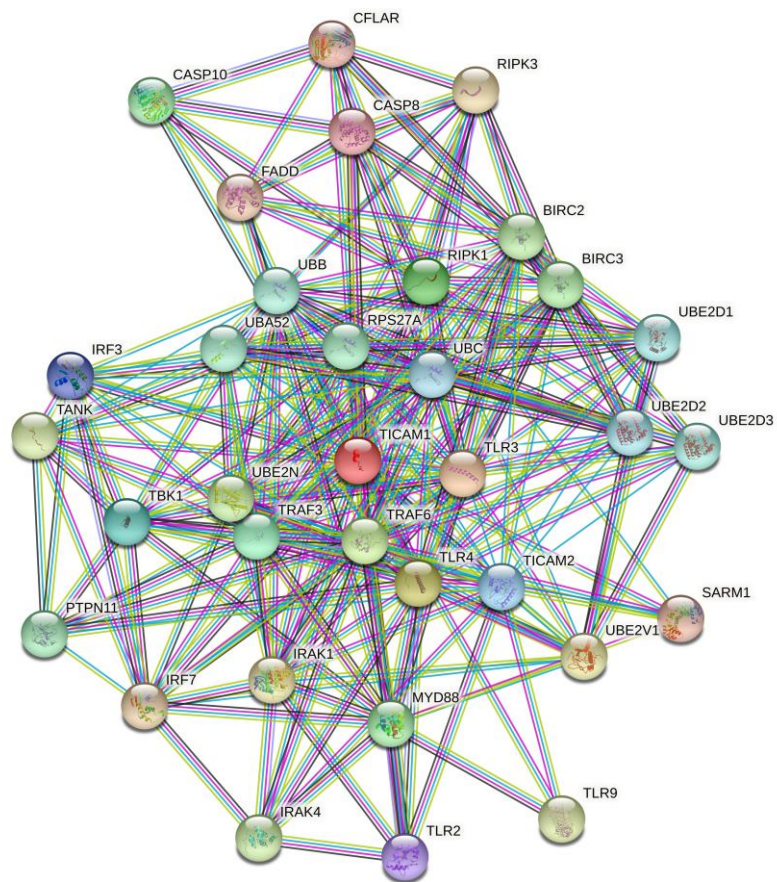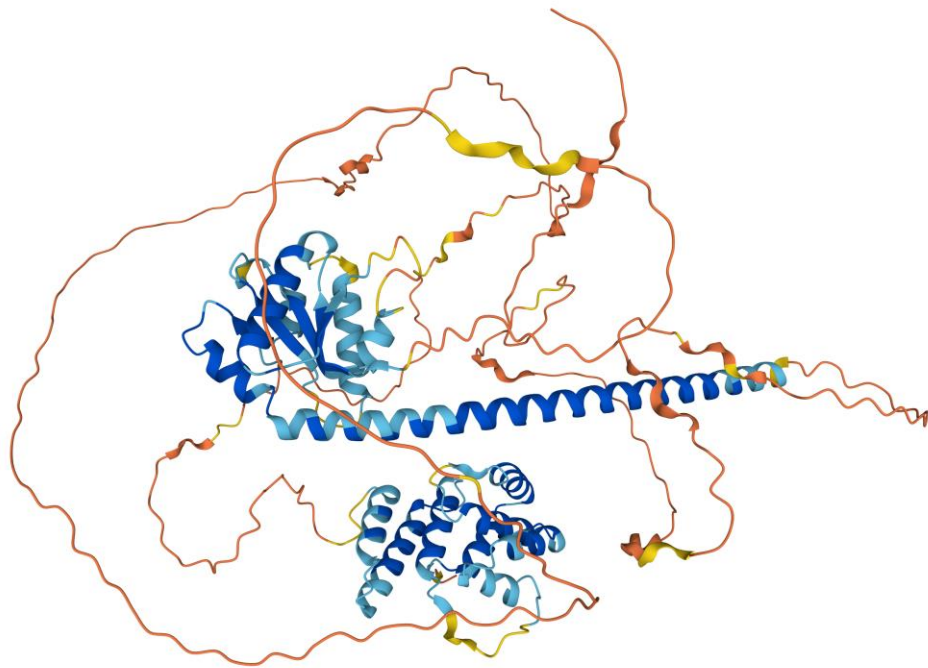

```

>sp|Q13546|RIPK1_HUMAN Receptor-interacting serine/threonine-protein kinase 1 OS=Homo
sapiens OX=9606 GN=RIPK1 PE=1 SV=3
MQPDMSLNVIKMKSSDFLESAELDSGGFGKVS LCFHRTQGLMIMKTVYKGPNCIEHNEALLEEAKMMNRLRHSRVVKLLGVIIIE
GKYS LVM EYMEKGNLMHVLKAEMSTPLSVKGRIILEIIEGMCYLHGKGV I HKDLKPENILVDNDFHIKIADLGLASF KMW SKLNN
EEHNELREVDGTAKKNGGTLYYMAPEHLNDVNAKPTKSDVYSFAVVLWAI FANKEPYENAICEQQ LIMCIKSGNRPD VDDITEY
CPREIISLMKLCWEANPEARPTFFPGIEEKFRFPYLSQLEESVEEDVKS LKKEYSNENAVVKRMQSLQLDCVAVPSSRSNSATEQP
GSLHSSQGLGMGPVEESWFAPSLEHPQEENEPSLQSKLQDEANYHLYGSRMDRQTKQQPRQNVAYNREEERRRRVSHDPFAQQRP
YENFQNTGKGTAYSSAASHGNAVHQPSGLTSQPQVLYQNNGLYSSHGFGTRPLDPGTAGPRVWYRPIPSHMPSLHNI PVPETNY
LGNTPTMPFSSLPPTDESIKYTIYNSTGIQIGAYNYMEIGGTSSSLDSTNTNFKEEPAAKYQAIFDNTTSLTDKHLDP IRENLG
KHWNKNCARKLGFTQSQIDEIDHDYERDGLKEKVYQMLQKWVMREGIKGATVGKLAQALHQCSRIDL LSSLIYVSQN

```

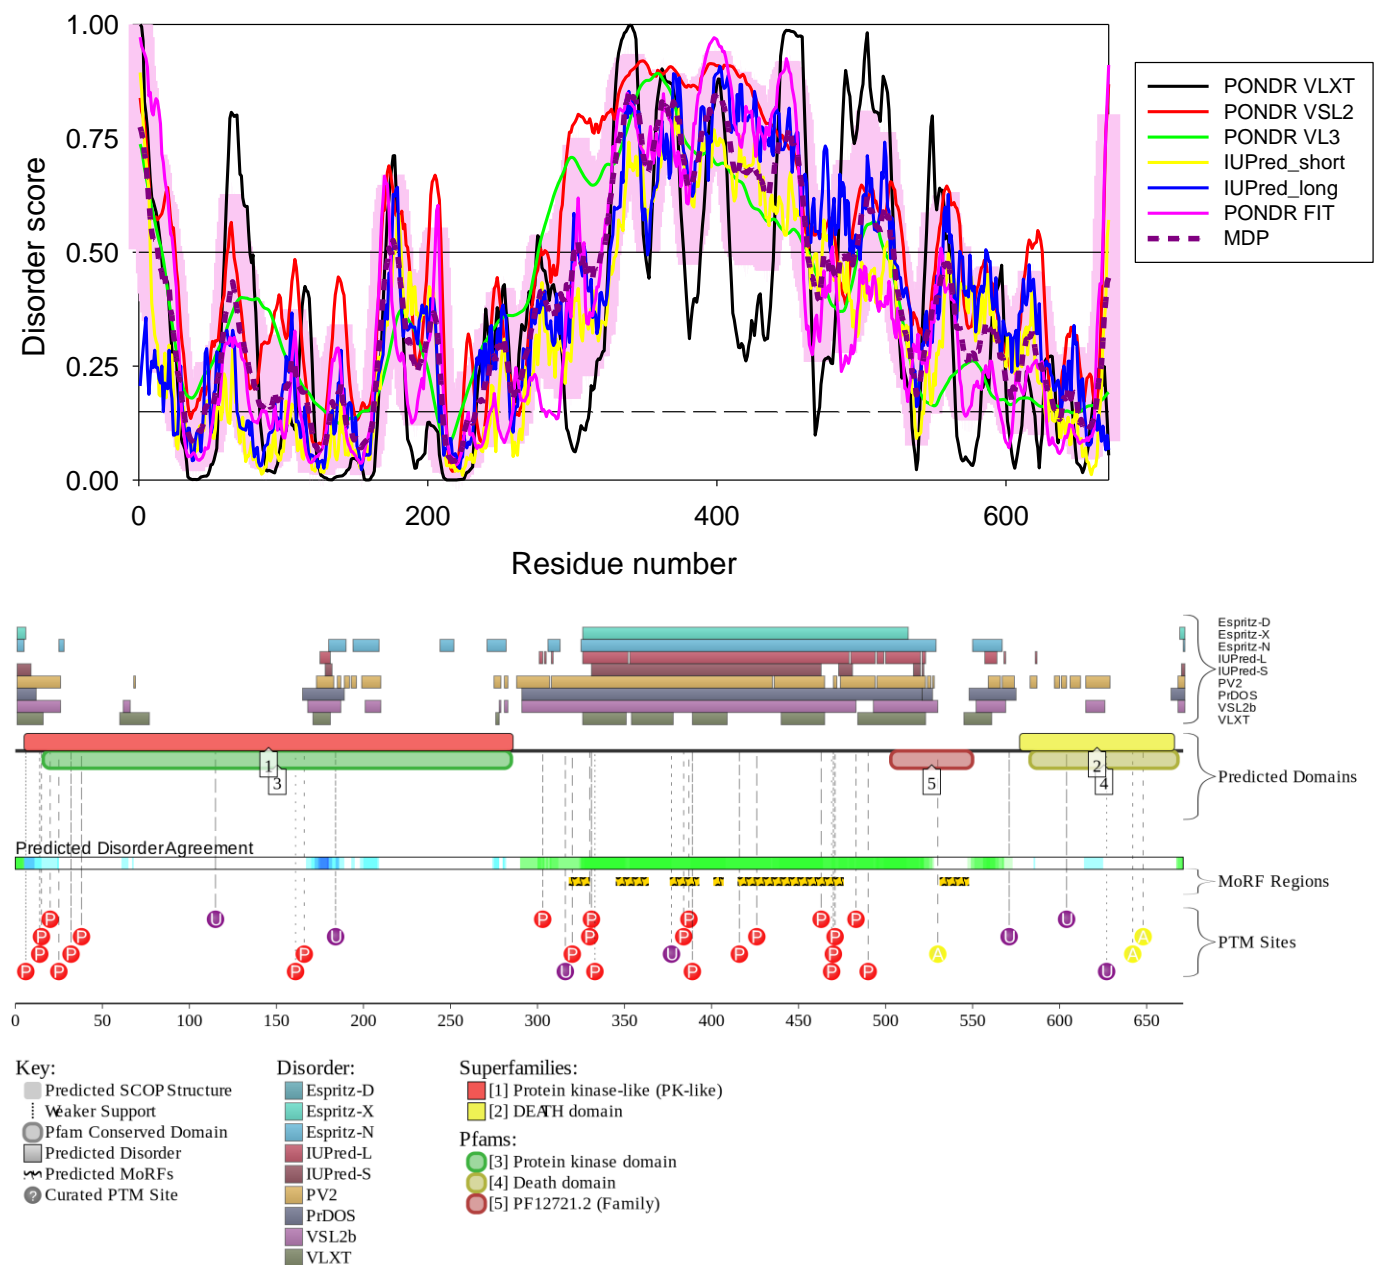



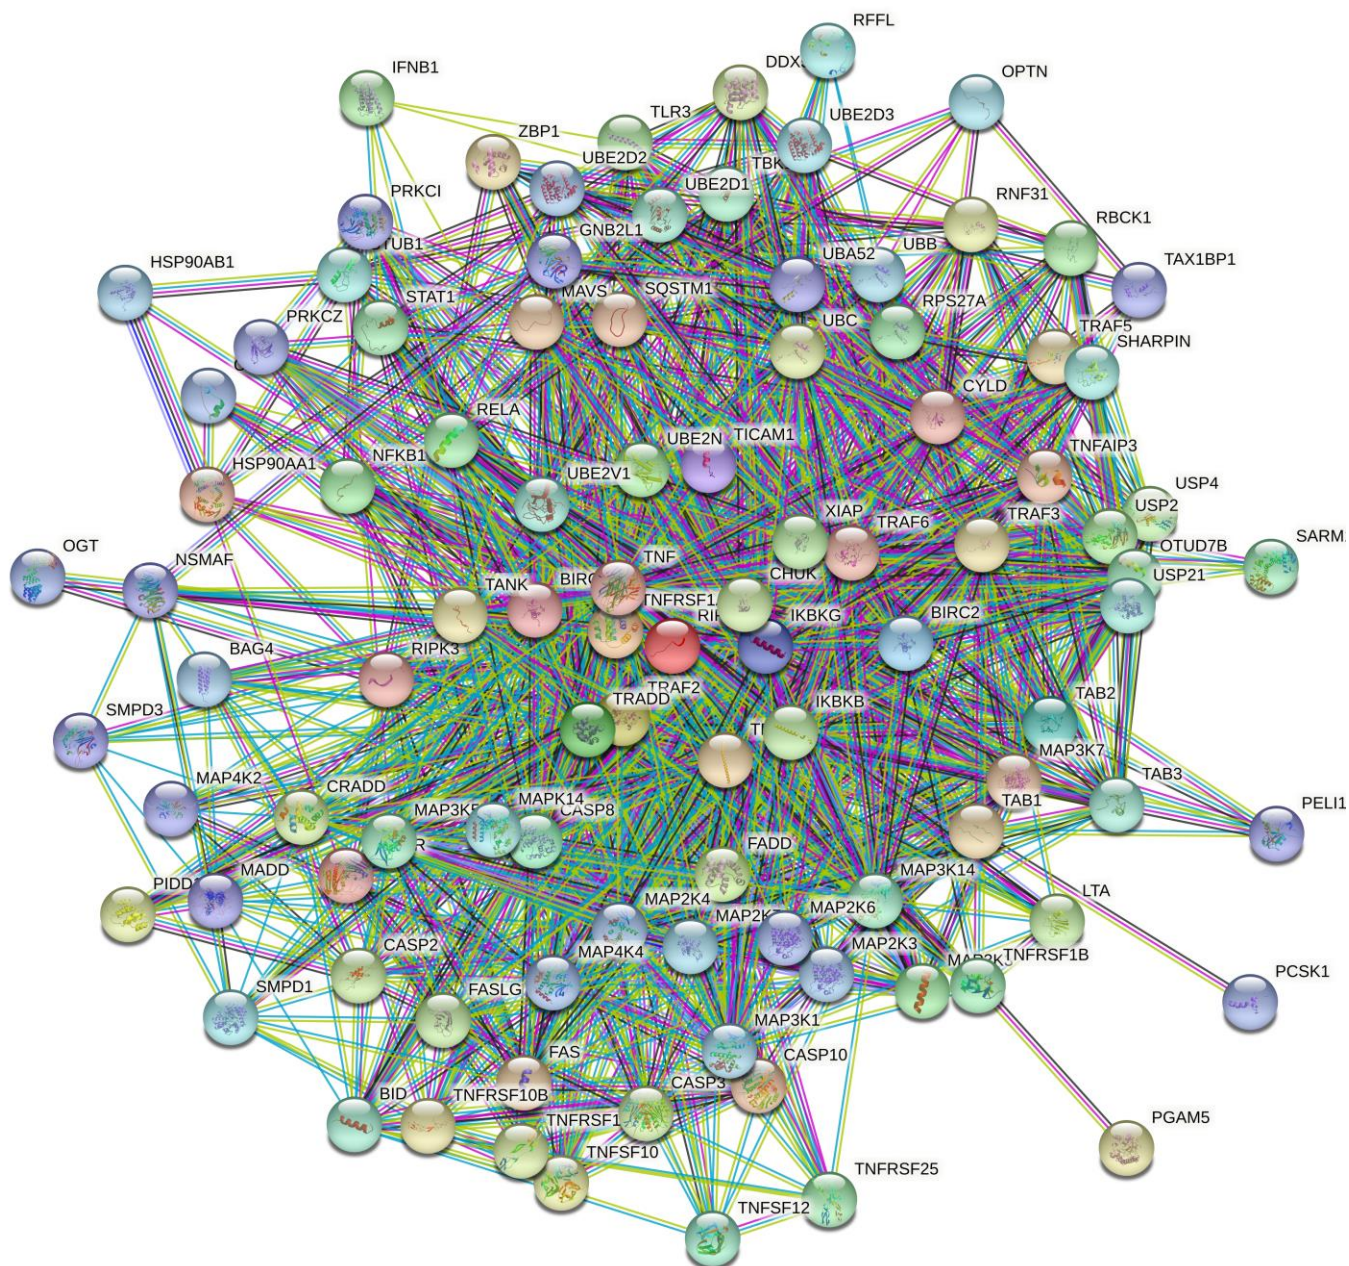



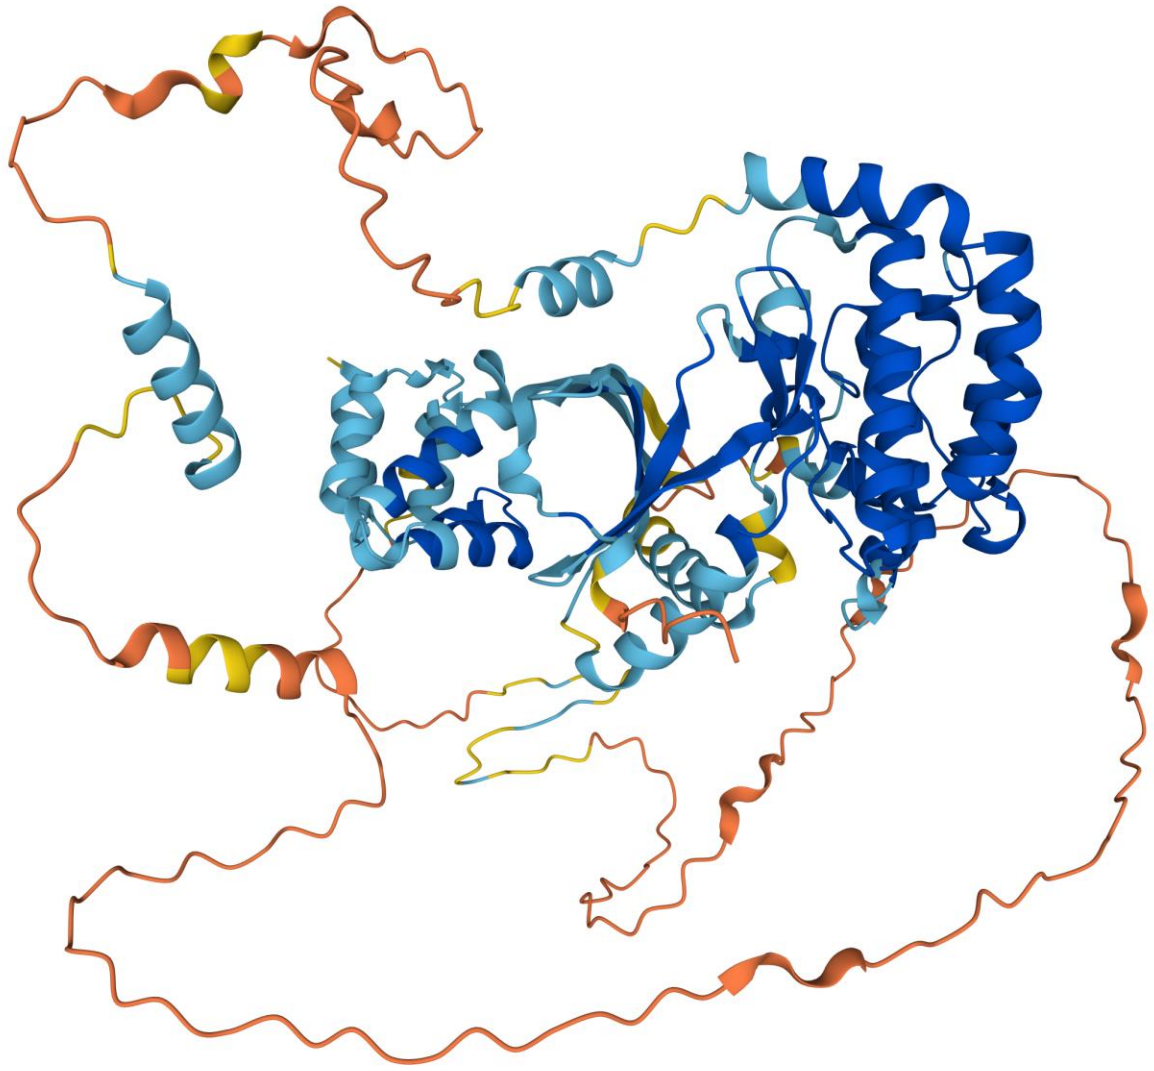

```

>sp|Q86XR7|TCAM2_HUMAN TIR domain-containing adapter molecule 2 OS=Homo sapiens
OX=9606 GN=TICAM2 PE=1 SV=1
MGIGKSKINSCPLSLSWGKRHSVDTSPTYHESDSKKSSEDLNVAEHSNTTEGPTGKQEGAQSVEEMFEEEEAEVFLKFVILH
AEDDTDEALRVQNLQDDFGIKPGIIFAEMPCGRQHLQNLDDAVNGSAWTILLTLENFLRDTWCNFFQFYTSLMNSVNRQHKYNSV
IPMRPLNNPLPRERTPFALQNTINALEEESRGFTQVERIFQESVYKTQQTIIWKETRNMVQRQFIA

```

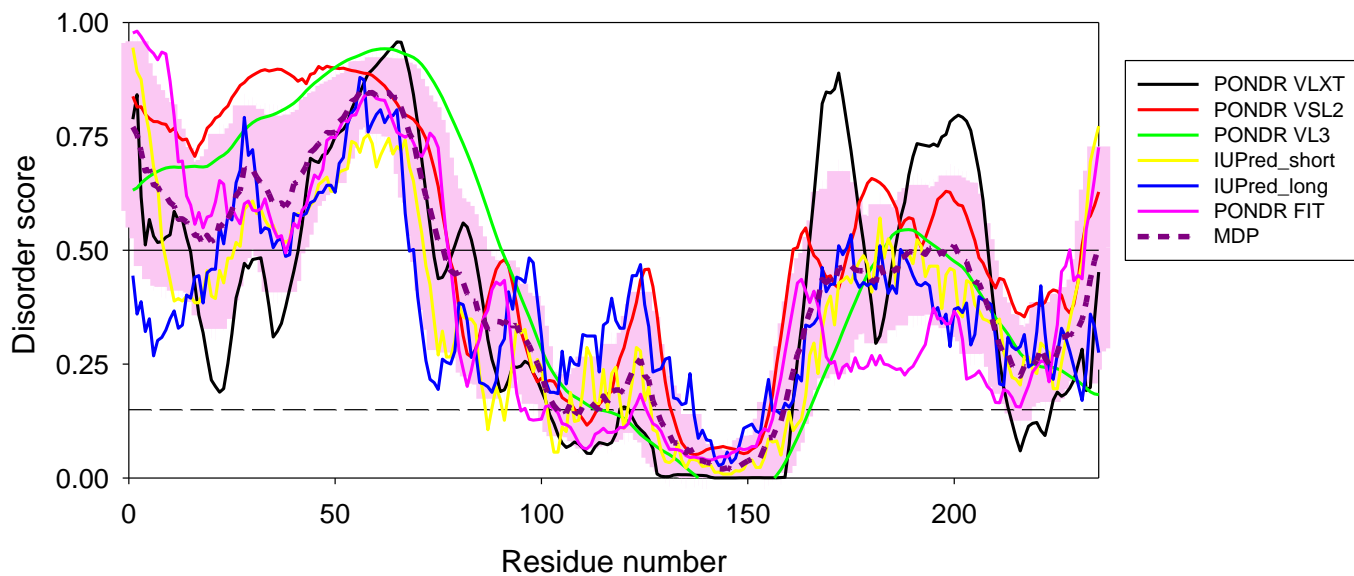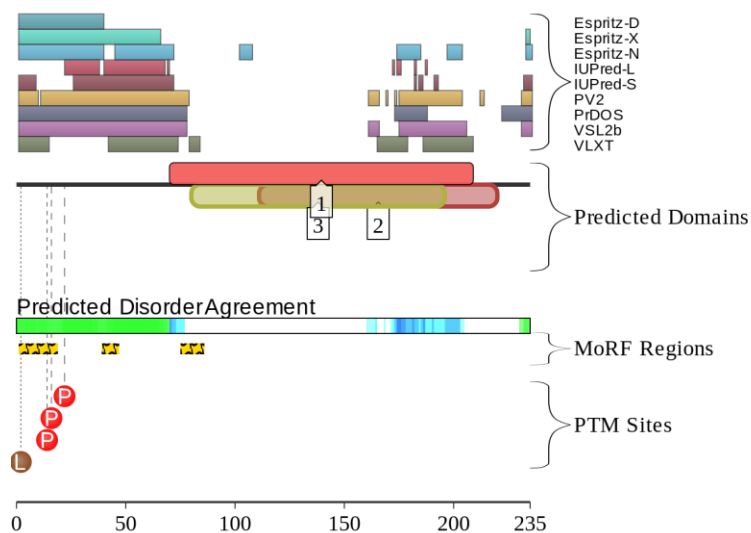

Key:

- Predicted SCOP Structure
- Weaker Support
- Pfam Conserved Domain
- Predicted Disorder
- Predicted MoRFs
- Curated PTM Site

Disorder:

- Espritz-D
- Espritz-X
- Espritz-N
- IUPred-L
- IUPred-S
- PV2
- PrDOS
- VSL2b
- VLXT

Superfamilies:

- [1] Toll/Interleukin receptor TIR domain

Pfams:

- [2] PB011868 (Pfam-B)
- [3] TIR domain

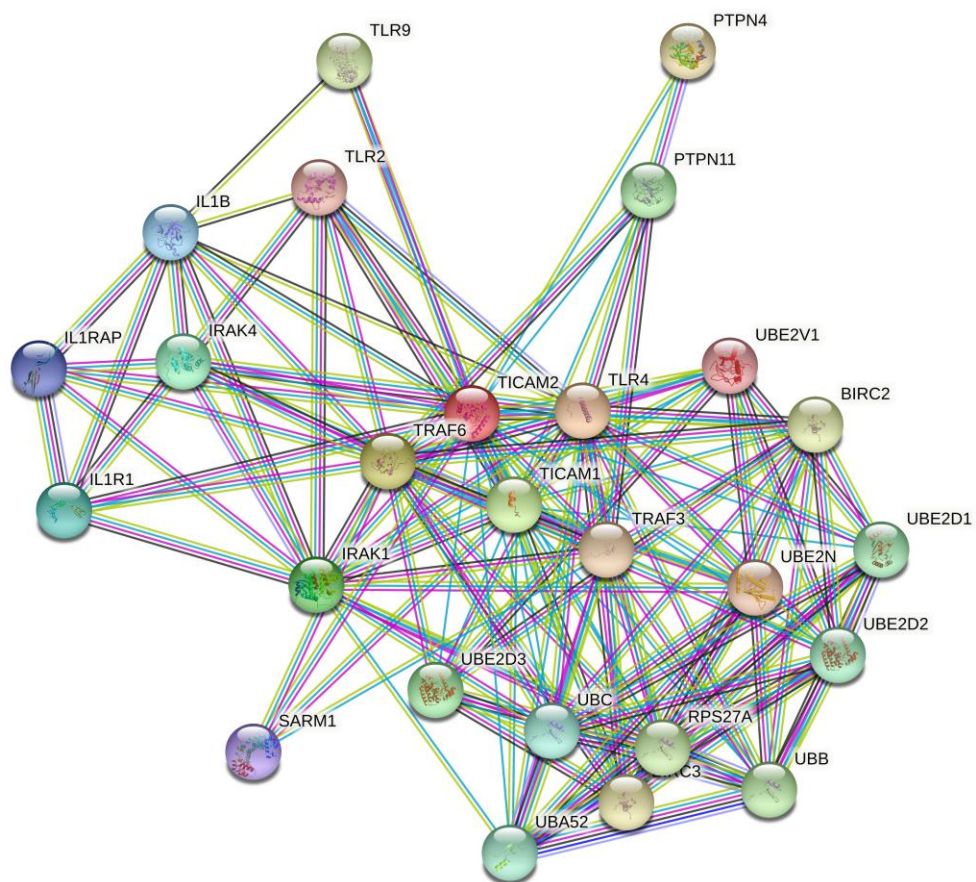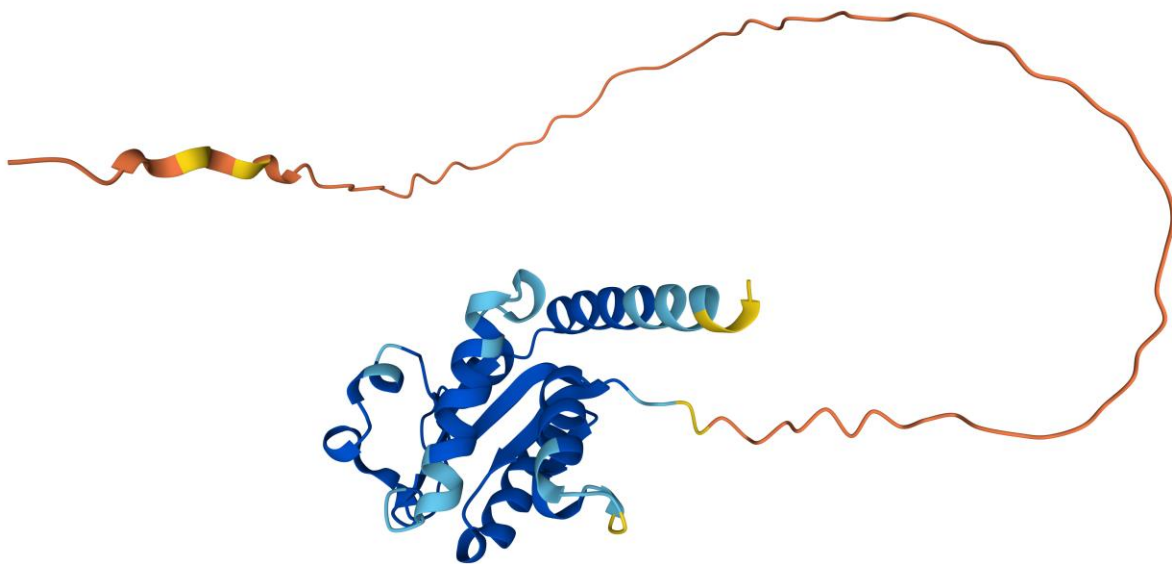



```
>sp|P01562|IFNA1_HUMAN Interferon alpha-1/13 OS=Homo sapiens OX=9606 GN=IFNA1 PE=1
SV=1
MASPFALLMVLVVLSCKSSCSLGCGLPETHSLDNRRTLMLLAQMSRISPSSCLMDRHDGFGFPQEEFDGNQFQKAPASVLHELIO
QIFNLFTTKDSSAAWDEDLLDKFCTELYQQLNLEACVMQEERVGETPLMNADSIKAVKKYFRRITLYLTEKKYSPCAWEVVRAE
IMRSLSLSTNLQERLRKE
```

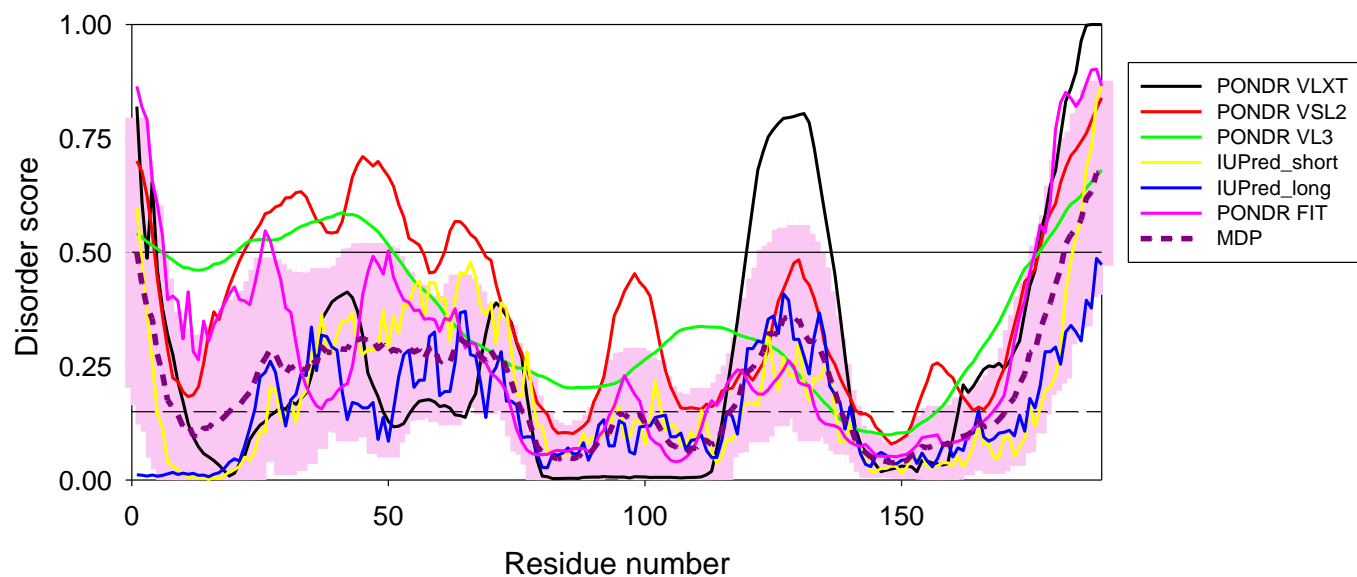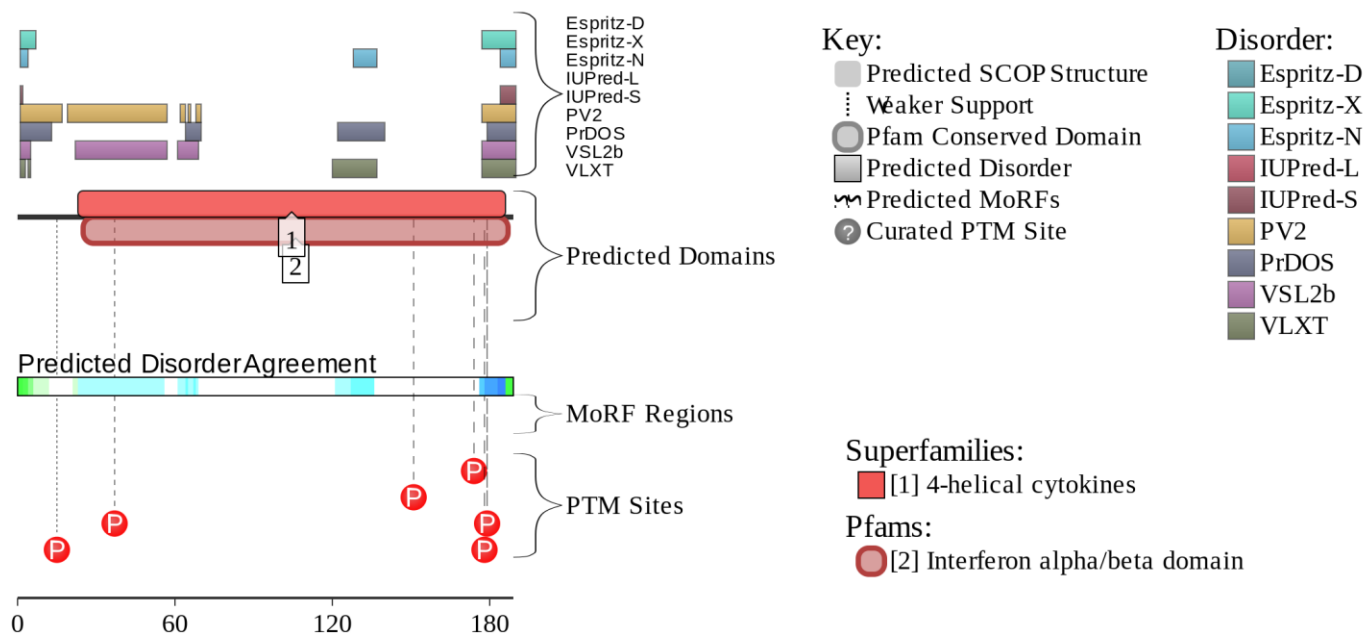

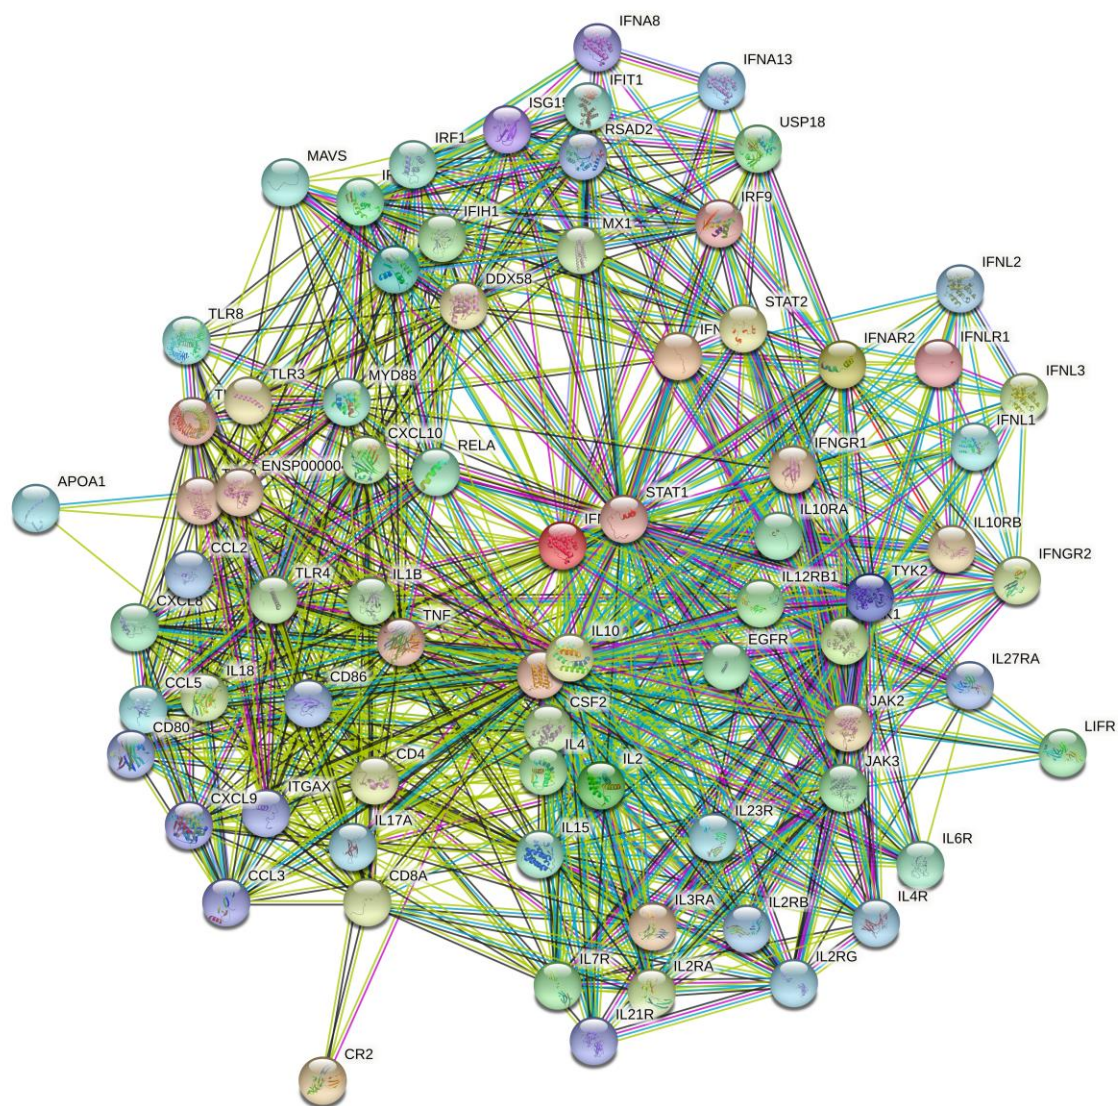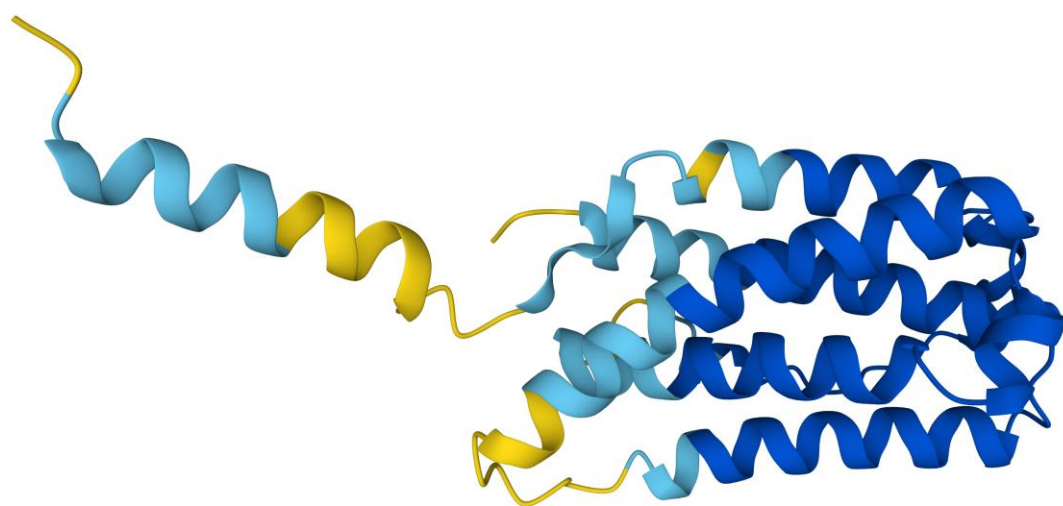

```
>sp|P01574|IFNB_HUMAN Interferon beta OS=Homo sapiens OX=9606 GN=IFNB1 PE=1 SV=1
MTNKCLLQIALLLCFSTTALSMSYNLLGFLQRSSNFQCQKLLWQLNGRLEYCLKDRMNFDIPEEIKQLQQFQKEDAALTIYEMLQ
NIFAIFRQDSSSTGWNETIVENLLANVYHQINHLKTVLEEKLEKEDFTRGKLMSSLHLKRYYGRIHLHYLKAKEYSHCAWTIVRVE
ILRNFYFINRLTGylRN
```

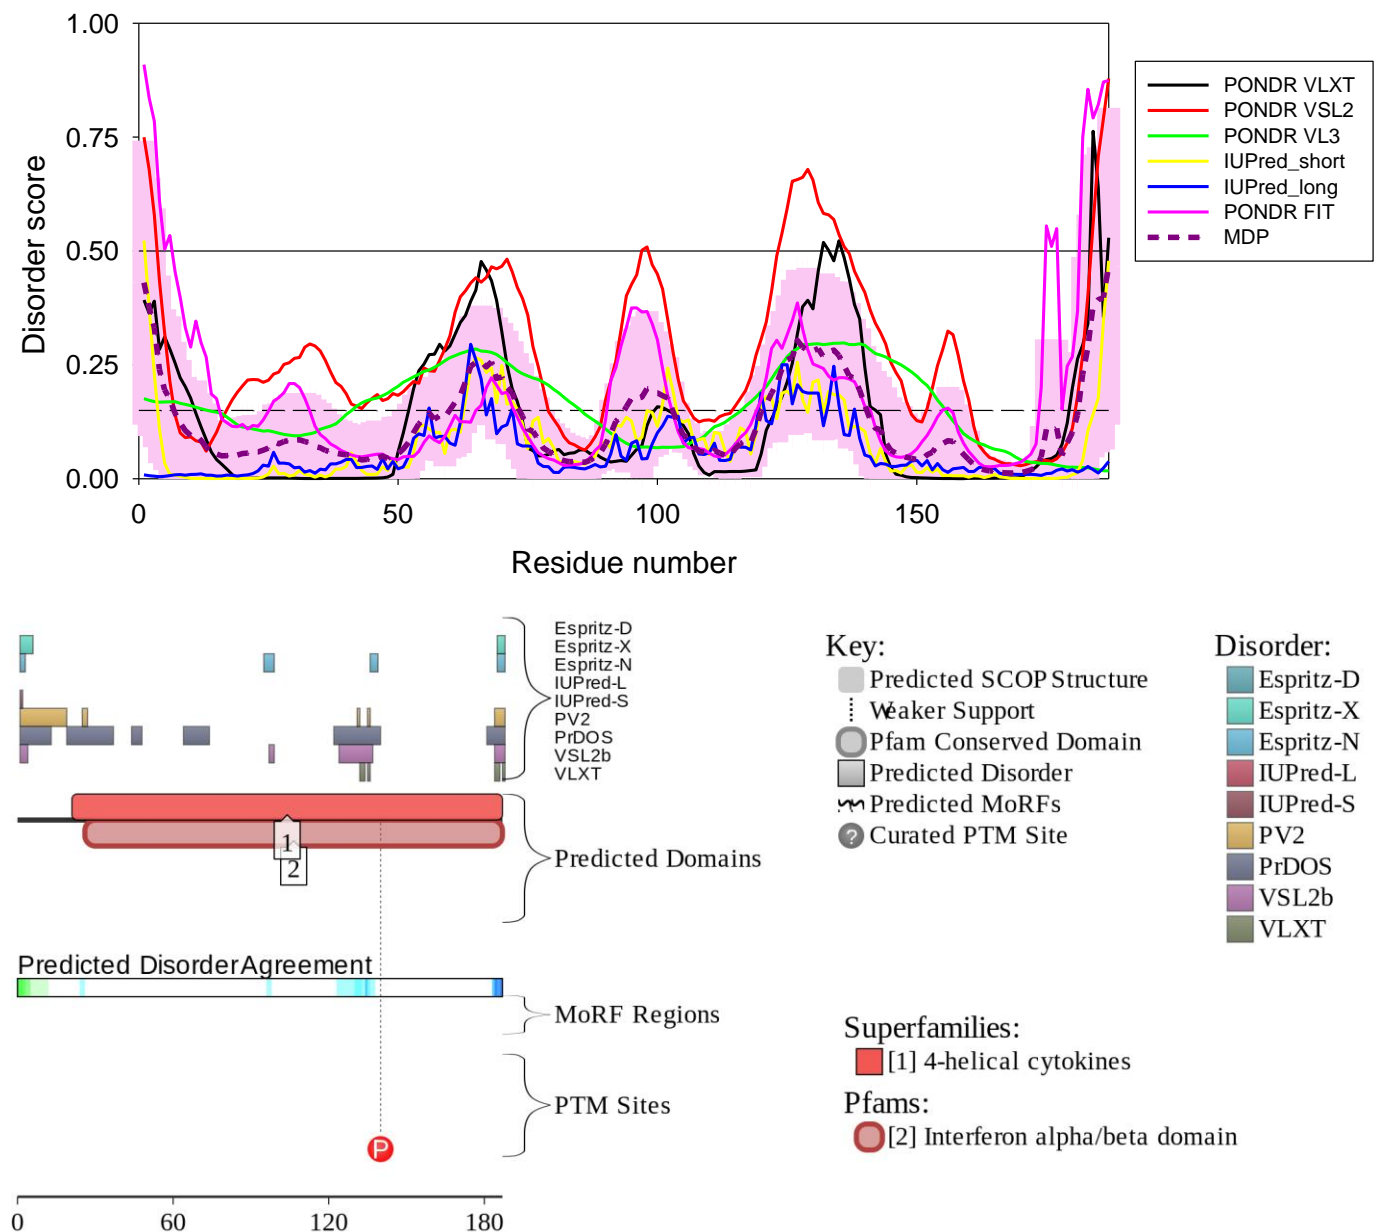



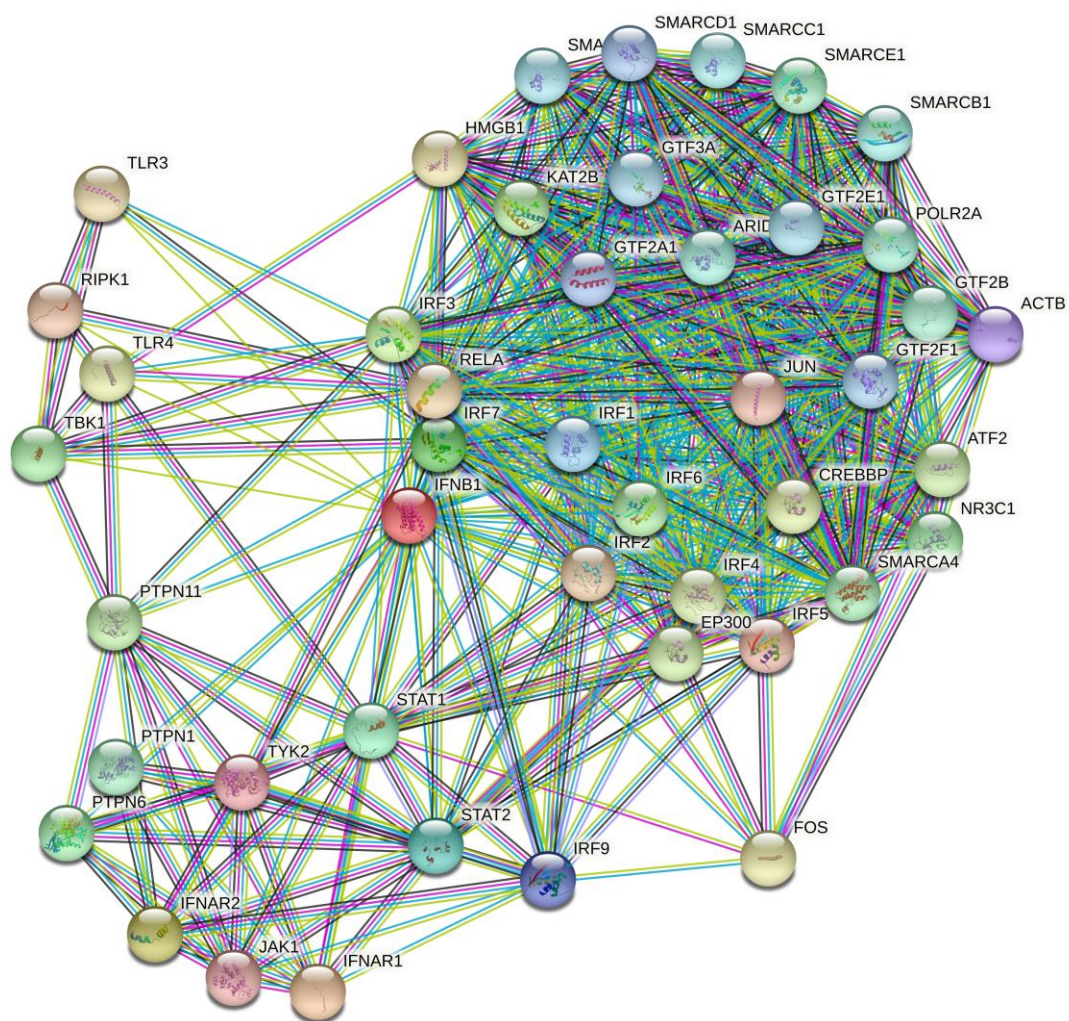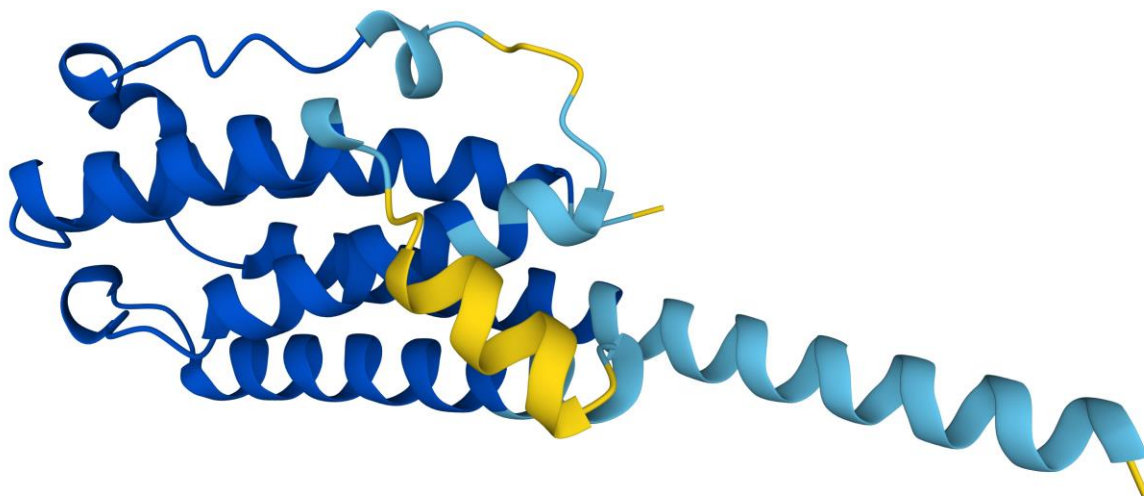

```
>sp|P05014|IFNA4_HUMAN Interferon alpha-4 OS=Homo sapiens OX=9606 GN=IFNA4 PE=1 SV=2
MALSFSLMAVLVLSYKSLGCDLPQTHSLGNRRALILLAQMGRISHFSLKDRHDFGFPPEEEFDGHQFQKAQAISVLHEMIQ
QTFNLFSTEDSSAAWEQSLLEKFSTELYQQLNDLEACVIEVGVVEETPLMNEDSILAVRKYFQRITLYLTEKKYSPCAWEVVRAE
IMRSLSFSTNLQKRLRRKD
```

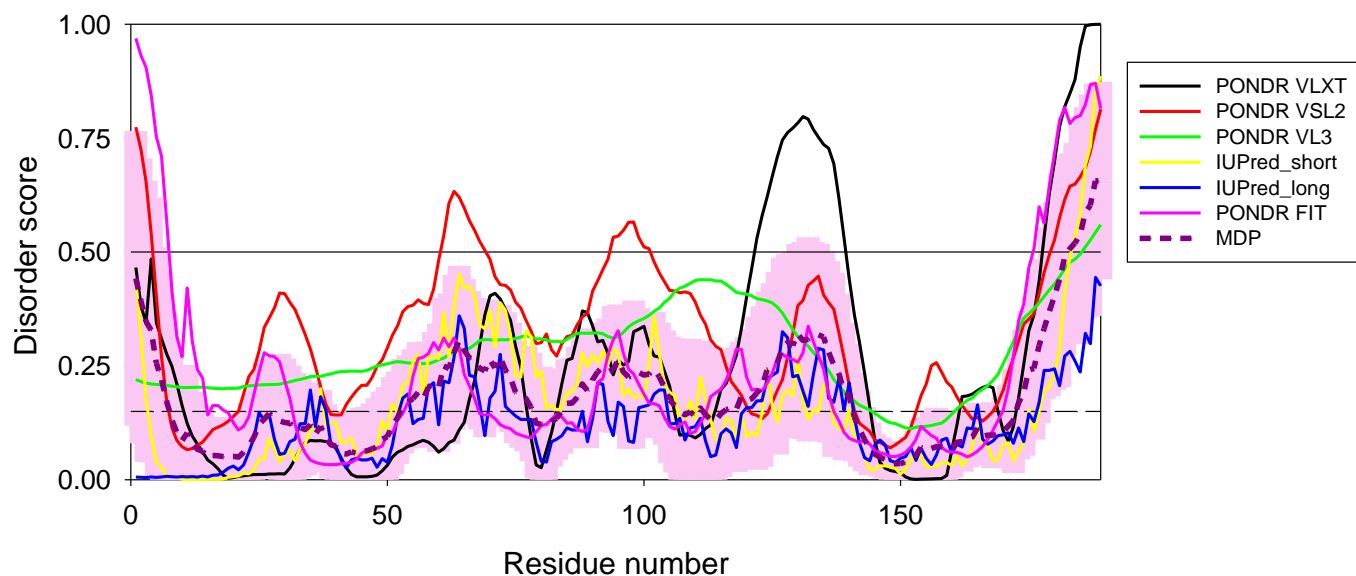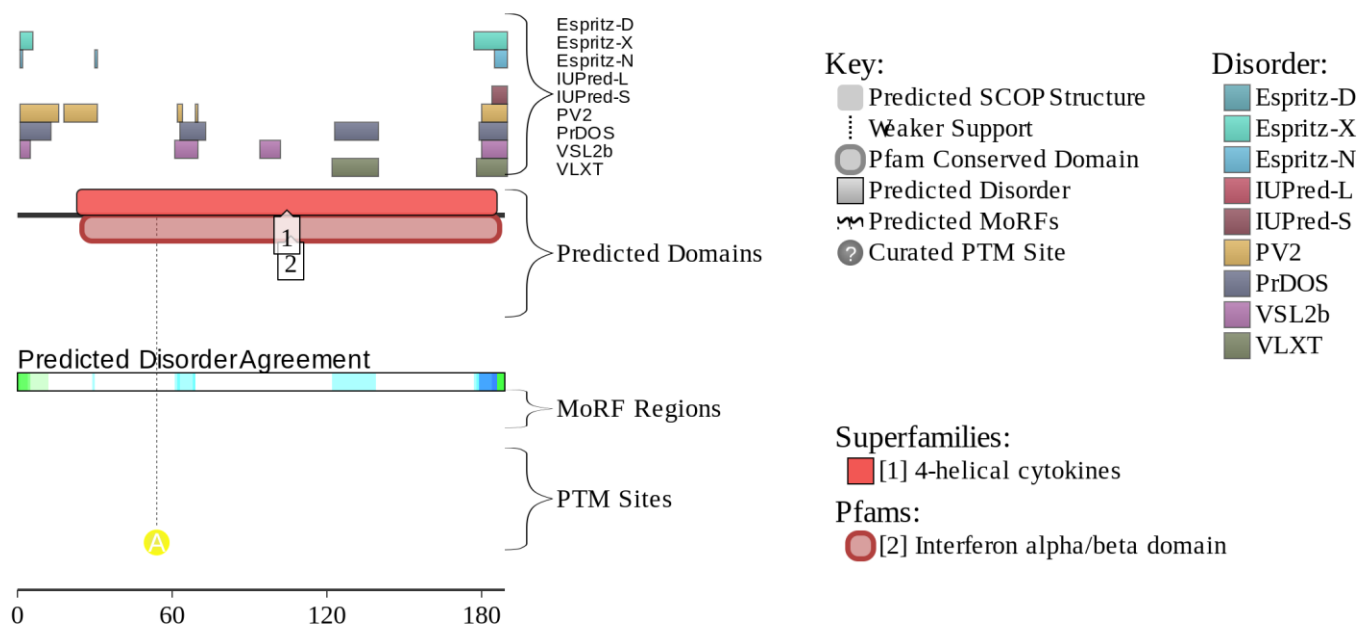



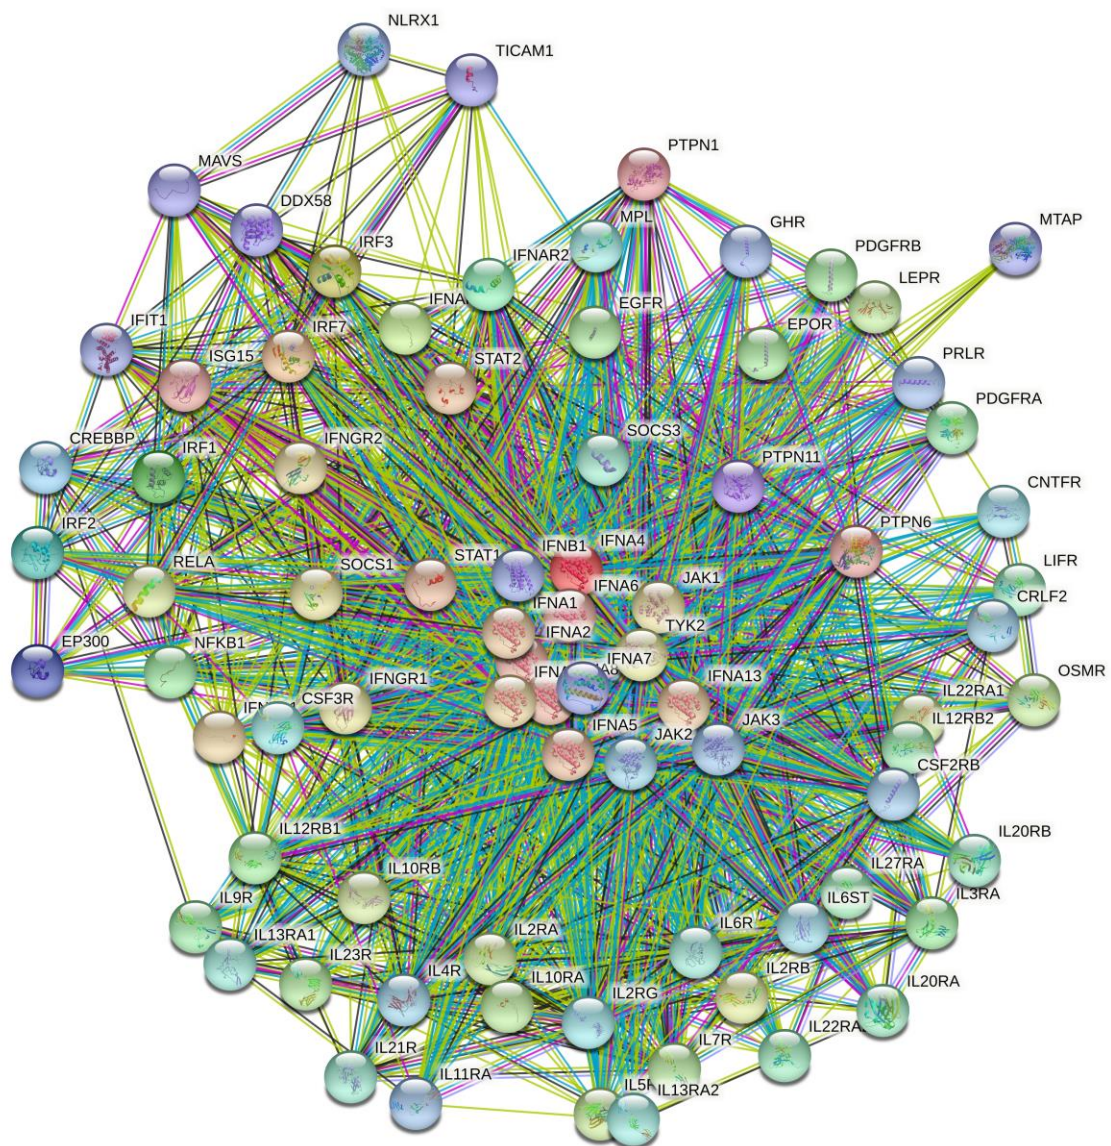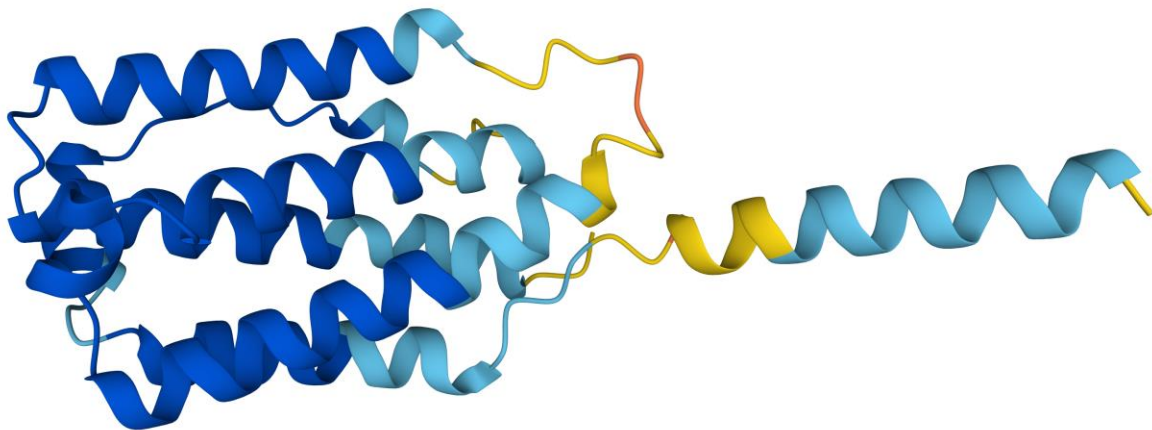



```
>sp|P08571|CD14_HUMAN Monocyte differentiation antigen CD14 OS=Homo sapiens OX=9606
GN=CD14 PE=1 SV=2
MERASCLLLLLLPLVHVSATTPEPCELDDDEFRCVCNCFSEPPQPDWSEAFQCVS AVEVEIHAGGLNLEPFLKRVDADADPRQYADT
VKALRVRLTVGAAQVPAQLLVGALRVLAYSRKELTLEDLKITGTMPPPLPLEATGLALSSLRLRNVSATGRSWLAELQQWLKP
GLKVLISIAQAHSPAFCSEQVRAFPALTSLDLSDNPGGLGERGLMAALCPHKFFAIQNALARNRNTGMETPTGVCAALAAAGVQPHSLD
LSHNSLRATVNPSPAPRCMWSSALNSLNLSFAGLEQVPKGLPAKLRVLDLSCNRLNRAPQPDDELPEVDNLTLDGNPFLVPGTALPH
EGSMNSGVVPACARSTLSVGVSGTLVLLQGARGFA
```

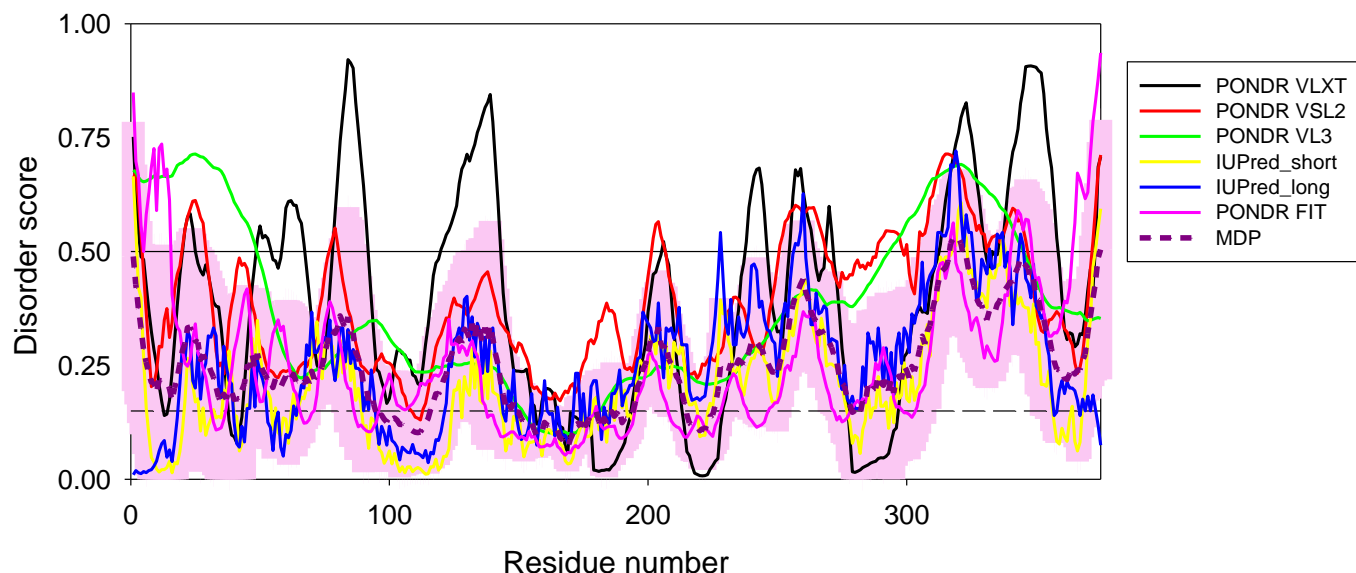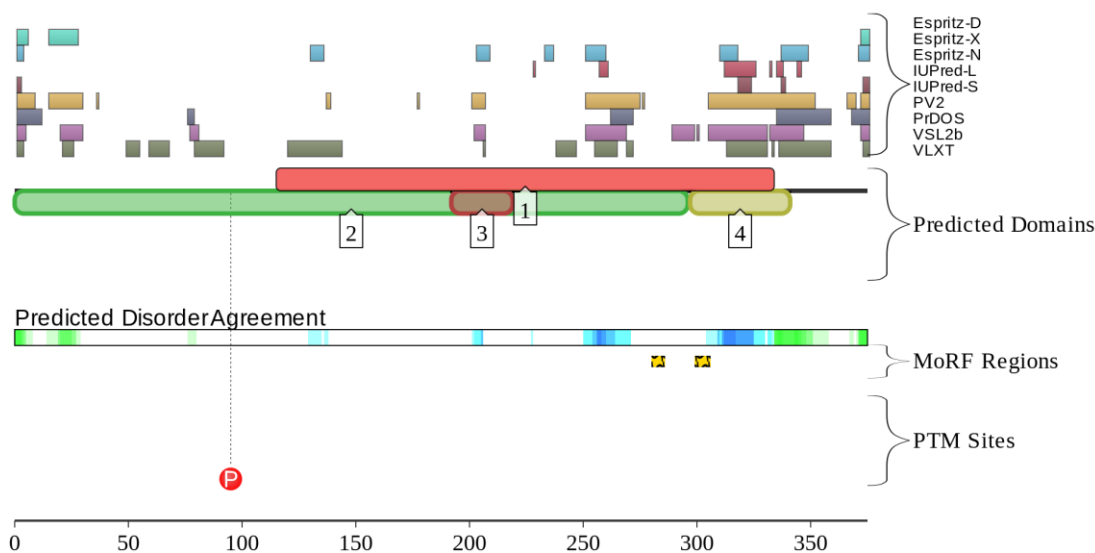

Key:

- Predicted SCOP Structure
- Weaker Support
- Pfam Conserved Domain
- Predicted Disorder
- Predicted MoRFs
- Curated PTM Site

Disorder:

- Espritz-D
- Espritz-X
- Espritz-N
- IUPred-L
- IUPred-S
- PV2
- PrDOS
- VSL2b
- VLXT

Superfamilies:

- [1] L domain-like

Pfams:

- [2] PB002723 (Pfam-B)
- [3] Leucine Rich repeat
- [4] Leucine Rich Repeat

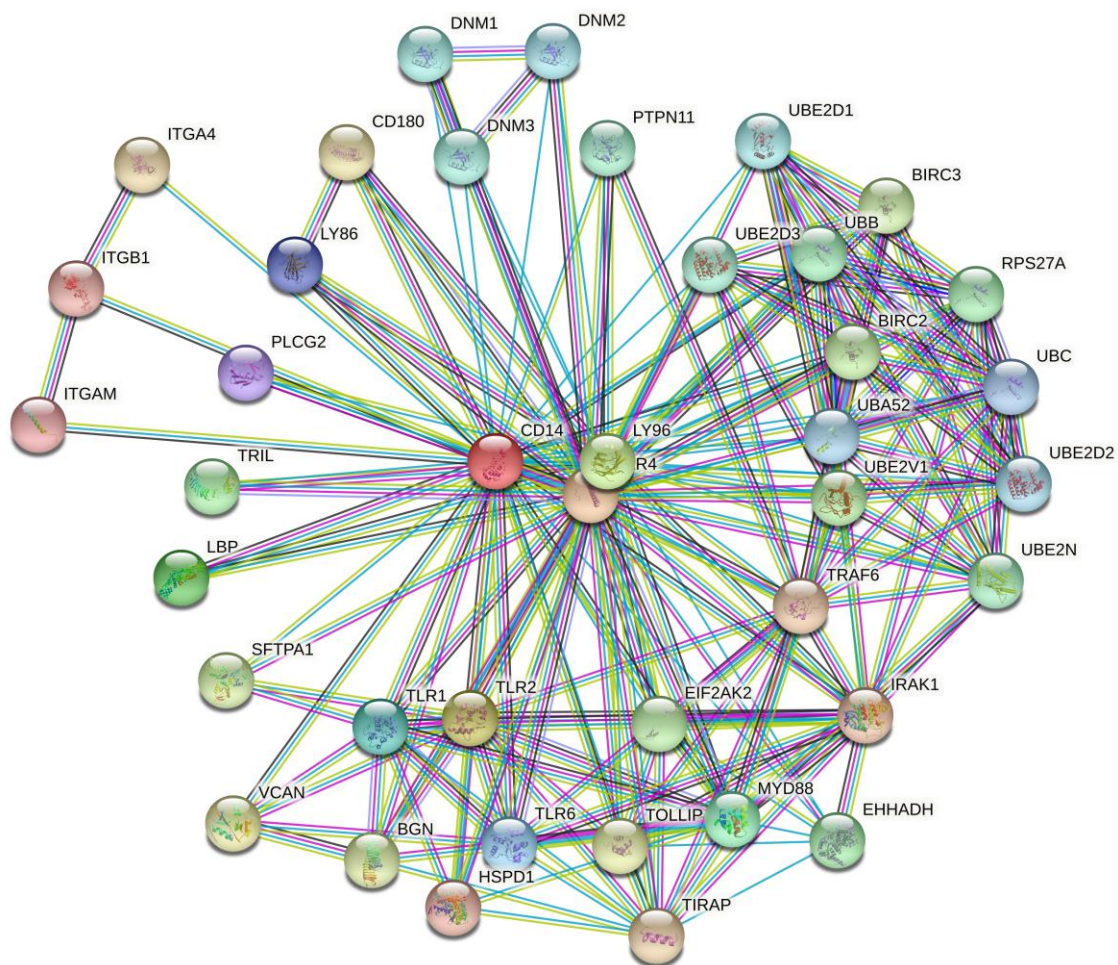

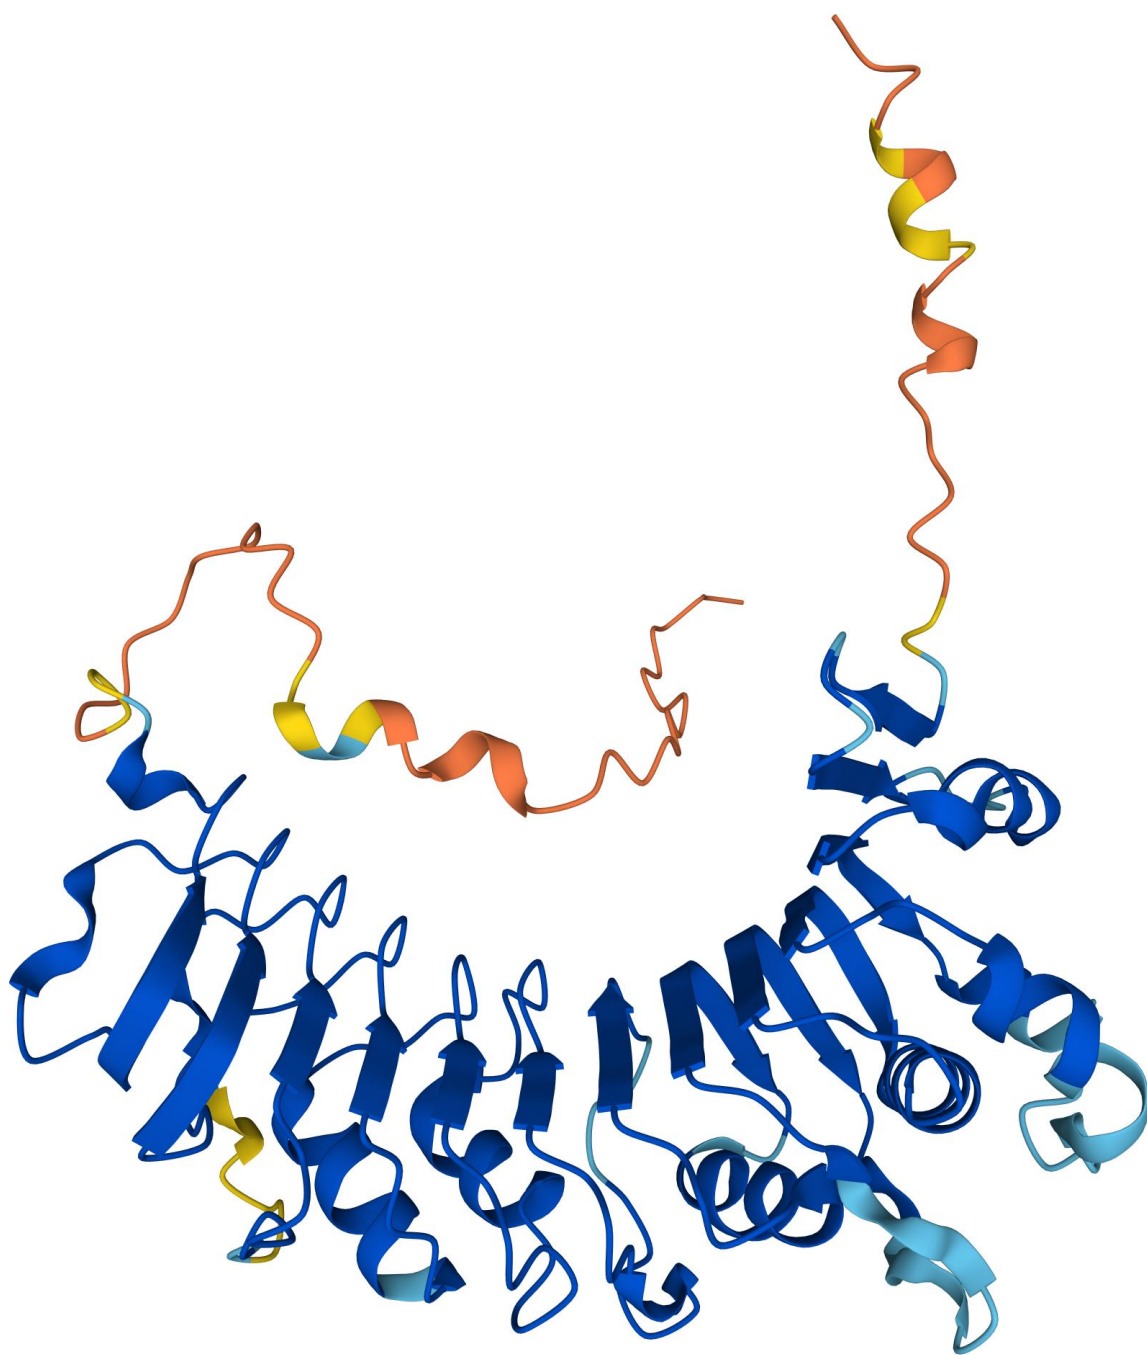



>sp|Q9Y6Y9|LY96\_HUMAN Lymphocyte antigen 96 OS=Homo sapiens OX=9606 GN=LY96 PE=1 SV=2  
MLPFLFFSTLFFSSIFTEAQKQYWVCNSSDASISYTYCDKMQYPISINVNPCIELKRSKGLLHIFYIPRRDLKQLYFNLYITVNTM  
NLPKRKEVICRGSDDDYSFCRALKGETVNTTISFSFKGIKFSKGKYKCVVEAISGSPEEMLFCLEFVILHQPNSN

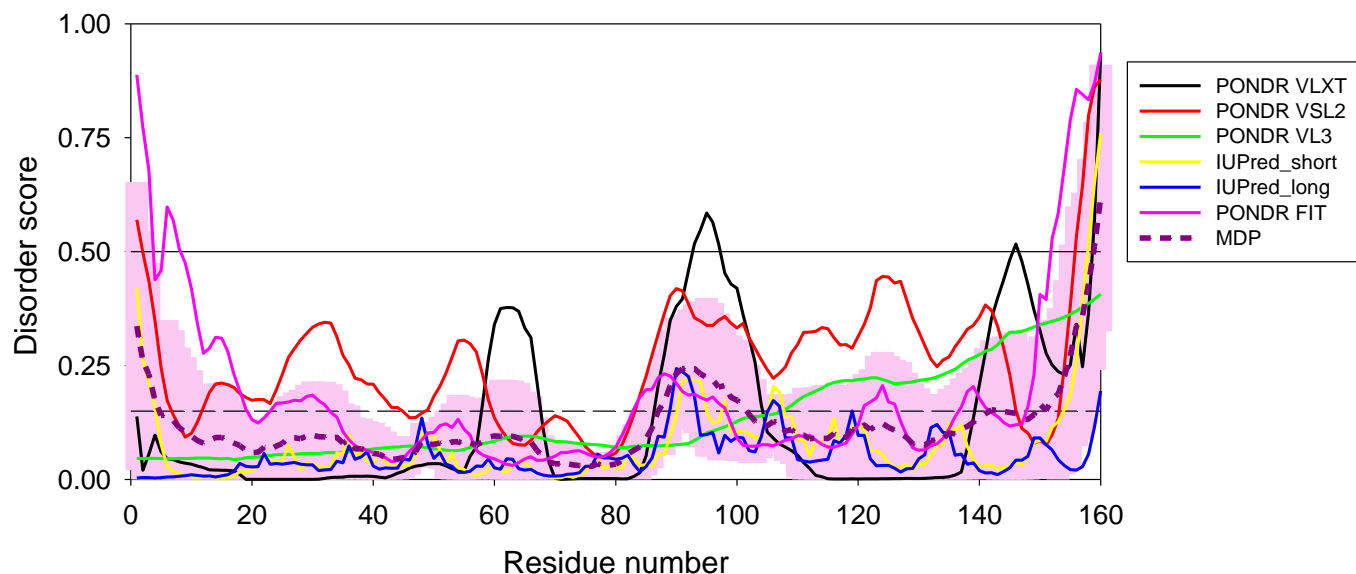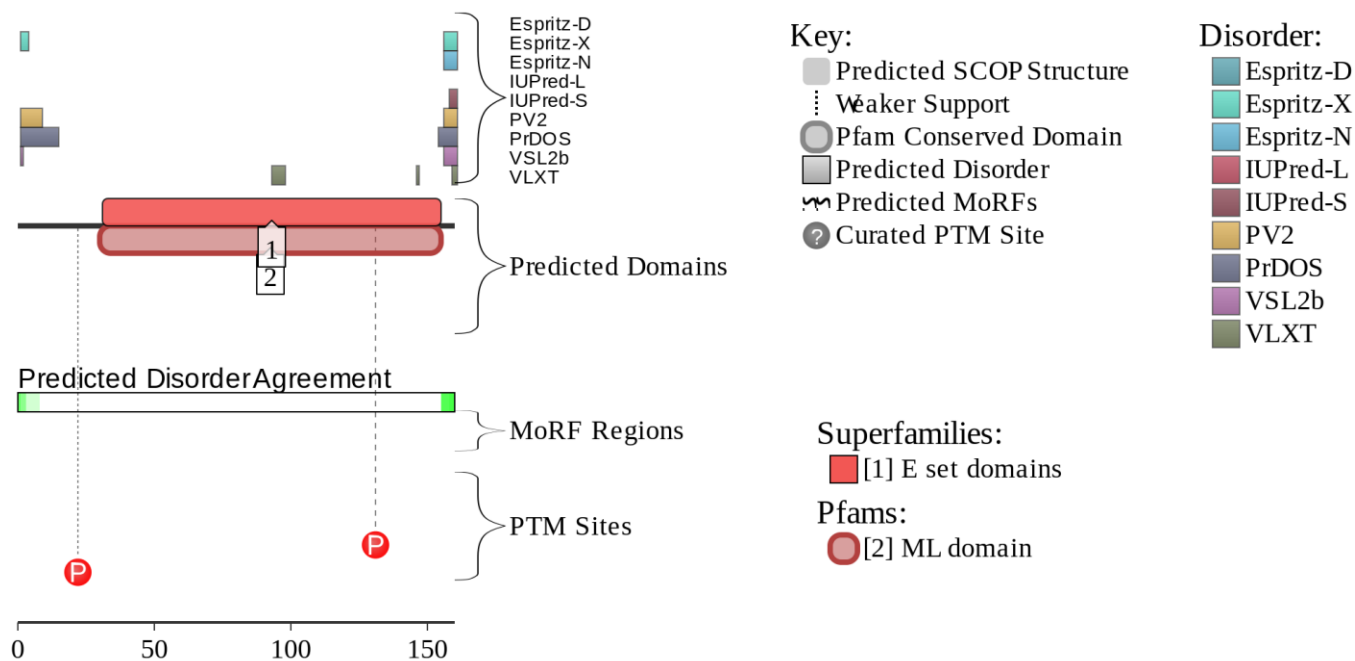

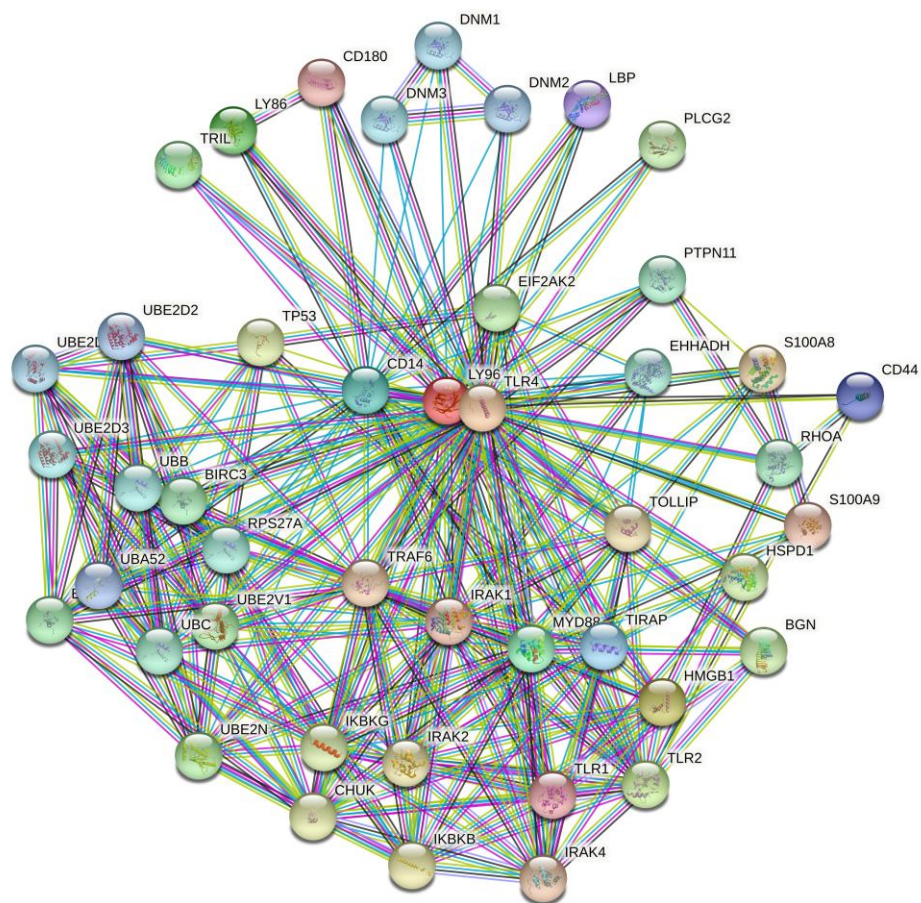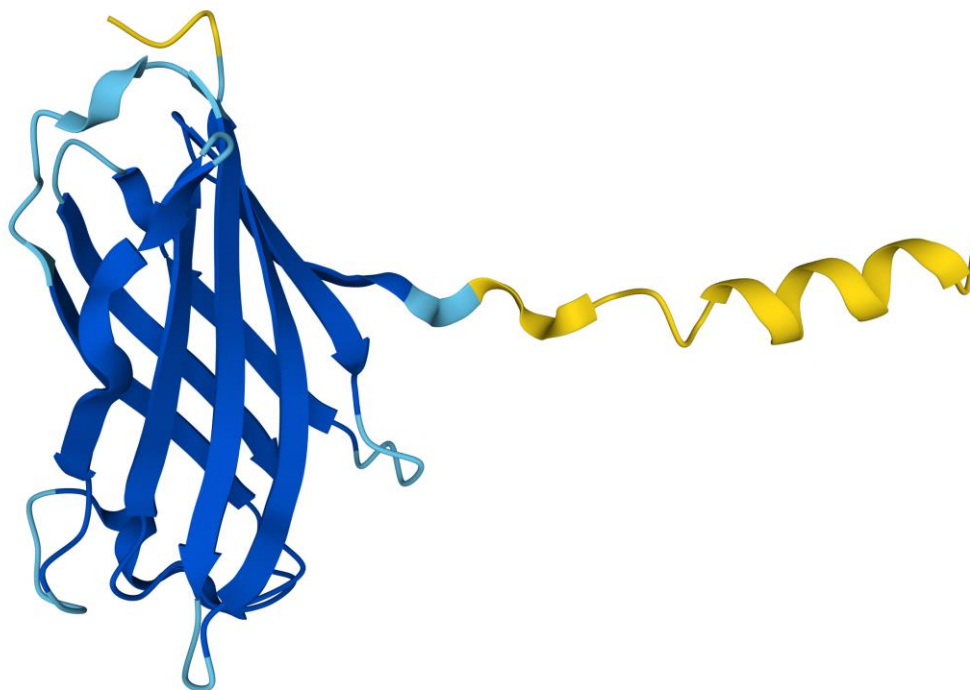

**Supplementary Table S1. Some physico-chemical and intrinsic disorder-related features of HCV proteins, human TLRs, and major players of the TLR-regulated downstream signaling pathways**

| Protein name<br>(UniProt ID)          | Protein function                                                                                                                              | Length | PPIDR | ADS    | Number of<br>IDRs | Longest IDR            | MoRFs                                                                                           | Number of<br>interactors |
|---------------------------------------|-----------------------------------------------------------------------------------------------------------------------------------------------|--------|-------|--------|-------------------|------------------------|-------------------------------------------------------------------------------------------------|--------------------------|
| <b>HCV proteome</b>                   |                                                                                                                                               |        |       |        |                   |                        |                                                                                                 |                          |
| HCV genome<br>polyprotein<br>(P27958) | Genome polyprotein, processed<br>to individual viral proteins at<br>maturation                                                                | 3011   | 19.46 | 0.3224 | 40                | 2295-2417<br>(123)     | 1-52 (52)<br>76-94 (19)<br>2174-2213 (40)<br>2222-2234 (13)<br>2290-2301 (12)<br>2330-2412 (83) | 259<br>(IntAct)          |
| Core (2-177)                          | Mature core protein; packages<br>viral RNA                                                                                                    | 176    | 68.18 | 0.6242 | 3                 | 1-93 (93)              | 1-51 (51)<br>75-95 (21)                                                                         | 112 <sup>a</sup>         |
| E1 (192-383)                          | Envelope glycoprotein E1;<br>mediates virus attachment to<br>the host cell                                                                    | 192    | 6.77  | 0.2159 | 3                 | 1-7 (7)                | N/P                                                                                             | 10 <sup>a</sup>          |
| E2 (384-746)                          | Envelope glycoprotein E2;<br>mediates virus attachment to<br>the host cell                                                                    | 363    | 9.37  | 0.2593 | 6                 | 270-281 (12)           | N/P                                                                                             | 31 <sup>a</sup>          |
| p7 (747-809)                          | Viroporin; ion channel protein<br>that acting in the assembly,<br>envelopment and secretion of<br>viral particles                             | 63     | 12.70 | 0.1848 | 2                 | 1-4 (4)<br>60-63 (4)   | N/P                                                                                             | 2 (UniProt)              |
| NS2 (810-1026)                        | Cysteine protease; required for<br>the proteolytic auto-cleavage                                                                              | 217    | 4.61  | 0.1579 | 2                 | 1-5 (5)<br>213-217 (5) | N/P                                                                                             | 31 <sup>a</sup>          |
| NS3 (1027-1657)                       | Serine protease/ helicase with<br>three enzymatic activities:<br>serine protease with a<br>chymotrypsin-like fold, NTPase<br>and RNA helicase | 631    | 22.03 | 0.3442 | 16                | 109-142 (34)           | N/P                                                                                             | 242 <sup>a</sup>         |
| NS4A (1658-<br>1711)                  | Non-structural protein 4A; non-<br>covalent peptide cofactor of<br>NS3 serine protease                                                        | 54     | 18.52 | 0.2504 | 2                 | 48-54 (7)              | N/P                                                                                             | 11 <sup>a</sup>          |



|                                                                             |                                                                                                                 |      |       |        |    |                              |                                                              |                         |
|-----------------------------------------------------------------------------|-----------------------------------------------------------------------------------------------------------------|------|-------|--------|----|------------------------------|--------------------------------------------------------------|-------------------------|
| NS4B (1712-1972)                                                            | Non-structural protein 4B; induces membrane alterations serving as a scaffold for the virus replication complex | 261  | 9.20  | 0.2621 | 4  | 219-228 (10)                 | N/P                                                          | 16 <sup>a</sup>         |
| NS5A (1973-2420)                                                            | Non-structural protein 5A; indispensable for viral replication and assembly                                     | 448  | 47.99 | 0.5411 | 6  | 323-448 (126)                | 202-241 (40)<br>250-262 (13)<br>318-329 (12)<br>358-448 (91) | 139 <sup>a</sup>        |
| NS5B (2421-3011)                                                            | RNA-directed RNA polymerase; performs primer-template recognition and RNA synthesis during viral replication    | 591  | 15.40 | 0.3120 | 11 | 85-102 (18)                  | N/P                                                          | 66 <sup>a</sup>         |
| <b>Human toll-like receptors</b>                                            |                                                                                                                 |      |       |        |    |                              |                                                              |                         |
| TLR1 (Q15399)                                                               | Toll-like receptor 1                                                                                            | 786  | 11.58 | 0.2904 | 11 | 384-422 (39)                 | N/P                                                          | 89 (0.400) <sup>b</sup> |
| TLR2 (O60603)                                                               | Toll-like receptor 2                                                                                            | 784  | 14.92 | 0.3074 | 13 | 19-57 (39)                   | N/P                                                          | 41 <sup>c</sup>         |
| TLR3 (O15455)                                                               | Toll-like receptor 3                                                                                            | 904  | 13.05 | 0.3050 | 12 | 152-209 (58)                 | N/P                                                          | 26                      |
| TLR4 (O00206)                                                               | Toll-like receptor 4                                                                                            | 839  | 9.30  | 0.2670 | 10 | 359-381 (23)                 | N/P                                                          | 84                      |
| TLR5 (O60602)                                                               | Toll-like receptor 5                                                                                            | 858  | 7.11  | 0.2458 | 7  | 462-476 (15)<br>836-850 (15) | N/P                                                          | 134 (0.400)             |
| TLR6 (Q9Y2C9)                                                               | Toll-like receptor 6                                                                                            | 796  | 7.16  | 0.2550 | 11 | 763-574 (12)                 | N/P                                                          | 132 (0.400)             |
| TLR7 (Q9NYK1)                                                               | Toll-like receptor 7                                                                                            | 1049 | 12.77 | 0.3055 | 11 | 593-625 (33)<br>666-698 (33) | N/P                                                          | 51 (0.700) <sup>d</sup> |
| TLR8 (Q9NR97)                                                               | Toll-like receptor 8                                                                                            | 1041 | 18.64 | 0.3135 | 13 | 707-765 (59)                 | N/P                                                          | 24 (0.700)              |
| TLR9 (Q9NR96)                                                               | Toll-like receptor 9                                                                                            | 1032 | 11.05 | 0.2857 | 14 | 62-86 (25)                   | N/P                                                          | 54 (0.700)              |
| TLR10 (Q9BXR5)                                                              | Toll-like receptor 10                                                                                           | 811  | 9.12  | 0.2587 | 9  | 793-811 (19)                 | N/P                                                          | 89 (0.400)              |
| <b>Members of the signaling pathways induced by the toll-like receptors</b> |                                                                                                                 |      |       |        |    |                              |                                                              |                         |
| MAL/ TIRAP (P58753)                                                         | MYD88 adapter-like; Toll/ interleukin-1 receptor domain-containing adapter protein                              | 221  | 42.53 | 0.5508 | 3  | 1-88 (88)                    | 1-9 (9)<br>14-33 (20)                                        | 24                      |
| MYD88 (Q99836)                                                              | Myeloid differentiation primary response protein MyD88                                                          | 296  | 19.93 | 0.3572 | 3  | 109-130 (30)                 | N/P                                                          | 66                      |
| IRAK1 (P51617)                                                              | IL-1 receptor-associated kinase 1                                                                               | 712  | 52.67 | 0.5516 | 9  | 501-712 (212)                | 139-147 (9)<br>158-163 (6)<br>492-502 (11)                   | 67                      |

|                       |                                                                                                                          |     |       |        |    |               |                                                                                                                                                                                            |            |
|-----------------------|--------------------------------------------------------------------------------------------------------------------------|-----|-------|--------|----|---------------|--------------------------------------------------------------------------------------------------------------------------------------------------------------------------------------------|------------|
|                       |                                                                                                                          |     |       |        |    |               | 518-527 (10)<br>557-577 (21)<br>590-621 (32)<br>640-650 (11)<br>660-697 (38)                                                                                                               |            |
| IRAK4 (Q9NWZ3)        | IL-1 receptor-associated kinase 4                                                                                        | 460 | 33.48 | 0.4224 | 7  | 107-173 (67)  | 164-173 (10)<br>428-437 (10)                                                                                                                                                               | 25         |
| TRAF6 (Q9Y4K3)        | TNF receptor-associated factor 6                                                                                         | 522 | 23.37 | 0.3888 | 8  | 1-52 (52)     | N/P                                                                                                                                                                                        | 152        |
| TAK1/ MAP3K7 (O43318) | Transformation growth factor- $\beta$ (TGF- $\beta$ )-activated kinase; Mitogen-activated protein kinase kinase kinase 7 | 606 | 57.10 | 0.5751 | 8  | 296-415 (120) | 281-292 (12)<br>298-304 (7)<br>316-324 (9)<br>344-357 (14)<br>363-376 (14)<br>388-407 (20)<br>414-434 (21)<br>438-448 (11)<br>456-468 (13)<br>494-515 (22)<br>517-548 (32)<br>580-589 (10) | 92         |
| MAPK1 (P28482)        | Mitogen-activated protein kinase 1; Extracellular signal-regulated kinase 2                                              | 350 | 16.67 | 0.3075 | 3  | 315-360 (46)  | N/P                                                                                                                                                                                        | 271        |
| MAPK3 (P27361)        | Mitogen-activated protein kinase 3; Extracellular signal-regulated kinase 1                                              | 379 | 22.96 | 0.3569 | 7  | 1-36 (36)     | N/P                                                                                                                                                                                        | 277        |
| MAPK4 (P31152)        | Mitogen-activated protein kinase 4                                                                                       | 587 | 41.06 | 0.4576 | 11 | 467-546 (90)  | 333-344 (12)<br>353-362 (10)<br>422-443 (22)<br>454-465 (12)<br>486-500 (15)<br>532-552 (21)                                                                                               | 59 (0.400) |

|                      |                                                                                |     |       |        |    |               |                                                                                                                                                                             |             |
|----------------------|--------------------------------------------------------------------------------|-----|-------|--------|----|---------------|-----------------------------------------------------------------------------------------------------------------------------------------------------------------------------|-------------|
|                      |                                                                                |     |       |        |    |               | 561-570 (10)<br>576-587 (12)                                                                                                                                                |             |
| MAPK6 (Q16659)       | Mitogen-activated protein kinase 6                                             | 721 | 43.13 | 0.4644 | 16 | 616-721 (106) | 468-475 (8)<br>527-534 (8)<br>602-611 (10)<br>627-633 (7)<br>664-679 (16)<br>713-721 (9)                                                                                    | 61          |
| MAPK7 (Q13164)       | Mitogen-activated protein kinase 7                                             | 816 | 63.24 | 0.6389 | 6  | 340-751 (412) | 363-368 (6)<br>379-389 (11)<br>395-432 (38)<br>444-456 (13)<br>466-501 (36)<br>543-592 (50)<br>609-633 (25)<br>649-732 (84)<br>737-760 (24)<br>771-785 (15)<br>800-816 (17) | 187 (0.400) |
| MAPK8/JNK1 (P45983)  | Mitogen-activated protein kinase 8; c-Jun N-terminal kinase 1                  | 427 | 27.63 | 0.3735 | 5  | 361-427 (67)  | 319-324 (6)<br>352-363 (12)<br>377-387 (11)<br>397-402 (6)<br>413-427 (15)                                                                                                  | 162         |
| MAPK9/JNK2 (P45984)  | Mitogen-activated protein kinase 9; c-Jun N-terminal kinase 2                  | 424 | 27.36 | 0.3783 | 6  | 358-424 (67)  | 320-325 (6)<br>352-362 (11)<br>391-424 (34)                                                                                                                                 | 65          |
| MAPK10/JNK3 (P53779) | Mitogen-activated protein kinase 10; c-Jun N-terminal kinase 3                 | 464 | 26.72 | 0.3747 | 6  | 376-464 (89)  | 356-363 (8)<br>390-399 (10)<br>431-464 (34)                                                                                                                                 | 49          |
| MAPK11 (Q15759)      | Mitogen-activated protein kinase 11; Mitogen-activated protein kinase p38 beta | 364 | 21.15 | 0.3771 | 5  | 309-364 (56)  | 282-290 (9)<br>301-311 (11)<br>337-348 (12)                                                                                                                                 | 139         |



|                        |                                                                                 |     |       |        |    |               |                                                                                                                           |            |
|------------------------|---------------------------------------------------------------------------------|-----|-------|--------|----|---------------|---------------------------------------------------------------------------------------------------------------------------|------------|
| MAPK12<br>(P53778)     | Mitogen-activated protein kinase 12; Mitogen-activated protein kinase p38 gamma | 367 | 24.52 | 0.3432 | 5  | 311-367 (55)  | 286-293 (7)                                                                                                               | 43         |
| MAPK13<br>(O15264)     | Mitogen-activated protein kinase 13; Mitogen-activated protein kinase p38 delta | 365 | 30.68 | 0.3859 | 4  | 254-336 (83)  | 301-308 (8)<br>341-350 (10)                                                                                               | 36         |
| MAPK14<br>(Q16539)     | Mitogen-activated protein kinase 14; Mitogen-activated protein kinase p38 alpha | 360 | 13.89 | 0.2952 | 6  | 313-327 (15)  | N/P                                                                                                                       | 207        |
| MAPK15<br>(Q8TD08)     | Mitogen-activated protein kinase 15                                             | 544 | 53.31 | 0.5137 | 8  | 315-516 (302) | 280-288 (9)<br>329-350 (22)<br>361-384 (24)<br>401-429 (29)<br>434-484 (51)<br>516-536 (21)                               | 39 (0.400) |
| AP-1/C-JUN<br>(P05412) | Transcription factor Jun                                                        | 331 | 82.78 | 0.7235 | 8  | 123-322 (200) | 66-81 (16)<br>110-121 (12)<br>143-151 (9)<br>157-201 (45)<br>209-229 (21)<br>241-250 (10)<br>252-284 (33)<br>312-324 (13) | 209        |
| AP-1/C-FOS<br>(P01100) | Protein c-FOS                                                                   | 380 | 83.42 | 0.7553 | 4  | 213-321 (112) | 74-83 (10)<br>103-118 (16)<br>148-155 (8)<br>180-212 (33)<br>215-227 (13)<br>237-244 (8)<br>262-275 (14)<br>294-302 (9)   | 131        |
| IKK $\alpha$ (O15111)  | Inhibitor of nuclear factor- $\kappa$ B (NF- $\kappa$ B) kinase subunit alpha   | 745 | 24.56 | 0.3623 | 10 | 664-711 (48)  | 71-723 (11)<br>738-745 (8)                                                                                                | 104        |

|                         |                                                                                                                      |     |       |        |    |               |                                                                                                                                                                          |     |
|-------------------------|----------------------------------------------------------------------------------------------------------------------|-----|-------|--------|----|---------------|--------------------------------------------------------------------------------------------------------------------------------------------------------------------------|-----|
| IKK $\beta$ (O14920)    | Inhibitor of nuclear factor- $\kappa$ B (NF- $\kappa$ B) kinase subunit beta                                         | 756 | 35.45 | 0.4382 | 16 | 635-713 (79)  | 394-392 (9)<br>655-664 (10)<br>709-723 (15)<br>734-742 (9)                                                                                                               | 95  |
| IKK $\gamma$ (Q9Y6K9)   | Inhibitor of nuclear factor- $\kappa$ B (NF- $\kappa$ B) kinase subunit gamma; NF-kappa-B essential modulator (NEMO) | 419 | 98.57 | 0.8288 | 2  | 1-232 (232)   | 1-15 (15)<br>33-41 (9)<br>230-242 (13)<br>304-310 (7)<br>372-380 (9)<br>407-419(13)                                                                                      | 116 |
| IKK $\epsilon$ (Q14164) | Inhibitor of nuclear factor- $\kappa$ B (NF- $\kappa$ B) kinase subunit epsilon                                      | 716 | 23.88 | 0.3811 | 13 | 470-542 (73)  | 679-698 (20)                                                                                                                                                             | 20  |
| NFKBIA/IKBA (P25963)    | NF-kappa-B inhibitor alpha; I-kappa-B-alpha                                                                          | 317 | 39.75 | 0.4695 | 2  | 1-72 (72)     | 1-6 (6)<br>78-84 (9)<br>302-317 (16)                                                                                                                                     | 133 |
| p65/RELA/NFKB3 (Q04206) | Transcription factor p65; Nuclear factor NF-kappa-B p65 subunit                                                      | 551 | 64.61 | 0.6443 | 5  | 257-457 (201) | 1-11 (11)<br>31-41 (11)<br>62-75 (15)<br>98-103 (6) 110-113 (9) 285-290 (6) 305-317 (13)<br>350-380 (31)<br>398-414 (17)<br>433-483 (51)<br>492-504 (13)<br>523-551 (29) | 235 |
| p50/NFKB1 (P19838)      | Nuclear factor NF-kappa-B p105 subunit                                                                               | 968 | 33.16 | 0.4490 | 15 | 335-482 (148) | 369-374 (6)<br>403-421 (19)<br>454-463 (10)<br>781-787 (7)<br>931-953 (23)                                                                                               | 156 |
| p52/NFKB2 (Q00653)      | Nuclear factor NF-kappa-B p100 subunit                                                                               | 900 | 59.89 | 0.5837 | 14 | 690-900 (211) | 8-21 (14)<br>39-44 (6)                                                                                                                                                   | 41  |

|               |                                                                |     |       |        |    |               |                                                                                                                                                                             |     |
|---------------|----------------------------------------------------------------|-----|-------|--------|----|---------------|-----------------------------------------------------------------------------------------------------------------------------------------------------------------------------|-----|
|               |                                                                |     |       |        |    |               | 112-123 (12)<br>373-389 (17)<br>445-458 (14)<br>648-655 (8)<br>672-694 (23)<br>728-753 (26)<br>766-784 (19)<br>792-806 (15)<br>816-848 (33)<br>859-880 (22)<br>885-900 (16) |     |
| IRF3 (Q14653) | Interferon regulatory factor 3                                 | 427 | 37.94 | 0.4565 | 9  | 84-196 (113)  | 52-60 (9)<br>105-118 (14)<br>135-168 (34)<br>202-211 (10)                                                                                                                   | 109 |
| IRF5 (Q13568) | Interferon regulatory factor 5                                 | 498 | 43.17 | 0.5151 | 8  | 106-242 (137) | 19-29 (11)<br>39-47 (9)<br>88-105 (18)<br>115-124 (10)<br>135-142 (8)<br>149-195 (47)<br>206-221 (16)<br>231-253 (23)                                                       | 68  |
| IRF7 (Q92985) | Interferon regulatory factor 7                                 | 503 | 58.05 | 0.5520 | 12 | 125-268 (162) | 59-65 (7)<br>91-108 (18)<br>120-132 (13)<br>155-205 (51)<br>216-242 (27)<br>252-258 (7)<br>270-278 (9)<br>288-315 (28)                                                      | 104 |
| TBK1 (Q9UHD2) | Serine/threonine-protein kinase<br>TBK1; TANK-binding kinase 1 | 729 | 10.62 | 0.3349 | 12 | 644-704 (61)  | N/F                                                                                                                                                                         | 52  |



|                         |                                                                                                                                              |     |       |        |    |               |                                                                                                                                                                           |            |
|-------------------------|----------------------------------------------------------------------------------------------------------------------------------------------|-----|-------|--------|----|---------------|---------------------------------------------------------------------------------------------------------------------------------------------------------------------------|------------|
| CD14 (P08571)           | Cluster of differentiation 14;<br>Monocyte differentiation<br>antigen CD14                                                                   | 375 | 25.87 | 0.2891 | 10 | 305-330 (26)  | 280-285 (6)<br>299-305 (7)                                                                                                                                                | 39         |
| TANK (Q92844)           | TRAF family member-associated<br>NF-kappa-B activator                                                                                        | 425 | 70.35 | 0.6059 | 8  | 162-267 (106) | 12-21 (10)<br>54-65 (12)<br>73-78 (6)<br>142-159 (18)<br>228-236 (9)<br>263-270 (8)<br>286-299 (14)<br>337-344 (8)<br>394-403 (10)                                        | 32         |
| TRIF/TICAM1             | Toll-interleukin-1 receptor<br>domain-containing adapter<br>protein inducing interferon<br>beta; TIR domain-containing<br>adapter molecule 1 | 712 | 66.29 | 0.6621 | 9  | 124-393 (270) | 96-104 (9)<br>185-194 (10)<br>201-223 (23)<br>228-267 (40)<br>273-341 (69)<br>374-384 (11)<br>392-403 (12)<br>567-578 (12)<br>588-595 (8)<br>649-666 (18)<br>673-703 (31) | 34         |
| RIP1/RIPK1<br>(Q13546)  | Receptor-interacting protein 1;<br>Receptor-interacting<br>serine/threonine-protein kinase<br>1                                              | 671 | 47.84 | 0.4978 | 11 | 291-482 (192) | 318-329 (12)<br>345-363 (19)<br>376-392 (17)<br>401-406 (6)<br>415-475 (61)<br>531-547 (17)                                                                               | 99         |
| TRAM/TICAM2<br>(Q86XR7) | TRIF related adapter molecule;<br>TIR domain-containing adapter<br>molecule 2                                                                | 235 | 50.21 | 0.5112 | 4  | 1-77 (77)     | 1-18 (18)<br>39-46 (8)<br>75-85 (11)                                                                                                                                      | 25         |
| IFNA1 (P01562)          | Interferon alpha                                                                                                                             | 189 | 31.75 | 0.3759 | 4  | 22-56 (36)    | N/P                                                                                                                                                                       | 74 (0.700) |
| IFNA4 (P05014)          | Interferon alpha 4                                                                                                                           | 189 | 16.40 | 0.3241 | 4  | 180-189 (10)  | N/P                                                                                                                                                                       | 78 (0.400) |

|                |                 |     |       |        |   |              |     |    |
|----------------|-----------------|-----|-------|--------|---|--------------|-----|----|
| IFNB1 (P01574) | Interferon beta | 187 | 11.76 | 0.2695 | 4 | 124-136 (13) | N/P | 44 |
|----------------|-----------------|-----|-------|--------|---|--------------|-----|----|

<sup>a</sup> Data on protein-protein interactions for HCV proteins are derived from [1]

<sup>b</sup> Interaction data are derived from STRING-based analysis using medium confidence (0.400) for a minimum required interaction score

<sup>c</sup> Interaction data are derived from STRING-based analysis using highest confidence (0.900) for a minimum required interaction score

<sup>d</sup> Interaction data are derived from STRING-based analysis using high confidence (0.700) for a minimum required interaction score

## References

1. Fan, X.; Xue, B.; Dolan, P.T.; LaCount, D.J.; Kurgan, L.; Uversky, V.N. The intrinsic disorder status of the human hepatitis C virus proteome. *Molecular bioSystems* **2014**, *10*, 1345-1363, doi:10.1039/c4mb00027g.
